# Supplementary material for: Looking for a generic inhibitor of amyloid-like fibril formation among flavone derivatives
Source: PeerJ. 2015 Sep 24;3:e1271. doi: 10.7717/peerj.1271 (PMC4586895; doi:10.7717/peerj.1271)
Supplement: Supplemental Information 2 — Raw data [file peerj-03-1271-s002.xlsx]

## Sheet: plate1
Set Temperature	Setpoint 60°C
Excitation: 450/9.0, Emission: 482/9.0
Optics: Bottom, Gain: 85
	[Scutellarein]:[a-Syn]																	[Luteolin]:[a-Syn]																		[7,8,2'-trihydroxyflavone]:[a-Syn]
Time, min	0.25:1	0.25:1	0.5:1	0.5:1	0.5:1	0.75:1	0.75:1	0.75:1	1:1	1:1	1:1	1.25:1	1.25:1	1.25:1	1.5:1	1.5:1	1.5:1	0.25:1	0.25:1	0.25:1	0.5:1	0.5:1	0.5:1	0.75:1	0.75:1	0.75:1	1:1	1:1	1:1	1.25:1	1.25:1	1.25:1	1.5:1	1.5:1	1.5:1	0.25:1	0.25:1	0.25:1	0.5:1	0.5:1	0.5:1	0.75:1	0.75:1	0.75:1	1:1	1:1	1:1	1.25:1	1.25:1
1.3	1075	1204	663	747	757	605	746	684	497	774	951	404	400	483	297	402	351	1043	817	1230	806	689	629	541	530	546	527	388	548	506	403	642	506	466	460	944	706	772	640	720	705	534	614	643	460	550	546	419	418
3.3	1076	1093	682	753	758	663	694	628	468	569	701	615	371	383	504	404	426	853	881	940	628	708	694	533	558	499	450	574	440	490	422	538	374	426	498	833	624	727	569	651	751	500	505	457	428	437	580	311	403
5.3	1032	890	641	711	845	605	571	726	446	643	485	575	336	463	427	403	438	1117	731	848	806	757	643	466	494	554	538	477	478	480	418	479	484	475	408	737	797	775	617	776	600	603	479	535	467	608	683	514	352
7.3	998	1118	636	623	764	571	683	705	682	681	1763	808	423	494	534	409	484	874	799	758	730	1385	581	502	644	560	662	433	515	448	443	493	608	367	397	730	545	628	503	638	590	553	424	435	417	386	547	199	464
9.3	905	1045	648	608	751	649	611	560	413	656	2075	653	487	554	615	568	554	822	788	860	636	706	683	732	726	450	570	504	493	401	408	627	393	383	418	719	532	530	535	550	745	588	501	596	502	628	613	393	372
11.3	741	988	768	602	822	584	715	823	573	895	859	482	439	505	507	644	471	906	678	982	746	1456	617	534	578	566	675	488	504	410	461	543	326	531	574	760	586	724	559	567	745	747	540	401	434	619	647	335	558
13.3	1069	995	554	614	637	526	775	637	492	766	878	790	519	564	411	486	436	931	761	878	664	537	684	561	598	575	634	500	476	475	471	641	431	478	425	824	629	698	492	480	613	671	515	685	450	513	625	251	394
15.3	945	1013	639	776	784	517	678	1055	608	797	572	1084	547	619	425	556	453	888	841	1036	1196	741	1187	484	721	557	817	525	557	414	590	603	433	485	538	841	460	830	566	693	814	633	617	616	760	534	843	406	572
17.3	1552	995	560	580	708	558	871	1090	600	721	1002	614	544	516	503	543	515	1130	720	928	754	678	880	729	724	562	842	669	644	516	468	690	644	391	694	744	743	781	500	852	738	805	401	465	635	568	677	264	534
19.3	968	926	739	656	1264	691	1004	1131	515	1175	1119	963	672	619	397	550	512	1031	902	915	791	732	927	731	764	521	822	535	528	485	559	764	438	563	480	902	541	855	490	714	790	888	610	434	521	784	1023	320	580
21.3	1100	960	807	925	991	704	977	1166	635	837	1228	1176	562	593	529	520	577	996	1949	1185	896	991	1505	656	881	632	806	693	580	491	522	644	635	595	710	923	588	738	594	757	911	1096	621	637	448	740	1032	274	485
23.3	982	1126	910	638	1429	694	1173	1011	769	1939	1680	929	500	683	434	631	588	1293	1054	1060	1276	825	1205	716	946	499	919	702	575	360	770	885	729	465	647	1219	756	941	686	718	871	1242	599	849	677	841	968	258	542
25.3	1132	1531	773	1007	1500	971	1374	952	639	1789	1494	1017	624	639	605	508	528	1195	826	1135	1328	1012	1272	676	1036	561	1165	1055	762	566	782	1235	871	515	969	1308	727	911	645	784	1066	1422	590	1167	645	1161	1460	488	531
27.3	1304	1646	775	1147	2103	803	2128	1556	691	1508	2615	1128	983	627	483	750	615	1514	1088	1316	1565	1812	1431	676	811	616	1631	1105	639	459	691	1061	1104	447	821	1587	867	1513	717	1117	1316	1692	709	593	816	553	1443	240	464
29.3	794	1649	1054	904	1026	974	2205	1611	915	1747	1907	1611	712	559	531	761	703	1336	1049	1313	1529	1347	1625	806	1141	806	2009	1322	879	566	884	1341	968	680	1307	1615	939	1090	524	772	1077	1893	672	961	785	887	1959	286	689
31.3	1463	1598	1109	1200	1415	1100	2409	1954	918	2030	2450	1347	624	494	621	1120	699	2152	1720	1650	1548	1636	2755	724	577	810	1743	1394	990	660	1084	1749	1288	714	1142	1873	699	1651	863	1061	1582	1698	751	1650	1579	1686	1505	306	672
33.3	1314	1682	1482	1678	2075	1275	2443	1931	953	2765	2239	1180	924	642	477	734	811	1975	1593	1408	1941	1421	1656	994	1542	792	1896	1542	818	764	1162	1732	1669	698	1104	1663	933	1808	926	772	1448	2292	989	1719	770	1624	1474	311	626
35.3	1235	2040	1222	1852	2086	1301	2539	1932	1252	2413	2619	2090	717	920	496	808	1024	2559	1446	1417	1869	1520	1829	989	1717	810	1963	1424	1002	824	1177	1741	1470	874	1117	2027	1014	1235	1133	1566	1423	1600	1473	1651	874	1876	1351	295	711
37.3	1571	2133	1465	1192	2160	1245	2559	1984	1175	1316	2270	2318	1595	723	598	889	937	2111	1493	1660	2110	1863	2175	1007	1971	775	2014	2042	1010	843	1327	1427	893	615	1090	2125	1178	2094	1204	1605	1966	2159	1141	956	1176	2057	1516	290	856
39.3	1106	2009	1725	1961	2591	1494	2544	1985	1427	2789	1974	1275	1220	1264	472	1258	982	1898	1724	1726	2030	1668	2259	1023	1966	1016	1901	1847	1381	944	1232	1794	964	699	1497	2114	1176	1476	1238	1410	1509	1971	1786	884	1089	2001	3066	470	694
41.3	1186	2401	1535	1683	2380	1449	2491	1287	1132	1344	2476	1285	696	1073	744	1053	1358	2137	1504	1660	1798	1877	1948	1449	1913	949	3361	2216	1266	941	1138	1760	1177	833	1141	2338	1016	1965	1297	1543	1418	2257	1363	1250	2010	1929	2121	474	939
43.3	1202	2144	1640	1365	2296	1436	2002	2340	1369	2599	2517	1503	889	1029	596	747	1052	2748	1720	1947	2324	925	1980	1622	2273	1457	2347	1865	1350	1034	1162	1725	1549	846	1421	2246	1462	2037	1125	1411	1739	2093	1895	2065	1496	1845	2265	455	946
45.3	1515	2078	1739	1780	2367	1365	2762	1810	1110	1544	2597	2155	1418	810	452	1280	1327	2042	1766	1511	1985	1962	2192	1515	2287	1225	2802	1812	1323	963	1061	1538	1606	906	1479	2400	990	2106	1580	1302	2359	2135	1650	1028	2133	1975	2167	305	811
47.3	1627	2363	1679	1995	2478	1631	1893	1921	1808	1699	2441	1421	1520	1578	705	1482	1471	2656	1617	1517	2314	1870	1899	1146	1232	852	2377	1764	1326	1041	1175	1986	1228	924	1150	2231	1449	2014	936	1447	2094	2162	1315	851	985	943	2192	584	1070
49.3	2783	2382	1706	2163	2379	1627	2603	1920	1298	2380	2410	1095	654	1008	573	1188	1455	2363	1899	1898	2052	1877	2200	1520	2377	812	2376	1841	1120	1354	1175	1690	1080	870	790	2293	1136	2120	1631	1663	1673	2033	1366	1870	1063	1494	1884	383	851
51.3	1567	2582	1939	1346	2253	1418	1886	2462	1506	2379	1770	959	734	1010	631	1383	1071	2055	2182	1958	2420	1925	2395	1192	2290	788	2206	1678	971	1520	1224	1489	951	823	1278	2082	1191	2087	1224	1878	1717	2026	2001	1824	1639	1967	1470	506	953
53.3	1696	1738	1941	1861	2238	1559	2636	2584	1729	1014	2377	1054	1632	1090	843	1503	1453	2918	1927	1894	2234	2367	2300	1784	2156	906	1858	1891	1602	1286	1154	1526	985	819	1339	2031	842	1412	1426	1155	2118	2042	1548	955	2009	1909	2255	463	1138
55.3	2042	2367	1842	2001	2230	1635	2429	1170	1678	1296	2159	1371	916	1293	851	1046	1474	2824	1872	1997	2278	2077	2033	1720	2316	1419	2163	1825	1035	1308	1028	1531	1242	1013	1130	2169	1086	2066	1037	1982	2047	2078	1351	1188	1006	935	3171	447	921
57.3	1814	1908	1815	1804	2266	1756	874	1856	1730	1124	2497	1924	652	1151	671	1127	1406	2168	2171	1702	2046	2473	2405	1571	2082	1083	1940	1674	1459	1203	1178	1702	1495	908	1516	2003	1585	2047	1291	2223	1955	1405	1804	727	2049	1680	1739	509	895
59.3	2253	1543	1770	943	2014	1643	2247	1129	1643	1269	1655	1453	722	907	805	1201	1137	2078	2059	1620	2374	2076	2037	1441	2297	1047	2468	1945	1077	1338	979	1594	1359	1009	1178	2269	748	1245	1681	2210	1443	1782	1602	1040	1493	1594	2701	529	1438
61.3	1928	2267	1776	1003	1605	1447	1473	2187	1578	1087	2098	1489	646	1174	985	1407	1592	2321	2109	1840	2124	1121	2310	1795	2360	1287	2022	1586	1209	1465	1135	1449	946	560	1411	1948	1119	2035	1363	1564	1649	2065	1983	1066	1055	1591	2057	556	1201
63.3	1877	2365	1600	1360	1936	1549	1990	2159	1760	2207	1297	1615	900	2006	713	946	1331	2293	2075	1452	1814	1911	2124	1466	1564	1252	1923	1476	1027	1505	931	1438	1247	1273	1403	1869	1622	2114	1400	1629	1630	1702	1606	1072	919	1483	1220	506	1379
65.3	1647	2319	2011	1022	2419	1699	1878	2029	1756	1931	1753	1601	1386	2044	1103	1208	1058	2255	2028	1680	1947	876	1906	1934	2176	801	1971	1768	1273	1139	945	1521	951	1203	1155	1908	1278	1887	1622	1997	1396	1665	1399	693	873	1607	2249	773	1130
67.3	1653	1660	1692	1488	2040	1745	1954	2252	1786	1430	1854	1755	787	1110	641	1605	1405	2143	2154	1743	1699	1671	2366	1553	1339	1031	1820	1610	1031	1205	864	1293	1208	858	1197	1930	1878	1999	1544	2490	1402	1812	1538	864	937	1454	2582	607	1081
69.3	1786	1690	1935	1340	1493	1610	2378	1241	1881	1178	1629	1098	764	1674	1221	1223	1455	1812	1723	1592	2279	1863	2185	1363	2083	1137	1619	1578	1188	1370	912	1277	1164	1091	1306	1699	1070	1553	1528	1682	1358	1332	1704	887	883	781	2475	642	1460
71.3	2069	2323	1835	1289	2089	1637	1984	1560	1748	1051	2045	876	749	1209	683	883	1326	2441	2138	1688	2038	679	1864	2072	2180	1108	1571	1464	1090	1315	797	1108	959	719	1280	2022	991	1839	1179	2068	1326	1375	1508	1075	845	902	1942	710	1082
73.3	1829	1583	1686	1517	1966	1641	1989	2316	1752	1706	1940	627	1312	1500	1141	787	1414	2632	1694	1677	1989	1772	1904	1607	2123	955	2289	1444	954	1299	864	1288	1165	1094	1109	1714	1567	1857	1453	1956	1281	1802	1108	733	881	791	2010	728	1365
75.3	2182	1998	2056	1061	1977	1832	1819	2121	1346	921	1904	1135	764	1123	815	1281	1382	2541	1842	1421	1869	1768	2076	1853	2109	1348	2458	1372	1279	1278	960	1525	949	1051	1028	1804	959	1660	1097	2294	1599	1318	1101	1278	1280	1203	1256	565	885
77.3	1903	1792	1684	1438	2052	1527	1705	1893	1946	1640	1976	810	950	1381	1167	979	1261	1958	2040	1511	1649	1626	2091	1630	997	1159	2274	1249	1229	1134	856	1115	920	845	1227	1731	1451	1826	1350	1731	1214	1429	1203	699	714	555	1843	854	1096
79.3	2244	2162	1801	1302	1762	1690	1339	1050	1691	868	1225	1071	758	904	730	1292	1222	1606	1925	1621	1848	1739	2090	1720	1979	1207	1892	1307	828	1305	815	1115	768	621	958	1617	839	1508	1070	1709	1605	1498	1264	1028	799	1142	1566	710	1405
81.3	1996	2211	1940	913	1928	1662	1127	1040	1881	1968	1061	1244	1149	2029	949	1103	1315	1683	1745	1390	1617	1707	1785	1592	2134	1418	1674	1298	947	1253	798	1084	811	989	986	1739	1283	1677	1537	2166	1720	1321	1168	793	681	1253	1177	874	1418
83.3	2006	2051	2080	756	1653	1579	1503	1376	1687	1054	1082	946	828	1523	1275	1056	1353	2552	2315	1422	1572	1200	1967	1707	2132	1446	2067	1168	1034	1084	662	1158	901	945	1007	1737	1474	1561	1386	1462	1292	1611	1080	1208	1152	805	1873	712	921
85.3	1781	1913	1736	1168	1895	1460	1360	1323	1603	1733	1794	1552	750	1384	1367	1298	1025	2030	1939	1430	1696	1750	1932	1448	1960	943	1695	1041	878	1157	796	1243	1019	959	1152	1732	1203	1696	1156	1324	1222	1264	897	822	786	1139	1061	762	1095
87.3	1867	1749	1634	683	1293	1413	1580	1436	1666	1661	1912	1299	686	1983	1108	1336	1300	1937	1819	1633	1709	1243	1729	1360	1803	1251	1723	1244	928	1167	784	1127	866	536	1071	1730	1588	1453	1403	1979	1146	1201	1057	779	807	1231	1386	811	1410
89.3	1829	1709	1983	1263	1274	1505	1242	1746	1595	984	1460	792	503	1714	915	1124	1204	2466	1638	1373	1832	1565	1720	1474	1941	831	1288	1267	1177	1149	594	914	904	912	1078	1595	1561	1589	1182	1928	1171	1147	1233	764	797	1122	1728	744	1237
91.3	1903	1507	1709	1188	1702	1288	1598	1245	1713	1042	1063	829	767	1636	707	1107	1267	1656	1881	1507	1729	1651	1628	1397	1715	766	1745	1096	1090	1209	648	949	880	571	958	1617	880	1614	1172	1585	1540	1156	1049	639	738	969	1037	938	1245
93.3	1735	1800	1764	637	1417	1361	714	1037	1702	1492	970	1227	596	1959	706	1184	1262	1590	1672	1337	1714	2221	1810	1407	1945	1419	1348	1015	846	1040	635	966	834	1049	747	1582	1048	1438	1061	1442	1068	1074	1235	604	768	1118	1014	632	1234
95.3	1828	1569	1655	910	1740	1395	1508	1788	1705	1563	1881	474	469	1052	740	796	918	1835	1895	1469	1783	1771	1900	1730	1361	1219	1212	1022	729	1311	575	960	602	701	916	1571	1022	1490	1170	1935	1326	1275	1113	910	741	1120	1709	786	1041
97.3	2045	1691	1637	876	1558	1292	1246	1060	1592	730	1840	1426	570	939	1033	1237	1229	2691	1567	1208	1700	1587	1983	1765	1671	847	1654	1042	859	1114	639	1068	747	978	686	1495	1413	1437	1083	1348	1324	1360	980	1040	872	991	1046	775	1123
99.3	1609	1910	1641	1232	1390	1328	935	1099	1524	907	1915	700	618	1625	900	707	674	1606	1865	1220	1657	1526	1808	1500	1568	1030	1498	1025	910	1204	510	860	672	929	837	1530	920	1329	1193	1984	1422	1083	1014	813	716	1176	1122	936	1357
101.3	1909	1933	1535	667	1258	1503	1304	1523	1492	1300	743	561	577	1995	1344	1097	732	1805	2002	1281	1731	1452	1620	1384	1659	755	1076	970	799	1132	524	976	466	895	663	1460	1462	1372	1097	1363	1173	1189	1122	949	633	935	1349	664	1009
103.3	1929	1686	1716	1049	1468	1185	1343	868	1526	1330	1755	902	826	1621	1144	798	861	1660	1718	1308	1475	1522	1463	1356	1691	775	1280	943	1020	1122	619	875	602	867	803	1280	1040	1320	1269	1663	1262	1186	1227	631	686	497	1303	657	1356
105.3	1534	1502	1672	917	1107	1368	1474	1670	1592	1335	1121	648	802	1092	1047	1006	1185	1502	1679	1233	1340	1618	1659	1440	1452	809	1510	879	1033	1062	535	922	444	399	901	1556	1132	1373	1421	1876	1192	1298	1112	853	709	897	1352	795	1267
107.3	1897	1748	1509	935	1333	1334	1301	959	1552	1130	1278	734	613	998	1114	869	900	2126	1586	1214	1394	1411	1644	1478	1735	944	1201	847	1087	1099	467	909	811	907	991	1428	808	1348	1047	1811	1049	924	949	853	630	952	1174	627	1093
109.3	1913	1290	1457	1040	1443	1389	974	1416	1635	1241	1456	1020	789	813	1221	906	1018	1659	1604	1401	1297	1453	1587	1706	1608	1031	1624	893	1013	1072	468	654	594	744	860	1611	1342	1218	927	1644	1119	1076	1082	599	914	1063	1027	798	1297
111.3	1517	1336	1511	622	1667	1214	1385	1099	1442	631	1221	987	369	1158	890	986	994	1497	1914	1142	1397	1397	1662	1568	1533	843	1488	783	903	902	526	847	718	760	890	1518	960	1139	1162	1391	1405	1050	1096	826	1129	897	1037	791	1022
113.3	1637	1654	1456	830	1340	1287	1386	1464	1411	672	1661	1106	571	1535	869	929	798	1456	1860	1213	1386	1369	1891	1185	1050	1206	1161	859	768	944	468	790	526	655	719	1586	1091	1291	818	1729	1087	1027	1026	935	708	865	1187	649	1033
115.3	1840	1558	1377	873	1519	1158	1382	1068	1640	927	1868	913	636	1604	1059	752	990	1629	1876	853	1469	850	1621	1566	1218	1156	1139	906	730	1102	501	729	473	592	714	1475	1359	1220	864	1693	1288	1093	896	592	738	1022	1398	978	1414
117.3	1766	1655	1533	1015	1112	1258	1174	1298	1508	1275	788	975	792	1291	630	744	818	1839	1767	1047	1376	1296	1539	1552	1413	766	961	775	783	929	377	789	547	568	810	1335	1149	1272	1325	1503	1438	800	985	846	837	960	1124	865	984
119.3	1790	1432	1521	1056	1461	1106	910	1478	1285	1065	1470	776	682	1150	1136	958	872	1405	1674	1161	1597	1404	1718	1361	1330	665	1364	780	814	931	477	842	475	662	863	1404	1442	1364	1189	1572	1068	1241	995	722	888	1075	1543	997	938
121.3	1738	1720	1542	797	1366	1078	1050	1283	1526	1244	796	722	730	1061	722	689	1029	1575	1428	1199	1228	1302	1602	1441	1474	1140	959	802	682	972	446	829	615	653	688	1408	1017	1136	801	1424	1090	1273	745	634	615	1304	1183	778	898
123.3	1395	1522	1564	865	1335	1163	962	862	1468	534	1142	620	552	1193	1145	820	577	1553	2083	1004	1434	1367	1694	1446	1287	1300	957	702	896	942	376	803	495	526	634	1276	1126	960	795	1464	1182	1092	871	814	624	880	1311	950	1015
125.3	1558	1336	1470	804	1422	1136	741	907	1629	679	1371	798	622	1705	926	990	1044	1388	1758	1195	1550	1260	1300	1293	1195	723	899	740	879	910	370	871	654	750	712	1273	851	1392	1102	1601	1138	1223	1018	829	846	583	1117	918	1078
127.3	1537	1291	1437	989	1385	1142	909	693	1469	1029	996	888	824	1028	574	730	878	1788	1758	1163	1219	714	1518	1280	1351	814	1018	781	760	916	415	747	576	712	451	1312	1129	1303	785	1471	1070	1174	1088	732	880	892	918	870	1166
129.3	1763	1325	1512	832	1461	1269	1031	1272	1457	1009	1274	539	595	1502	589	639	960	1292	1795	1244	1376	1192	1383	1420	1376	1076	880	651	678	998	371	681	456	690	787	1466	944	886	879	1573	1072	1054	764	649	1043	780	975	810	989
131.3	2057	1281	1429	880	1322	1122	703	1326	1355	1139	1424	553	483	759	1191	857	978	1420	1558	1149	1336	1321	1339	1567	1120	752	1058	719	814	792	346	591	456	664	517	1433	1166	1394	1091	1249	1181	1106	679	809	660	1085	1304	818	1214
133.3	1744	1121	1499	769	1360	1065	1054	740	1444	1049	1396	614	480	958	674	742	812	1379	1627	1058	1378	1055	1484	1280	1284	739	1148	833	647	858	374	596	468	655	710	1286	954	914	944	1671	1053	1164	802	612	1051	1198	1314	711	1059
135.3	1404	1084	1412	597	864	1045	997	1125	1263	883	1169	726	638	1581	851	610	871	1760	1435	1052	1380	1478	1338	1191	1202	868	873	714	671	761	407	761	547	517	559	1363	1258	1138	795	1578	1032	995	700	664	876	900	1113	864	1227
137.3	1859	1287	1550	694	1249	1108	1060	990	1282	622	1360	837	527	1024	791	655	890	1672	1628	1237	1473	1391	1314	1313	1164	871	1032	722	886	824	310	633	388	637	688	1335	873	1169	742	1297	1084	1015	830	772	687	767	828	633	1149
139.3	1507	1687	1540	668	1314	1080	993	732	1210	956	1003	854	475	810	803	809	786	1367	1862	1006	1313	1132	1150	1457	1230	1056	798	700	790	843	371	478	433	612	808	1309	794	759	816	1514	1281	822	731	682	1052	858	1132	694	958
141.3	1723	1305	1383	790	1388	1082	1001	1270	1336	1150	996	546	635	1489	646	986	842	1234	1632	1338	1312	1323	1473	1345	1351	894	1003	746	727	895	367	627	516	593	573	1331	1229	948	815	1564	1011	1031	852	683	736	866	814	718	909
143.3	1472	1611	1245	731	1278	1062	1073	728	1306	840	1252	693	690	1290	955	716	768	1301	1213	1088	1206	1099	1876	1044	1325	1139	947	649	671	652	369	626	521	562	421	1281	827	1248	985	1177	1059	1097	864	670	967	920	998	624	1110
145.3	1821	1497	1350	876	1211	1034	747	1140	1387	933	1050	480	372	1093	1002	723	792	1335	1412	1012	1169	1094	1341	1213	1306	733	934	681	761	797	401	659	385	550	591	1364	1306	1191	933	1770	1112	1039	984	683	627	887	677	714	1136
147.3	1464	1465	1368	901	1259	1036	863	1146	1261	1000	1006	488	411	757	1009	640	555	1194	1441	1026	1212	1211	1543	1273	1053	692	798	651	680	688	380	622	444	565	537	1273	956	1164	1081	1404	1098	882	933	775	698	706	883	955	936
149.3	1708	1305	1304	688	1501	1184	864	1209	1355	628	1009	621	569	1260	565	759	802	1356	1620	744	1221	1157	1168	1091	1008	780	676	613	736	799	380	635	514	642	471	1360	1462	946	872	1488	1197	1112	791	944	859	1031	1089	769	956
151.3	1623	1392	1224	787	1247	1068	834	966	1350	734	1171	681	407	1410	874	671	819	1114	1764	1093	1313	1337	1234	1043	1191	903	674	700	714	816	392	647	621	529	559	1251	937	1058	1069	1562	1133	1154	737	729	735	787	1160	850	756
153.3	1512	1455	1377	794	1100	1188	807	1103	1224	932	1063	560	486	946	536	871	804	1494	1429	869	1173	1055	1159	1308	661	702	820	600	740	905	343	548	470	629	528	1381	884	1126	939	1208	1086	983	702	650	820	1008	988	629	1069
155.3	1454	1244	1256	612	1136	1077	849	1191	1304	910	1151	659	579	826	978	712	769	1488	1370	1112	1214	1192	1108	1356	1136	755	638	697	566	765	354	619	514	580	535	1229	922	825	755	1017	1049	915	905	496	624	845	1144	716	1096
157.3	1287	1797	1233	548	1186	907	895	1440	1167	941	933	1192	581	1402	791	785	772	1409	1613	1033	1223	1125	1377	1290	1103	944	711	742	578	836	375	676	387	620	515	1304	1058	1127	900	1481	1209	990	731	639	723	980	907	890	1024
159.3	1737	1287	1168	512	1180	1131	882	1187	1411	712	947	697	353	749	992	889	813	1252	1584	1119	1147	1789	1449	1280	1063	989	887	607	535	794	521	526	518	483	537	1187	994	1147	977	1540	952	991	759	848	643	841	1287	737	871
161.3	1665	1176	1096	754	987	1106	926	1142	1413	847	989	716	379	771	767	560	640	1230	1661	1318	1051	1185	1187	1260	1009	616	856	627	561	669	337	742	383	485	413	1226	1020	1079	1052	1138	1151	957	729	639	653	622	1184	655	1028
163.3	1732	1304	1437	741	1030	906	961	1137	1324	850	562	800	477	1229	963	596	668	1211	1544	1047	1059	1054	1196	1217	964	701	615	575	625	779	447	597	416	500	479	1139	852	791	926	1223	1042	1024	847	930	536	791	1128	809	1075
165.3	1572	1346	1164	481	1281	1051	524	1189	1254	818	1110	572	422	834	567	614	822	1343	1648	1095	1177	1052	1108	1188	1051	661	702	698	713	689	383	614	375	559	468	1253	984	1131	877	1508	988	1008	801	638	860	764	848	829	900
167.3	1530	1381	1472	524	1075	1099	862	1125	1370	851	1113	518	412	916	767	543	676	1319	1502	854	1033	1177	1316	1283	1012	951	732	688	695	657	345	595	378	499	542	1262	906	1086	821	1376	1221	957	783	773	706	814	782	703	817
169.3	1472	1387	1201	766	896	953	738	952	1249	835	1045	659	383	681	517	602	721	1221	1424	1045	1100	1030	1156	907	638	771	945	591	696	603	274	599	538	396	421	1205	896	991	991	1318	966	842	743	726	639	630	920	852	894
171.3	1644	1185	1171	558	1022	936	748	886	1222	490	1130	462	277	1313	608	599	700	1147	1546	949	1076	970	1276	1131	951	971	804	683	572	657	343	476	371	581	522	1278	1157	1182	1029	1197	1056	794	928	825	726	865	934	728	803
173.3	1472	1523	1226	583	1125	909	637	832	1203	808	747	537	351	859	554	509	710	1310	1703	1171	1041	1156	1265	1154	926	827	728	640	564	683	406	458	372	603	526	1323	940	1019	965	1011	959	997	945	739	646	540	867	694	803
175.3	1533	1411	1221	641	991	968	756	1003	1339	771	959	1019	385	1083	842	628	699	1216	1712	895	1009	1023	1990	1074	959	1010	804	593	535	660	363	565	365	480	469	1199	945	1095	1053	1420	891	906	677	738	794	988	1139	754	959
177.3	1413	1236	1180	667	1141	962	742	769	1150	516	888	468	419	978	546	639	699	1314	1427	1575	1197	848	1189	1131	902	774	672	591	581	723	515	567	387	510	519	1224	1036	1018	926	1301	1163	995	702	759	760	772	1142	630	974
179.3	1567	1120	1115	698	1030	1036	848	921	1265	476	1024	454	435	782	671	768	740	1219	1194	878	1212	812	1239	1105	766	684	719	654	602	610	394	641	293	441	469	1238	1292	1001	851	1262	984	1059	829	709	688	732	913	642	932
181.3	1441	1267	1087	646	929	846	775	853	1290	765	1078	516	476	865	622	518	729	1355	1373	1026	1178	935	1365	1086	964	771	668	632	614	633	403	611	419	632	567	1207	1219	1008	861	1351	1222	1130	871	690	824	762	1027	584	1053
183.3	1558	1157	1174	460	1277	793	716	1037	1136	786	1289	516	438	870	867	663	753	1251	1779	1289	1185	994	1150	1061	851	882	702	622	574	798	407	615	389	555	578	1263	927	853	812	1190	960	933	809	657	638	687	853	805	831
185.3	1578	1337	1201	550	1261	858	681	697	1369	429	1345	581	402	766	763	529	682	1156	1343	1073	1201	1019	1115	1063	971	720	901	657	645	645	404	597	409	536	511	1127	1077	893	1014	1420	1187	952	829	672	803	769	1119	668	945
187.3	1358	1329	1029	539	1085	812	799	913	1312	741	756	523	408	902	809	471	705	1223	1532	868	1157	837	1031	1003	793	927	709	641	628	626	459	569	495	503	552	1197	1091	804	958	1188	1047	978	712	551	784	696	908	642	891
189.3	1367	1278	1229	672	1037	980	688	1015	1276	588	828	649	401	817	677	605	648	1137	1420	907	1090	1127	1075	1007	717	908	743	728	662	530	285	483	397	531	500	1198	860	1062	970	1484	1128	880	685	590	718	617	718	801	842
191.3	1446	1245	1151	594	1074	984	694	726	1079	856	833	501	408	629	758	619	590	1062	1359	1094	1264	1095	1331	1196	797	717	656	782	562	694	379	630	498	518	574	1275	846	1117	779	1337	1002	891	762	702	684	893	1011	654	880
193.3	2093	1307	1169	576	911	1020	783	958	1209	721	840	478	389	725	560	656	636	1321	1551	1178	1157	1171	1279	1145	924	680	773	647	666	688	343	565	442	544	481	1112	1056	1026	1078	1244	918	807	880	780	737	646	911	671	810
195.3	1563	1162	1153	628	1048	899	609	735	1122	735	984	488	425	788	817	494	657	1251	1641	1282	1218	1224	1351	1034	656	854	674	691	702	675	445	650	458	529	540	1074	1056	911	933	1188	980	1143	812	648	615	661	887	755	777
197.3	1144	1225	1196	699	918	926	764	1043	1156	582	999	450	374	752	646	728	567	1430	1757	1104	1344	1165	1395	1118	673	912	843	758	621	718	463	691	598	589	719	1153	952	861	980	1234	1040	1029	754	744	695	776	980	751	902
199.3	1408	1368	1151	591	1026	967	531	1113	1277	787	1035	498	437	919	796	662	593	1199	1841	1027	1327	973	1336	1095	727	779	673	796	668	653	448	515	414	608	548	1154	918	1108	967	939	956	888	841	657	705	456	1031	664	963
201.3	1407	1275	1288	605	980	926	640	828	1103	527	985	528	406	1009	687	579	639	1116	1550	1192	1397	1098	1227	1129	999	948	865	765	703	725	365	581	319	480	475	973	757	966	1019	1287	935	912	728	598	708	693	1028	756	810
203.3	1492	1346	1334	537	1112	837	677	1127	1218	513	877	664	339	1052	741	570	638	1278	1575	1103	1347	1037	1438	998	850	527	744	703	678	620	454	734	442	528	598	1128	1088	1016	882	1419	1033	809	802	654	771	684	821	620	892
205.3	1394	1237	1207	581	1044	834	665	1020	1388	654	704	558	414	689	881	616	474	1416	1698	1176	1369	1124	1219	1280	983	736	715	746	643	803	472	696	596	490	580	1150	1003	920	821	1216	889	1018	657	573	716	589	867	752	823
207.3	1618	1341	1199	592	808	823	725	782	1053	554	917	472	296	666	542	625	654	1367	1642	1183	1424	1146	1119	1117	870	882	842	796	577	885	518	593	440	565	735	1195	843	939	908	1277	1021	822	793	593	745	797	832	668	981
209.3	2145	1517	1178	431	1115	896	775	697	1150	697	858	393	349	797	933	538	611	1246	1533	1403	1537	1003	1285	1212	934	798	749	785	707	792	441	648	442	573	565	1228	807	1035	818	1318	994	878	853	629	700	495	833	597	929
211.3	1319	1354	1038	589	1062	898	601	899	1153	679	646	976	359	1055	715	701	748	1602	1619	1312	1419	1188	1366	996	800	875	909	806	634	764	566	716	404	693	588	1202	751	892	898	1274	920	1014	681	568	649	842	842	611	967
213.3	2053	1218	1188	699	1004	1005	687	1040	1236	668	875	588	376	684	773	695	588	1321	1849	1490	1566	1208	1483	1065	982	709	1083	969	782	825	452	772	500	532	630	1161	826	954	993	1106	867	994	754	494	604	650	814	631	937
215.3	1443	1410	1145	571	940	998	743	955	1043	675	871	451	340	1065	521	666	638	1599	1907	1427	1648	1088	1398	1120	1018	1001	883	775	833	822	553	626	568	564	578	1135	829	976	945	1035	867	894	862	674	684	737	1019	578	865
217.3	1542	1506	1288	564	1146	993	730	1100	1098	445	577	416	452	1064	714	520	644	1446	1640	1571	1390	2472	1334	1069	832	959	885	962	772	709	524	599	514	644	556	1207	994	871	933	1462	971	871	949	658	657	541	707	584	941
219.3	1416	1131	1170	740	1035	903	707	788	1056	791	553	444	375	1034	436	579	520	1400	1717	1525	1520	1102	1454	1056	1000	883	864	955	772	837	523	697	571	648	727	1135	878	1007	1044	1076	1134	864	847	619	688	607	732	666	905
221.3	1637	1506	1179	563	1097	912	617	746	1058	582	728	536	418	676	647	575	598	1570	1844	1581	1591	1133	1478	1168	956	827	890	1004	773	806	602	777	488	629	598	1245	706	1030	949	1299	961	890	896	697	606	723	891	583	794
223.3	1492	1324	1179	663	1039	860	775	769	1210	682	528	520	316	1108	731	631	612	1546	1925	1721	1636	1210	1472	1096	1023	812	1016	930	749	832	495	711	715	577	736	1227	940	884	894	1323	917	879	762	502	887	732	854	564	931
225.3	1484	1641	1201	666	1175	986	535	1089	1132	640	895	462	316	697	696	614	711	1633	2129	1613	1544	1339	1763	1283	968	899	930	1046	779	823	525	683	486	720	767	1133	965	956	736	1222	1036	885	677	618	725	598	845	649	866
227.3	1417	1453	1221	526	1088	970	555	999	1083	500	701	1031	378	710	705	497	527	1495	1946	1474	1533	1234	1564	1176	919	881	1030	949	917	742	670	788	533	784	848	1208	1104	1013	833	1250	909	772	858	669	755	642	927	622	775
229.3	1556	1558	1224	480	1070	831	695	819	1055	686	726	353	343	637	535	502	483	1634	3001	1594	1769	1622	1556	1185	1051	913	969	1010	777	751	699	805	674	736	638	1183	1012	1014	906	1384	977	844	622	715	686	466	949	640	875
231.3	1822	1450	1242	651	1032	1036	785	762	1090	631	703	435	374	687	585	481	629	1594	2093	1670	1793	1322	1498	1251	1065	1005	1081	1046	897	981	663	738	650	578	800	1185	801	887	910	1332	881	814	867	569	749	558	1033	704	816
233.3	1343	1334	1061	647	1292	893	597	1042	1070	673	916	480	350	672	527	531	558	1858	1930	1549	1962	1562	1680	1150	1139	959	1071	1089	800	945	626	930	743	792	899	1282	1028	858	807	1328	960	853	893	624	776	742	755	641	717
235.3	1503	1682	1362	641	1031	932	834	1111	1066	635	567	490	423	843	642	419	585	1757	2192	2285	1675	1489	1703	1343	1086	862	1127	1118	849	915	772	967	701	769	808	1279	930	1011	908	1165	1003	984	735	632	675	884	1022	589	873
237.3	1548	1564	1307	863	1071	919	750	949	1139	685	511	438	353	772	800	493	681	1609	2180	1482	1951	1493	1567	1409	1047	882	1041	1179	900	927	536	938	685	745	769	1278	1055	1103	1071	1352	958	848	726	623	826	460	857	694	854
239.3	1683	1714	1422	729	1080	927	725	1129	1134	627	795	445	320	763	764	526	562	2048	2176	1739	2054	1530	1596	1334	977	987	1197	1254	906	959	822	827	690	756	742	1246	1130	1042	965	1229	930	907	695	591	667	733	948	612	723
241.3	1396	1625	1417	686	1062	918	681	1012	1077	617	816	469	308	884	720	532	650	1909	2225	2107	2054	1490	1912	1239	1222	917	1225	1267	942	936	662	948	822	814	918	1262	1035	841	758	1098	1012	792	759	589	668	612	828	639	740
243.3	1433	1697	1339	707	1241	1044	635	928	1022	622	794	581	332	682	467	601	555	1979	2549	1984	1959	1555	1802	1413	1099	1256	1148	1191	969	995	662	921	686	774	934	1313	799	915	824	1276	879	874	828	680	725	588	712	537	876
245.3	2941	1790	1401	828	1196	984	964	931	1268	802	720	421	425	673	672	457	542	1979	2508	1982	2162	1544	1609	1308	1203	1061	1203	1206	1047	999	804	1010	806	830	868	1230	956	997	1007	1187	924	910	723	711	618	577	748	596	805
247.3	1501	1792	1327	711	1216	883	584	905	1054	616	801	447	407	694	805	637	632	2242	2330	2735	2279	1609	1991	1289	1142	1021	1283	1185	1091	1083	1042	1066	754	817	913	1134	906	846	1014	1212	833	914	673	635	702	611	969	487	758
249.3	1553	1899	1304	878	1110	1071	740	1025	1248	765	597	451	386	651	482	477	568	2344	2483	2264	2115	1574	2101	1326	1279	1023	1291	1302	1008	1054	870	1209	826	860	1066	1265	980	1099	918	936	848	920	656	633	704	707	1084	594	791
251.3	1422	2192	1383	810	1107	996	790	1080	1133	674	624	499	393	1011	414	476	570	2342	2731	1840	2300	1732	2093	1453	1253	1226	1342	1232	1166	1189	881	1243	1046	939	851	1315	944	1040	985	1411	977	873	660	612	566	596	889	569	863
253.3	1630	2146	1536	733	1279	916	765	1094	1122	679	830	455	320	640	728	532	583	2399	2587	2235	2009	1895	1985	1582	1420	1134	1376	1273	1057	1159	815	1239	893	905	963	1302	1239	1113	901	1160	802	909	701	654	629	578	899	583	869
255.3	1967	1996	1482	892	1392	1017	762	1025	1094	603	724	667	399	573	635	541	617	2600	2730	2563	2391	1630	1986	1467	1369	1219	1580	1436	1190	1218	988	1275	980	997	1153	1344	834	933	940	1260	1044	841	692	565	674	634	839	576	822
257.3	1698	2097	1606	826	1240	1020	686	1138	1130	592	848	425	401	944	756	508	557	2598	2740	2445	2200	1767	2264	1674	1248	1196	1528	1481	1196	1182	1098	1145	1014	1069	1093	1504	1028	1137	889	1264	873	860	837	734	663	823	806	605	822
259.3	1674	2137	1599	867	1264	1052	810	1143	999	613	664	709	372	690	711	504	558	2623	3215	2590	2431	1894	2100	1496	1432	1158	1488	1537	1268	1215	887	1144	1077	1096	1079	1446	863	1143	870	944	976	828	780	544	756	629	862	547	741
261.3	1696	2158	1540	868	1331	1079	860	1049	1142	638	809	440	342	903	543	499	600	2641	2500	2934	2469	1900	2157	1601	1407	1350	1531	1607	1361	1278	828	1478	953	988	1069	1431	832	1044	788	1299	976	856	706	557	786	541	700	557	741
263.3	1701	2470	1414	972	1344	995	815	1114	1134	681	773	625	316	686	746	523	549	2531	2883	2760	2658	2014	2161	1533	1440	1400	1597	1499	1289	1329	783	1293	1038	979	1176	1477	937	1099	802	973	999	875	801	612	756	669	809	583	949
265.3	2294	2314	1538	927	1366	1119	936	1227	1068	667	954	512	344	675	710	619	590	2708	2849	2238	2517	2132	1685	1568	1437	1267	1688	1493	1280	1393	1147	1379	1108	1049	1260	1668	1303	1218	834	787	962	844	670	614	682	706	885	607	896
267.3	2012	2535	1655	820	1388	1074	814	1289	983	632	749	389	420	642	541	468	503	2949	2973	3101	2761	2116	1980	1561	1568	1344	1676	1551	1346	1224	936	1494	1166	1142	1357	1571	1132	1085	871	1044	926	882	685	657	671	661	995	583	880
269.3	1939	2904	1684	870	1494	1111	1054	1083	1138	665	835	422	315	630	489	595	582	2819	2905	2422	2315	2074	2341	1750	1495	1530	1725	1844	1452	1437	914	1254	1257	1234	1198	1667	991	1152	978	1095	992	980	687	584	733	586	935	578	854
271.3	1887	2549	1719	963	1420	995	1029	1137	1092	797	684	463	374	843	681	519	574	3103	3508	2513	2496	2085	2519	1698	1687	1498	1856	1570	1493	1332	1163	1230	1178	1162	1301	1783	1374	1164	882	1358	997	929	708	506	650	507	845	536	739
273.3	1773	3051	2088	1082	1553	1054	1014	1299	1140	585	768	468	373	824	542	554	603	3393	3047	2577	2645	2118	1994	1689	1680	1506	1820	1631	1546	1308	1465	1587	1144	1125	1435	1880	897	1431	903	1221	946	894	685	553	644	601	688	531	800
275.3	1801	3126	2026	1002	1724	1237	936	1317	1106	671	750	458	351	589	596	507	535	3430	3246	3465	3018	2274	2262	1866	1668	1486	1864	1992	1568	1434	1146	1501	1125	1235	1432	1741	1092	1208	854	1460	928	864	707	656	621	748	706	566	773
277.3	2104	2744	1964	1107	1450	1148	973	1526	1056	747	816	437	364	606	644	456	586	3405	3447	2866	2947	2386	2327	1806	1775	1530	1825	1779	1432	1350	1326	1598	1364	1154	1412	1815	1094	1349	896	1235	957	904	715	594	710	549	742	462	844
279.3	1912	3364	1808	1048	1618	1192	955	1090	1137	720	863	452	398	599	438	713	617	3568	3542	3181	2979	2401	2563	1851	1769	1468	1976	1874	1558	1439	1594	1487	1469	1344	1513	1866	1031	1345	977	1462	864	931	787	716	678	789	887	516	751
281.3	1921	3156	2133	1205	1667	1320	990	1260	1099	665	791	410	349	629	503	373	491	3724	3352	3767	3294	2317	2409	1946	1939	1575	2096	1727	1656	1479	1381	1910	1389	1274	1457	2104	933	1399	942	1425	1053	991	796	696	597	558	798	544	790
283.3	2148	3185	1846	1195	1710	1311	1045	1433	1026	809	807	423	375	663	636	590	604	3753	3362	2707	3046	2280	2643	1999	1758	1658	1756	1939	1548	1632	1583	1648	1246	1229	1330	1985	1018	1560	992	1221	995	966	846	643	405	925	789	533	735
285.3	2231	3191	2032	1140	2159	1396	1030	1363	1140	833	660	496	354	821	570	539	562	3814	3770	3298	3106	2420	2659	1942	1777	1705	1985	1894	1577	1708	1304	1739	1514	1307	1398	2014	1169	1195	1148	1371	1166	1046	718	691	582	689	640	531	748
287.3	2204	3396	2196	1221	1837	1288	1022	1387	1112	796	738	445	442	723	574	573	658	4282	3762	3115	2917	2359	2336	1995	1875	1614	2150	1946	1796	1687	1406	1591	1585	1446	1539	2049	1229	1567	926	1219	1011	959	778	677	651	622	709	586	696
289.3	2612	3657	2244	1197	1785	1316	1189	1351	1103	889	754	456	489	698	577	524	564	4343	3075	2771	3525	2630	2519	2118	2116	1848	2301	1872	1772	1730	1686	1980	1459	1422	1593	2164	1133	1712	937	1243	1147	961	785	800	605	520	865	521	867
291.3	2245	4038	2406	1251	1842	1304	1265	1387	1140	732	728	498	451	600	635	528	587	4180	3781	4350	2946	2819	2532	2186	2054	1765	1889	1911	1625	1950	1097	1802	1598	1497	1615	2218	1308	1494	1078	1195	1104	866	792	713	693	556	837	530	780
293.3	2319	4081	2341	1405	1927	1402	1323	1452	1065	855	829	440	398	606	670	619	619	4424	4059	4216	4020	2641	2386	2127	1980	1861	2079	1949	1848	1849	1323	1867	1578	1470	1685	2300	1497	1495	1026	1442	1156	1086	726	771	701	638	651	552	741
295.3	2388	4246	2586	1352	1975	1236	1281	1489	1146	898	939	555	398	543	529	464	548	4861	3993	3064	3069	2879	2926	2286	2119	1998	2422	2252	2018	1917	1665	2123	1717	1663	1733	2417	1527	1696	1082	1490	1097	921	731	816	791	639	906	579	738
297.3	2546	3875	2441	1425	1931	1357	1428	1535	1189	810	761	500	392	700	621	416	495	4579	4702	4178	3065	2625	2268	2299	1943	2010	2494	2185	2051	2150	1970	2237	1788	1429	1683	2454	1326	2001	895	1328	1168	958	823	631	723	715	866	553	864
299.3	2715	4600	2914	1476	2062	1624	1361	1492	1180	846	782	499	434	680	596	415	525	4993	4551	3942	4144	3240	2956	2327	2229	2059	2591	2403	1903	1817	1763	1985	1492	1682	1682	2321	1263	1691	847	1456	1134	1207	796	694	651	495	859	616	818
301.3	2880	4910	2626	1569	2015	1645	1409	1650	932	974	752	526	433	784	576	632	628	5054	4726	4299	3425	2815	3185	2435	1938	2120	2599	2160	2026	2043	1706	1899	1743	1818	1887	2734	1568	2007	1174	1292	1241	1028	683	722	592	582	861	581	852
303.3	2961	5233	2724	1567	2100	1433	1641	1712	1080	856	738	492	384	607	683	558	526	5137	4432	3650	3752	2695	3056	2531	2202	2175	2587	2270	2021	1937	1754	2123	1654	1578	1592	2537	1371	1702	1061	1301	1160	1079	662	676	623	677	767	557	682
305.3	2940	5038	2894	1602	2280	1565	1564	1643	1186	847	923	477	424	723	417	580	621	5411	3933	4454	3757	2662	2843	2539	2458	2067	2697	2229	2027	1866	1528	1996	1972	1909	1986	2834	1288	2087	1221	1469	1198	1207	661	703	668	694	846	541	824
307.3	3107	5355	3000	1778	2208	1694	1682	1715	1038	950	965	577	398	860	521	381	602	5740	4488	4490	3683	2938	2701	2491	2203	2315	2766	2204	2088	2043	1769	2192	1908	1665	1910	2770	1608	2221	1115	1519	1254	1100	853	774	633	795	910	503	796
309.3	3317	5433	2838	1776	2284	1450	1659	2019	1185	990	857	576	434	596	639	511	633	5193	4359	4245	3654	3336	2222	2772	2355	2183	2391	2483	2293	2145	1956	2227	2142	1803	1836	3241	1621	2257	1107	1389	1340	1083	704	731	668	698	855	631	760
311.3	3508	5460	3140	1885	2424	1741	1719	1794	1262	1039	882	513	401	606	519	628	559	5853	4322	4526	3656	2894	3167	2699	2471	2338	2672	2349	2423	2086	2089	2299	1724	1908	2075	2694	1366	2212	1224	1497	1327	1164	801	744	659	635	735	490	843
313.3	3265	5781	3176	1889	2438	1841	1683	1696	1134	940	933	527	439	819	497	545	574	5795	4780	4535	4396	2686	3255	2753	2494	2338	2875	2531	2401	2210	2174	2095	1811	1777	2308	2993	1847	2410	1100	1496	1367	1187	725	905	667	911	765	599	755
315.3	3403	5618	3498	1798	2521	1683	1741	1909	1193	939	983	498	421	575	610	501	568	6090	4702	4334	4295	3204	3097	2766	2281	2518	2800	2629	2201	1979	2006	2042	1895	1949	2065	3230	1675	2318	1241	1126	1464	1098	814	921	848	882	685	553	777
317.3	4063	6181	3315	2027	2755	1844	1682	1976	1226	1050	811	527	432	852	636	554	657	6192	5399	5090	3905	3123	2638	2742	2469	2367	2596	2441	2203	2291	1299	2067	2330	1973	2033	3635	1953	2931	1296	1523	1608	1224	942	885	664	699	820	520	688
319.3	4099	5824	3114	2012	2562	1802	1772	1939	1257	999	771	565	536	562	798	673	635	6099	5040	3956	4654	3019	3285	2871	2128	2123	3111	2617	2551	2301	1651	2161	2091	2271	2004	3623	1692	2805	1047	1594	1523	1313	864	892	703	630	1004	446	713
321.3	3842	6756	3650	2090	2658	1981	1892	2048	1094	1121	893	533	447	729	602	581	599	6502	4431	3730	3732	3163	3675	3085	2433	2258	2969	2789	2620	2522	1244	2287	1923	1875	2081	3696	1750	3137	1325	1488	1460	1278	689	1037	760	828	741	533	857
323.3	4163	6695	3931	2095	2965	1770	1861	2119	1068	1210	936	576	486	625	569	522	583	6776	4865	5318	3548	3423	3163	3111	2547	2352	3293	2785	2467	2311	1852	2567	2404	2188	2230	3617	1515	2904	1390	1425	1456	1429	822	1012	756	996	852	591	771
325.3	4588	6830	3498	2389	2812	2035	2071	2195	1109	1098	1007	592	472	707	638	444	554	5604	4754	5299	4332	3522	3667	3085	2298	2478	3076	2694	2351	2419	2001	2265	2100	1836	2022	3701	1673	2798	1307	1632	1509	1254	938	810	698	740	773	553	829
327.3	4235	7981	4587	2554	2845	2055	2065	2268	1203	1154	994	606	420	623	662	606	637	7011	5411	5435	3132	3342	3448	3255	2422	2669	3234	2772	2710	2380	1783	2378	2256	2262	2174	3662	2138	3068	1304	1724	1568	1094	822	1042	717	780	776	538	729
329.3	4095	7052	3700	2444	3157	2209	2062	2302	1177	1182	1044	546	435	661	544	604	577	7407	4726	4774	4177	3040	3623	3296	2718	2727	2715	3164	2405	2516	2161	2527	2184	2102	2328	4091	2000	3140	1568	1793	1593	1501	1013	1154	624	747	881	583	843
331.3	4361	8016	3452	2288	3032	2049	2162	2365	1297	1207	1013	660	485	671	654	521	598	7240	4714	5683	4123	3129	3378	3199	2677	2660	2636	2843	2767	2374	2623	2865	2974	2252	2334	3802	1941	3057	1466	1610	1706	1373	876	955	703	798	750	511	833
333.3	4444	6665	3849	2655	3244	2137	2169	2172	1223	1184	1075	804	492	636	594	591	626	7773	5261	5839	4311	3031	3627	3195	2611	2803	3487	2861	2435	2435	2298	2649	2846	2188	2300	4604	2126	2816	1407	1816	1973	1364	841	991	693	772	842	546	890
335.3	4749	8517	4022	2752	3106	2501	2528	2562	1274	1292	1071	654	523	617	616	551	626	7712	5192	5175	4822	3210	3828	3541	2475	2704	3703	2993	2807	2373	2265	2905	2880	2381	2329	4995	2528	3338	1269	1982	1776	1382	934	1111	659	1023	893	539	715
337.3	5165	6998	4329	2731	3338	2412	1996	2455	1340	1306	972	620	576	656	733	712	590	7155	6470	4661	3710	5113	3357	3209	3055	2576	3119	3072	3040	2594	2594	2579	2896	2197	2559	4741	2144	3628	1562	1657	1920	1362	831	1017	790	738	834	561	794
339.3	5093	8180	3935	3017	3523	2519	2707	2384	1368	1341	1139	698	485	691	662	574	635	6883	6262	5770	4904	4831	3882	3664	3633	3053	2892	3003	2872	2530	2568	2470	2979	2644	2315	4854	2111	3866	1503	1813	1876	1570	881	1183	769	838	900	528	865
341.3	5344	7084	4071	3039	3575	2222	2292	2357	1278	1212	1125	640	556	637	582	560	614	7485	4624	6141	4401	3379	4403	3622	3173	3118	3683	3145	2806	2412	2404	3107	2315	2720	2632	4838	2075	3597	1503	1715	1457	1544	971	958	761	770	831	636	759
343.3	4929	8901	4214	3060	3886	2422	2234	2866	1335	1263	1110	680	538	746	695	542	749	8111	6360	6028	4605	3441	2946	3671	3047	3004	3757	3057	3135	2569	2894	2910	2314	2763	2464	4401	2151	4021	1499	1753	2041	1539	1098	1265	676	781	836	570	768
345.3	5701	8913	4994	3087	3601	2629	2474	2962	1330	1429	1096	655	482	637	648	587	629	8465	5222	6369	4753	3567	2957	3674	3089	2921	3851	3177	3117	2683	2088	2684	2638	2148	2757	5267	2483	3995	1424	1795	2153	1590	969	1240	712	876	947	558	828
347.3	6018	9953	4548	3225	3573	2649	2528	2714	1383	1507	1101	709	527	712	739	598	657	8431	5932	5818	5527	3575	2988	3788	3728	2644	3825	2967	3135	2517	3173	2703	3145	2283	2313	4831	2377	4018	1576	2077	2187	1626	1135	1103	759	871	860	566	797
349.3	5393	8359	4486	3242	3780	2911	3032	3065	1440	1563	1217	705	517	712	603	560	649	6459	5172	5321	4200	3733	3061	3882	2704	3322	3375	3008	3337	2464	1962	2976	3114	2376	2613	5041	2446	4069	1747	1906	2162	1543	1070	1266	925	791	1001	543	738
351.3	4431	9359	4748	2621	4060	2780	2730	2880	1310	1374	1186	759	564	537	845	606	662	7957	6350	5885	4981	4284	3743	3488	4070	3197	3612	3051	3451	2403	1931	2767	3390	2698	2835	4462	2303	4403	1676	2024	2090	1607	1005	1208	788	826	806	524	754
353.3	5101	10386	4829	3114	4155	2886	2508	2906	1359	1424	1274	723	567	731	611	521	625	7214	5903	6364	5218	3374	3652	3590	3008	3410	3973	3221	3362	2532	3188	3157	3169	2765	2614	5432	2794	4063	1628	1687	2251	1697	1027	1267	719	909	811	534	737
355.3	6617	10049	5743	3377	4255	2966	3254	3149	1362	1631	1238	704	606	747	672	575	680	8766	6108	6921	4770	4616	3096	3830	3651	3536	3535	3452	3251	2807	2655	3606	3031	2495	2810	6340	2803	4679	1724	2104	2426	1552	1088	1475	779	1068	990	604	854
357.3	6625	10768	5303	3890	3996	3151	3424	2781	1354	1706	1246	766	482	731	707	552	655	7981	6801	6278	3973	5391	3698	4206	2754	3175	3818	3455	3437	2774	3138	2854	3494	2408	2797	5904	3095	4615	1791	2233	2401	1778	1052	1411	750	813	859	613	781
359.3	6722	9448	5173	3381	4253	3215	2881	3306	1539	1639	1269	708	534	751	568	698	717	9303	6552	6561	4679	5777	4168	4317	3590	3348	4018	3184	3142	2975	1915	3526	2513	2360	3199	6080	2880	5085	1847	2170	2328	1808	1100	1458	827	1039	894	542	723
361.3	6756	10585	4885	3912	4250	2985	3093	3417	1486	1490	1273	712	604	689	641	636	784	9581	5595	6313	5448	4085	3121	4172	3613	3590	4143	3660	3342	2753	1839	3035	2958	2576	2931	5893	2625	4641	1947	2422	1901	1865	1255	1370	898	1098	990	477	742
363.3	7280	9743	5356	3968	4230	3459	3213	3496	1501	1661	1365	787	631	801	564	704	751	7491	6533	5392	5043	3983	4332	4063	3368	3654	4312	3534	3461	2473	2677	3121	3353	2439	3333	6235	3032	4998	1821	2223	2623	1703	1106	1237	851	1001	1074	552	748
365.3	5086	10942	5451	3667	4426	3593	2995	3229	1625	1589	1346	733	682	779	570	620	786	9985	6220	6519	5187	3841	3542	4365	3206	3719	4271	3408	3061	3613	1951	2851	3325	2586	2999	6704	3293	4920	2066	2183	2720	1839	1151	1496	751	882	900	457	837
367.3	7187	11334	5634	3987	5311	3945	3725	3384	1542	1865	1565	848	594	945	725	776	819	10174	6711	7759	5626	3755	4255	4079	3628	3781	4030	3719	3750	2709	2755	3018	3108	2473	3047	6030	3189	5451	2131	2146	2762	1669	1258	1423	924	1003	921	555	825
369.3	7655	11014	5061	4137	4718	3539	3330	3468	1618	1909	1342	763	698	693	685	803	815	10423	6212	6940	4207	4176	3818	4180	4138	4011	4066	3557	3329	3375	2881	3115	3087	2719	3047	7240	3232	5238	2005	2510	3088	1877	1279	1742	794	1091	969	508	816
371.3	8271	10691	5412	3845	4623	3593	3509	3642	1559	1979	1400	802	706	860	706	601	779	10486	7610	7502	4186	4552	3945	4543	3184	3932	4469	3712	3848	3420	1913	3061	3282	2863	3187	7155	3434	5963	2289	2348	2832	2098	1388	1521	895	1013	1045	601	830
373.3	8295	12011	5151	4380	5092	3993	3766	3575	1697	1900	1460	902	602	728	727	632	769	9572	6015	7260	4545	4816	3632	4370	3434	3945	3700	3409	3536	3412	2839	2933	3349	3028	3403	7212	3149	6140	2132	2320	2938	1822	1433	1547	936	1179	889	365	774
375.3	8399	11911	5302	4102	5274	3498	3988	3826	1630	1777	1603	836	770	792	665	621	778	9311	6900	4999	4340	6452	4348	4707	3250	3746	4607	3462	3955	3893	2831	3269	3405	2587	3091	7404	3732	6044	2447	2540	3129	2166	1512	1695	879	1102	1054	471	860
377.3	6701	11365	6094	4072	5541	4113	3476	3529	1692	2007	1597	1318	700	738	558	802	788	10997	6400	7147	5502	4129	4046	4294	4111	3967	4220	3699	3630	3642	3221	2983	3906	3317	2945	6078	3839	6243	2242	2560	2683	1940	1440	1670	921	989	1019	575	903
379.3	9024	11968	6100	4909	5020	3465	3242	3713	1660	1961	1457	793	653	779	841	741	780	9908	7024	6451	5051	4470	4566	4433	4562	3436	4772	3450	3636	3420	3405	4152	3272	2844	3462	7604	3495	5938	2549	2662	2964	2089	1508	1812	961	944	973	529	747
381.3	9150	12607	6986	5194	5582	3616	4070	3641	1702	2048	1624	941	665	826	634	853	898	10997	7408	5485	5802	4111	4931	4833	3410	4360	4812	3802	3412	4005	2448	3129	3609	3414	3699	7498	3514	6191	2408	2865	3341	2243	1442	1440	918	1265	1117	572	740
383.3	8968	11135	6805	4529	5478	3723	3525	3965	1789	2285	2184	981	741	774	693	612	824	10839	6510	5994	6614	5023	3993	4851	4113	4021	3456	3510	3191	3047	2175	3366	3555	3094	2910	6580	3752	5988	2559	2771	3182	2255	1518	2059	843	1059	1044	475	810
385.3	7992	13148	6271	4714	5322	4362	4415	4216	1813	1905	3943	938	828	901	695	854	779	9796	6976	6896	6865	4061	4304	5006	4345	4268	3477	3645	3161	3506	2610	3383	3253	2890	3622	7375	4065	6509	2590	2854	3409	2311	1622	1904	955	1143	1127	591	799
387.3	9872	10653	6391	5239	5892	3931	4257	4116	1642	1941	1819	887	840	810	763	668	967	10403	7955	7720	5008	4081	3745	4921	2816	3660	4781	3857	4316	3701	2898	3521	2961	3403	3219	8423	3945	6675	2663	2753	3522	2086	1572	1923	804	1288	1127	463	938
389.3	7798	13916	6844	5448	5434	4510	4008	4075	1877	2279	1673	1039	728	851	803	685	897	10510	7690	7608	5323	4282	4842	5220	3359	4638	4344	3704	4000	3433	3794	3717	4328	2976	3354	7388	4668	6895	2732	2821	3586	2233	1614	1842	1000	1216	1090	541	896
391.3	7772	15034	6481	4652	5759	3943	5075	4569	1730	2001	1676	874	713	782	707	700	929	11647	7737	6990	5536	4413	4956	5252	3408	4474	5050	3757	3877	3033	3496	3465	3591	3403	3433	8149	4127	7293	2811	3097	3652	2452	1642	1748	979	1250	1083	528	791
393.3	10680	13999	7444	5532	5955	4495	4909	3832	1845	2494	1794	963	750	898	730	730	867	9936	7622	8418	5955	4394	3782	5363	3820	3803	4641	4206	3982	3655	3566	4104	3276	3277	3500	7974	4371	6451	3032	2899	3512	2267	1642	2054	938	1216	1156	555	888
395.3	10573	11650	6655	4808	5806	4339	5244	4424	1819	2403	1797	1047	878	855	551	765	860	12070	8078	6679	5500	5223	4908	5429	3276	3998	4404	4167	3808	3511	3461	3552	3800	3841	3567	8812	4549	6985	2798	3360	3649	2420	1674	2087	917	1261	1173	552	835
397.3	10903	12954	7079	5735	6126	4292	4581	4543	2014	2348	1737	902	755	965	606	734	959	10317	7697	6960	6625	4308	4786	5183	5261	4734	5156	4146	4673	3815	3034	3927	3245	2886	3606	7757	4708	7263	2848	3333	3779	2251	1858	1998	1005	1284	1128	578	791
399.3	10173	15590	6843	5939	6257	4981	4954	4746	1896	2723	3133	1065	825	882	657	874	1076	11764	6564	8253	5480	5250	4642	5370	3658	4463	4194	4185	4298	3573	3629	3830	3783	3238	3245	8014	4586	7345	2991	3175	3756	2543	1703	1795	1104	1322	1165	507	874
401.3	11083	14657	6262	5102	5566	4991	4845	5296	1976	2690	1973	1345	872	897	768	879	1035	10463	7627	7054	5428	7223	4419	5240	3886	4775	5324	4418	3757	3506	3016	3758	3795	3725	3228	8863	4640	7773	3224	3268	3750	2540	1721	2062	1008	1516	1089	551	803
403.3	11180	13922	6459	5412	6974	4926	4576	4674	1931	2522	1894	1226	909	971	746	834	970	12805	6759	7984	5165	4467	4057	5132	3705	3925	5270	4272	3900	3199	3688	3739	3653	3504	3710	9042	5114	7806	3337	3400	4012	2544	1902	2396	1050	1230	1247	611	783
405.3	11791	12745	8722	6212	5926	5084	4647	4604	2090	2578	2039	1201	924	999	861	1076	1045	12671	9165	7789	4942	5565	3986	5351	3923	4893	4659	3951	4680	3419	4082	4878	3338	3449	3662	7724	4911	7715	3392	3402	4006	2396	1856	2257	909	1400	1191	617	724
407.3	11328	16108	8146	6407	6276	4889	5558	4389	1954	2698	1974	1327	904	860	766	772	959	12495	7557	8171	4834	4719	4614	5503	3724	4825	4850	4369	4142	3789	3095	3915	3425	3914	4037	8625	5176	8520	3433	3682	4322	2522	1900	2323	1018	1463	1278	511	699
409.3	12134	14046	8705	5910	6953	5358	4769	4966	2272	2655	2006	1249	948	921	835	992	1040	10164	8219	6304	5365	4606	5207	5230	3783	5152	4415	4081	4483	3508	2933	4193	3509	3913	3777	10155	4741	7908	3544	3367	4036	2536	1979	2403	1243	1501	1227	638	794
411.3	12071	16259	7076	5893	6314	5311	5401	5405	2287	3017	2207	1307	1040	1005	871	854	965	12368	8169	6714	5814	5052	5676	5536	3549	4996	3734	4011	4152	4678	3094	4625	4464	3181	4263	8843	5745	7696	3512	3742	4257	2599	2017	2492	1048	1319	1350	610	769
413.3	12657	15229	7990	6270	6339	4928	4992	5303	2250	2748	2087	1541	1082	1007	604	864	1100	11130	8374	8239	6529	4981	4050	5836	4695	4185	5409	4018	3380	3341	2618	3853	4935	3766	3861	8723	5268	8369	3655	3642	4082	2527	2036	2491	1145	1443	1334	578	904
415.3	10599	13256	7787	7007	7354	6256	5831	5394	2301	3045	3140	1310	967	1024	779	881	1053	13259	7189	7655	5266	5624	4607	5727	3798	4638	4645	4300	3626	4898	3406	4873	3877	3904	3935	10388	5796	8708	3963	3976	4436	2790	2214	2469	1205	1488	1349	591	842
417.3	12201	15164	8201	6756	6556	5861	6121	4757	2125	2881	2058	1279	1077	998	702	921	1243	11760	8244	8135	6921	4508	4752	5733	4016	5049	5821	4170	4725	4552	3852	3515	5108	3877	3756	9960	5267	8831	3609	3788	4622	2660	2007	2647	1135	1669	1283	633	794
419.3	13205	17199	7531	6854	7079	5711	4920	5233	2319	3185	2299	1602	1035	1018	851	1087	1157	14249	9460	7993	5341	4647	4585	5417	3590	5368	4425	4451	4328	3841	3970	3919	5339	3855	3619	10129	6343	8585	3884	4070	4581	2646	1912	2720	1264	1521	1395	544	796
421.3	9984	18109	8437	6597	7136	5730	5365	5790	2021	2695	2879	1342	1168	1033	734	983	1112	12141	8127	9267	5386	5317	4751	6296	4872	3803	4050	4396	4883	4989	3119	3712	5601	3304	4337	10065	5779	8786	3848	4063	4492	3048	2187	2560	1155	1659	1242	642	800
423.3	12714	14062	7534	7245	6486	6178	6469	6071	2413	3233	4112	1342	1116	1142	945	916	1070	13600	8360	8196	6279	7521	4322	6297	3966	5573	5609	4556	4605	4778	3727	3912	3833	3747	3841	8107	6122	9198	3867	3920	4670	2853	2281	2832	1213	1682	1387	592	892
425.3	13326	16265	9071	7136	6669	5750	5060	5055	2456	2828	4098	1530	1054	1218	805	901	1170	12797	7408	9566	6407	7318	5089	5971	5428	5474	5756	4351	4680	4043	3577	4080	4282	3491	3842	9816	6430	9166	4322	4152	4386	3094	2255	2538	1240	1550	1394	666	811
427.3	13153	16628	9075	7460	6807	5956	5232	5905	2235	3415	3034	1755	1009	1161	789	896	1095	12485	7968	9012	6582	4775	5283	6184	3824	5715	5742	4272	4693	3982	4344	4072	3671	4499	3919	9568	6440	8865	3984	4327	4769	2851	2134	2954	1113	1652	1221	567	782
429.3	13040	18440	7114	7577	6997	5331	5064	5548	2732	3283	2510	1465	1207	1231	800	1079	1066	14431	7985	7313	8178	6980	4745	6168	4814	5573	4612	4259	4447	4575	3638	4575	5327	4463	4145	10646	6590	9180	4188	4157	4827	3071	2324	2909	1243	1703	1428	660	789
431.3	11805	18180	9195	7367	7724	5972	7125	6038	2650	3697	2724	1633	1171	1250	734	1138	1156	14938	8689	8251	6057	5469	4672	6375	5218	5477	5666	4226	5027	3627	3462	3850	4483	3793	3966	10757	6387	9630	3862	4351	4999	3426	2531	2790	1261	1716	1674	651	703
433.3	15084	16012	7436	6706	7934	7395	6378	5216	2727	3213	2504	1671	1234	1142	818	1021	1285	14784	8242	6996	5666	5994	4113	6451	4813	4694	5756	4701	4950	4994	3782	4998	4563	4021	3564	11564	6491	9757	4017	4438	4871	3281	2573	2732	1319	1767	1484	614	770
435.3	14777	16620	8432	7957	7888	6138	5641	5744	2635	3395	2543	1896	1210	1135	871	1282	1226	15059	9300	9361	7396	6911	4434	6447	4312	4193	5876	4953	4328	4579	2283	4016	3884	4643	4742	9996	6028	9940	4459	4476	5162	3149	2395	2767	1310	1702	1428	719	819
437.3	12762	18192	7834	7398	7448	6836	6617	5688	2740	3334	2499	1689	1368	1197	844	1060	1220	15687	9252	7370	6572	4965	4274	6481	4511	4804	6130	4994	5224	3821	3894	5264	4373	3603	3842	10646	7058	10087	4419	4324	5021	3353	2374	3184	1342	1851	1443	645	848
439.3	14928	19146	9024	7945	6963	6874	6002	5392	2699	2907	2752	1467	1370	1179	882	1234	1424	15553	9011	9555	5891	5146	4468	6469	4675	3992	6105	4801	5040	4625	5007	4736	4191	3894	4101	11628	7221	9659	4767	4523	5165	3215	2556	2887	1473	1843	1494	528	869
441.3	15450	18395	8837	8385	6929	6959	7295	6138	2698	3431	2844	1885	1375	1257	937	1387	1272	12807	8563	9004	7603	4830	5572	6756	4626	4364	5509	5123	5391	3807	3158	4522	4682	4072	4491	12144	7375	9761	4649	4597	5082	3198	2476	2919	1475	1629	1574	681	817
443.3	9894	18927	9984	8439	7514	6787	6545	5448	2832	3948	2797	1552	1276	1299	955	1145	1360	13876	8569	9005	6272	8543	5086	6600	5823	4777	6078	4459	4392	4649	4001	4269	5906	5016	4041	12244	7260	10013	4707	4518	5074	3395	2454	2646	1422	2241	1555	622	861
445.3	15666	19740	9933	7833	7839	6244	5987	5633	2809	3974	2672	1855	1415	1254	969	1314	1278	14249	8360	9958	6931	8630	5199	6861	4524	5911	6120	4944	5135	4590	3537	5047	4885	4245	4321	10123	7500	10739	4898	4747	5123	3517	2482	3166	1410	1644	1406	668	812
447.3	14674	18734	8999	8116	7653	7475	7412	6368	2861	3532	3072	1732	1395	1386	778	1138	1268	15991	9174	8749	6401	7799	4466	6824	4850	5844	5210	4831	5249	5426	4059	4222	5144	3809	4135	12556	7573	10496	5134	3965	5220	3528	2688	3153	1411	1752	1622	683	794
449.3	16280	18194	8564	7588	7999	6749	6128	6593	2960	3684	2909	1838	1515	1368	821	1304	1536	13521	9503	8844	6283	5915	5573	6746	4850	5960	5706	4965	4852	5201	4547	5773	4677	4831	3960	12672	6411	11115	4964	4916	5195	3416	2707	2848	1557	2010	1644	631	842
451.3	15400	19720	10710	7724	8240	7883	8524	6991	2802	4062	3281	1579	1346	1363	858	1132	1377	16245	8023	9428	5507	7463	3882	6594	3796	6011	6202	5032	5388	4982	2231	3836	5495	4971	4684	10471	7857	10654	4983	4619	5217	3570	2804	3086	1601	1755	1651	820	835
453.3	16517	19669	9333	8147	7697	7260	6234	7183	2881	4218	3088	1706	1483	1297	951	1286	1365	12582	8275	7840	7292	5991	4701	6598	4472	5546	6425	4626	5542	5853	4064	4299	4002	3947	4566	12654	6767	10782	5310	4971	5590	3318	2924	3362	1484	1837	1723	642	770
455.3	17164	20649	9527	8417	8626	8268	6438	6206	2980	3751	4917	2142	1614	1482	840	1258	1339	13500	10165	9264	6876	5022	5271	6836	4883	6442	4644	5233	5724	5449	4852	4401	5753	4097	4512	10670	7999	10887	5492	5261	5156	3514	2252	3432	1539	2168	1734	659	859
457.3	17338	18612	9952	7909	7928	8711	6511	7626	3069	4255	3212	2110	1634	1376	1038	1330	1316	14127	8422	8979	7511	8384	5243	6214	4619	6213	5795	4818	5810	4675	3474	4567	5691	4332	4916	9481	8091	10723	5295	4889	5635	3620	3118	3570	1556	1891	1685	733	875
459.3	15998	20885	9760	9233	7938	8762	6170	8149	2801	4305	4131	1951	1651	1376	972	1340	1403	14678	8810	7874	7086	5141	4348	7021	4244	4818	6383	5117	5454	3902	4722	5577	4593	4972	4319	13135	8059	11054	5335	5151	5676	3561	2662	3474	1704	1856	1708	655	891
461.3	17606	22759	8637	8454	7860	8614	7822	7398	2851	4093	3410	1921	1557	1473	1050	1341	1592	15056	9501	7233	7447	8100	5546	6347	4377	4350	6447	5182	5757	4884	4313	4878	5650	5386	4674	11360	8280	11770	5523	5088	5708	3551	3119	3676	1579	1937	1765	686	920
463.3	17935	19710	10487	7593	8589	9017	6421	5855	3728	3986	3342	2217	1591	1609	1082	1398	1575	14625	9159	11050	7065	5090	6324	7390	4439	6132	5336	5144	5941	4845	4125	4839	5483	4051	4605	13454	8269	11073	5511	5317	5932	3981	3070	3696	1530	2232	1733	761	773
465.3	18082	20871	8858	8791	8205	7573	7517	6247	3175	4718	3269	1956	1734	1464	1053	1473	1643	17155	9270	8217	7161	6323	5646	7017	6558	6394	6625	5076	5795	5805	2795	4846	5702	4541	4773	12981	7761	11199	5626	5211	5868	3803	3158	3444	1608	1921	1756	713	860
467.3	12918	22442	9004	8992	9038	8446	8716	8359	3733	4133	4340	2254	1684	1622	956	1496	1614	14983	8198	8275	7468	8437	6638	6234	4687	6474	5035	5123	5530	4889	4734	4142	6293	4167	4347	13283	8159	12423	5762	5492	5928	3087	3058	3313	1715	2023	1863	779	865
469.3	18782	22075	11389	9628	8608	7883	8545	7503	3654	3832	3608	1991	1890	1549	982	1321	1347	16922	8643	9363	6167	5385	4956	7441	4212	5013	6666	5057	5178	5311	4511	4633	5293	4687	4499	12988	7971	11401	6112	5476	5324	3685	3187	3584	1690	1971	1824	637	934
471.3	18361	19518	8625	8288	8830	7828	6997	6972	3681	4424	4134	1803	1613	1678	1061	1485	1683	16610	9175	7909	7173	5389	5498	7484	4684	6296	5255	5210	5691	5826	4548	5374	4456	4094	4030	13225	7272	11366	6039	5384	6266	3722	3383	3837	1792	1993	1884	741	827
473.3	18755	22371	10643	8441	9411	7662	7870	6790	3500	3807	3593	2105	1943	1725	1006	1585	1583	17785	9616	8566	6457	5764	5798	7236	4188	4922	6774	5365	5936	5533	4497	6626	4960	4350	4948	13332	8775	11634	5801	5750	6106	3858	3268	3908	1529	2244	1847	731	854
475.3	18319	23410	10670	8025	9501	7744	7837	7687	3865	5291	3541	2443	1920	1624	1159	1318	1617	17363	9112	8849	6814	6076	4828	7382	4533	5248	6886	5025	5091	5178	5336	4755	4781	5162	4747	13866	6650	11679	6015	6214	5967	4025	2909	3674	1814	2083	2091	817	852
477.3	18861	20149	9829	9012	9197	8417	6369	7894	3212	4379	4257	2488	1872	1667	1107	1578	1632	17056	8380	7943	6621	5510	4893	7554	4974	6698	5101	5010	5762	5223	4059	4550	6505	4591	4810	11595	7593	10948	6060	5832	6244	3913	3157	3909	1891	2272	1927	692	863
479.3	19056	23584	11177	9654	8837	8070	7000	7344	3747	3991	3674	2628	2120	1820	1144	1451	1751	15774	9664	11087	6304	7307	4433	6738	4720	5568	5833	4988	4752	5896	3388	5298	6047	4288	5236	14150	9014	11890	6149	5637	6145	3359	3265	3878	1880	2271	1934	790	948
481.3	19479	21466	10343	9585	9169	9078	7365	8711	3778	5035	3920	2525	1967	1751	1199	1718	2032	18384	9262	9555	7999	7782	4832	7806	5149	4768	5251	5166	5571	5069	4031	5556	6127	4099	4993	14310	7830	12285	6420	5754	6146	3972	3241	3393	1977	2677	2000	801	821
483.3	20377	22679	10540	10141	9552	9650	8020	8559	4054	5350	3909	2852	1883	1817	1247	1696	1562	17805	7581	9814	8852	6448	5167	7637	5863	6731	6707	5227	5079	6270	3703	4731	5446	5202	4845	10809	9218	11518	6323	5969	6215	4421	3469	3875	1834	2480	2139	690	873
485.3	17407	22750	11283	7581	9477	7624	7408	7038	4229	5490	4219	2861	2107	1822	959	1721	1739	17880	11214	9403	6106	9007	5654	5301	5636	5154	6545	5640	5942	5951	4680	5034	5156	4489	4835	11217	8101	12315	6425	5898	6234	4356	3575	3878	1970	2735	2038	790	821
487.3	20465	23204	11534	8308	9567	8250	7831	8681	4198	4986	3961	2511	2010	1874	1078	1687	1993	17694	10007	9387	8443	5509	3919	7695	7074	4982	7170	5345	5857	6521	3137	5297	5326	5744	4456	14447	7438	11911	6533	6295	6564	4181	3735	4026	1929	2456	2118	805	861
489.3	19885	17872	9716	10815	9237	7952	8786	9502	4260	5010	4029	2668	2264	1922	1078	1655	1819	17777	11891	9839	9431	9075	5691	7959	7323	5818	4824	5567	5981	6268	5165	4837	4524	5110	4958	15117	8863	11036	6687	6105	6048	3719	3652	3798	1940	2018	2108	788	915
491.3	19883	24350	9717	10172	8214	10062	8745	6838	3581	4515	4009	2971	2244	1925	1263	1717	2007	18557	10787	9211	8302	8483	6158	7795	5003	6735	7024	5239	6283	6538	5915	5080	6026	4985	4896	14964	9179	11426	6646	6224	6448	4440	3564	4143	1876	2335	1831	799	919
493.3	18009	24245	11327	9550	9618	8982	10014	8083	4417	4629	4736	2731	2140	1889	1253	1619	1940	18179	10737	7895	9035	5936	5887	7841	4775	5848	7310	5388	4531	5416	4229	5402	5138	4697	5244	14313	7510	11425	7006	5953	6653	4034	3708	4264	1902	2647	2113	766	963
495.3	20205	23156	9735	9743	8320	10380	8137	6671	4056	5346	4457	2687	2383	1973	1362	1599	1786	16686	9162	10191	7000	5565	5404	7706	4688	6380	6792	5382	4681	4775	5275	5103	5999	5359	5021	14119	7662	13404	6727	5982	6455	4261	3861	3407	1889	2250	2243	859	918
497.3	20536	22711	9428	9710	9391	10218	9177	9349	4067	4734	4287	2745	2447	2004	1262	1711	1751	18911	10221	8560	8982	9830	6853	8016	4597	6266	7280	5797	6541	6435	3415	5673	6968	4423	4669	15561	9066	12638	6948	6380	6599	3830	3703	4053	2014	2498	2136	883	909
499.3	16217	22573	10375	10856	9477	11295	7181	7655	3578	5810	4404	2969	2209	2083	1342	1749	2123	17851	8869	9829	7911	7043	5376	7761	6171	6216	6057	5588	5463	5791	3421	5325	7583	4381	5418	14105	8820	12928	6500	6374	6731	4354	3592	4193	2131	2551	2270	967	944
501.3	15050	24732	10692	10211	10097	10162	7379	9566	4884	5785	4480	2776	2358	1930	1364	1657	1884	16826	10685	9806	8031	6637	6677	8229	5068	7195	7365	5530	6465	6610	4850	5826	6300	4521	5526	14699	7670	12658	7323	6352	6575	4580	3926	4188	2133	2479	2193	858	957
503.3	22695	22411	13506	9066	10846	8228	9579	9586	4392	4770	4425	2598	2393	2137	1108	1924	2457	16761	10959	10620	7601	5635	5389	8185	5668	5420	5664	5412	5079	6632	5003	6594	6518	4721	5615	14104	8353	14141	6585	6437	6621	4633	3921	4378	1896	2553	2329	853	926
505.3	21815	20167	12005	10669	10166	11294	9248	9269	4324	4443	4520	2520	2341	2222	1257	1961	2157	19553	11300	10395	8206	5795	6456	7519	5460	5525	6258	6098	5025	6975	4245	6795	6455	4817	5824	14243	9569	13742	7190	6508	6936	4225	4168	4012	2209	2833	2479	907	948
507.3	20928	18656	13045	10700	9990	9466	7273	9678	4231	4892	4645	3393	2593	2233	1373	1740	2058	19529	9704	10676	7568	9124	6425	7592	5634	6922	5833	5814	6355	5991	3494	6221	7015	4553	5466	11885	8148	13290	7019	6562	6914	4701	3904	4267	2202	2485	2256	829	1005
509.3	15540	26182	12448	10978	10309	9636	9132	10220	4073	5111	4620	3262	2814	2174	1355	1987	1824	13430	9202	10827	6360	9547	5174	8378	5367	7429	7649	5922	4999	6545	5487	5913	5279	5307	5290	15639	10334	13517	6956	6499	6878	4007	3840	4414	2293	2475	2183	850	928
511.3	19751	25152	13063	11571	9063	10062	7952	7866	4606	5502	4769	3381	2806	2408	1455	2107	2060	17758	11180	10705	6076	10001	7206	8456	4985	7344	5991	6357	5133	4671	4982	5697	5356	5921	5512	16088	9624	13727	7641	6267	7158	4016	4080	4263	2272	2645	2413	900	1021
513.3	20981	21918	9655	10376	9742	9631	8571	7936	4639	6397	4884	3377	2487	2346	1614	2238	2486	16770	11130	9347	6087	6949	5739	8254	6716	7258	7479	6277	5530	6693	5480	5307	7545	4797	6020	16028	9986	13545	7609	6104	6985	4530	4092	3856	1991	2798	2421	952	957
515.3	22277	23643	11964	11679	9332	8260	9169	10138	5121	5398	4696	3516	2519	2244	1398	2098	2574	19335	9515	9413	7141	5555	6430	8661	6497	5745	5066	5621	6788	6583	5892	5229	4831	4919	5725	15547	10599	13714	7861	6406	7456	5159	4145	4544	2278	2588	2271	969	1038
517.3	22474	25637	13024	11460	10432	11487	8392	8358	4686	6823	4697	3024	2758	2404	1421	2060	1966	19570	11498	9735	8716	7197	6492	8168	7943	5509	7548	5470	6459	5420	3801	5360	7560	5863	6171	15695	10606	13470	8046	6855	7456	4035	4113	4693	2425	2667	2414	884	959
519.3	19391	25365	13005	10105	8769	10466	10258	7736	4990	5955	4759	3640	2956	2326	1525	1863	2425	19436	10895	11119	6789	10304	6258	8537	6587	5010	7079	6164	6216	6970	5946	5062	5373	5841	5604	16566	10919	13818	7863	6696	7380	4112	4209	4589	2467	2935	2645	977	922
521.3	23719	24254	12381	10801	11053	9901	8827	10705	4763	6750	5380	3554	2747	2380	1485	2057	2326	20091	12405	9621	6963	6432	5570	8803	6787	5861	7655	5401	6025	6975	4262	6264	7657	5939	5564	15929	8884	13346	7774	6856	7088	4859	4062	4827	2331	2584	2449	952	1025
523.3	15350	24756	11634	11490	11114	9473	10158	9925	4974	7044	5314	3532	2623	2486	1620	2071	2055	13885	12084	11030	7403	8087	5060	8419	5530	5895	7843	5547	6179	5863	5955	7265	5158	4785	5057	16760	10296	13742	8146	6900	6980	4569	4345	4603	2374	2731	2532	925	1057
525.3	22499	25775	13394	10440	10471	10017	8027	7856	4947	6449	5176	3993	3214	2582	1545	2576	2549	20164	13621	12228	7102	7273	7337	8510	5947	7497	7328	6174	4678	5893	5133	6631	5093	4965	5715	15714	9181	12958	7924	6607	7174	4814	4380	4332	2421	2708	2438	992	990
527.3	20034	27864	13379	11750	10181	9435	9999	8568	4294	6345	5048	2953	3167	2598	1541	2160	2302	20382	10761	11962	8184	5817	5988	8321	5737	7799	6352	6260	5922	7011	5478	5272	7901	6384	5423	14207	10884	13275	8122	6990	7407	4657	4643	4892	2432	3155	2491	1023	1048
529.3	23402	28236	12370	12096	10065	10060	9110	10689	5201	5218	5423	3820	3141	2564	1735	2261	2130	20538	11084	9000	10181	8408	5588	9056	5099	5834	6518	6234	6955	5317	5421	7803	7310	4660	5711	16223	11239	14853	8257	7321	7678	5152	4383	4972	2400	2847	2536	1036	1153
531.3	22741	25895	12553	11895	11361	10304	10119	9054	5375	6238	5512	4063	2914	2701	1568	2444	2806	20627	10822	12191	6626	6110	5611	8884	6424	5549	7122	6317	5304	6853	2887	5772	5251	5885	5497	14739	10905	12722	8386	6906	5890	5472	4615	4968	2380	3173	2491	985	993
533.3	24783	22491	12960	10711	9755	9949	9490	8504	4972	5665	5630	4158	3065	2712	1650	2264	2849	19247	10297	11421	9606	5749	5947	8892	6184	7832	7508	6143	6159	4568	6020	6474	5593	6290	6333	17020	10771	13914	8394	7204	7584	4049	4292	4537	2526	3235	2383	953	1121
535.3	24849	21388	12678	12093	12033	10462	8947	8288	4980	7581	5129	3772	2801	2601	1646	2193	2753	20710	9992	10483	7260	6114	4440	8747	5547	7848	7511	6106	5937	7076	4330	6150	7311	5266	5582	13793	10410	12802	8704	7461	7419	5466	4321	4858	2410	2726	2596	1093	1007
537.3	24125	22151	13349	11724	9981	12639	8646	8141	5637	6237	5165	4054	2783	2875	1735	2473	2745	20816	9834	10738	8152	6099	6071	8961	6137	7585	7458	6165	6413	6863	4957	6015	6958	5027	6538	16646	10459	14773	7890	6983	6863	4092	4489	4710	2419	2710	2633	1027	1130
539.3	22699	29480	12213	11602	10203	11589	10026	8553	5438	6481	6523	3006	3574	2746	1628	2356	2538	18165	10323	10140	6258	5842	4658	8460	5805	6178	7718	5698	6724	6204	5103	5037	7965	5552	5253	15155	10897	14348	8690	7292	7856	4198	4451	4813	2447	3129	2691	1036	1106
541.3	25661	29778	11131	11878	11285	11025	11637	9989	5403	7227	5695	4371	3188	2828	1714	2264	2562	18041	11012	7987	6974	5971	6633	8669	8076	6114	7426	5976	7208	6860	6096	5648	5958	6326	5899	17121	10564	15008	8642	7126	6413	4964	4589	5037	2595	3082	2731	1205	1084
543.3	19396	25203	12608	10967	11407	11626	9597	9935	5812	7298	5740	4505	3084	2827	1835	2591	2412	21134	12200	10416	6259	6030	5961	7536	7475	7977	6511	6609	6014	5253	6238	5577	8022	4769	5247	16889	9183	14246	8297	7109	7789	4624	4760	5010	2621	3252	2708	1078	1070
545.3	25486	28173	12870	12803	12280	12065	8859	10407	4927	7609	5620	4568	3428	2918	1614	2636	2403	21388	11577	11012	9053	9090	6886	8937	7476	6268	6917	5882	6305	5819	4105	5511	5955	5981	5088	16235	10153	12532	8171	7611	7790	5433	4471	4890	2544	2896	2894	1022	1243
547.3	25973	26591	14132	12930	11492	12456	10399	8907	5642	7948	5294	4070	3784	2885	1801	2679	2774	21256	10045	12320	7409	6621	5542	8425	6292	8070	7862	6619	7276	4999	4494	6857	8060	4945	5441	15006	9512	14611	8022	7685	7747	5108	4565	4123	2418	2829	2786	1091	1096
549.3	25832	28457	14366	9800	10350	13611	13588	9184	5479	5655	6051	4751	3338	3090	1685	2462	2286	16297	11502	10225	7211	8738	5624	8413	5430	5819	7356	6257	6197	5604	6031	7389	7382	5305	5900	16681	11395	14157	8861	7799	7895	5388	4529	5131	2569	3093	2601	1077	1242
551.3	25601	20762	12397	10145	11273	14315	9606	8246	5128	8309	5626	4476	3258	3191	1765	2631	2599	20789	9967	11482	8948	6281	4414	8696	6737	7633	7568	5870	5173	4872	3762	6900	5914	5289	5762	17579	11701	15230	9023	6835	8004	4509	4637	5183	2747	3295	2867	1036	1261
553.3	23940	24434	14213	12152	10197	13848	12564	8615	4679	8001	6575	3694	3451	3087	1877	2580	2658	18182	11566	8394	7662	7414	4329	9078	5400	7867	7106	6385	7513	5968	5294	5819	7076	5299	6165	15583	11980	14061	9098	7288	7745	5556	4711	5402	2867	3174	2854	1105	1238
555.3	26265	25929	12001	11750	10580	12399	10913	8271	5482	6716	6178	5040	4029	3228	2011	2806	3138	16949	9643	11218	9479	6490	4680	8607	6559	8401	8174	6256	7606	7418	6559	7078	5992	5741	5840	15562	9554	15035	8452	7592	7878	5559	4057	5297	2418	2863	3018	1178	1209
557.3	25376	25608	12105	10250	10889	11875	9208	9865	5840	7854	6100	4761	3711	3277	1948	2737	3357	21343	11702	10086	8551	8182	5823	9351	6598	6121	8273	6249	7384	5484	4419	6866	7463	5351	5575	15645	12428	15892	9313	7480	7864	4753	4809	5372	2841	3411	3071	1206	1213
559.3	25057	28819	13936	9732	10571	13135	12361	11066	6271	7696	5551	4020	3778	3351	2037	2928	3267	21101	13638	11029	6407	10843	5814	9346	6052	7470	7803	5768	5968	5550	6130	5454	8092	5940	6251	13224	9087	14030	8895	7637	8002	5515	5281	4899	2728	2862	3103	1185	1216
561.3	26695	29757	13713	12281	10811	10941	9548	11062	6505	8113	6277	4664	3340	3436	1767	2978	3393	17624	12924	11061	8247	6029	4569	8700	7898	7733	8167	6536	7453	7473	4201	6386	8465	6484	5264	16556	10399	15172	9553	7467	7860	5491	4869	5265	2893	3186	2969	1119	1170
563.3	26242	27682	11791	12602	11847	13067	8484	10868	6378	6329	6064	4933	4121	3253	2105	2556	3197	17430	13312	12358	7181	9106	4813	9248	8342	8156	8469	6409	6772	7403	3678	6934	6879	6678	5462	17545	11754	16276	8519	7933	7535	5452	4720	5247	2896	3056	2896	1267	1248
565.3	25082	24992	13976	11768	11101	12217	8984	11266	6208	5742	6279	5080	3949	3444	2195	2951	2792	22091	11658	10585	7917	6190	6220	8487	7220	8059	8112	6472	5741	7748	4770	6441	8373	5606	5521	18104	12268	15181	9701	7647	8087	6105	5019	5393	3041	2953	3170	1202	1323
567.3	26819	26245	12567	13504	11798	12541	9460	11302	6567	6063	6305	4584	4210	3494	1991	3051	3417	21492	10209	10923	7263	7646	5251	9574	7962	7708	7744	6889	6426	6579	5527	6213	8446	5539	5470	15814	10323	15038	8947	7879	8170	4846	5121	5421	3002	3367	2620	1191	1267
569.3	20999	26987	12387	11071	11287	11435	9444	8256	5179	7044	6727	5431	3949	3457	1964	3160	3565	19938	12319	10244	8641	6612	5015	9335	6042	8158	7961	6490	7392	6766	5186	5924	8311	5312	6156	17314	9173	15165	9667	7509	8353	6064	5018	5363	2837	3440	3062	1308	1223
571.3	24595	22592	11446	8998	10581	12832	12421	9663	5649	7874	6489	5371	3962	3354	2182	2958	2641	17674	11202	9040	8890	8766	7734	9865	8601	7705	8145	6051	7624	7109	5448	6681	7735	5717	6086	17730	10698	16452	9824	8032	8310	5919	5063	5577	2895	3253	3150	1292	1237
573.3	24165	27699	11783	11367	11302	13509	12094	12019	6726	8374	6513	4944	4149	3320	2204	3414	3068	22036	11062	12936	7573	8782	7035	8745	7820	8388	6805	6098	7632	6336	4134	5959	6246	6755	6354	16543	9647	14616	9942	7113	7435	5530	5017	5585	2798	3484	2973	1226	1301
575.3	28118	31487	12163	13793	11780	11219	9926	9369	7300	6811	6688	4906	4148	3746	1987	3121	3779	17893	11811	13299	8317	6529	5980	8701	7207	6097	7723	6250	7393	5197	6238	5445	6431	5526	6509	17816	11095	16101	9958	8194	7636	5745	5267	5669	3004	3573	2790	1308	1229
577.3	26759	25954	15034	11301	12217	14770	11184	9368	6122	8614	6630	5689	4548	3758	2292	2938	2698	16861	13369	11312	7767	9580	6201	9795	6943	6244	8070	6024	7649	6471	3802	7966	8819	5378	6489	13822	9332	14688	9426	8145	8303	5597	4692	4689	2602	3529	2902	1297	1250
579.3	27003	25835	12672	13356	12361	12842	9194	9772	6896	7928	6959	5766	4028	3631	2189	2937	2993	19232	9594	12724	8328	12263	6113	9999	6215	6237	8092	5860	6970	7651	5478	5823	6349	5507	5849	17189	13267	15025	10124	8092	8146	5005	5135	5577	2596	3098	3016	1320	1388
581.3	27987	23791	12640	12979	13137	11853	8781	10259	6278	7689	7197	3768	4245	3533	2277	3271	3446	21488	11157	9424	8081	9154	6767	9624	7149	5694	6782	6106	7740	6484	5909	7514	5923	5910	5889	18386	11150	15560	10148	8061	8181	4941	5263	4658	3070	3526	2914	1371	1235
583.3	26916	30061	11688	11440	11171	13020	10481	11081	7176	8414	6433	6164	4863	3973	2338	3335	2806	21801	13544	11243	9232	11336	6366	9287	6617	8305	6570	7264	6701	7736	5437	6604	6574	5530	6538	18841	9261	14535	9192	7889	6270	5382	5361	5334	3186	3402	3292	1294	1321
585.3	27563	27721	14510	13907	12281	11774	9047	8821	6808	7386	6756	6101	4921	3847	2355	2981	3082	21303	13464	11516	9984	8164	5273	8390	7646	9044	7465	6344	6299	6046	6647	6114	8723	6471	6120	18092	11226	16122	10410	8392	8697	5033	5300	5082	3031	3876	3239	1266	1315
587.3	20698	25611	14224	14169	12704	12434	11205	10342	7265	7262	6536	4852	3848	4016	2465	3184	3331	16347	10597	10895	8808	6504	7297	9670	6587	6374	8432	6328	6367	7123	5430	6470	5879	5766	6919	17733	9867	17028	10371	8513	8553	6321	4958	5603	2921	3398	3090	1348	1389
589.3	22121	30078	15196	12148	12145	14406	9782	10325	6427	6699	6879	4455	5243	4065	2564	2821	4066	22315	14944	10549	7816	6469	5163	9547	5711	8101	8206	6245	7467	7703	5578	7276	8794	5978	6822	18755	9609	15318	9977	8474	8748	5331	5164	5502	3272	3740	3352	1421	1331
591.3	24016	29759	12275	12264	11056	11849	10843	9540	7268	6756	6777	5775	4507	3867	2334	3491	3649	19588	13253	10861	8892	11502	5973	9244	6191	6908	8534	6273	7761	7515	6670	7286	9194	7444	6611	17906	12894	15227	10427	8669	7941	5033	5251	5295	3162	3792	3096	1334	1391
593.3	27476	21345	14081	10300	11318	12477	12212	9151	5480	9077	7491	5630	4425	4083	2411	3110	2899	19890	12728	10871	9597	6802	6336	9820	8709	8908	7663	6071	7338	7702	4767	7317	6173	5666	7127	18150	13209	16804	9794	8217	8637	5655	5333	5831	3311	3187	2993	1355	1358
595.3	29257	31090	12935	12296	10953	12354	14814	10628	7541	7051	7038	6117	5204	4029	2572	3247	3786	22854	10935	12006	10233	8575	7341	9735	7236	8718	6726	6397	7162	7428	6439	7107	8518	5508	5802	17864	12695	16753	10279	8384	8531	4848	5439	6057	3231	3142	3324	1452	1443
597.3	29154	31515	11995	13599	11703	14787	10818	9934	7315	8176	6589	6327	5402	4154	2179	3161	2903	20107	12395	10376	6645	7675	6697	9838	5037	8277	7380	6435	8003	7658	5259	8187	6358	5351	7111	16055	9017	16919	10684	7326	8818	6146	5523	5483	2826	3757	3403	1504	1467
599.3	28213	29903	12651	10400	12418	13456	12496	10564	8068	6244	6819	5605	4453	4189	2455	2923	3477	22382	10827	8884	9517	6882	5972	9842	6770	8086	8521	6296	7022	6899	4301	6333	6870	6005	6267	15402	13100	16586	10535	8715	8691	5202	5247	5736	3448	3744	3065	1426	1491
601.3	27677	29195	14539	13370	12312	11944	11587	9757	7639	7081	7367	6073	5294	4183	2754	3034	3894	16939	10616	9023	8403	8574	5862	9489	6615	8218	8801	6356	6927	7992	3440	6785	6434	6313	6181	18659	12064	14252	10757	8414	8333	5689	5632	5311	3292	3674	3067	1574	1414
603.3	28134	32408	13037	12696	11205	12552	12914	9212	7712	9614	7354	6633	4983	3853	2476	3245	4089	22651	10780	12969	7293	9604	6637	9090	6336	6033	8577	7258	5945	5731	5320	6639	8723	6171	6539	18206	12580	15932	10209	8711	7843	6041	5665	5341	3513	3801	2907	1475	1427
605.3	25368	26285	15146	14334	11035	12734	11592	10250	8176	7209	7154	5902	5585	4250	2946	3025	3116	23982	11148	10714	6564	7605	6162	10297	6396	6402	8583	7003	7183	8033	6221	7771	7143	6660	6222	18876	13684	15693	10973	8638	9021	4872	5615	5999	3066	3283	3259	1493	1445
607.3	24810	31398	14187	11532	12285	16249	12506	9901	7150	6914	7741	4767	4859	4420	2694	3736	3538	20021	13675	9710	7341	7657	4920	10431	7166	6889	7995	6554	6936	6453	5014	6140	6865	5710	5973	18901	13787	15783	10887	8470	8601	5658	5553	5992	3435	2921	3189	1541	1487
609.3	27215	25386	12940	11722	11007	13948	10645	10216	7102	9189	7102	5043	5350	4439	2808	3651	3029	20360	12762	11442	6864	11457	5602	10419	7478	5865	8696	6596	7250	5817	5781	6737	7490	6433	7002	18558	13000	14070	10850	8453	8995	5779	5181	5717	3570	3151	3344	1447	1581
611.3	27442	29267	13405	14188	12474	13032	9607	9815	7846	8741	6827	5571	5098	4423	2719	4093	4336	17169	11521	10168	10788	6584	7065	9930	6654	9079	6058	6368	7249	8236	6175	6596	6793	7113	7185	18852	13782	14915	11096	8757	7824	6511	5095	5486	3561	3990	3159	1577	1576
613.3	29542	29263	12909	11213	12768	14239	11981	12243	5945	8434	7371	7283	5569	4561	2828	4060	3773	22274	14098	12546	7033	6448	4736	10436	6520	8871	8662	6494	7984	5790	6730	5946	6868	6110	5975	18533	13741	15533	10675	9132	9148	6060	5491	4553	3338	3753	3610	1524	1538
615.3	29490	29313	11333	13627	12228	17328	12343	10754	8201	8062	7239	5912	5901	4620	2800	3861	3622	20818	10784	12289	8516	6535	5365	10107	6089	8945	8138	6916	7150	6673	6587	6726	6655	6079	6258	17873	10538	14984	10566	8417	7914	6055	5723	6109	3341	3502	3585	1623	1586
617.3	28744	31045	13691	13489	12378	15244	11805	9736	6589	8701	7844	7231	5054	4495	2502	3590	4356	22193	11699	9845	10719	6822	6649	9375	6302	8361	8370	6970	6298	5255	5746	7322	7072	6010	6803	17964	13470	16501	11262	8106	8741	5460	5649	5343	3510	4013	3412	1615	1580
619.3	20495	29619	12347	15078	12580	16259	11204	11418	8714	7506	7117	7402	6032	4960	3080	3941	3507	23026	12350	9240	8550	8133	7517	9459	7240	5854	8225	7016	7809	7809	4919	6291	8174	6485	6761	18474	13985	16179	10303	8800	8398	5660	5207	6127	3535	3217	3442	1608	1614
621.3	30235	26742	12558	13287	11753	16892	14426	10857	6705	9035	8118	7454	5871	4243	3253	3328	3983	23696	14221	12491	7041	6965	7828	9758	6118	9148	8474	7232	8105	7397	6933	6073	6699	5686	6638	17355	10573	15957	11214	8965	9156	6201	5907	6389	3634	3957	3330	1555	1669
623.3	21218	31691	13278	14429	12583	14182	15359	9823	8253	7541	7935	7419	5719	4709	3186	3919	4093	23378	10919	9323	9100	6986	5072	9571	6270	6497	6483	6759	8225	6551	6119	7211	8816	7213	6883	18395	11404	17829	9712	8801	8736	6608	5749	6152	3608	3691	3300	1739	1640
625.3	30274	31435	16548	13309	14934	15247	10306	10394	8502	9004	8079	5721	5545	5009	3285	3777	3882	21638	10883	10246	8259	8172	5371	10343	6342	6467	8746	7089	8296	8211	5540	6825	8309	6080	6248	19456	13091	14517	10810	9166	8239	5291	5949	5570	2943	3609	3768	1561	1580
627.3	30867	28507	13656	14370	13189	13925	11132	10981	8329	7701	7733	7065	5512	5039	3035	4025	4632	20216	11455	12801	7865	6630	5910	10666	9139	8713	9050	6672	7634	7035	2883	6737	6542	6190	7388	17778	9403	16194	10874	9331	9323	5351	4425	6224	3643	3948	3564	1621	1652
629.3	28791	23947	13277	15155	12882	14285	14882	13662	7977	7976	8128	7634	6220	4972	3159	4093	4632	22328	13453	12233	9346	8685	5643	10645	7056	7711	8545	6446	8390	7786	6666	7722	6932	6205	7331	15205	13460	16650	11233	8998	9383	5681	5762	6329	3533	3760	3493	1754	1683
631.3	30055	29641	11792	12560	11821	12596	11683	11034	8040	6973	7653	6961	5473	4714	3472	3970	3517	21379	14001	13382	9523	6508	8247	10548	7370	9419	8241	7091	6393	8320	5295	7265	7287	7375	7111	19030	14098	14242	11646	8230	8837	6153	6262	6306	3492	3563	3877	1651	1650
633.3	27690	31679	14140	14276	14175	15221	11880	10239	8320	8922	7700	6897	5589	5021	3047	4688	3428	17792	13792	10317	7172	7490	6445	10674	6555	8905	7777	7432	7705	7004	6651	6417	9201	6172	6654	19635	14275	15760	11849	9206	8951	5559	5891	6689	3729	3561	3755	1681	1656
635.3	29821	28973	13857	11054	11922	15324	13551	10716	8298	9593	7702	7541	5125	4858	3467	4010	3513	21082	11624	12033	8517	8989	6143	9858	5986	6727	8735	7112	8228	8651	7129	6308	6288	7026	6664	19081	14328	13979	11376	9383	9389	5310	5970	5959	3701	3966	3937	1784	1719
637.3	27935	31173	11846	15084	12504	16801	12824	12901	7697	7383	7671	7665	6242	4605	3177	3718	3680	22540	11414	12789	10563	11965	5053	9874	6534	6947	9211	6734	8371	7995	7141	7705	7043	5596	6380	18806	12538	16968	11414	9392	8831	6681	6093	6249	3816	4147	3786	1713	1656
639.3	31869	29456	14772	13201	14201	15861	10666	10588	8845	7334	7391	6175	5848	5009	3417	4255	3558	22170	12040	13284	8900	8161	6674	10577	6736	6834	8649	7109	8382	6132	5960	6477	8774	6292	6857	18988	11304	14556	11666	7593	9433	5792	5846	6531	3517	3583	3689	1752	1814
641.3	30568	29885	15831	15108	14192	17107	13902	12324	8103	8129	8195	7981	6182	5485	3364	3892	4701	24307	14066	11978	8555	8866	5461	10371	7930	7853	7650	7417	8310	8724	5759	6539	6577	7441	7474	20324	12795	17393	11796	8731	7132	6611	6065	6034	3448	4367	3453	1662	1717
643.3	26357	32020	16267	14868	12832	17480	12734	13603	6981	8317	8578	8276	6143	5007	3513	4003	4167	21489	14075	11923	7458	10969	5251	10644	6532	9194	7727	7380	6887	6838	7416	8372	6630	6526	6961	17296	13528	16207	11863	8075	8837	6314	5995	5847	3762	3906	3525	1779	1746
645.3	29284	28795	13005	13052	12937	14700	12900	10528	8429	7779	7848	6260	5912	5291	2987	4180	4755	21492	13083	9786	8373	7636	7685	8551	6416	8745	8582	7106	7876	7810	7589	7223	7905	6379	6764	19504	11987	16246	12093	9596	8856	6141	6089	6580	3737	4035	3423	1742	1675
647.3	28941	32639	13131	14766	14312	13874	10760	10783	8285	9082	8449	6368	6461	5561	3421	4930	5008	24648	11347	11544	6729	8096	6629	10360	6412	7682	7091	6704	7373	6786	6620	7587	7222	6879	6360	16575	11795	15265	10806	9331	9316	6548	6330	6204	3630	3678	3940	1845	1780
649.3	20333	30288	15812	15368	12246	16217	13050	12500	9010	7186	8900	8716	7180	5553	3543	4325	4092	24770	14137	12369	7375	10999	6281	10771	7327	6973	8199	6580	8363	6844	5459	6533	9370	6979	7073	20121	14092	17106	11841	9789	9118	6856	6336	6655	4021	3690	3984	1642	1834
651.3	27896	28812	12496	14904	13039	13666	12093	10827	8410	10358	8700	8503	6422	5159	3664	4244	4183	19661	14003	8985	8934	8261	6201	8395	6370	9224	7636	7421	6625	7914	4830	8592	9336	6276	6817	16506	10994	17592	12270	9575	9234	6795	6198	6555	3518	3620	3806	1816	1771
653.3	29125	30997	15399	13847	12207	13253	11329	11604	8868	8922	8284	7804	6005	5725	3813	3653	4609	24742	11629	13550	9150	9505	7988	10453	6557	6960	9083	7260	7560	6962	3584	8109	8419	5693	6472	14608	11224	15459	12104	9856	7065	5877	6363	5833	3913	4438	3527	1932	1783
655.3	30853	30360	14243	15343	12861	16252	12813	10871	9565	10370	8421	6041	6944	5684	3617	4813	4696	23072	12091	11761	8966	10740	6567	10985	6964	9139	9157	6674	7420	7059	5268	7248	9671	6780	6666	20611	13955	17533	12267	9702	8573	6748	6207	6548	4060	4480	4025	1834	2037
657.3	30359	32263	16794	13636	12548	16197	15041	10127	8153	7935	8519	6756	5840	5852	3636	4430	3749	22153	13253	9436	7979	9009	5513	10080	7508	9054	7330	6536	7006	8079	7927	7094	6962	6467	7672	18419	13404	17321	11121	9533	8549	6355	5661	6884	4102	4093	3493	1987	1925
659.3	26457	29719	16893	15781	12624	14535	11363	10727	8918	8242	8681	9194	7118	5775	3834	3639	4176	17217	14143	10632	10995	8340	6447	10774	9416	9402	8705	6887	8643	6270	7656	7145	8041	7716	7139	19554	10367	16585	12062	9516	8899	6827	6088	6109	3980	3832	3991	2010	1964
661.3	27108	28619	14340	15473	14904	15412	10772	10450	9089	8063	9105	9312	5979	5529	3953	4337	5042	24377	12266	13566	9346	7567	7201	9653	8596	9884	7989	7511	7543	8571	6034	7158	9162	6514	6661	19835	11019	14311	12233	9665	8985	7136	6192	6266	3772	3630	3568	1750	1922
663.3	32070	31406	16299	14753	13879	14577	14860	12846	7884	8385	8327	8625	7064	5681	3878	4919	4888	24059	11904	12523	11384	8694	6428	11225	8561	7321	6467	7995	8229	8312	6532	6549	9278	6431	6430	20376	14656	18519	12358	9887	9091	7098	6329	5401	4046	4005	3840	1874	1979
665.3	20670	30444	13762	11762	12709	15546	15505	12164	9420	10679	9672	9563	7875	5222	3320	4362	4074	22506	12478	13804	8215	8096	5538	10914	5919	9337	7336	7584	6954	7640	6535	7377	8598	6238	6143	19894	13649	15507	12566	9812	8523	6317	6661	6676	3708	4397	3882	1975	1920
667.3	30664	25411	15782	15999	12316	18107	10897	11281	9702	8642	8661	6603	6355	6144	3980	5020	4127	24265	11010	12836	7549	12149	7427	10609	10057	7583	9222	7866	7714	8915	5704	7593	10173	6275	7179	19771	10308	16776	11692	9268	9664	6224	6356	6669	4038	4488	3566	1924	1883
669.3	30339	23151	12835	15611	12740	16779	10876	10586	9406	8770	9377	8539	7453	5732	4077	4741	4130	24223	12944	12853	9772	6548	7049	10760	7506	9207	8541	8012	6681	8645	6856	6922	6403	7419	6810	20242	14798	14986	11780	10003	9520	6817	4747	6593	4116	4006	3803	2021	1940
671.3	32927	32151	12648	16168	11764	16551	15170	13661	7831	8117	9132	8131	7059	6266	3090	4721	4855	25614	13892	12440	8466	9736	5875	10755	6412	9117	8874	8004	8480	8765	7071	6728	6628	6686	7404	19748	14205	17356	12628	8964	7550	5441	6538	6879	3831	4315	4228	2053	1943
673.3	32092	26520	14787	13892	12722	15657	15946	15318	8866	8783	8295	9511	6700	5700	3160	4913	5197	20103	14621	13053	8635	8423	5781	9454	8193	7459	8959	7225	8459	7276	5936	6833	9791	6448	7470	15147	14667	17408	11001	9239	9849	5843	6449	6848	4036	4457	4342	2004	1916
675.3	30841	30916	16768	13367	14598	15773	13383	10849	8550	8544	9364	6779	6814	5710	4137	5014	5351	23323	14513	9675	8539	10759	8840	10713	8100	9260	9360	7507	6576	8281	6965	6948	9019	6880	7210	20296	11835	16133	12244	8926	9717	6307	6318	6200	4274	4322	3983	1927	2122
677.3	26117	29824	16059	13342	12625	15682	13900	13604	8918	7673	9335	9528	6873	6252	3807	4492	4013	22102	12086	12768	9007	7220	6061	9369	7670	7028	8824	7003	7104	8086	5580	8242	9551	7809	6913	19721	12943	14844	12007	8628	9114	7194	6793	6504	4085	4291	4204	1818	2061
679.3	27014	24564	14758	13779	14798	16117	11230	12963	7769	9533	8772	9152	6544	6268	4072	4679	5619	20282	10598	13589	10864	11529	7430	10889	6318	9944	8874	7195	7301	8420	6807	7224	8725	6301	6909	18683	14527	17192	12739	10015	9600	6952	6644	4427	4251	3911	4270	2043	2087
681.3	23938	31597	14793	10262	13317	15441	12795	11675	8787	8372	8875	8576	8408	5349	3774	5384	4999	24885	13078	13870	11037	7186	8189	10871	6650	9780	9441	7594	6461	8101	6416	7854	10485	8294	7207	20701	15070	17245	12020	10225	9224	7057	6483	6894	3988	4611	3899	2108	2039
683.3	31184	30579	12937	16012	13978	15282	15438	14049	9426	10773	9138	9188	7741	6209	3199	4621	4278	24130	11792	10027	8274	7311	5192	10666	7466	7588	8766	7888	8812	7695	7148	8617	7324	6301	7689	20544	12418	16168	12354	9767	9484	6651	6496	6338	4151	3807	4083	2113	2018
685.3	31702	30101	13647	14718	12239	15702	12502	11623	9971	10111	9328	8848	6428	6449	3804	4425	5583	25022	13729	13878	10628	10204	5559	10961	8671	7695	9278	7188	8712	7886	6023	7033	9391	7086	7126	20729	11268	18313	12292	10406	9988	6651	6562	6912	4264	4566	3518	2055	2031
687.3	31745	30601	16294	16447	12582	14007	14999	10580	9937	8854	9087	7702	7469	6109	3989	5711	5324	24770	14770	9745	9100	8881	7803	10503	5708	9846	8971	7189	6491	6595	5690	7198	7467	8210	7446	20074	15201	16410	12728	8913	8323	6387	6766	7466	4082	4154	4109	2126	1826
689.3	31342	26935	14529	16039	12241	17273	15036	11861	9261	10638	9476	8921	7230	6559	4355	4343	5324	24184	11437	13027	11573	11214	6465	11318	8285	10153	6262	7507	8656	7762	6329	8326	10132	7974	7998	19975	13081	18200	12094	10039	9486	7494	6615	7027	4495	4093	4153	2087	1933
691.3	23835	33278	13067	11852	14750	18617	16123	11278	8402	11539	9743	9933	6645	6079	4368	5442	5648	24739	13274	13359	7167	10088	4783	10783	7466	8879	9247	7151	6240	5759	6598	7160	8082	7146	7789	21209	14565	16955	13027	9930	9846	6956	6666	5413	4569	4484	4248	2228	2143
693.3	25384	29316	12432	16246	14480	14621	12651	13663	9815	8484	10341	8227	8385	6147	4280	4959	5919	24237	11808	12447	9458	7361	8027	11744	6656	10202	8465	7606	8780	7012	5851	6864	8239	6501	7006	20298	14881	19335	12875	10148	9753	7728	7011	6948	3657	4496	4334	1975	2044
695.3	32074	30010	16067	12610	15764	17198	16235	14829	9766	10570	9081	7872	7370	5869	4349	4850	5761	24783	11479	11307	8557	7200	6414	11009	6943	9481	8960	7267	8171	7722	5737	7071	7483	7977	8093	20851	13727	17260	13022	10176	9756	5912	6510	6940	4546	4506	4316	1994	2093
697.3	32251	34710	14791	13804	13340	18381	16059	14763	8787	10196	9242	9303	7427	6207	4692	4654	4739	25213	12983	13283	9401	10945	5820	9975	7023	7725	9052	7361	8954	8446	7445	6316	9342	7045	7725	20322	11240	16685	11238	10032	10020	6126	6971	7255	4264	4617	4206	2151	2363
699.3	32645	30814	13013	16406	13137	17435	13019	13992	8412	8163	9946	9126	8679	6392	4224	5015	5649	24045	12801	12164	9401	12062	6509	9691	6428	9511	8300	6980	6548	6698	7160	6401	10179	7083	7401	15902	13673	17993	13244	10076	10219	7842	6772	6840	4381	3413	4443	2150	2173
701.3	33211	31377	13576	11919	14080	14713	17507	11711	9953	11081	9572	9429	7477	6763	4209	4754	5830	25295	12036	12868	8155	12072	6812	9991	7031	9703	7552	7750	8776	7657	7141	7224	8222	7853	7633	20913	10431	14348	12793	9656	10067	7140	6731	6254	4392	4116	3762	2218	2308
703.3	30405	31229	16486	16502	14151	17239	15360	12176	9185	9312	8828	10889	7363	5775	4614	4699	6084	25161	12542	10694	11628	9754	6192	11118	6481	9913	8882	7181	8730	8993	8182	6889	10540	7072	7685	20657	13034	19034	12617	9626	10003	6376	6847	7273	4352	4318	4271	2257	2213
705.3	30751	27149	16665	16191	13735	15941	15833	11450	8344	8884	10084	9752	7645	7052	4633	5572	4993	25993	13564	11244	8143	11226	6775	11304	6887	9512	9555	7056	6733	7525	6705	6225	9859	5896	8128	17924	14077	18463	12788	10167	9228	7158	6567	5704	3970	4411	4130	2213	2330
707.3	31899	32566	15348	15347	14959	19102	15383	11979	9439	10435	9863	11008	7880	6959	3723	5719	6149	25673	13059	11222	8116	8921	5317	9883	11154	7213	9697	7289	9141	8351	4747	7595	7342	7725	7914	20407	15549	16957	13360	9981	10092	5980	6639	7248	4590	4647	3631	2354	2257
709.3	33081	33025	11890	16759	13488	20269	12605	11039	8940	11777	10198	9098	8669	6796	4519	5377	4693	25124	11978	10534	11824	10612	6086	10744	8240	9668	8169	7945	7471	6717	7035	6937	7554	7244	7198	21197	13281	17628	13418	9826	10041	7317	5146	6724	4583	4105	3709	2360	2177
711.3	32371	33245	17616	15194	13677	17354	15796	14880	8804	8300	9587	7814	7894	7068	4611	5912	4671	23972	13545	12382	9268	7261	6900	10026	6898	10444	8748	7511	7942	9208	4090	7286	10680	7499	6816	21336	15527	15616	13308	10248	9865	7142	6921	6991	3855	4484	4503	2331	2014
713.3	32062	27902	12072	16260	15626	16947	14054	15121	10653	10492	9883	7805	8839	6645	4740	6143	5190	25274	12288	10384	8508	9000	6149	11182	8342	10183	7457	7130	9094	7857	7576	7511	10241	8050	7529	21452	12082	17239	13203	10352	8894	5848	7155	6594	4740	4758	3768	2330	2307
715.3	31971	29844	15358	16963	12750	18325	16025	11120	8328	8783	9713	11574	8173	7327	5022	5687	6236	26027	12734	11346	11882	11379	6870	11393	7893	9254	9121	6987	6837	8683	4522	7597	7836	6701	7522	19413	12618	17423	12911	10209	9974	7001	6836	7244	4537	4159	3837	2280	2179
717.3	33629	33175	13933	15371	13582	15218	15397	12198	11458	8935	9673	10151	8245	6720	5214	5885	4414	24103	14654	13994	11902	7484	5320	10989	7578	8225	8808	7235	8841	7966	5636	9218	8672	6376	8215	19568	14940	19023	12540	10162	9831	6474	6967	6161	4047	5075	4359	2400	2362
719.3	32444	26692	15034	14220	14856	19562	17814	12137	9931	8460	9886	8888	9430	7272	4665	5768	5017	23582	16562	10720	8443	8567	8363	9927	8666	7947	6127	7187	8928	8823	6829	7213	8069	6785	7794	20976	14759	17554	13593	10062	10309	7050	7060	7558	4427	3616	4488	2125	2201
721.3	32337	26814	14511	15608	15079	18058	13259	11850	11321	9787	9536	7944	9771	6726	4129	5992	4328	24501	14892	12803	9744	10365	7052	11331	8132	7446	9066	7796	6704	6989	6737	7738	9743	7670	7395	21490	15382	18091	13424	10504	10043	7728	7062	7751	4489	4905	4155	2262	2327
723.3	32623	35138	12840	16940	13014	16338	16042	13864	11265	8905	9893	8418	8546	7483	4649	5514	6189	26055	11064	12687	11538	9328	5760	10157	7227	10184	9774	7390	8784	7786	7356	9198	9994	8543	6736	20177	14385	19356	13507	9896	9831	5432	5018	7291	4588	4738	4139	2020	2306
725.3	33360	30190	17380	12735	13527	18916	16054	13278	11224	8334	9476	9874	8352	7134	5269	5135	4763	25078	13375	12311	10567	10755	7487	11639	10388	8285	8971	6967	7007	8288	6621	7350	9851	7197	7683	18955	14790	18704	12814	9854	9121	6967	7050	5352	3749	5016	4125	2427	1753
727.3	33170	34959	14901	16749	13049	18230	16581	11244	11597	9806	10387	9184	9605	6404	4943	5850	5130	26127	13947	11420	8743	7240	6915	11620	7430	10075	9517	7154	8408	7360	7289	7421	8620	8370	7185	18201	13910	17226	13540	9575	9985	6329	7075	7620	4291	4694	3534	2374	2361
729.3	29631	35102	14724	16788	13767	13974	13025	11766	10043	9065	10245	11283	9148	7454	4889	6084	4389	25585	14418	12012	10362	7250	6097	11608	8192	8951	7698	7302	9204	9101	6779	9302	8779	7697	7362	20854	14806	17668	13352	9560	10125	7087	7339	5681	4866	4589	4594	2554	2394
731.3	32545	30642	17564	16237	15512	18511	16041	11243	10911	11881	9979	8452	8725	7656	4050	5190	6766	24183	12871	14024	8826	8632	7780	11431	8594	7669	9880	7219	9108	7822	6615	9411	7651	6064	7524	21541	14948	18427	13211	10272	9807	6547	6959	6822	4688	4346	4623	2380	2505
733.3	30166	33675	15594	13731	14405	16121	12755	13492	11422	12450	9487	10931	7958	6354	4917	6525	5973	20826	12002	10725	7755	9911	7394	11133	8407	10760	7160	7819	8764	9243	6709	9362	10096	7133	7091	17767	12326	17703	12817	10409	10339	6754	6296	7592	4079	4136	4579	2268	2488
735.3	33102	34522	14730	14470	14448	19313	13713	11781	10248	10354	9890	10857	8541	7724	3800	6395	4544	25761	13961	12890	7847	9212	7079	11330	6486	7335	9690	7230	6749	8504	4778	7325	8550	6968	7980	21777	15161	19097	13252	10179	9641	5993	6067	7447	4839	4234	4511	2532	2668
737.3	33366	33240	16141	14777	13215	15355	15911	13951	11359	9471	10100	8923	9873	7606	5576	6251	4698	24939	16218	12301	9060	8333	8440	11691	6813	8919	9535	7116	9179	8069	7619	6930	7942	8167	7061	21989	12762	17890	13798	10454	10561	6559	7105	7572	4381	5147	4273	2630	2387
739.3	32492	30037	14710	15594	12833	14934	14629	11878	11495	8729	10180	7456	8048	7784	4953	6178	4816	25924	14459	13702	9442	9902	6322	11350	7036	7487	9546	7246	7364	7986	6506	6879	7827	8517	7666	20625	14410	17542	13646	10671	10026	7873	7047	7026	4049	4652	4028	2502	2565
741.3	34908	31421	15284	16072	15351	16477	15562	11676	11250	9572	10518	9344	8478	8011	5362	6199	4658	25479	13906	12212	7936	10605	5224	10350	8067	9952	9528	8297	7288	8911	6516	7372	8461	6949	6820	20927	15348	17151	13562	10876	10110	7360	7171	7568	4167	4495	4835	2621	2447
743.3	34434	34642	16496	16327	15046	17881	17142	16399	10455	9677	10942	12426	7999	8057	4350	6440	5931	25653	13786	10546	8910	11911	6027	11747	7537	10078	9872	7651	7812	7916	7586	7826	8328	7505	7175	21933	13658	17926	14081	10713	10583	5919	6601	7517	4784	4249	4437	2625	2540
745.3	33316	31671	16046	16854	12964	19496	15221	10835	10737	11560	10127	11787	7890	7315	5597	5683	5419	25345	13409	12143	10096	8470	7057	12131	9983	9142	9815	7953	8273	9149	6630	9120	10718	8021	7639	20145	14994	16673	13599	9329	10204	7912	7195	7673	4993	4782	4547	2711	2490
747.3	32131	34748	18125	17109	13236	20080	16278	15598	11798	12124	11994	10734	10146	8200	4596	6122	4713	25293	12857	9037	10267	7352	8625	11814	7012	10478	9776	7972	9132	8002	4742	7918	8635	8211	8020	20197	12371	17683	13656	9413	10316	6504	7241	7223	4848	4866	4521	2513	2492
749.3	30020	32913	15017	16508	13453	20453	18094	12341	10865	10849	10241	12463	10438	8071	5293	5165	4666	21784	13277	14563	8649	12382	7033	11727	7609	9139	8950	7865	8201	6534	5680	8840	10557	7424	7447	20066	14670	15353	13466	10184	10212	7684	7381	7190	4750	5050	3863	2564	2566
751.3	33126	28969	16910	15508	14359	20359	15281	12462	11098	10531	10185	10109	8056	8095	5630	6045	5022	25310	12837	12458	10473	8846	6690	11142	8577	10215	9724	7321	7678	9470	5568	8178	10153	9183	8275	22027	15327	16022	13311	10603	10569	7444	6465	6961	4994	5333	3971	2346	2442
753.3	33508	35808	17415	17041	13458	19113	14664	13140	11568	9053	9815	12180	10518	7891	5920	6497	6188	23434	14071	12539	9192	7174	7568	11492	7413	10021	9939	8060	8712	9190	7453	6756	10729	7142	7947	19425	14016	16812	14260	10529	9344	6388	7263	7951	4307	4574	4043	2502	2681
755.3	33297	34367	18020	14272	13650	17682	16756	14878	11235	10863	10580	12553	10684	8144	5723	5481	4556	24952	15721	13388	11060	9782	8484	11393	8268	7646	9906	7508	9054	7443	4647	7173	10910	6725	7168	21677	16283	19673	15013	10237	9757	6810	7473	7813	4920	4602	4634	2736	2708
757.3	27428	25090	13790	14072	14803	19152	17296	11603	11920	9278	10185	8791	10566	8317	5069	6053	5923	25855	13920	11907	7616	9631	5707	9973	7888	10253	8725	7957	9118	8607	8051	7691	10663	8428	7148	21351	16057	17795	13091	9579	9344	7160	7399	7484	5142	4579	4860	2707	2725
759.3	34916	32859	14795	17074	12978	18975	12705	10647	12058	9647	10710	12350	10318	7485	5771	6502	5571	25503	14279	12413	11817	7554	7669	11413	7537	9751	9410	7184	8096	8553	5699	8152	8394	7331	7754	19746	11910	19012	13955	11078	10067	6524	7250	8028	4748	4438	3990	2758	2718
761.3	33751	33538	15042	15907	15289	17340	14203	14957	11968	11343	10926	10653	9794	8033	5111	6131	6667	25774	14948	12516	9197	9685	5240	11342	8445	8382	9707	7583	8516	7325	8028	7498	11001	9067	7828	21480	14190	19130	13796	10626	10562	7701	7355	8052	3822	3915	4650	2755	2781
763.3	21776	35947	13849	12169	15686	19426	15693	13024	9880	10439	10171	8975	10657	8257	5308	6268	6477	25821	14891	12557	7731	10572	7300	11752	8177	9932	9548	8557	8950	9816	6186	7486	9244	6913	7060	21911	12722	19127	14063	10673	10511	8020	6782	7766	4139	4783	4580	2300	2621
765.3	28263	30340	14611	17251	13477	16314	17114	12165	12381	10844	10572	12585	8443	8439	5605	5637	5087	25885	15660	12988	9862	7401	5908	11892	8536	10609	9456	8137	9618	9235	7108	9250	10478	8008	7976	21872	12942	19419	13454	10156	10610	6651	7073	7621	4317	4904	4884	2669	2740
767.3	27640	33500	17846	15680	15943	18072	12499	12010	10252	13260	10745	9338	11162	8295	5433	5774	5567	26997	14488	11128	9124	12167	7232	11703	8893	9033	9153	7153	9285	9549	6675	8830	10273	7405	8195	19033	16642	19422	12284	10975	10107	6938	6783	7696	5027	3926	4402	2478	2961
769.3	28112	32101	14566	17401	15348	16422	17210	11591	10612	9208	11812	13164	9631	8317	6065	7166	5022	23628	12526	13069	8801	8388	7409	11472	10980	8433	8092	7454	9081	9649	6995	7983	10049	7020	7044	21438	11740	19164	13473	10754	10341	7366	7472	7233	4506	4890	4668	2822	2400
771.3	33570	30819	15680	16524	13563	16617	13708	11731	10260	10712	11445	12205	8439	7517	5554	5883	5472	26964	14230	13459	9326	7493	8689	10200	8223	8028	8536	7780	7237	9909	5776	9139	10887	6795	7146	20137	15455	17984	14081	10648	10780	7971	6449	7614	5297	4813	4162	2626	2806
773.3	33325	35369	15239	14233	13483	20015	13662	15115	10377	10282	9862	13233	9530	8441	5874	6976	5101	27174	14966	14205	7789	7583	6320	11506	7146	10380	8432	8206	7182	7755	8609	7160	11121	7876	8115	21518	10848	17697	14745	10148	9623	6940	7483	5326	4933	5453	4403	2837	2888
775.3	33620	30809	13993	17466	13390	17488	15989	15408	12880	12208	11243	13580	11112	8649	6365	5686	7433	20932	14598	12245	9555	12169	7927	11257	9253	9518	8536	7266	8166	9599	6843	9098	10284	7330	6858	22529	12184	19136	14509	10563	10217	7382	7451	7511	5234	4912	4342	2770	2861
777.3	35404	29751	16450	16045	15299	21477	17283	14816	12071	10397	10258	13211	11178	8939	6169	5988	6652	25391	12612	12887	10668	11342	7234	10849	9133	9598	10346	7801	9529	8152	8532	7359	8263	8937	6915	19506	15728	17760	13997	9782	10861	7647	7661	6822	5339	4637	4402	2887	2858
779.3	30940	24775	16446	17844	14767	17506	12441	12323	10769	10747	11027	12052	9435	8921	6115	6980	5179	19757	14067	13403	9476	9133	6454	12034	7621	9008	9610	7480	5884	7441	5684	7913	10178	7615	7333	21628	13891	18588	14473	10696	10025	6520	7591	8169	4601	4997	4522	3021	2880
781.3	34509	29500	14089	17539	13696	17249	17196	12039	10085	10369	10341	11222	11421	8322	4423	6747	6636	23954	14112	13017	11436	7522	7250	10977	7343	7944	9573	8107	7993	9173	6470	8327	8693	7057	7733	20934	13173	16596	14459	11025	10566	6503	7551	5494	5085	4355	4702	2492	2495
783.3	35247	30728	15796	14133	15331	18527	17152	15771	11516	10084	11137	12833	10893	8927	5303	6036	6654	17990	12533	11262	10066	6721	7919	11781	7238	8637	9018	8133	7979	7879	7271	7429	8098	7013	8497	21602	13560	18537	13610	10020	9651	7750	7385	8241	5196	5089	4792	2989	2268
785.3	35088	32397	17991	17058	16443	22324	12960	13866	10042	11855	10761	13187	11597	8047	5194	6799	6169	26024	13620	13129	9074	9777	7162	11487	7433	10669	7934	8360	8402	9119	5320	10217	8711	7915	8193	21279	11558	17614	14978	10577	10372	6609	7164	6889	5100	4960	4943	2952	2894
787.3	34392	33681	15297	18008	14725	19220	14473	17115	11845	10194	10469	11729	11639	8339	6417	6386	7256	25856	12881	11747	11642	9745	7283	11565	7151	7365	7736	7656	8484	8018	3878	8617	8357	8739	8289	20396	15043	17684	12541	10424	10726	6647	6997	8253	5165	4614	4847	2817	2773
789.3	22496	31113	15825	17546	13072	16954	14301	13542	12284	12782	11340	14631	11400	8570	6011	5818	5186	23109	14834	11264	9006	9867	7185	12089	8020	10493	9563	7958	8640	8192	8277	8953	8103	7255	7206	22155	16962	18036	14354	10929	10325	6763	6874	8263	5057	4618	5154	3060	2990
791.3	34411	33444	15159	14884	15260	17766	17351	16105	10018	11257	13641	10827	11296	8606	5475	6294	7338	26526	14252	12648	9747	13108	6362	11572	7001	9338	9504	7591	9246	7254	7712	9516	8818	7493	7651	21406	15364	17968	14439	10893	10220	6366	6822	7658	5049	4375	5051	2824	2934
793.3	33781	32477	14037	16028	16091	18029	12957	11954	9512	9655	12288	13301	11779	9036	5634	6565	6772	26659	12999	12469	9813	11159	6491	10776	6926	10329	8774	7653	7353	6774	4428	9163	8312	7145	7823	21915	15814	18877	14911	10916	10676	8113	7745	8040	4566	5086	4179	2846	2695
795.3	34858	35089	16909	14430	15895	19796	17770	15598	12145	9539	11126	11980	11780	8523	6276	6728	6828	22695	13475	13970	9805	9505	7819	10719	10930	10144	8317	7791	8261	8631	7556	7901	7625	9200	7602	18855	14880	17233	14257	10685	9664	7583	7043	7854	4392	5093	4772	3082	2867
797.3	31977	35346	16826	15959	14232	17916	17121	12244	12506	10379	10482	13582	11022	8640	5106	6991	6589	25926	13660	14903	11227	12952	8563	12178	8057	8821	10273	7764	8159	8872	6473	7335	8885	8186	8435	21307	14660	19346	14986	10923	10916	6827	7896	7499	4727	5062	4264	3142	2942
799.3	33553	32622	17866	17680	12446	18921	14147	11652	12415	9932	10638	13914	11040	8281	5010	7394	7145	26529	12071	11604	8502	8777	9573	12003	7840	10801	7347	7390	9362	9667	4606	9045	9692	7246	7761	21114	11328	19635	14493	10646	10396	6971	7483	8352	4794	4761	4406	3000	2765
801.3	27947	32072	13551	16557	13965	23286	12332	14472	11239	11457	11040	13947	10585	9304	6701	7626	6270	22859	12900	11862	8928	11138	7126	12242	8583	9054	10290	8045	7732	8821	5291	7981	10036	7676	8317	21783	11421	18534	14830	9257	10769	7281	7799	6678	4977	5576	4986	3136	3055
803.3	25965	32973	15636	16936	14331	22685	14349	12460	12432	12738	11163	13133	9474	8583	6571	6059	6862	24389	14966	12913	11106	11922	7708	12030	7716	7990	9836	8011	9330	8241	6597	7741	9639	7812	8011	22397	14912	18848	14513	11234	11011	8163	7712	5387	4662	4641	4318	3032	3109
805.3	34800	34931	13377	14918	15156	20338	14571	15144	11022	10528	11645	9763	10735	9257	5151	5897	6273	24511	14756	13470	11086	11595	7611	11406	7626	9573	10021	8334	8052	9625	4408	9394	9122	8652	7731	22468	15022	18775	14372	10953	10573	6213	7211	8053	5241	4899	4993	2909	3123
807.3	35077	33946	17833	15731	14967	16520	14636	12375	11942	10393	11259	13988	10364	8610	6115	6680	6881	25889	13915	11882	8452	9099	8552	11311	9088	7212	9460	8446	8845	7838	7888	7264	10156	7324	7531	19141	16602	18588	13521	11157	11056	7916	7285	8073	5336	5223	5225	3083	3073
809.3	32884	30318	14543	18084	16341	17656	17387	16240	13183	9995	11502	13977	11963	9111	5901	6375	5688	24405	14064	10561	10167	11117	7308	11007	8157	10214	9907	7817	9608	6139	6821	9148	8495	8125	7935	21209	16411	18645	13824	11138	10878	8063	7742	8065	5510	4929	4952	3172	3166
811.3	35987	34707	15749	15822	17510	17347	17024	12974	11116	12385	11179	14505	12322	8947	5907	7689	7533	26818	15415	13453	9056	8823	8880	11420	7527	7417	9441	7749	7406	9880	7026	7167	10942	7865	8554	21698	13127	19430	14995	10759	10894	6910	7873	7912	5282	5269	5131	2979	3125
813.3	34275	31657	14204	17809	14765	22925	17499	13584	12782	10834	11454	13504	12219	9430	6391	7110	5531	25499	14079	14833	12232	9366	7338	11548	7292	8101	9590	8531	7728	9636	8095	7831	8637	8860	8125	22325	17053	20683	14331	11159	10729	6497	7692	5854	5387	4892	4316	2893	2985
815.3	34834	31312	17447	16068	15262	20773	16864	11711	11911	9384	11096	13193	12485	9366	4623	5166	6957	24849	14809	14121	9868	10101	5703	11596	9644	10987	9030	8392	7410	9317	6553	8369	11172	7937	7435	20746	15646	18571	14708	10696	10996	8331	7435	8083	5409	5625	4668	2878	3024
817.3	32941	29815	13485	12918	15512	18315	13528	16121	9824	9369	10719	12719	12359	9357	6323	6915	7411	25035	14277	11143	10007	7583	8063	11445	8916	11199	9700	7876	8385	10007	7427	8393	10382	6966	8109	20857	13717	19487	14930	10833	10441	6475	7578	7795	5352	4212	4542	3179	3213
819.3	35476	31479	14616	16472	14975	19549	13584	17367	12182	11878	11740	14375	12297	9376	6912	6429	6912	26103	12946	11341	9691	9594	5437	12530	8413	11211	9287	8956	7273	9748	6038	8292	9342	8513	8281	19049	15996	20758	14711	9729	11272	7514	6541	7994	5384	4871	5097	3267	3222
821.3	33173	27760	16136	15381	16529	19296	16962	12414	12175	9535	11897	15298	11525	9358	6109	6555	7604	27060	13672	13351	10466	9817	6910	11909	7437	10131	7084	8345	9732	9846	6173	9124	9301	9426	8076	21860	17588	19013	14993	11059	11029	8154	7734	8259	5602	4939	5112	2815	3162
823.3	35706	32692	13872	17401	15274	16597	13812	16559	10667	10464	11884	13243	12066	9503	5703	6837	7903	25451	13241	14884	10043	7552	6275	11938	7611	10641	9010	7526	9567	9513	7971	8645	9649	8773	8468	22127	16544	16767	14424	10836	10983	7409	8018	6300	5345	4612	5284	3359	2682
825.3	30173	35817	17303	14905	13504	18071	17846	12890	12941	10827	11726	13989	12796	9605	6919	7458	5499	26516	13019	12999	12142	9999	7605	12360	8762	7928	9759	8382	7642	8881	6145	8789	10984	9269	7867	20303	16572	17438	14869	10978	11107	6541	8218	8424	4833	5700	5105	3243	3163
827.3	36013	33758	16671	13632	14591	19413	15940	11986	13452	12756	11632	14730	11523	9524	5924	8204	5851	26998	12717	13515	11250	11221	7583	12282	8723	10230	10011	8074	10000	9272	6359	7717	11467	8753	8610	22479	11668	18577	14153	11535	11082	6946	7729	7755	5367	4554	4637	3407	3168
829.3	30529	31257	17329	18336	15640	15983	17455	13797	13063	10444	11060	14932	10922	9247	7311	7237	6318	22898	15441	13191	11612	7911	5344	12475	8782	9592	9440	8016	8025	8048	5927	9755	9236	8926	8599	21302	16878	19190	14556	10853	10992	6772	6765	8319	5004	5436	4801	3228	3168
831.3	26233	33172	17973	17122	13464	20768	12371	12118	12160	11804	12271	12363	12920	9604	7360	7500	6577	24203	13783	12704	10497	7909	9031	10313	9400	10879	9353	7715	6721	9724	6258	8158	11027	7505	8163	22041	16678	20991	14118	11066	10946	7946	7726	7792	5570	5408	4782	3299	3377
833.3	34439	37197	14487	18360	16088	16538	17693	12831	10146	10176	11722	14732	12641	8636	6736	6407	5706	26409	14477	13509	8016	12120	7473	11330	7749	8442	9799	8670	9598	8234	6567	7994	10119	8473	8704	21275	17394	19513	15218	11540	10203	7707	7814	7828	5030	4454	4605	2885	3362
835.3	32776	31265	14475	14748	16858	24080	12695	12875	11736	11350	11973	15310	12821	8892	7126	7019	7625	24974	15287	11656	10009	9732	7778	12416	7151	10192	9365	8211	8151	9559	6062	8176	9142	7922	7748	22405	15387	18489	15111	10445	10754	6925	7831	7142	5313	5604	4894	3224	3353
837.3	33965	34048	16545	17047	13387	21232	13307	15876	13808	13828	12121	13405	9561	9487	6729	8084	6180	22489	13034	14422	11189	8474	6855	12323	9729	10683	10285	8016	9662	8661	7171	8620	11616	8254	8091	22259	11993	19091	13556	11222	11071	7797	7521	8302	5393	5100	4690	3494	3171
839.3	35984	29305	18027	11109	13885	20328	17013	16360	12294	13444	11400	15191	12114	9776	6242	7397	7387	27185	14032	10888	11387	12074	7614	12347	8846	11492	10084	8177	9015	9409	7355	9370	8853	7229	8029	20142	13911	18761	14977	11415	10953	8361	7855	8228	5506	4851	5017	3206	3461
841.3	32361	34635	15093	15265	15172	21813	15179	12871	13321	10291	10800	12342	11888	9209	7104	7335	6952	25500	12933	12668	10133	8000	7445	12707	8070	8150	10386	7951	9746	8589	6820	7661	10874	7292	8184	22643	14932	18740	15113	10586	10873	8041	7930	7095	5530	4616	5025	3444	3201
843.3	29955	33341	15159	13479	14735	19402	13041	13642	13368	12904	11281	16100	13309	9754	7374	6408	8163	24832	15701	12114	9172	7919	7494	12224	9542	11269	10341	7502	7583	9899	7483	7569	10149	7725	8592	19308	16742	18385	14141	11729	9368	8614	7167	8303	5627	4966	4563	3410	3212
845.3	34795	28082	18929	17798	16729	19312	14351	11904	13311	11741	12018	12211	12460	9832	6882	7729	7272	22445	13425	10634	9595	10555	8014	11475	7936	11420	8051	8583	9649	10228	5834	9689	10456	9864	7580	19373	16564	19362	13905	10888	10374	8034	7946	8330	5203	4885	4342	3425	3259
847.3	33921	32582	15981	18612	16871	18164	18742	16118	12185	11265	11081	16064	12404	10158	5317	8331	6218	25971	16500	11557	9889	9660	6837	12352	7862	9654	9712	7774	10047	9245	4781	8565	8894	7733	8010	22835	15539	19892	15018	11537	10257	8027	6472	8499	5452	5286	5145	3397	3343
849.3	36122	33221	13569	14287	14579	19098	17223	13780	13725	13099	12136	15440	13039	8896	6759	6617	7296	25990	16072	13238	9753	7768	7991	11775	9865	11176	9863	8250	7819	9648	7511	9878	10155	9940	8819	20543	14891	18039	14133	10008	10864	8235	8079	7882	5144	4883	5361	3549	2979
851.3	26499	32031	14088	18467	16546	20991	18730	15054	12068	12878	11362	14416	13390	9460	7504	7924	5943	26769	12183	14680	10782	10741	8000	12976	9380	11033	10434	7758	9686	8584	7474	9703	10601	7508	8544	21423	16249	18506	15214	11959	9831	8760	8014	8501	5502	5721	5292	3504	3382
853.3	36095	31276	19077	18210	15633	16926	14969	12819	12840	11666	11170	12299	12381	9770	7535	7570	8033	26929	15701	12591	10752	7994	7913	12110	7755	9505	9752	7485	9418	10088	7096	7125	9029	8610	7626	18204	16782	20214	13858	11753	11530	6473	8173	8070	5461	4974	5319	3308	3287
855.3	27061	31670	16751	18384	16833	23750	13470	12835	10858	10258	11447	13794	12116	10049	7596	8355	5526	27461	14252	13093	10024	9985	6744	11437	7333	9899	9911	8189	7974	8980	6822	8650	10795	7294	7512	22809	17038	18172	14594	11795	11139	7105	8015	8489	5572	5162	5345	3564	3391
857.3	33926	35525	16753	18575	17092	22711	14659	12660	14192	10961	11660	14958	13244	10094	7601	8315	8499	26568	13292	11656	9479	10226	7250	11562	9491	9737	7449	7733	9684	8356	8556	8086	11040	8863	8399	22413	14721	19700	15436	10847	11093	8606	7561	8168	5878	4928	5230	3408	3423
859.3	29444	34105	15323	18547	15352	18553	15991	15604	13227	12043	12246	12952	12602	9164	6732	6856	6295	25376	14782	14952	9110	7695	7165	12338	8416	10295	10572	7746	6813	9410	6579	8226	9703	9030	8836	22796	16718	19640	15352	11635	10630	8146	7837	8115	5623	4816	5550	3522	3315
861.3	34497	33692	14797	18365	16660	23388	14551	13824	13830	9909	11192	15785	13402	10237	6599	6850	6391	26263	13126	15460	8905	8164	8025	8645	9257	10759	10589	7912	10031	8828	7800	9820	11035	7522	8038	18781	18100	19353	14776	10586	11325	7665	8003	8433	5105	5567	4979	3538	3440
863.3	34328	37350	15118	14341	14930	21975	17908	14782	13288	13603	11511	12606	13303	10186	6906	7718	7669	26648	13016	13380	8850	9903	6344	12679	7870	9760	8962	7681	7706	9048	5797	7579	10338	6785	8968	21258	16247	18556	14759	11001	10933	8498	7812	7927	5632	4293	5040	3522	3410
865.3	32573	33377	18662	13386	16211	21885	14682	13503	10550	13552	11890	16656	13562	10167	7235	8119	5897	21664	14921	9946	8924	13020	7936	11886	7302	11030	8905	7961	9954	9333	4944	8603	10016	7282	8100	18857	16817	19834	14729	12012	11329	7590	7369	8344	5439	5525	4564	3702	3412
867.3	32911	33292	16294	15576	14661	21529	14742	16397	13368	13837	11490	15926	12436	8960	6947	7525	6411	25393	12716	14999	9188	7859	6126	12421	8053	11263	8550	8697	8671	10049	7616	8417	10738	9438	8506	21000	12262	19539	15337	11679	10021	8016	8400	8147	5584	5240	5388	3582	3484
869.3	34319	31983	14054	13200	15283	16221	18743	12402	10385	11341	12012	13661	12353	10419	7947	7208	8216	27752	12778	12850	11291	9847	7897	11747	8011	10798	8669	8541	9877	8088	7730	9204	8725	7050	8468	16140	12471	19517	15638	11242	11423	8045	7603	8404	5369	5381	4450	3485	3385
871.3	35502	34214	14767	17807	14174	21321	14783	13591	12777	10531	12274	11012	12783	10627	8411	7207	7266	25954	14973	12404	11841	8058	5731	12610	8294	7804	9954	7966	10135	8778	7551	8401	11046	7958	9169	22216	17046	18307	14825	12019	10984	7873	7889	8229	5953	4949	5097	3267	3560
873.3	37140	36984	17286	17143	14100	21800	12687	12752	12429	11340	11418	16418	13562	9510	7148	7235	5847	19648	12789	13572	9402	10537	8656	12759	7302	10148	8184	7996	9917	8643	6347	8877	9217	10004	9174	21961	14363	18215	15357	10967	9490	6945	8170	8803	5805	5607	5416	3357	3495
875.3	35652	32054	17070	13054	14218	22791	17477	12713	14529	10557	11891	12571	13657	10582	7046	8268	8379	27467	15955	12355	9054	9854	6435	12920	7340	11054	10572	8699	8867	8197	8301	7984	10064	8710	8604	23122	13571	17073	14372	12436	10840	8942	8373	6882	5803	4741	5635	3588	3578
877.3	36241	34812	19487	18725	15693	17141	17738	14384	13616	10866	12319	17473	13455	10382	5661	7861	7860	27845	13904	15404	9150	13431	7723	12149	8085	11163	8170	8411	10218	10091	7446	9514	9214	7948	8430	22567	15774	19896	15549	10168	11197	6612	7288	8620	5115	5951	5306	3269	3691
879.3	37120	29488	14504	14048	17356	19444	15891	12974	13219	12146	11792	13789	12098	10535	8218	7468	6075	27207	14750	11152	9075	9072	5647	11730	7275	10869	10313	9016	9846	7588	7727	8580	9405	9263	8711	21857	14272	18535	15880	11177	11298	6882	7778	8401	5799	5768	4960	3694	3776
881.3	34923	32902	14143	15448	15721	23690	18101	16237	13706	14582	11361	16734	11445	8976	8163	7423	5877	26296	13024	12720	9411	8460	8087	10502	7286	10387	10288	7921	8011	9539	8988	8407	9341	9341	8724	22640	13538	20101	15664	11781	11340	6341	8238	8173	6089	5219	5251	3733	3735
883.3	25756	34303	15563	19149	16194	17758	15154	13586	11610	11108	12172	13399	13255	9375	8247	8531	6699	28195	12774	15097	10760	7828	8347	12795	7916	11116	10645	8325	9428	9830	8576	8683	9539	8494	8303	22040	16336	21005	15774	11922	11043	6686	8082	6865	5514	5149	5598	3696	3647
885.3	36683	36358	18802	18761	13909	24365	15209	17553	12502	11187	10697	16669	14022	10295	8354	7397	8833	27653	14318	14354	10150	10717	8847	13052	9430	10618	10151	8072	10174	8010	8127	8913	8501	7204	9216	22945	16589	19256	15029	11637	10303	7415	8293	8250	5894	5119	5417	3797	3638
887.3	23409	26849	18198	17598	15767	22088	18359	13434	14819	12480	11955	16167	14119	10614	8456	8316	9021	26762	15357	13586	10794	9640	7599	13007	9042	10876	9452	7760	8516	9541	6294	7114	8509	8360	8086	21487	14220	20387	15625	11339	11266	7776	7696	6577	5784	5140	4606	3675	3170
889.3	27452	34711	14955	16545	16100	19631	14705	17106	11588	14258	11882	15393	13744	10211	7974	8808	6328	27053	13101	14219	8329	10767	8019	11011	7506	7796	10246	8164	10120	9428	9450	8469	9975	8733	9303	21658	13386	18783	15542	11828	11234	8068	6898	8692	5964	4837	5671	3482	3629
891.3	36884	34225	14532	17059	16155	17255	18408	13638	10998	10534	12272	17562	14407	10737	6387	7786	7300	27693	14552	13882	9144	7679	8631	12572	6872	8487	10022	8580	10274	9263	7622	7906	9935	9646	9313	22486	12737	18896	14397	9617	11133	7991	8027	8655	6131	5077	4844	3418	3641
893.3	33470	31042	19142	18438	17498	18815	18962	16346	11956	12084	12642	13269	14288	10773	8580	7415	6945	25498	13908	13567	9794	9726	9448	12417	7619	11093	9398	8140	8295	6406	8585	8305	10120	7403	9317	21495	12619	15394	15765	12189	11382	8783	8348	7534	5946	5047	5649	3760	3328
895.3	34402	36576	14041	16660	16189	19538	15350	16495	13477	11714	12535	11831	12793	10762	7046	7203	6974	21060	14197	15184	10254	12332	6013	12363	9583	11109	10613	9108	9051	8407	8403	8114	9271	7308	7593	20967	17946	20773	15864	10137	10405	7298	8240	8956	5641	5632	5237	3555	3775
897.3	36719	31240	15162	17258	15481	22202	17984	14492	12135	13600	12020	16075	14236	10577	8063	9413	7033	24443	16048	13562	8629	9143	7047	12353	10884	9283	9098	9466	10000	8748	8922	9857	8548	8801	8436	21808	17292	21610	14946	10793	10862	8928	8296	7649	5606	5786	5411	3892	3421
899.3	26253	33123	14743	16911	14755	17118	15067	13064	14390	11567	12303	16982	14731	11131	8003	7422	6433	21647	15306	10996	9315	9132	9036	12723	7860	9256	10377	8206	10150	9650	6324	8333	11247	9527	8750	22713	15937	19405	15535	11941	11235	8770	8598	8815	5538	5217	5457	3823	3796
901.3	35578	28726	15764	16960	15784	19728	17482	13338	13076	11100	12461	17893	13147	10602	7190	7086	6705	27096	14794	13555	12390	7873	8558	12495	7863	10886	9798	8938	10025	8631	6590	10679	10701	10151	7799	22015	14704	18530	15731	11017	11405	8613	8220	8162	5782	5870	5535	3453	3641
903.3	35599	34055	17055	14887	14661	18002	19246	18115	12041	11217	12305	14801	13908	10521	7457	8589	7765	23307	13337	13390	9872	9038	7861	12480	7830	10718	7830	8190	10367	7395	8609	10460	9340	7657	8839	22283	14162	20151	15274	11431	11253	8599	8468	8004	5957	5156	5533	3968	3904
905.3	31046	29192	18017	17474	15390	22673	13147	15352	13142	10117	12275	15755	12893	10858	8280	6846	8574	27414	15483	14010	8662	8272	7273	12785	12139	10796	10586	9278	8790	8573	7904	9006	9663	7253	9141	22145	17510	19035	14995	12076	10373	6796	8710	6990	5918	5408	4904	3218	3836
907.3	37314	31920	18099	18611	14875	17416	18061	14093	14269	12666	11540	17825	14385	10829	8561	8926	8651	27107	16127	15090	8688	7967	8448	11745	9591	7379	9411	9040	9710	10376	8070	9498	11239	7966	8768	22259	12367	18568	15602	11947	10821	7162	5969	8822	6099	5009	5208	3963	3419
909.3	30262	33854	14106	19465	17542	20280	14350	15919	12400	13652	12474	15142	10979	10885	7998	8980	8359	27413	15720	14069	11383	10991	8347	11706	7725	11021	9641	8868	9902	8008	5467	10022	9405	8369	8610	18576	16945	19825	15085	12281	10629	7710	8367	7232	5873	5774	5644	3401	3893
911.3	33085	34758	16779	17838	17133	20977	18206	14738	13188	14233	12656	17188	13926	11044	8753	8713	7514	27562	14988	13924	7974	8264	7465	12813	8773	11332	10988	9298	10173	6990	7081	10624	9881	9371	8308	20698	17503	16549	15173	11474	10579	8499	8603	9176	5679	5179	5454	3682	3861
913.3	34844	35793	18539	17845	14463	21205	13685	12127	13387	10248	12430	18179	13726	10070	8965	8988	8886	26365	13815	10045	10267	7751	5896	11391	7661	8405	9989	8328	7612	9396	8013	8890	10144	8525	8956	22055	14014	20094	15856	10195	11565	9042	8260	8992	6122	5408	5657	3604	3901
915.3	35572	32714	14501	16095	17906	21581	16588	13672	12173	14552	12691	18624	14679	11062	7724	7381	7012	27164	15254	12583	12135	9423	7562	12824	11046	7918	9806	8674	10012	7760	7932	8251	9278	8582	8979	22900	14346	20373	15007	11840	11327	8021	8318	8763	5963	5980	5612	3449	3983
917.3	35089	32946	19461	18793	14802	22368	12213	14142	14336	11802	12697	18124	14853	10000	8082	9141	8253	24476	15168	12524	10258	13397	6036	11582	9257	11234	10054	8044	10077	9786	8376	8354	10783	8706	9107	22585	14578	20423	16163	11973	11710	7615	8607	8537	5556	5290	5023	3942	3611
919.3	36050	34003	16320	18670	16628	22272	16236	14780	13554	11295	12395	17920	14678	11213	7192	8369	6267	28722	12665	13171	9438	10614	7629	12943	9163	9710	10703	7873	7899	9510	8645	7573	9730	8760	8098	22571	17052	19287	15099	11563	11256	6856	8573	8379	5946	5821	5377	4021	3895
921.3	37241	35209	18611	16691	15781	19021	17913	14819	15263	10193	12608	17787	12095	11235	8590	7150	6096	27099	14726	14462	12058	12244	9190	12981	9007	11201	10497	9496	8672	8022	6640	9115	11196	8476	9142	23019	12097	21920	15966	12056	11676	7509	7183	8807	5851	5839	5586	4080	3911
923.3	32571	29590	18459	18658	15847	20917	16621	16420	12279	11296	12477	15217	15149	11467	8155	8926	6488	25239	13051	13912	9980	8054	7419	12431	7768	9164	10198	8740	9828	7902	5957	10238	8945	7721	8882	22492	14760	18108	14583	11931	11113	6911	7957	9075	6200	6157	5218	3842	3586
925.3	31349	37706	16262	18929	15282	19598	15712	17315	13937	15074	13027	17811	14704	10023	8036	8427	7382	28071	13894	15182	10526	8540	6746	11065	9927	8895	10642	8851	8276	9789	9014	8478	11048	8533	9589	20153	15779	19217	15526	11890	10147	8821	8492	8333	5992	6042	5462	3703	3865
927.3	35424	33967	18129	18276	14890	17191	17374	14496	14967	14360	12323	14468	12419	10837	8280	9122	8880	28455	12292	15236	9614	8195	8283	12266	7759	9197	10510	8485	10392	10731	8525	8776	11193	7297	8304	21908	17801	21609	15838	12017	11490	8541	8377	8541	6334	4788	5823	3827	4029
929.3	36170	34531	17352	19267	15922	18425	17845	13918	13740	13428	11860	18253	12858	11342	8045	7629	9213	27706	14625	13845	13399	9983	9084	12534	9644	7078	10334	8758	7870	10120	5190	9966	9998	7721	9119	21982	12327	20429	15735	11373	10992	8928	8932	7722	6033	6282	5734	4078	3853
931.3	35112	38705	15655	18676	16800	19290	18302	15923	15601	11960	13588	17828	15098	9636	7740	9214	8932	27908	13371	14852	10366	9732	8687	11620	7268	11145	9267	8848	8239	7318	6242	8880	9265	8807	8930	16638	17197	19813	15486	10593	9479	7602	8580	8678	5422	5262	5936	3769	3911
933.3	36089	33137	14605	15565	15577	20195	17950	14936	14763	11087	12577	16745	14949	9442	8205	7797	6762	22644	15184	15058	8595	10904	8859	13337	9759	9290	10945	8608	9982	10289	8647	10742	9131	9449	9226	20870	16778	19433	16024	12045	11714	7624	8625	7207	5828	5211	5795	4028	4032
935.3	36012	33081	14479	18471	14319	22943	17895	16705	11549	10790	12480	18525	14988	11588	9507	9147	7553	27573	15186	11177	11581	8046	7405	12876	7645	10252	8577	9248	8682	9713	8551	8242	10820	7544	8406	23312	12717	21281	15919	10726	11316	8214	8799	9069	6135	5179	5738	4011	4016
937.3	32815	36895	16000	19447	16413	21398	16535	12630	13041	10835	12841	19473	14984	11703	8435	7157	8280	28642	14913	13328	9110	9591	6773	13162	9031	10105	10028	8141	9284	9859	6762	9900	10055	9245	8901	16655	16985	20078	15020	11612	11251	8914	8615	8537	5295	4492	5906	4234	4076
939.3	36178	35180	14820	18792	15684	24494	13249	14656	14130	14904	12640	18648	15078	11155	8443	9016	7388	28172	14584	12290	9385	9397	7763	13274	8150	10548	10458	8170	9246	10080	5167	8960	9704	8835	9389	22485	16079	19237	15464	11162	9092	9051	8442	9035	5929	5800	5818	4163	3956
941.3	35802	34547	19109	19148	14799	22335	16950	18422	13838	13243	12659	17391	15330	11531	8602	7391	6790	26987	14691	11253	11417	9266	6871	13489	9851	9331	8851	8510	8350	8590	5757	8886	10647	9557	8583	20716	16883	21039	16104	11572	11409	8371	7927	8907	6190	5739	5326	3976	3932
943.3	28838	36683	16578	16309	18021	16728	18414	14439	13925	11256	12622	13567	14250	10926	7242	9384	8337	24328	12921	12203	8392	7927	6934	12190	8127	10340	8819	9239	10240	8632	6004	8864	9633	7465	8859	22518	14601	20752	16492	12173	11115	8763	8510	8952	6521	5882	5611	4226	4162
945.3	37882	36453	19636	17760	16006	16767	18354	13124	13368	11302	11878	17678	15434	11417	8980	8971	7436	22748	16428	13711	12735	8061	6567	11666	8330	9887	10807	8141	9920	10269	8221	10313	10279	8396	8535	23143	14237	20159	16027	12081	10672	7771	8704	8621	5814	6038	5620	4088	3987
947.3	35140	35125	14491	14986	16365	22385	15952	13575	14845	13217	13234	15444	14650	10779	9268	9081	9428	26868	14094	14819	9276	8996	7764	12836	9792	8461	10866	8106	10298	9564	7808	8564	11464	9819	9534	18320	14622	21504	15946	12021	11678	8195	7868	7041	6126	6053	5578	4202	4113
949.3	37239	30370	14759	19320	15831	18704	16177	17133	14131	15591	12888	17054	13384	10472	8097	8060	9160	27914	14890	12490	9053	12833	6753	11316	8795	12010	10650	8288	9833	9253	7510	9255	10867	9333	8446	19345	13163	20246	15269	12087	9133	8770	8453	8136	5923	5423	5949	4200	4082
951.3	24407	33324	16515	18830	14316	23717	13457	13778	12041	11078	12656	16084	15593	11667	8623	7721	7524	27992	15041	13764	9243	8615	8475	13006	9014	7384	10912	8072	10401	9377	5930	9424	9163	8280	8926	22391	14640	19875	16184	11232	10976	7458	8500	8839	5619	5689	5796	3889	3441
953.3	36873	32391	16903	18595	16518	19112	16415	16609	13076	14051	12485	18164	15806	11653	9353	9109	8618	26569	15888	14850	11253	12723	9366	12381	7568	10377	11380	8290	10487	9812	8588	8738	11240	8917	8164	22061	14177	20725	16435	11971	10001	8057	8757	9331	5572	5806	5492	4207	3948
955.3	36695	34281	17843	18020	15824	18027	18720	17727	14025	14872	13739	18955	15702	10939	9076	9196	8647	28378	12902	14342	8957	11154	7799	11456	9495	10911	10779	8977	10171	9716	8668	10718	10876	8518	8639	22760	15631	21205	15683	11716	11455	7780	8720	8813	5915	5437	5866	4391	4163
957.3	36265	35216	16434	18553	16370	20993	16071	14657	13727	13100	12948	19069	15874	11309	9764	9494	7585	22483	13154	13601	10601	8903	10887	11464	10506	11195	10325	8457	10215	10686	8045	10580	11490	9277	8644	23149	16791	19248	15645	12185	10208	8846	8436	8738	6095	5493	5755	4188	4271
959.3	37454	29058	16370	14326	17123	19122	19987	13440	12117	13003	11937	18803	14838	11152	6571	8086	7136	22182	15828	13698	10360	8874	6437	12715	10065	9057	10311	8559	9850	9087	8455	9055	11018	9034	9617	22033	16631	20127	13692	12084	11816	9117	9208	8816	6327	4919	6005	4122	4167
961.3	34508	30881	17877	18823	16893	23212	19185	13193	12550	13060	12944	16826	13323	10288	9494	8656	8365	27684	10936	13433	10463	12453	7095	12173	8110	10833	10717	9677	9800	9326	8430	9873	9860	9365	9701	23631	16833	21950	16454	12561	10978	8057	8808	8528	6327	6397	5968	3967	3583
963.3	33368	33373	16972	17621	17692	25020	16719	13405	13630	13656	12979	16003	15337	12191	8581	7926	6220	28164	13605	12540	10262	10613	6853	13074	8828	11493	10434	9039	9956	10165	8292	10369	10590	10412	8639	16313	17414	20017	15608	11750	9746	9178	8060	9182	6176	5296	5588	3735	4324
965.3	33920	37730	14444	19628	14608	24735	17632	13295	13009	10968	12447	19236	16170	10824	8685	8231	9086	27483	15360	15641	12520	8306	7351	12768	8687	11022	10582	8927	8271	9514	6101	8933	9521	8635	8712	21163	17742	20165	15786	12499	10360	8035	7323	8296	5507	6054	5929	3630	4149
967.3	26829	35619	18158	15590	16491	25616	16143	17375	13015	15439	12210	20134	15769	11234	9467	8485	9284	28170	14920	15096	8412	14332	8220	13279	8600	11586	10987	8150	10382	7171	8704	8589	12184	8081	9356	21810	17666	19584	16384	11150	11326	7451	8647	9172	6058	6300	5287	4148	4202
969.3	31917	36675	17535	19701	15124	22326	15748	12869	14886	12751	13085	19439	15628	11705	8254	8416	6883	27386	15436	13597	8473	10634	6864	12862	7506	10927	10283	8577	9052	7702	7918	10455	11941	8884	8295	22668	12377	18508	15766	12437	10853	9216	8042	6290	6254	5089	5808	4201	4120
971.3	37802	33975	19408	19562	14436	22472	15866	16228	12956	11589	13721	19756	16051	11728	9740	9307	6198	29048	15726	15015	11762	11384	9979	13326	7588	7894	10458	9080	9499	8216	7346	8888	9257	9217	9040	23151	17196	19538	16173	12167	11724	7919	8450	8533	5998	6397	5696	3950	4111
973.3	29420	37563	18855	19287	16529	24290	18401	14202	15419	13839	12396	19340	15005	12109	9408	9363	8469	28187	14798	14236	10509	12027	10788	11541	8341	11015	8282	9292	10504	9789	8808	8182	9651	8150	8526	23002	16601	21076	16038	10695	11230	8904	9192	8266	6477	5586	5853	4107	4360
975.3	37336	35043	13931	19671	18860	23945	17400	13635	13959	15114	12965	16482	13360	11910	9435	9789	7606	28861	16964	13807	12621	10051	10047	12995	9137	9688	10789	9126	10376	9823	6410	9482	10271	9232	8630	23339	16155	21418	16297	12347	10695	7881	8458	9190	6369	4880	6111	3947	4060
977.3	36138	36192	12535	19243	14307	18493	12351	14543	14971	13460	13731	19034	15776	11385	8966	9797	7559	28610	14582	15689	12622	9244	8654	13081	8749	8101	10806	8636	10097	9053	6749	10652	10127	8145	8676	22880	16569	21387	16158	11638	10470	8624	8727	8898	6297	6062	6182	3859	3562
979.3	36067	34867	17310	15603	17760	20131	16994	17724	13971	11640	12213	15521	13956	11263	10062	7315	9008	28116	16392	15449	11373	8177	8394	13011	9745	11807	9280	8217	10427	10097	5904	10406	11697	8276	8964	20044	15124	18697	16333	12698	11970	9210	8694	7852	6263	6054	5908	4274	3705
981.3	36355	32308	18473	19003	14303	21299	18397	13240	15263	11057	13125	17617	15914	12532	9924	8438	6918	26768	16192	14625	10238	10935	8241	13258	9575	10150	9958	8989	10561	8603	7428	11021	11605	9979	8855	17654	15389	20609	16843	12082	11364	8372	8886	9503	6396	6071	5499	3966	3367
983.3	37836	36807	15142	16185	18442	19886	14501	13884	15367	11682	13722	14814	16076	12371	8886	8339	9524	28536	15266	13160	9080	12912	9516	13224	11114	8169	10463	8689	10514	8372	9610	10805	11395	8394	9588	19969	16330	18503	15434	10625	12095	8076	8659	8526	6334	5450	5959	4383	4290
985.3	34579	34474	14966	15513	16210	19395	15316	13601	13560	11701	12681	19444	14236	11802	8798	8239	7506	28947	15995	14779	10564	8467	7783	13105	11418	11616	10996	10021	10443	10553	6893	9274	9805	7621	9606	20788	16871	19826	16356	12980	11044	8842	8684	8476	6230	5893	5772	4487	4359
987.3	30268	33377	14605	20005	17490	19290	19546	18890	12879	12550	13336	17494	14813	12274	9809	9388	8900	22837	14622	10708	12040	12044	8200	13616	8823	8674	9166	8191	10660	8544	6171	9451	9365	7902	8693	22785	16128	17135	16587	12062	11064	8507	9203	8638	5769	5950	5868	4269	4436
989.3	36739	36869	16628	18493	15796	24159	18726	17505	15731	15346	13140	19675	15803	12154	8954	9671	8870	27058	17030	15406	10604	10630	8199	13262	10719	10921	9949	8102	8229	11034	4472	9390	9618	8035	8298	22024	17572	20145	16195	12225	11895	7996	8418	6117	6125	5889	6169	4584	4343
991.3	37139	28638	15434	14686	16052	21586	18889	14458	12441	15998	13528	17825	13821	11127	8700	9465	9406	27742	15355	12966	8614	8937	6569	11293	8380	11039	11005	8331	8984	8765	5493	10780	10481	7794	9603	19445	16623	20453	16158	10578	11906	8120	8915	8972	6306	5726	5837	4365	4068
993.3	32365	35777	16556	19573	16203	17674	18493	17879	11602	15706	13606	15661	15513	12570	10160	9429	9553	28126	13267	14559	11376	8720	9360	13309	8640	11640	10668	9408	9976	9950	9912	8387	9683	7952	9547	22583	12266	17888	16308	12429	10688	8882	8854	8882	6344	5763	6017	4613	3697
995.3	37163	36549	15837	16933	16572	19821	19068	13366	13291	13996	12369	17207	14537	11427	10007	8434	9543	25909	15989	12933	13229	8751	8818	12691	10485	11537	10334	8361	6715	10519	8437	9651	10630	9558	8810	21243	16242	21490	16353	11915	11168	6910	8880	8995	6374	5839	5472	3704	4383
997.3	30232	33098	14967	19652	14519	24238	17618	12727	16277	11364	13372	18816	16190	12326	9297	9159	6738	23345	15470	12561	9799	9988	9206	12821	8178	11305	9716	8554	9736	10357	8745	10477	10176	8826	9378	23359	13181	20479	14832	11475	11637	8447	8853	8926	6453	5931	6104	4704	4429
999.3	22392	33034	17754	19609	14941	18521	18840	14493	14364	14490	12741	18756	15477	12212	9020	7641	6807	25878	12661	14541	10032	11743	6015	12366	9686	10531	9485	8507	10542	10403	8713	9691	11234	8131	9599	23353	17601	19850	16045	12143	12038	9138	8757	8694	6498	6359	5615	3790	4420
1001.3	35708	35443	17184	19313	15744	16554	14582	17736	14286	15796	13398	17596	14904	11540	9819	10068	7591	26618	12842	13839	9868	12453	8681	13507	7930	11574	11128	9766	10729	8467	9733	8527	10916	8371	9543	22927	13232	19415	15643	10081	11774	8054	8897	8697	6251	5836	6059	3902	4410
1003.3	36524	36651	17039	17189	18006	19635	18685	13232	12583	13059	13351	21572	15349	12279	9351	10038	9666	23679	13426	11418	10612	8323	6833	13433	10228	11593	9580	8263	9666	9313	8207	10705	11352	8288	8606	23645	14531	19753	16568	12327	11922	6890	8996	9428	6421	5962	5986	4678	4487
1005.3	35485	33292	17524	19054	16279	21552	16921	15689	12011	11120	13340	20320	15092	12427	9557	9094	7115	28271	14730	14317	10881	10522	7673	12597	8613	9048	9651	8026	10634	9949	7877	10526	9670	8865	9522	23850	14395	20785	16194	12240	11052	8174	8798	8805	5511	5243	5827	4422	4491
1007.3	23067	31672	16404	19854	14936	19429	19399	16227	14462	13720	12378	19621	15559	11198	9420	10010	8870	28195	14958	14357	11715	10969	9181	13560	7859	10697	10641	9419	10488	8398	5141	9865	10193	9761	9067	23405	16495	18285	15545	11065	11733	8962	7257	6674	6457	6036	6235	4676	4474
1009.3	36078	37475	17493	19627	16742	20684	18855	14134	14266	15545	13427	19999	14398	11834	9424	9361	8265	26211	14026	15709	11558	8285	8296	12803	8672	11806	10977	8709	8587	10328	9720	9302	11250	9099	10008	23665	18087	18538	16353	12686	11873	9202	8762	7826	6626	5550	6220	4075	4278
1011.3	32754	33555	18103	17942	16373	19154	18148	14206	12873	13362	13702	20855	15597	12168	8948	8842	8112	26206	13512	13732	11151	8707	8192	13665	8430	10122	11173	9514	10485	8978	7184	10629	10338	9569	9176	23911	16313	21881	16009	12812	11894	7726	8981	8787	6327	6248	6279	3796	4637
1013.3	36247	33328	17681	20030	15262	22073	15981	17408	13630	12443	13060	16508	15697	12011	9368	9896	9891	24629	12798	13036	9432	9298	8615	11701	8850	8958	11023	8652	10097	9927	8001	10300	9738	8068	9312	21384	14560	21089	16672	12391	9604	7313	9308	8180	6362	6525	5790	4726	3588
1015.3	30180	31678	17958	19299	15336	20242	16547	13593	15989	13108	13852	17692	16497	12188	9715	10379	7575	26788	13164	11374	10478	8242	8029	11513	7884	11705	11027	8639	10262	9701	8573	10388	11636	8525	9427	23108	17616	19019	16689	13052	11978	8246	8810	8948	6533	5756	6242	4683	4694
1017.3	38306	32238	16092	19901	18313	17565	14362	14511	13654	14819	13350	20823	15770	12678	10271	8498	7102	27447	15178	14441	9284	9977	7005	10353	9288	11410	10767	9373	10821	8493	9278	10816	9695	9344	9626	21264	12264	19747	16621	11343	11362	7410	8854	9266	6323	4627	6074	4804	4244
1019.3	21833	34076	16283	19972	16831	20835	19447	15814	13356	12988	13327	21677	15333	12485	9617	8084	8806	28814	14836	13856	13305	12084	8590	14148	8611	10050	10958	9808	9790	10274	7532	8765	9882	8766	8511	18296	15070	18642	16009	12374	9797	8238	8325	7945	6449	6224	5929	4590	4019
1021.3	22252	36360	19909	18609	17159	19926	14448	13765	12251	11740	12711	13234	13148	12498	8770	8683	9237	27817	11968	13404	11011	10436	8725	12989	8990	11300	10398	8784	10494	9310	8284	9613	9449	10377	9544	22735	16957	18807	16603	12215	11947	8104	8786	9241	6469	6297	5970	5023	4030
1023.3	28933	32946	18499	17042	15729	18773	18394	12941	15885	15501	12829	20770	16515	12770	8818	10290	7283	27412	12275	12619	9069	8408	7546	13858	8588	8499	11026	9487	9294	7813	9930	10171	11967	9387	9394	23833	15959	20663	16453	12509	12017	8102	8762	9411	6565	5723	5599	4719	4268
1025.3	24411	36466	18865	18016	14639	19055	16391	14492	15945	12273	13240	18423	14760	11367	8271	9769	9358	21188	13850	11920	12706	9090	8845	13495	7732	11448	11168	9257	9429	10527	6056	9105	10747	9814	8520	23309	17984	19635	16284	13383	11721	9073	8740	8721	6687	5734	5663	4659	4444
1027.3	34409	32908	16166	19915	16365	21503	15307	18327	13200	12302	12946	15087	16382	11152	9165	8845	9970	28702	13065	14761	10454	9487	6643	12242	11541	11634	9228	9432	8385	9730	5305	10595	9877	8210	9362	23628	12403	21751	15994	13092	11565	9087	9079	7291	6158	6407	6038	5091	4628
1029.3	35978	31177	13502	18533	17715	24424	19681	13608	12207	11626	13495	20647	16347	11447	9974	8935	9487	27498	14718	14498	9380	12754	6089	13811	10407	10953	10807	8685	10738	9584	8555	9939	9984	10084	9839	22787	17861	20173	16610	12708	11601	8947	9191	9070	6493	5344	6164	4544	4643
1031.3	35977	37149	14588	16853	15121	22473	16928	15207	15169	11345	13178	20795	14400	12610	9081	8597	9513	28116	11706	11567	12525	8679	8087	13019	9659	10438	10816	9602	10433	8941	5348	9874	11052	7956	9121	23949	15726	21574	15636	12761	11314	6919	8982	9137	5137	5326	5866	4831	4533
1033.3	34884	38541	18684	16895	15862	23613	18524	13813	15578	15710	13319	21584	14935	11346	8435	8653	8652	27370	12975	15571	12963	12361	7598	11155	8463	11552	10881	9833	9125	7678	6901	9781	11345	9749	9555	21967	16925	19119	16430	12250	12149	7479	9137	8622	6472	6537	5941	4220	4316
1035.3	36918	35643	20247	14416	16138	24724	20527	16365	14115	14829	13782	22254	16626	12465	10217	10978	7134	26603	16499	14362	9456	8251	8300	13671	8584	11281	8386	9156	10979	8652	7583	9790	12103	9239	8444	20670	16648	20976	16132	12924	11714	9028	8721	9557	5880	6015	6082	4536	4576
1037.3	35992	31351	16140	18399	17025	19470	17563	13700	14677	12433	13577	18017	15718	13073	9050	10751	10122	28315	15758	15504	8798	10433	6581	11129	8400	11751	11323	8343	10167	8195	8943	10838	10143	8786	9704	22734	18126	20948	16556	12653	11991	7760	8844	7395	6494	6520	6210	4744	4566
1039.3	37315	33955	18707	19480	16028	21427	19451	14840	14297	15706	13740	19907	16803	12966	8710	8798	9720	23476	14123	13751	9390	10556	8101	13841	10455	8639	9570	8150	9205	9323	7260	8465	10268	8877	8989	23486	15525	19815	16732	11656	11966	7457	9187	7958	6653	5613	6474	3724	4650
1041.3	38478	32413	17580	16336	18699	24980	17886	14424	14315	14739	12921	15302	15564	12482	8833	8276	8020	27971	16300	15877	10841	11689	6088	13650	10258	11654	8327	8789	9076	8559	8732	10774	11869	9676	9403	20229	18126	20283	15674	10388	11566	8465	9192	8792	6453	5549	6230	4611	4700
1043.3	37211	35935	14760	20154	15060	22489	16037	15096	14342	15582	14007	20382	15794	12406	9815	8096	9124	27169	16195	14134	9471	12600	6656	13694	8620	11120	11021	10012	9674	10295	7354	9847	10764	9023	9217	22733	12333	20676	15064	12546	10495	8477	8181	9646	6685	6486	6262	4123	4196
1045.3	36327	33993	19902	19321	17481	23862	19079	14374	16081	14241	13530	20266	14202	12699	10391	9552	8114	25404	14289	14962	9033	10736	6495	13840	8711	11838	11026	9310	9763	9178	8585	10775	11606	8723	8925	18686	13261	19054	16233	12276	12227	9242	8025	9264	6835	5975	6453	4856	4494
1047.3	33086	33402	15158	18723	16422	20358	18829	15427	15273	15595	13632	20239	17045	12425	9949	10455	9219	26362	13347	13285	12020	11169	8250	13788	9051	12002	9204	9390	10735	9744	8205	10664	9237	9339	8872	23606	15226	21066	16768	11437	11447	8613	9170	9029	6479	6412	6223	4732	4802
1049.3	36487	38589	15632	19499	14765	17373	19738	15528	15381	15853	13189	19038	16509	12786	11242	9051	9660	22267	11582	11438	11161	14075	7724	13561	8523	11298	8377	9814	10788	8064	8321	8785	11227	9691	9879	19491	14666	20870	16749	12124	9909	8759	9103	8772	6632	6113	5798	4756	4504
1051.3	31152	33447	17828	19817	15266	26263	17153	14243	15827	13020	14138	21692	16323	10482	10279	7313	10152	27690	16864	12341	9334	8795	8887	13580	10375	9548	11459	8765	10718	8223	8408	9621	10523	9216	9922	22539	14466	17819	14790	12794	11323	8936	9182	8749	6838	5495	5993	4997	4756
1053.3	37204	32240	17113	20255	18329	22470	17083	18273	14890	13254	13856	20962	17381	12465	7678	8575	6296	24166	14142	14127	13192	10957	8098	13649	10466	11574	10199	9124	9484	8177	9683	10202	11077	9410	9432	22164	17041	21486	15459	12521	12116	7257	9062	8655	6702	5487	6337	4665	4810
1055.3	36381	33196	18343	20260	16734	23432	16303	14522	15171	12443	13912	21891	16966	12185	9652	7663	9296	22170	11194	13418	10528	10019	10255	13304	7755	10681	10495	9298	10644	10530	5791	10981	10880	9664	8620	22585	14297	19170	16643	13200	11419	9305	9285	8896	6384	6218	5968	4979	4565
1057.3	36877	34436	13670	17197	15084	18856	17003	17493	13454	11474	13644	21591	16560	12604	10395	10686	9904	28487	16159	14860	11675	12303	7343	13381	10226	12168	10763	8419	9522	10214	8194	10733	12046	8462	8984	22617	16888	22121	16806	13100	12014	8344	8381	9560	6541	5965	6254	4026	4798
1059.3	38260	32599	17886	19412	16273	23471	19574	14348	15977	13132	12818	19483	16890	12707	9758	8516	8628	28323	16183	12652	10033	12289	8764	13676	9887	7893	9713	8882	10510	10106	6816	10588	12406	8743	9804	17005	18671	19087	16503	12345	12290	8838	8481	9153	6283	6479	6357	4599	4571
1061.3	35728	35624	17389	19017	15679	26544	14880	13540	15217	12771	14081	17883	17205	11780	9581	9089	9942	27655	16095	15426	12502	12417	7195	13722	8396	11698	10623	9015	10711	8575	5122	8991	10078	8434	9340	21858	16827	20317	16013	12872	12188	8913	9119	7426	6622	5825	6191	4591	4528
1063.3	36881	33898	17522	19675	15317	17319	19005	15663	14059	11442	13802	16564	14572	11277	9750	10562	9025	28382	15416	15474	11095	12263	6556	14027	9441	8955	11190	8739	10814	9745	10096	9181	10200	10091	8776	23438	17680	19282	16758	12875	11831	8937	8767	9572	6906	6458	6039	4922	5020
1065.3	23127	32008	16943	15373	15867	20065	19825	13572	15132	11450	14074	22623	15432	12870	9666	10099	10275	25886	16189	15041	10570	11183	8467	13909	8028	11724	10378	8411	10744	7357	8006	10703	10884	8402	9450	23055	12594	20390	16776	12754	11910	7988	9052	7980	6432	6244	6040	5317	4849
1067.3	37908	33167	17884	19654	17799	23400	17476	15397	12287	12417	14115	21686	17256	12119	10435	9094	9660	27850	12458	16119	12476	8502	7147	13436	8597	12670	10445	9797	10588	9287	7900	10677	11563	9067	9036	20078	16300	21464	17068	12558	11872	7123	9259	7950	6529	6445	6123	5165	4807
1069.3	36925	36726	17637	19552	14838	23797	17865	14271	16175	12421	13985	22042	16996	12836	9611	10333	7140	26427	14773	14799	12859	9736	8171	13904	8847	9047	9820	9250	10258	10320	6953	9749	9705	8887	9970	22642	17377	21414	16465	12518	10088	9607	9488	9004	6589	5649	5615	5070	4874
1071.3	35967	35456	17530	20358	16661	25464	17249	13930	12784	15607	13817	21837	13562	12879	9058	9455	9326	26219	14099	14573	12395	10887	8608	11760	8348	9450	8649	9162	10111	10225	8200	8916	11895	9099	9756	17726	17878	18663	16531	12207	11303	8712	9481	9174	6572	6728	6190	4797	4744
1073.3	38044	33575	18929	14219	17204	18623	17790	18723	14231	16143	14214	18378	17497	12831	9239	9488	9651	28719	15039	15615	9193	8573	7762	14127	9150	11585	11022	8444	9951	10395	7730	11669	9794	8573	8982	23849	17438	21805	16289	12675	11590	5611	9162	8297	6771	6339	6408	5100	4792
1075.3	38763	32701	16429	17865	16848	22407	19645	18991	16564	14889	12745	15389	14720	12884	8505	8614	9794	27045	12768	16590	10850	9679	6453	12991	10633	8374	11177	8321	10907	9225	6190	10512	11838	7969	9895	21999	17697	17164	15933	13313	11411	7608	8927	9092	6817	6076	6038	4754	4613
1077.3	37739	29935	17643	19680	16695	26412	19414	15683	14969	14209	14398	20795	17858	12964	11320	8840	8280	26414	13991	15799	11190	8355	7065	14072	9132	11580	10552	9091	10959	9515	6800	10619	10275	7955	10054	21333	16314	21998	15325	12734	12053	7716	9353	8473	6630	5992	6584	5118	4886
1079.3	34773	29339	17341	19617	17150	19328	18837	16900	16180	11396	13920	19787	17267	13522	8962	9841	8885	27827	15406	15753	8578	11750	9493	13485	7918	10956	10463	9085	9407	10033	5485	10625	11159	10306	9492	22641	16787	21733	16412	12674	12120	9481	8648	9360	6611	6760	5725	5116	4300
1081.3	36181	36480	19683	19889	15468	26082	17595	14416	12521	13632	14654	21280	14802	13354	9350	10030	8110	28274	11682	12629	11118	11053	9569	11981	8732	11947	11301	8333	9787	10153	7994	11226	11906	8342	9115	23034	14506	19826	16455	12094	9779	8138	8678	9321	6279	5844	6004	4341	4665
[truncated: 43 more columns]

## Sheet: plate2
Set Temperature
Excitation: 450/9.0, Emission: 482/9.0
Optics: Bottom, Gain: 85
	[Scutellarein]:[a-Syn]																		[Luteolin]:[a-Syn]																		[7,8,2'-trihydroxyflavone]:[a-Syn]
Time, min	0.25:1	0.25:1	0.25:1	0.5:1	0.5:1	0.5:1	0.75:1	0.75:1	0.75:1	1:1	1:1	1:1	1.25:1	1.25:1	1.25:1	1.5:1	1.5:1	1.5:1	0.25:1	0.25:1	0.25:1	0.5:1	0.5:1	0.5:1	0.75:1	0.75:1	0.75:1	1:1	1:1	1:1	1.25:1	1.25:1	1.25:1	1.5:1	1.5:1	1.5:1	0.25:1	0.25:1	0.25:1	0.5:1	0.5:1	0.5:1	0.75:1	0.75:1	0.75:1	1:1	1:1	1:1	1.25:1
0.63333	1143	1012	1033	809	767	836	632	460	631	572	503	632	440	512	420	415	501	341	1143	1209	1164	791	755	907	698	610	613	571	499	481	430	608	624	681	432	575	1022	831	946	763	747	797	614	538	593	514	569	493	398
2.63333	1137	770	817	808	662	664	517	521	589	456	420	443	411	437	516	467	443	377	998	885	1059	686	658	708	613	606	450	446	413	502	387	502	407	575	480	591	936	850	842	663	740	523	698	450	712	505	561	451	441
4.63333	1032	864	933	725	599	692	525	482	692	493	551	465	318	489	475	317	458	314	948	1107	1037	588	730	774	455	524	507	393	389	500	475	411	684	525	497	628	772	730	992	706	523	645	596	282	640	485	505	389	155
6.63333	1063	933	779	917	579	888	690	460	703	473	505	409	487	400	292	415	366	445	987	906	1005	732	697	715	636	499	587	496	415	348	557	457	695	406	481	666	631	716	789	520	664	838	456	640	509	500	458	291	449
8.63333	960	898	831	766	808	823	619	588	774	588	561	506	587	578	504	331	494	454	863	965	949	726	880	793	529	583	542	550	471	463	630	293	419	595	706	788	691	635	624	508	674	711	522	370	636	540	508	601	415
10.6333	1018	817	821	658	528	790	613	524	742	427	679	582	718	460	547	701	264	490	742	897	1121	785	843	768	660	482	619	638	478	395	640	392	746	554	632	511	614	575	718	519	433	590	460	168	614	484	430	347	321
12.6333	882	786	763	777	600	615	570	595	894	602	678	574	417	552	631	503	716	537	914	926	959	904	749	814	599	632	574	494	510	556	479	445	780	599	496	658	664	893	712	589	596	650	516	472	431	567	631	366	314
14.6333	967	755	722	705	743	694	804	674	813	551	595	468	394	418	539	493	485	541	635	820	956	819	689	753	747	557	691	542	701	527	648	450	1121	856	621	711	551	759	703	605	416	474	563	330	573	576	437	267	266
16.6333	953	812	782	855	654	514	765	673	895	464	680	434	490	444	529	553	657	551	803	877	1019	881	724	882	570	675	605	708	534	624	624	457	701	446	719	635	749	748	797	625	609	739	577	531	396	557	470	420	475
18.6333	1025	809	774	706	572	613	997	622	823	493	525	350	348	583	522	678	363	455	638	795	931	890	752	882	779	680	697	651	575	556	815	473	911	471	570	655	760	836	792	409	431	489	405	185	593	619	519	497	499
20.6333	1018	871	862	1155	547	739	1052	731	1080	596	923	464	480	454	595	379	690	484	753	921	741	963	666	1400	687	630	739	712	758	446	711	437	818	612	766	772	714	991	648	457	668	804	546	251	522	850	528	648	376
22.6333	1348	823	824	996	810	987	1202	740	1237	669	698	430	712	737	791	488	639	607	750	978	1133	952	688	1197	752	743	696	716	823	627	665	443	802	739	747	812	761	952	829	594	564	669	423	549	288	677	488	485	563
24.6333	1302	1029	724	1162	713	882	1608	666	1290	532	1136	421	804	821	799	713	1132	831	996	1454	832	953	765	1709	765	856	799	667	910	673	743	489	1185	726	851	802	937	1235	1133	831	500	705	613	406	720	794	590	820	393
26.6333	1153	982	651	1801	632	962	1882	938	1409	524	1411	318	1117	963	940	637	1163	823	987	1313	1158	1168	869	1971	781	1070	833	704	991	672	616	465	989	669	858	1017	891	1072	1052	933	545	956	554	571	608	849	560	914	744
28.6333	1080	1267	887	1830	853	1104	1856	1438	1662	735	1182	435	762	826	1080	633	1129	826	939	1668	1422	980	913	2153	907	1001	803	796	923	614	819	453	1301	860	1010	1230	1159	885	1133	844	669	1063	526	675	434	823	707	1120	689
30.6333	1868	1534	854	2157	1183	1296	1919	1725	2261	870	1372	423	1078	1105	1294	649	1802	817	895	1620	1368	1522	1001	1453	1130	1121	860	786	1216	653	605	587	1537	1031	1299	891	1246	1414	994	897	359	972	675	1226	609	952	748	1295	662
32.6333	2017	1588	983	2193	1164	832	2701	2081	2407	774	1886	459	868	1424	1443	1001	1914	1155	1208	2058	1459	1689	857	1363	945	1132	984	857	1188	710	757	588	1914	957	1610	1456	1130	1102	1102	1149	997	961	604	816	594	1016	693	1267	899
34.6333	1712	1566	1030	2764	1334	1238	1852	1513	2418	935	2007	375	1057	1277	1506	795	2575	882	1125	1623	1324	2059	1162	1388	1062	1784	1013	939	1052	751	865	612	1950	1317	1741	1517	1232	2192	1362	1541	824	1308	818	658	458	1270	672	1444	860
36.6333	1716	1440	745	1765	1304	1481	2016	2066	2583	737	1227	324	1956	1432	1794	1021	2236	1291	1106	1997	2019	2017	1266	1597	1236	1781	1181	905	1652	726	1031	647	2582	1728	1621	1631	1170	2495	1461	1309	885	1131	758	597	881	1310	806	1416	693
38.6333	1621	1656	980	2807	1470	1132	1837	2087	2753	958	1700	385	860	1653	1724	1387	2604	1568	1415	1892	2099	1934	1276	1687	1192	1662	1402	860	1356	789	1086	821	2243	1980	2017	2101	1597	2229	1774	2001	1091	1823	866	510	679	1468	656	1422	1040
40.6333	1850	1871	1121	2329	1975	1888	2058	1535	2685	1056	2132	338	1356	1461	1863	763	1169	1419	1145	2187	1366	2242	1355	1814	1167	1842	1435	1057	1463	714	1082	885	2240	1896	2183	1949	1791	2007	1812	1581	1294	1404	639	810	728	1722	795	1400	752
42.6333	2068	2185	879	2013	1790	2051	1881	1263	2892	1293	1886	409	2365	2064	1938	1194	1415	1709	1598	1880	2229	2369	1240	1444	1226	1696	1534	1064	1655	692	1199	895	2687	2126	2279	2417	1684	1454	1312	2274	1530	1466	946	560	1521	1554	1287	1774	913
44.6333	2090	1412	985	2394	1628	1564	2080	1346	2735	1306	2386	388	1039	1904	1865	1371	1090	1485	1746	1949	1700	2537	1574	1412	1570	1062	1577	1068	1382	942	904	986	2551	1822	2570	2371	1962	1610	1448	2126	965	2574	1004	753	695	1593	896	1683	922
46.6333	2275	1373	968	1972	1681	876	1695	1213	2791	1276	2300	377	2556	1489	1255	1634	2364	1347	1835	1869	2297	2256	1673	1400	1171	1804	1511	792	1678	923	1368	1037	2603	1870	2666	2614	1931	1407	1677	1774	1382	2006	1123	1734	688	1683	1196	1453	737
48.6333	1399	2164	1151	1183	1644	1120	1604	1363	2583	1095	1892	418	747	1937	1756	1207	2753	1933	1615	1993	2036	2488	1728	1898	1461	2275	1633	1573	1602	956	1446	1256	2787	2366	2003	2307	1845	1317	1592	2585	1689	1727	1228	999	872	1638	979	1448	1390
50.6333	1785	1570	919	1246	1149	994	1818	1798	2679	1673	1636	355	1007	1982	1638	1084	1710	2189	1658	2156	2775	2106	1555	1696	1275	2042	1649	1263	1808	1002	1426	925	2989	2069	2225	2234	1850	1435	1904	2446	1705	1838	991	573	1076	1772	1224	1556	1133
52.6333	2079	1361	1137	1764	1819	1501	1538	2075	2628	1406	1598	327	1485	2092	1365	1144	2381	2231	1781	1990	2629	2300	1683	1764	1587	1239	1803	1678	1648	971	1569	946	2372	2016	1687	2358	2152	2234	2060	1747	877	1904	1086	360	705	1702	1015	1537	1517
54.6333	2883	2095	1145	2230	1754	2061	1615	1481	2682	1321	1578	337	1138	1969	1386	1485	1798	2095	1449	1608	1675	2292	1694	1529	1584	1889	1906	1771	1612	1019	2145	1230	2345	2058	2404	1519	1838	1500	2401	2630	1714	1569	924	557	935	1647	1249	1087	617
56.6333	2624	2035	1121	2282	1752	1349	1495	1780	2710	1437	1859	358	1639	2043	1217	1281	2469	2284	1789	2129	2880	2376	1754	1659	1472	1896	1839	1404	1718	770	1527	1049	2351	2270	1937	2295	1787	1993	1557	2164	1647	2422	1535	895	979	1800	1312	1276	1490
58.6333	2289	1666	1316	1635	1530	1435	1452	1703	2569	1351	1480	432	1430	1842	1200	829	1508	1638	1577	2090	2154	2462	1737	1762	1446	2039	2062	1731	1653	1109	1819	1241	2726	2092	1936	2280	1426	2307	1511	2544	1340	1885	846	1220	817	1921	1254	1638	1372
60.6333	2633	2133	971	2068	1176	858	1455	1067	2541	1693	1557	460	2531	2212	1357	1443	2395	1275	1792	2135	2670	1937	1899	1489	1582	1864	1677	2001	1655	1125	1258	1280	2069	2401	2043	2674	1414	1689	1453	1803	1226	1734	1374	563	1591	1275	1703	1855	1427
62.6333	2088	1970	1297	996	1752	674	1371	1164	2391	1629	1284	350	764	1843	1543	1078	1274	2012	1762	1768	1733	2439	1736	2302	1802	1985	1935	1649	1439	1048	2021	1232	2176	2363	2243	1902	1686	1218	1683	2166	1821	1760	1305	845	897	1809	1712	1471	879
64.6333	1824	1562	1162	1726	1466	935	1168	1048	2082	1354	1816	421	1132	2070	1558	1338	2357	2251	1992	1593	2370	1894	1777	1905	1303	1621	1615	2019	1270	889	1740	1351	1992	2067	2228	1428	1852	1453	2215	2124	971	1584	1409	527	1308	1771	1125	1493	829
66.6333	2050	1206	1298	1853	1451	1748	1375	1335	2110	1621	1450	538	780	1839	1217	1491	2319	1223	1746	1895	2312	2312	1550	1445	1727	1405	1731	2223	1457	1260	2080	1366	2311	1956	1414	1991	1585	2106	1985	2696	2080	1657	1080	722	934	1842	1216	1355	1015
68.6333	2722	1995	1453	1972	1857	2193	1180	1419	2021	1518	1303	363	895	1828	1105	934	1316	2266	1760	1967	1524	1889	1942	1191	1553	1444	1587	1814	1105	892	1584	1370	2331	2067	1731	1539	2093	1216	1150	2099	1228	1662	1055	1665	860	1549	1067	1183	653
70.6333	2192	1941	1283	1363	1293	887	1134	947	2066	1401	1676	422	2540	1877	1257	783	2550	1854	1623	1673	2727	1985	2308	1566	1483	1792	1618	2151	1422	779	2008	1343	1925	2193	1403	2482	1990	1948	1385	2063	1343	1633	1228	530	907	1565	1502	1515	1503
72.6333	1692	1679	1281	1683	1805	683	1195	1355	1921	1318	1356	505	2331	1788	1213	1339	1613	1864	1761	1772	1552	1852	1944	1256	1655	1667	1792	1942	1448	812	2023	1404	2364	2051	1546	1937	1544	1815	2446	1799	1523	2005	1073	636	1508	1559	1528	1685	677
74.6333	2358	1632	1498	1664	1260	1645	1091	1018	1708	1350	1073	550	2394	1657	1030	1394	1900	1480	2067	1414	2503	1856	1535	1285	1523	1625	1852	1894	1104	1008	1926	1060	2158	1634	1668	1945	1921	1293	2351	1799	1355	1761	1538	651	1069	1555	1066	1449	1159
76.6333	1875	1753	1550	1375	1593	961	1062	1045	1948	1180	1368	578	756	1359	1014	1103	2208	2294	1425	1632	2179	1838	2622	2201	1609	1585	1771	2138	1439	1118	2125	1264	1876	1917	1679	1739	1509	2053	1712	1981	1367	1545	1343	563	830	1655	2347	1183	827
78.6333	1699	1317	1334	1310	1671	1320	1129	684	1578	1085	1347	534	824	1526	1196	1405	1361	1738	1628	1693	1953	1763	1828	1779	1440	1474	1798	1768	1098	1249	2144	1301	2145	1995	1375	1968	1861	1799	1370	1977	1889	2054	1478	564	994	2073	1666	506	1421
80.6333	1222	2007	1644	1403	1188	1092	1053	931	1795	1527	1209	510	1780	1652	1255	901	1691	969	2066	1496	2393	1691	2373	1691	1333	1497	1885	1898	1301	1328	1898	1065	1712	1457	1682	1728	1374	1294	1099	2138	1764	2515	924	606	784	723	1255	596	615
82.6333	2330	1689	1379	786	1316	1605	1045	717	1851	1504	1064	569	714	1583	827	1057	1768	1962	1743	1793	1270	1757	2116	1546	1378	1165	1596	1947	1254	1233	1100	1157	1789	1664	1354	1755	1747	933	1639	2049	1364	1465	1572	1252	1190	1300	1259	1107	1187
84.6333	1335	1544	1202	1113	1233	620	945	896	1794	1381	1063	758	1203	1509	1032	874	1342	1972	1818	1779	1865	1527	1546	1685	1484	1398	1862	1736	1288	962	1761	934	1811	1544	1518	1460	1324	1353	1851	1995	1055	2026	1428	778	1176	1331	1088	1232	693
86.6333	1202	1487	1215	1463	967	1318	857	1043	1717	1533	1264	602	1297	1562	954	1046	1764	999	1767	1361	2377	1673	1866	1425	1866	958	1715	1997	1232	710	1851	1217	2083	1521	1168	1720	1563	1103	1695	2082	1692	1371	1204	558	1958	699	1162	950	1295
88.6333	1103	1491	1293	1392	1458	1395	869	962	1438	1313	916	850	1145	1219	1002	987	1446	1300	1553	1249	1978	1588	1992	1914	1562	1275	1733	1843	1207	1212	1901	1282	1620	1734	1484	1743	1397	1426	1605	1747	1446	1537	1011	1142	675	667	1044	1151	1336
90.6333	1786	1172	1458	1246	1347	1306	990	821	1657	1349	1225	342	1316	1265	898	1110	1638	1579	1741	1512	1956	1539	1990	1332	1747	1477	1307	1795	1022	1228	1555	1199	1618	1619	1147	1422	1253	1484	1609	1701	1595	2070	1223	516	1150	1222	1112	1080	992
92.6333	1997	1524	1488	1161	1456	830	838	797	1528	1221	1162	773	1355	1506	742	768	1774	1498	1522	1334	2431	1572	1896	1279	1639	1599	1667	1767	1003	978	1787	1349	1505	1718	1111	1735	1907	1048	1408	1955	1103	1652	1331	574	921	1342	1078	873	519
94.6333	1474	1633	1317	1123	1323	884	756	517	1222	1178	1107	499	1155	1244	772	687	1374	1597	1361	1766	2180	1445	2382	1305	1500	1241	1616	1402	1174	1192	1779	1128	1331	1589	1063	1355	1731	1168	1807	1320	1446	1479	1471	683	1081	1162	1106	615	858
96.6333	1385	1259	1177	874	1102	613	715	755	1677	1134	1166	342	918	1289	556	870	998	903	1601	1453	1185	1330	1860	1494	1503	1323	1795	1873	1003	1058	1696	1162	1771	1623	1281	1589	1590	1631	1519	1802	1371	1340	1096	1129	1772	1007	1068	947	1266
98.6333	1249	948	1339	948	1459	1527	913	623	1576	1382	1190	497	2021	1244	991	861	1353	1613	1550	1243	2348	1440	1781	1962	1563	1262	1354	1791	966	944	1817	1038	1576	1285	1338	1667	1844	1362	1344	1521	1440	2177	955	490	923	1237	1073	1004	742
100.633	1229	1493	1324	1219	1077	1051	939	623	1025	1335	858	688	1008	1089	611	820	1392	1541	1704	1199	1502	1382	1668	1551	1312	1238	1707	1652	796	913	1321	1008	1530	1393	1154	1515	1520	1370	1782	1377	1303	1791	1389	544	1854	1312	1151	884	1155
102.633	1156	1334	1253	1182	1218	1272	798	646	1490	1288	1128	873	918	1281	857	492	956	1021	1370	1245	1253	1212	2163	2023	1264	1280	1734	1400	830	1128	1565	1003	1502	1615	957	1321	1462	1111	1581	1956	1771	1126	972	852	1798	1010	1661	855	877
104.633	1691	1164	1352	967	1222	968	842	709	1449	1226	704	372	623	1011	739	903	838	1341	1507	1744	1658	1205	2227	1383	1591	1245	1321	1735	1103	776	1451	1083	1624	1440	935	1502	1749	906	903	1727	1290	1422	1060	832	1068	1085	1126	869	1037
106.633	1530	1105	1482	1383	1391	825	928	750	1408	1099	1150	784	2026	1151	745	489	1037	1012	1630	1262	2032	1258	2043	1186	1503	1046	1497	1726	856	1039	1616	1111	1417	1252	930	1018	1763	1197	1537	1531	1663	1715	1444	754	1647	1045	2057	692	604
108.633	1345	1218	1249	809	1417	834	742	530	1412	1250	818	622	640	1165	707	679	755	862	1375	1347	1749	1318	2020	1834	1555	1082	1429	1588	994	926	1691	1018	1493	1727	1044	1134	1572	1216	1390	2030	1425	2002	823	481	1858	1102	955	822	1036
110.633	1131	1322	1403	1375	1254	932	755	659	1163	1172	838	744	769	1175	696	714	1366	1025	1554	1650	1278	1185	1514	1340	1307	1285	1608	1554	917	890	1214	1144	1320	1363	889	1165	1552	1089	1332	1254	1130	1577	1054	512	857	974	1899	926	736
112.633	1284	1210	1307	1004	1193	991	673	562	1373	1344	977	748	1760	1144	779	411	1175	1014	1370	1369	1331	1087	1766	1196	1433	1048	1476	1565	911	979	954	995	1251	1208	952	1359	1692	988	1383	1591	1044	1427	842	1136	886	1019	1232	841	946
114.633	1787	1693	1292	1270	1282	819	851	535	1409	1110	768	444	807	1157	554	717	1051	985	1512	1485	2020	1148	2506	1383	1229	1146	1573	1505	950	977	1495	1012	1499	1410	954	1259	1481	1249	1283	1371	1642	1977	969	510	917	967	995	814	1046
116.633	1711	1109	1228	1198	1177	524	762	679	1301	1257	1074	733	1457	1184	586	804	1212	1319	1440	1434	1418	1239	1905	1082	1405	963	1476	1409	992	998	1551	942	1208	1232	855	1495	1585	1294	1656	1543	1134	1492	1155	310	945	1057	1033	894	993
118.633	1816	1131	1320	1147	1208	1174	667	719	1435	1409	1030	819	1585	1154	562	630	965	1311	1218	1334	1995	995	1700	1440	1195	1139	1459	1476	830	997	1162	895	1326	1364	839	1493	1415	1146	1674	1743	1331	1674	1285	773	1119	1001	965	688	973
120.633	1289	1375	1042	1284	1210	1401	643	657	1393	1015	804	965	602	1080	476	754	1384	1216	1389	1216	1960	1267	1856	1833	1315	1185	1276	1281	856	795	1426	716	1408	1105	834	1216	1626	852	1557	1377	1270	1320	877	640	1062	438	969	781	935
122.633	1153	1549	1362	1088	1097	885	673	604	1061	984	622	984	1579	1084	719	846	1271	1154	1518	1281	1536	1061	1939	1095	1102	973	1425	1325	867	982	1252	832	1610	1260	701	1113	1594	936	1356	1510	1128	1300	1099	559	1584	1076	1160	629	1056
124.633	1686	906	1125	641	1213	531	652	477	1292	943	771	898	1006	1172	681	699	888	1310	1482	1244	1304	1202	1446	1215	1383	1187	1417	1422	913	654	1341	916	1340	728	703	1129	1393	1402	1634	1305	1509	1440	891	686	1290	1024	853	773	627
126.633	1228	1353	1021	886	1147	612	740	614	1151	1186	946	705	1633	1175	581	836	688	1044	1249	1420	1185	1139	1858	1241	1261	1061	1396	1443	797	818	1671	914	1229	1006	632	1005	1190	1549	1382	1712	1524	1297	1106	496	1001	1117	1565	794	921
128.633	746	1155	1161	1127	878	1084	670	464	1199	1036	869	743	829	909	466	765	1054	1241	1243	1271	1285	1117	1181	1132	1385	1059	1327	1346	788	905	1390	763	1103	1018	669	1138	1627	1321	1324	1289	1507	1353	997	979	1409	875	1048	706	684
130.633	1690	1039	1238	729	840	1003	592	424	1167	1123	703	868	715	731	536	351	1237	1138	1264	1333	2017	1062	1571	1222	1169	830	1155	1254	924	886	1046	668	1397	1264	912	1292	1318	843	1484	1503	950	2047	1201	513	794	716	1034	706	857
132.633	1127	1196	1391	1005	1172	1009	780	488	1142	1176	816	796	833	1011	650	692	727	1061	1429	1284	1734	1044	1253	1138	1240	925	1462	1235	931	762	1180	814	1343	1237	703	1046	1746	1075	1055	1530	1330	1372	1123	539	1090	994	901	556	677
134.633	1029	854	1453	967	604	680	615	440	1083	1282	737	813	1356	885	567	447	875	1113	1228	1066	1515	1107	1754	1255	1267	828	1276	1267	888	943	927	814	1157	967	965	1155	1469	892	1501	1761	1077	1339	1107	538	975	1022	815	885	1107
136.633	1704	1280	1094	1136	1005	937	560	356	1149	952	634	846	734	995	529	742	1017	1074	1314	1184	1323	1006	1786	1307	1096	700	1324	1351	795	737	1318	730	1268	1069	768	932	1479	908	1284	1233	1034	1509	763	537	1162	865	1004	639	982
138.633	1495	1206	1054	850	939	1344	572	603	1152	826	694	347	744	958	546	537	993	1111	1329	1305	1740	1047	1755	1458	1119	978	1394	1051	716	809	1134	899	1418	869	757	1164	1629	938	1268	1688	989	2076	1073	696	862	717	854	585	984
140.633	1054	969	1198	775	1130	996	712	491	1039	880	655	1004	540	706	609	653	880	1046	1403	1305	1417	971	1782	1271	1269	894	1235	1190	861	811	961	725	1471	1177	732	1071	1234	1247	1568	1518	1169	1287	826	513	918	925	782	513	995
142.633	1505	1474	1298	1065	1277	1218	558	484	889	946	864	450	493	715	603	681	1107	786	1306	1068	1849	1027	1232	1227	1178	973	1399	1056	767	938	1109	754	1261	958	668	1051	1210	1365	1526	1427	1141	1320	1055	710	769	906	991	469	761
144.633	1212	1316	1185	689	1047	939	545	478	1160	1058	778	501	1239	874	444	550	991	644	1152	1218	1645	1006	1652	1138	1284	685	1332	1295	786	824	1176	771	1233	1084	711	842	1642	1090	1633	1612	957	1455	922	808	1406	904	813	607	607
146.633	980	1037	1083	528	827	689	584	524	1144	897	803	906	758	965	409	686	955	660	1133	1053	1961	984	1655	1061	1314	729	1243	1077	757	641	1238	842	1001	1159	588	1056	1488	863	1127	1774	897	1214	1137	445	835	836	1037	796	687
148.633	1093	1054	1021	852	892	707	533	609	1013	1094	743	974	525	911	452	369	995	746	1134	1092	1365	1027	1608	1335	1298	910	1334	1118	922	796	1045	673	994	977	691	1060	1415	1309	1459	1558	1002	1173	1093	382	1446	994	804	742	504
150.633	1532	929	1285	1186	1112	1109	607	307	812	973	659	590	868	938	525	465	468	862	1371	1256	1677	1037	1584	1403	1181	861	1157	1220	698	874	1326	805	794	824	640	1066	1295	909	1155	1322	1132	1339	970	567	835	852	935	584	785
152.633	1164	1338	1297	650	1172	923	581	490	811	1087	699	785	978	919	560	524	884	793	1224	1144	1822	899	1442	1707	980	961	1153	1241	850	767	1125	762	792	800	830	1074	1444	881	1118	1500	1228	1503	1093	720	689	984	1097	790	591
154.633	1193	971	1162	596	762	512	504	416	778	1073	620	575	899	834	510	691	603	928	1308	1170	1707	1007	1503	1152	1008	901	1160	1216	743	852	1029	846	1045	1008	677	1113	1447	1169	1423	1182	1057	1737	1067	625	751	925	856	618	850
156.633	1581	1153	1220	518	950	871	491	447	834	1070	588	433	588	928	457	513	749	919	1316	1256	1623	908	1320	1101	1316	919	1140	979	742	732	865	681	1142	1009	629	1017	1008	1084	1240	1258	849	1287	1013	508	873	831	907	760	666
158.633	698	832	1089	786	675	968	536	472	848	922	599	834	519	654	495	418	899	628	1278	1283	1270	919	1431	1119	1184	905	1149	1096	730	831	1279	808	933	897	622	856	1142	848	1224	1653	987	1296	1028	503	1200	868	1349	634	768
160.633	845	1039	1108	714	952	726	573	423	1028	986	742	503	859	662	567	713	941	815	1247	1167	1562	983	1696	980	1123	784	1173	1158	718	835	1182	713	962	741	803	976	1370	993	1381	1167	1070	1341	844	696	886	766	927	648	910
162.633	981	850	1145	808	683	851	514	460	797	916	792	500	594	770	565	614	643	744	1345	1336	1893	1045	1483	1212	1185	814	1234	1062	716	683	1226	734	1016	1280	588	1027	1312	1057	1520	1187	746	1275	749	739	752	909	798	550	767
164.633	959	1190	1137	703	709	908	519	282	972	786	657	866	802	803	513	744	783	931	1273	1139	1749	940	1634	1464	1143	809	1210	1082	728	816	1043	862	824	1083	557	859	1504	1227	1208	1243	945	1683	870	527	984	889	860	631	609
166.633	1200	1215	1207	765	852	1058	530	318	894	953	654	578	561	780	480	543	580	816	1320	1017	1612	962	1613	1059	1203	778	1128	1121	681	707	1067	776	1059	939	782	908	1454	875	1455	1235	1341	1592	873	746	1164	943	1045	746	598
168.633	875	1172	1187	657	888	1067	536	362	897	909	455	627	938	702	440	600	611	1012	1287	1215	1403	846	1492	1045	1172	793	1138	1139	755	740	1067	732	928	807	531	938	1233	965	1270	1584	941	1888	1015	478	708	870	1035	686	753
170.633	1073	1340	955	720	1089	597	526	467	667	886	558	525	1099	557	505	667	979	548	1244	1239	1662	963	1355	1066	1153	808	1050	1095	759	893	1052	839	1101	970	677	1256	1185	1106	1311	1632	923	1294	1000	572	709	747	969	715	690
172.633	902	827	1140	795	1007	1185	517	439	596	893	528	875	535	762	327	612	834	896	1325	1329	1685	977	1457	980	1312	771	1069	981	726	715	1100	820	1084	853	583	881	1594	1017	1409	1231	1068	1518	929	386	931	779	803	622	608
174.633	1242	984	1015	893	1000	949	514	471	1029	930	602	767	1227	691	501	540	402	557	1251	1059	1541	901	1749	1253	1306	808	1144	1077	800	678	745	746	1049	913	715	995	1171	889	963	1306	1022	1184	683	538	919	855	826	553	662
176.633	1030	1023	1149	513	1043	671	584	445	961	784	595	872	630	749	471	657	517	517	1167	1252	1852	973	1548	1199	1162	892	1228	1144	694	797	823	755	1037	911	571	969	1250	985	1397	1243	924	1405	799	518	670	921	978	847	691
178.633	1043	1081	1192	984	893	914	528	329	935	882	731	819	526	710	374	522	826	652	1184	1200	1505	1035	1644	1231	1068	886	1056	1088	726	836	811	802	898	822	606	1043	1306	1024	1326	1457	1125	1307	945	699	744	882	742	524	665
180.633	1353	1030	1167	794	911	570	478	434	783	727	633	988	988	831	493	592	752	558	1263	1166	1438	864	1594	986	1044	861	1206	1088	780	793	1156	812	1158	1026	564	859	1218	1080	1284	1240	974	1651	743	394	966	815	939	616	753
182.633	1275	1249	1249	907	881	1005	554	446	837	865	645	609	456	603	327	511	551	816	1399	1117	1586	1025	1716	1033	1302	814	1317	1038	821	698	1121	936	977	882	578	872	1488	943	1367	1289	1233	1180	775	501	737	754	1087	514	805
184.633	1251	1060	1162	725	592	382	459	597	740	780	542	717	461	670	457	449	481	678	1114	1147	1716	991	1789	1070	1366	812	1213	986	785	861	1109	800	813	780	607	1131	1087	785	1368	1473	1218	1078	934	427	717	789	867	432	798
186.633	835	1126	1051	638	823	968	553	340	853	927	668	877	423	737	350	442	722	528	1309	1248	1259	1012	1553	1473	1082	908	1142	1066	805	684	1120	803	1094	1042	661	965	1287	857	1035	1264	808	1714	862	671	898	807	794	713	747
188.633	646	1088	805	652	848	796	506	358	629	1002	639	661	552	757	406	590	447	518	1089	1125	1632	1003	1450	1072	1253	903	1219	1021	796	805	1050	910	932	1074	747	1021	1715	1059	969	1210	1174	1364	875	523	1386	778	1158	752	556
190.633	1182	943	1149	776	928	669	396	381	617	782	585	785	575	632	319	539	531	601	1189	1162	1836	1083	1844	1115	1122	812	1133	1040	769	753	946	786	1057	828	715	858	1261	1088	1117	1450	991	1250	993	707	600	822	1016	597	786
192.633	1116	893	1143	421	677	1018	389	330	840	935	558	664	621	694	493	578	483	579	1327	1299	1606	1033	1493	1123	1274	802	1177	865	857	724	1174	901	1126	795	577	1063	1378	1090	1036	1224	1181	1264	725	492	943	814	749	649	545
194.633	797	952	989	827	613	1077	515	391	583	924	580	672	775	599	492	512	426	721	1280	1207	1770	1063	1690	1524	1339	861	1255	1099	805	757	815	891	1229	829	658	1100	1282	921	1389	1054	941	1248	868	507	914	724	1015	447	749
196.633	706	1067	1055	777	928	552	474	412	545	733	524	534	520	753	458	614	476	571	1281	1175	1854	1163	1533	1237	1433	810	1188	1145	807	858	990	877	857	765	556	1014	1055	803	1385	1433	1071	1092	727	342	661	803	776	544	587
198.633	1343	775	1126	674	926	694	507	304	812	778	614	966	463	578	413	442	431	774	1293	1173	1832	1266	1415	1100	1246	878	1163	1106	760	753	1097	1004	853	928	747	1015	1312	971	1130	1244	1075	1124	750	735	1053	734	1082	634	469
200.633	1323	1052	909	669	777	631	536	312	536	791	388	890	593	558	583	368	678	729	1324	1297	1466	1354	1487	1171	1508	896	1331	1100	744	831	1039	916	940	885	577	981	1569	827	1300	1053	829	1067	843	634	777	761	794	816	519
202.633	830	896	1162	631	689	521	454	267	810	897	479	1141	638	581	399	451	718	706	1273	1254	1739	1142	1468	1426	1343	850	1332	1091	832	844	1056	835	1189	818	571	986	1244	750	1228	1226	1202	1648	907	307	729	789	1114	547	773
204.633	1277	1266	1156	712	757	758	595	310	575	753	604	668	633	602	412	456	482	811	1338	1277	1535	1016	1554	1326	1498	864	1170	1124	884	905	1145	833	1144	987	694	999	1310	857	1373	1063	759	1293	776	655	844	896	737	621	581
206.633	1064	1126	1068	650	1027	560	453	369	789	1051	656	810	894	670	450	376	508	742	1383	1262	2036	1112	1634	1715	1398	836	1179	1107	959	889	1211	1025	905	747	914	1211	1116	978	1102	1339	1096	1526	695	727	898	838	1021	528	584
208.633	1092	1090	1177	682	698	861	520	328	686	808	491	1176	578	470	486	636	443	807	1434	1285	1668	1143	1897	1364	1364	859	1185	1201	820	805	1228	1044	964	885	786	1085	1218	746	1074	1404	1157	1671	814	338	999	798	840	655	746
210.633	1082	1270	1004	738	944	655	410	443	793	735	387	472	496	691	397	423	399	404	1135	1368	1608	1230	1683	1350	1341	894	1329	1179	876	753	1185	1160	1126	1034	716	1056	1296	832	1227	1188	916	1153	848	644	888	865	793	707	586
212.633	1148	1210	1026	419	846	762	504	388	800	744	431	787	770	500	343	452	601	462	1371	1222	1720	1109	1412	1515	1332	892	1385	1137	907	845	1226	976	1180	900	708	995	1305	820	1085	1271	827	1392	642	613	934	868	707	764	701
214.633	1016	1095	1191	755	1043	679	489	364	734	856	449	748	561	485	384	485	477	751	1335	1286	1518	1127	1599	1470	1215	944	1438	1159	979	1007	1080	956	950	862	703	1010	1311	980	1156	1199	1049	1166	950	713	769	787	917	519	571
216.633	940	1124	1261	684	876	785	463	317	776	632	535	1065	847	454	406	407	480	723	1427	1376	1768	1409	1622	1440	1390	970	1393	1123	962	949	1270	1056	1150	1323	986	1029	1354	814	1340	1354	859	1098	902	673	794	741	737	664	619
218.633	888	1065	1058	760	707	616	556	469	794	801	524	1009	568	592	214	490	450	654	1451	1421	1546	1380	1623	1447	1592	916	1338	1059	1027	972	1218	1189	932	1035	750	1183	1132	929	912	1216	795	1147	807	709	802	857	1150	417	551
220.633	1224	973	1204	569	937	705	552	290	560	634	516	671	873	610	374	557	487	447	1259	1441	1793	1353	1543	1511	1642	1006	1548	1252	1014	793	1190	912	1282	1022	748	1239	1262	951	1289	965	940	1126	944	351	871	845	1132	364	697
222.633	1081	1056	1061	678	671	749	593	293	804	801	454	828	556	604	416	475	759	490	1512	1609	1640	1492	1595	1637	1426	859	1436	1177	1011	925	1309	1111	1210	1212	710	1130	1244	951	1081	1040	1154	1051	761	448	911	730	825	534	701
224.633	1092	1169	1021	730	889	465	591	401	689	527	467	779	850	614	427	444	410	479	1424	1381	1912	1378	1775	1584	1570	1107	1540	1254	1118	1110	1208	1198	1358	1107	750	1041	1454	825	1321	1038	1012	1274	854	554	864	985	721	700	631
226.633	989	1240	1141	701	952	982	597	417	559	690	494	770	834	645	356	525	481	534	1595	1522	1730	1492	1760	1564	1382	1090	1559	1177	962	1017	1407	1064	1181	1120	865	991	1351	959	1038	944	1198	1037	935	692	849	756	790	498	711
228.633	1315	1218	1059	650	612	531	486	434	805	879	503	1008	604	625	301	639	507	701	1611	1567	1704	1638	1722	1744	1559	974	1551	1224	977	1024	1352	1400	1241	1164	806	1238	1276	877	1033	1251	758	1201	841	649	1282	803	674	520	729
230.633	992	1324	1031	787	785	856	601	339	677	742	515	594	606	474	442	546	591	645	1568	1484	2021	1466	1727	1938	1408	1103	1570	1195	1065	1044	1224	1255	1239	994	930	1179	1188	1119	1144	1410	970	1242	874	610	829	708	872	608	505
232.633	1396	1078	1256	834	977	880	554	422	798	680	565	833	927	675	409	383	712	739	1520	1711	1852	1791	1948	2054	1710	1099	1432	1182	1027	1085	1291	1219	1381	1128	880	1143	1052	893	1232	1200	768	1154	892	680	981	774	724	654	660
234.633	1226	1480	1229	705	723	692	601	347	758	914	488	772	932	653	380	462	349	608	1521	1675	1854	1719	1875	1710	1684	1143	1599	1348	1166	1078	1303	1284	1354	1174	917	1215	1350	1047	1118	1023	862	1275	724	577	911	703	722	633	679
236.633	1041	1202	1123	856	826	494	659	374	849	686	498	628	533	476	341	530	356	483	1656	1877	1792	1741	1937	1994	1693	952	1560	1218	1229	1169	1435	1443	1116	1179	938	1334	1018	942	1167	890	1090	1461	872	519	1045	811	723	502	608
238.633	1233	1378	1158	754	744	810	628	413	727	739	516	595	717	487	387	414	484	610	1548	1806	1864	1872	1995	1948	1661	1121	1485	1298	1321	1061	1364	1552	1055	1266	939	1281	1386	797	1123	1090	1094	1084	902	396	764	793	868	600	655
240.633	1119	1116	1191	631	781	579	688	405	597	735	457	837	416	551	319	373	466	552	1788	2013	1989	1890	1848	1957	1593	1047	1804	1356	1399	1155	1519	1065	1268	1245	930	1277	1521	983	1047	1294	1215	1280	832	479	734	792	914	529	582
242.633	1037	1182	1331	840	1012	968	585	449	791	575	479	754	564	552	419	350	565	669	1840	1879	1939	1981	1991	2035	1662	1253	1742	1348	1321	1234	1499	1525	1377	1411	1017	1476	1475	866	1129	1063	1082	1034	587	495	772	844	758	736	555
244.633	1313	1302	1166	912	982	726	640	401	814	747	593	857	506	551	230	484	373	601	1617	2061	2313	2090	1888	2178	1761	1233	1946	1362	1325	1050	1351	1684	1213	1325	1166	1280	1470	926	1030	1019	1301	1325	902	528	811	752	767	755	645
246.633	1199	1384	1002	750	868	862	639	506	842	854	528	651	561	614	437	656	208	673	1934	2083	2065	1820	1961	2121	1855	1277	1672	1335	1478	1285	1501	1354	1434	1130	981	1331	1189	1064	1384	1288	821	904	864	810	1168	834	828	701	525
248.633	1203	1346	1188	896	891	854	717	345	568	595	507	814	435	486	300	454	425	432	2110	2040	2402	2122	1794	2191	1726	1392	1867	1333	1502	1257	1575	1358	1577	1312	959	1357	1117	1043	1422	1183	1227	1084	832	494	813	737	719	625	691
250.633	1267	1159	1452	905	1045	661	743	410	794	910	470	941	382	421	338	436	699	609	1764	2190	1968	2346	2163	2286	1974	1291	2170	1429	1407	1333	1453	1419	1239	1212	895	1318	1359	868	1185	1413	937	1181	784	641	731	728	804	434	775
252.633	1190	1338	1188	848	819	753	698	483	623	619	588	753	571	559	421	306	325	571	2101	2211	2542	2235	1983	2166	2096	1331	2123	1492	1455	1250	1623	1269	1379	1204	925	1448	1300	1019	1308	1111	917	1201	784	386	966	744	709	491	648
254.633	1053	1293	1181	878	839	1010	736	493	711	824	643	726	548	494	455	597	474	462	2213	2573	2188	2289	2345	2297	2144	1278	1920	1478	1450	1337	1714	1401	1120	1374	869	1608	1275	961	1126	1289	962	1353	897	735	750	889	752	438	701
256.633	1144	1547	1265	856	794	1000	759	468	780	690	534	847	509	460	416	361	583	694	2209	2444	2513	2460	2210	2694	2015	1231	2168	1457	1645	1243	1712	1260	1389	1424	1323	1478	1390	1062	1035	965	1025	1598	697	535	1107	766	795	703	460
258.633	1333	1316	1070	801	890	733	848	425	816	762	445	707	868	623	419	494	442	653	2317	2637	2347	2425	2177	2613	1921	1359	2239	1397	1221	1354	1684	1594	1245	1211	1184	1615	1392	1131	1200	1135	794	1185	938	462	803	610	927	506	584
260.633	1531	1654	1316	878	995	575	761	497	717	748	522	656	432	467	311	671	417	418	2338	2552	2366	2367	2279	2793	1998	1508	2357	1496	1313	1343	1632	1459	1578	1520	1198	1629	1417	937	1224	1278	942	1116	651	522	873	632	740	756	583
262.633	1229	1653	1234	914	609	719	735	508	850	879	522	521	667	580	367	523	312	578	1937	2399	2446	2508	2347	2636	2128	1519	2267	1510	1652	1409	1989	1518	1483	1428	1238	1459	1254	846	1140	928	862	1348	612	603	776	725	744	544	570
264.633	1400	1600	1296	987	893	731	854	597	904	891	457	708	701	614	375	348	597	486	2456	2577	2340	2665	2385	2386	2297	1421	2362	1594	1652	1404	1715	1474	1705	1558	1156	1724	1428	846	892	1220	1184	1304	702	650	1132	751	695	418	465
266.633	1845	1487	1309	1080	859	576	986	520	784	591	486	676	789	473	440	378	443	618	2280	2462	2552	2564	2395	2955	2439	1495	2350	1585	1694	1688	1749	1316	1597	1664	1469	1494	1484	1032	1412	1315	1054	1357	661	565	823	749	739	553	506
268.633	1430	1685	1592	1194	911	751	839	584	680	594	558	971	613	606	395	341	590	538	2511	2881	2542	2847	2511	3057	2417	1855	2206	1700	1265	1482	1723	1584	1421	1387	1239	1465	1447	1140	1152	1085	1102	1420	948	689	675	655	730	553	598
270.633	1432	1997	1326	1036	926	895	871	534	693	601	685	859	761	695	425	431	401	602	2518	2658	2697	2640	2485	2871	2337	1620	2592	1696	1456	1524	1923	1796	1540	1385	1073	1329	1496	948	1458	1202	1259	1228	774	433	755	788	875	649	487
272.633	1579	1707	1315	1024	901	694	909	653	881	701	620	592	434	493	393	514	435	367	2785	2488	2635	2630	2465	3103	2364	1987	2201	1772	1621	1497	1874	1876	1409	1648	1019	1570	1341	900	1117	1386	1151	1155	818	335	853	739	727	540	526
274.633	1791	2114	1318	1180	855	839	819	557	932	841	504	845	585	649	445	337	722	421	2385	2934	2761	2792	2524	3154	2214	1671	2302	1653	2051	1596	1904	1513	1549	1650	1311	1678	1627	1171	1023	1148	1211	1063	978	354	758	695	733	458	540
276.633	1375	1932	1207	1194	1026	930	1056	540	1008	723	505	514	676	642	407	495	353	631	2456	3295	3095	2998	2622	3217	2209	1481	2501	1759	1565	1551	1908	1402	1591	1673	1125	1722	1496	1322	1274	1233	908	1170	664	421	715	689	896	462	576
278.633	1793	2080	1459	1348	1094	756	1020	624	909	756	686	642	618	613	461	516	446	366	2643	3121	3249	2861	2665	3144	2479	1525	2253	1895	1663	1507	1894	1650	1426	1780	1582	1681	1502	1181	1205	1011	1091	1320	839	478	1017	848	806	767	676
280.633	1846	2189	1424	1222	1111	841	1000	667	1007	665	656	872	747	445	209	613	395	652	3084	3480	3103	3040	2463	3065	2385	2156	2613	2036	1985	1779	2014	1547	1697	1885	1630	1928	1591	1488	1335	1243	1242	1159	849	589	1154	788	723	432	702
282.633	2025	2302	1662	1314	962	858	1048	801	1030	759	732	837	535	594	453	375	475	612	2943	3535	2998	3159	2811	3184	2445	1989	2480	1948	2114	1883	2279	2601	1659	1554	1730	1744	1501	1164	1045	1038	1201	834	742	471	703	662	656	483	599
284.633	1583	2129	1482	1236	1194	792	1142	680	1052	526	584	867	507	519	400	408	627	471	3025	3470	3000	3223	3120	3193	2828	1631	3014	1952	1936	1914	2178	1703	1408	1709	1221	1609	1798	1362	1297	1284	1130	1498	754	478	831	672	737	500	612
286.633	2030	2424	1678	1390	1289	632	1112	710	1025	568	662	831	599	495	350	469	400	616	2541	3657	2950	3339	2862	3209	2679	2345	2156	1971	1681	1696	2027	2328	1577	1597	1719	1967	1743	1524	1357	1227	999	1099	988	716	704	624	889	417	629
288.633	2040	2403	1399	1445	1122	837	1117	797	942	717	732	739	709	490	437	370	373	561	3032	3819	3226	3155	2912	3573	2517	1767	2547	1756	1782	1833	2182	1831	1653	1998	1061	1687	1846	1386	1519	1274	1019	1025	903	557	816	597	978	711	528
290.633	1948	2447	1500	1483	1253	933	1112	882	1044	650	713	814	539	557	477	577	475	591	2816	3192	3359	3345	3215	3690	2885	2574	3004	1927	1823	1582	2073	1854	1572	2090	1627	1816	1719	1324	1407	1174	1060	1172	774	586	859	674	862	707	560
292.633	2419	2661	1646	1570	1039	714	1015	829	940	833	621	826	498	463	457	440	481	671	3358	3622	3266	3384	2933	3701	2791	2309	3008	1770	2423	1791	2167	1650	1869	1877	1702	1985	1887	1276	1487	1286	1241	1227	871	556	767	775	946	743	506
294.633	2107	2807	1695	1706	1217	918	1211	770	1031	1039	812	757	798	525	489	371	509	359	3204	3886	3531	3511	3042	3972	2473	2122	2644	1876	2313	1772	2241	1979	1673	1767	1912	1761	1785	1627	1469	1390	1001	1134	891	549	777	606	889	517	549
296.633	2068	2669	1863	1693	1177	1051	1179	856	1101	990	818	936	554	660	455	592	577	536	3680	4241	3438	3734	2920	3942	2787	2309	2739	2155	1839	1843	2041	2757	1908	1820	2095	2247	1851	1604	1515	1131	1155	1271	779	579	909	775	870	480	541
298.633	2696	2883	1730	1804	1375	1229	1152	962	1221	646	682	843	703	487	273	589	583	515	2807	4047	3493	3824	3516	3925	2565	2377	3214	1855	2146	2034	2096	1952	1806	1798	1977	1663	1791	1402	1348	1100	1244	1073	971	776	666	667	963	666	571
300.633	2488	2906	2070	1609	1380	1021	1231	925	1305	793	719	914	407	577	375	426	560	489	3469	3625	3842	3754	3308	3879	2895	2304	2797	2168	1588	1856	1976	2319	1745	1762	1991	1901	2090	1870	1249	1206	1088	1419	832	777	890	820	720	672	569
302.633	2615	2934	1957	1595	1462	1213	1278	892	1026	682	700	773	473	585	494	485	472	466	3185	4599	3830	3976	3383	3850	2926	1842	2803	2715	2055	2041	2335	2036	1913	1999	1912	2305	2014	1859	1225	1162	1195	1006	718	524	970	783	628	503	676
304.633	2888	3124	1930	1798	1351	1257	1439	1061	1221	528	726	803	570	680	501	430	393	599	3795	3624	4161	3866	3430	4183	3213	2206	2918	2166	2402	2010	2805	1621	1870	1945	1963	2399	2351	1873	1720	1441	1332	1222	869	524	829	725	720	662	516
306.633	2954	3267	1897	1903	1560	1010	1440	1175	1081	642	745	712	552	529	526	467	514	407	3514	4200	4054	4014	3222	4227	3352	2197	3277	2372	2745	2326	2458	1761	1926	2259	1377	2289	2230	2090	1607	1089	1251	1157	877	651	1118	717	756	667	724
308.633	3014	3639	2054	1874	1379	1199	1509	1065	1440	842	847	732	578	568	347	495	466	657	3625	4504	4055	4361	3558	4067	2749	2334	3491	2037	2676	1905	2864	2688	2000	2301	1905	2280	2254	1983	1717	1324	1174	1173	873	822	823	810	682	392	506
310.633	3537	3570	2578	2151	1670	1097	1489	1161	1331	743	791	796	735	580	487	417	482	474	3718	4352	4039	3905	3572	4246	2973	2375	3662	2826	2951	2412	2716	1641	1627	2236	1655	2466	2324	2122	1845	1384	1154	1378	678	711	826	675	750	586	662
312.633	3392	3874	2286	2323	1503	1085	1619	1009	1390	589	802	701	481	558	532	555	463	617	3903	4762	4373	4231	3756	4598	3440	2249	3128	2060	2734	2124	2205	1964	1780	2044	2394	2219	2298	1911	1598	1389	1226	1229	886	593	858	694	780	591	617
314.633	3728	3346	2313	2072	1700	1267	1653	1233	1232	626	771	708	729	590	530	531	494	458	3777	4468	4471	4369	3607	4580	2955	2850	4044	2355	2168	2163	2369	2245	1844	2483	1901	2573	2483	2171	1709	1316	1475	1226	839	664	852	682	748	644	466
316.633	3266	3588	2001	2242	1719	1133	1539	1196	1347	686	782	951	735	624	358	549	422	421	4060	4771	4699	4338	3381	3643	3197	2138	4035	2291	2307	2277	2832	2460	2038	2215	2267	2492	2646	2463	1894	1297	1268	1472	957	625	873	616	746	744	512
318.633	4058	3970	2560	2407	1829	1234	1640	1369	1639	747	798	976	747	709	496	517	531	440	3526	4466	4689	4348	3723	4854	3255	2045	3232	2685	2429	2624	2735	1921	1887	2096	1607	2163	2619	2698	1937	1346	1543	1594	761	667	1143	677	792	557	644
320.633	3860	3863	2427	2477	1738	1441	1898	1233	1365	819	891	794	559	692	479	533	478	614	4165	4121	4938	4239	3483	4811	3182	2722	2935	2445	1921	2880	2657	2092	2149	2123	2468	2461	2737	2499	2164	1468	1803	1494	867	683	935	885	1055	720	749
322.633	4132	4251	2829	2707	1875	1137	1803	1294	1534	609	839	629	763	666	412	544	522	450	4530	4480	4815	4268	3890	4367	3485	2247	3319	2477	3101	2083	2937	2623	1913	1941	1638	2447	2762	2212	2333	1515	1806	1439	1120	895	787	716	801	512	669
324.633	4024	4381	2966	2609	1793	1333	1818	1444	1640	766	926	928	494	632	575	394	442	445	4370	5355	4935	4585	4054	4449	3354	2842	3603	2333	2148	3539	2543	2514	1943	2339	2439	2415	2634	3000	2254	1554	1566	1185	795	546	932	760	771	648	625
326.633	3856	4296	2587	2752	1852	1243	1832	1476	1479	809	760	773	613	655	678	404	622	489	4531	5617	4561	4710	4323	5001	3402	2584	3975	2322	2861	2440	2781	2279	1901	2754	2085	2595	2753	2735	2391	1361	1488	1264	1195	728	876	721	744	800	504
328.633	4523	4528	2571	2862	1766	1426	1820	1480	1716	683	894	733	752	618	533	479	531	488	4588	5140	4974	4605	3844	3345	3790	2588	3848	2276	3122	3071	2769	2157	1965	3146	1682	2043	3005	2543	2193	1564	1663	1506	1042	818	864	718	805	811	672
330.633	4678	4692	2660	2913	2005	1162	1989	1435	1896	965	1009	1026	448	637	441	542	649	661	5119	5451	4578	4767	4136	3942	3572	2623	3706	2920	2580	2549	2844	2312	2232	2054	2500	2576	3091	3010	2381	1614	1626	1217	1128	964	926	724	837	616	565
332.633	4639	4945	3229	3055	2091	1266	2005	1742	1500	626	1066	758	640	686	556	611	567	512	4892	5428	5384	4963	4325	4372	3645	2487	4314	2429	2118	2177	2654	2406	1731	2075	2123	2741	3127	2986	2099	1569	1681	1481	1005	820	1060	722	837	442	523
334.633	4882	4680	2854	3191	2183	1581	2121	1712	1648	758	972	765	573	684	399	704	478	573	4320	5735	5340	4682	4035	4958	3280	2363	3301	2306	2131	2391	2783	2184	1935	2128	2400	2162	3193	3432	2843	1705	1668	1347	1080	812	1106	692	768	604	602
336.633	4920	5068	2997	3240	2225	1434	2029	1843	2056	995	1043	661	784	783	535	506	455	736	4833	4619	5123	4805	3832	5431	3965	2690	3638	2658	2003	2433	3195	2317	2106	2121	2494	2542	3658	3435	2071	1650	1721	1168	942	766	908	643	682	733	596
338.633	5001	5480	3327	3253	2151	1456	2301	1795	1951	768	1075	586	669	784	607	564	516	458	5365	6053	5704	4160	3593	4309	3986	2617	3687	3557	3599	3145	3216	2632	2221	2425	2432	2365	3453	3106	2421	1567	2057	1365	963	795	1140	710	700	559	624
340.633	5626	5296	3207	3094	2499	1400	2366	1472	1892	820	1204	964	605	740	510	667	708	573	5352	5777	5396	4756	4710	5186	3731	2753	3887	3027	2333	2481	2399	1882	1883	2740	2537	2481	3233	3744	2537	1685	1889	1504	1174	1049	922	782	773	656	540
342.633	5862	5047	3308	3202	2347	1426	2362	1767	1788	807	1006	824	703	832	519	578	543	604	4334	5639	5540	4591	4234	5124	3689	3073	4276	2772	1960	2570	2510	2034	2092	2689	2550	2183	3627	3775	2583	1808	1940	1708	1210	1063	801	684	733	690	695
344.633	6154	5222	3741	3555	2248	1476	2343	1845	2000	922	1093	1030	693	698	529	567	553	534	5220	6024	5789	5520	4445	5835	3890	2833	4897	2579	2662	2827	2639	2470	1954	2363	1421	2782	3433	3842	2767	1740	2094	1530	1121	912	1058	731	809	892	549
346.633	5622	5327	3502	3438	2464	1781	2238	2003	1943	885	1166	824	580	709	605	563	614	567	5771	4718	5662	5144	4275	5904	4005	2986	4958	2966	1961	2653	3346	2247	2616	3217	1624	2892	3792	3632	2818	1843	1988	1520	834	1075	935	722	748	885	711
348.633	6349	5982	3616	4037	2708	2126	2622	1880	2293	947	1016	791	582	729	493	590	734	662	5209	6713	5532	5103	4020	5625	4196	3825	4932	2388	2863	2762	3888	2357	2155	2478	2565	2487	4255	3401	3111	1861	1945	1722	1174	1250	1122	737	825	645	695
350.633	6079	5554	3623	3716	2530	1956	2436	1772	2166	760	1210	1075	598	802	628	463	532	498	5772	6581	6471	5251	4611	5495	3790	2713	4166	3293	2096	2115	2981	2437	2138	3049	2069	2821	3906	3646	3049	2150	2236	1724	1095	995	1128	752	796	852	528
352.633	6582	5967	3866	3694	2740	1722	2402	2173	2015	1018	1248	968	640	728	518	715	495	603	4587	5853	5847	5534	4845	6101	3997	2860	4296	3257	2686	2733	3408	1733	2059	3253	2787	1906	4417	4102	3180	1970	2144	1522	1309	1254	929	754	706	706	599
354.633	6985	6709	4299	4236	3016	2208	2740	2452	2277	881	1317	872	673	791	584	518	311	646	5261	5600	5953	5563	4873	5959	3776	3067	3870	3061	3675	2526	2356	2173	2323	2372	2174	1856	4209	4479	3314	2007	2221	1597	1055	1033	886	717	731	741	625
356.633	7037	6775	4160	4356	3054	1747	2906	2220	2049	917	1411	754	629	828	745	630	588	650	5401	6320	5852	5784	4896	5951	3986	4063	4043	2834	2410	2947	3363	2093	2317	2318	2929	2075	4150	4512	3060	1914	2620	1631	1282	1215	1214	766	807	639	525
358.633	7248	5627	3632	3972	3100	1960	3122	2447	2156	883	1314	1041	711	858	600	751	611	699	5423	6759	6291	5791	4758	5467	4187	3409	4872	2893	2964	3479	3439	2209	2009	2904	1973	3179	4989	4412	3360	2033	2283	2120	1262	980	1116	739	839	699	711
360.633	6793	6419	3909	4486	3044	1927	2869	2616	2304	909	1416	652	795	1038	787	707	698	620	4666	6245	6469	5480	5154	6117	4146	3315	4336	3133	2611	2909	3438	2221	2192	3663	1834	2873	4687	4546	3614	1928	2561	1755	1358	1014	1016	688	912	770	523
362.633	7313	6437	4536	4558	2909	2235	2638	2168	2589	877	1505	1015	788	770	569	601	600	584	4972	6857	6917	5772	4877	5518	4679	3225	5553	2663	2461	2846	3332	3206	1991	3330	2910	2433	4351	4550	3604	2346	2597	1972	1171	1260	1098	809	804	669	508
364.633	7539	6471	4737	4936	3087	1870	3039	2522	2590	940	1398	1046	776	747	684	536	862	609	4608	6867	6254	4583	4629	6507	4587	2764	4072	3150	3346	3079	2660	2875	2499	2628	3215	2392	4859	4788	3787	2182	2619	1963	1339	1147	1088	876	838	979	683
366.633	8059	6610	4193	4615	3182	2381	3096	2610	2373	917	1558	1145	723	885	731	597	645	570	6483	7074	6727	5690	5008	6408	4605	2683	5155	3031	2272	3607	3354	2245	3886	2265	2905	3522	4700	4785	3853	2297	2542	1920	1448	1063	1139	727	766	970	664
368.633	7616	7556	4850	4696	3495	2182	3623	2521	2652	1014	1619	899	658	923	722	648	653	643	6439	5390	6894	5993	4518	5637	4975	5138	4113	2980	2144	5089	2809	2953	2274	2470	2750	3397	5126	4809	4103	2335	2519	1816	1309	1053	1163	770	825	916	537
370.633	8033	6566	4422	4819	3563	2238	3022	2433	2692	977	1563	872	736	920	694	711	666	589	6639	6816	6327	5900	5385	6124	3653	5080	5112	3036	3116	2867	3564	3784	2205	2899	3041	2901	5054	5256	4110	2418	2614	2164	1357	1192	1110	853	902	881	762
372.633	7902	7491	4470	5079	3541	2661	3012	2829	2919	1041	1401	856	709	967	760	603	929	645	5598	7247	7026	4794	5678	6106	5063	4367	5209	2810	2984	2789	4059	3108	2438	2679	1576	2308	5450	5257	3809	2508	2813	2170	1422	1270	1203	819	723	1023	595
374.633	8128	7476	5269	5500	3904	2498	3546	2990	2563	1023	1664	1111	697	1000	715	642	851	718	7315	7696	6654	5950	4607	6920	3881	3412	5526	2669	2627	4068	2947	2596	4136	3669	2922	3107	5556	4909	4191	2502	3075	1889	1342	1291	1233	906	703	881	629
376.633	8904	8345	4674	5809	3805	2526	2942	2916	2903	1044	1688	912	799	1033	727	702	878	712	7082	7168	6299	5950	4561	6619	4831	4205	4451	3757	3665	3191	2697	2739	2348	3563	2748	1950	6021	4904	4207	2414	2923	2429	1483	1261	1174	881	947	1047	850
378.633	8974	6810	4622	5974	3570	2439	3221	3055	3106	1186	1656	1110	796	1064	768	737	714	749	6486	6573	6920	6063	5261	6271	3870	3482	4727	3838	2541	4208	3838	2819	3071	2936	3132	2244	5834	5651	4527	2609	3120	2152	1278	1228	1213	815	786	1016	687
380.633	9334	8690	4807	5302	3725	2549	3570	2664	3099	973	1631	1137	808	935	982	772	849	631	6299	6555	7741	5822	6126	6300	4844	4098	4884	3662	2493	3079	3554	2375	2992	2700	1994	3464	6219	5660	4879	2924	3291	2547	1350	1609	1310	795	805	864	498
382.633	9547	8011	5010	5996	3959	2931	3397	3003	2985	978	1737	939	785	956	889	596	812	650	6399	8268	6881	6457	5679	5024	4092	3188	5063	3087	2200	3943	4182	2284	2740	3003	1502	3247	5253	5781	4471	2696	3025	2238	1527	1423	1289	856	792	1077	592
384.633	8780	7373	5349	5525	4223	2712	3771	3041	3079	1112	1791	876	808	1038	870	729	913	779	7098	7502	7372	6155	4839	5508	3776	5322	5828	4711	3099	3205	3062	2269	2986	3325	1956	3422	5932	5805	4706	2999	3384	2198	1520	1500	1372	862	848	1090	614
386.633	9748	6990	5344	5947	4038	3161	3793	3046	2993	913	1848	1113	761	983	805	601	928	802	6282	6931	6847	6285	5559	6955	4933	4232	4894	3763	2921	2539	2912	3037	2771	3180	3036	3621	6247	6235	4733	3111	3169	2487	1454	1466	1399	969	870	1134	489
388.633	10192	8866	6173	5720	4336	3036	3911	2933	3280	952	1594	989	831	1077	862	684	766	645	7293	8049	8061	6179	5891	5486	4951	4966	5820	3144	4384	4319	3021	2430	2301	3990	3282	3138	6331	5899	4781	3151	3292	2568	1611	1645	1418	977	819	1108	571
390.633	10313	9151	5504	6399	4065	3124	3434	3751	3199	1069	1993	879	872	1039	953	655	1016	820	7669	7966	7302	5913	5649	7292	5419	4196	4683	3112	2901	3302	2972	2703	4025	3021	2118	3526	5724	6254	5299	2751	3535	2533	1622	1567	1505	856	881	1114	775
392.633	10585	8686	6211	6211	4745	3260	4084	3651	2938	1080	1660	1183	946	1147	907	769	938	729	7594	7680	7994	6396	4837	6533	5085	3861	5333	3148	4451	4859	3375	3250	2303	2967	2922	2064	6312	6403	5057	2941	3636	2426	1709	1629	1428	933	822	1030	522
394.633	10570	8226	4955	5847	4740	3277	4025	3656	3131	1102	1637	1237	932	1187	851	889	930	739	6172	8398	7319	6704	5854	5500	4763	5503	3733	3200	4093	3264	3797	3635	2263	2603	3045	3365	6399	6831	5048	2810	3649	2553	1543	1732	1631	923	818	972	705
396.633	10246	8062	5900	6666	4834	3459	3728	3805	3052	1264	2083	1031	912	1239	873	701	904	852	7871	7222	7451	6538	5812	5193	4718	3762	5135	3167	3458	3929	3163	3877	2421	3965	3209	2575	6749	6490	5833	3457	3640	2691	1708	1742	1550	1090	1000	903	690
398.633	10133	8148	6153	7028	4770	3486	3797	3784	3418	1236	1752	995	978	1164	1093	872	838	651	7672	6257	8626	6539	6317	6948	4315	4382	5896	2815	2953	3285	4435	3291	2296	2834	2931	3312	6864	6762	5402	3376	3635	2750	1773	1740	1517	1013	835	1313	734
400.633	10798	8033	5520	6370	5086	3554	4202	3728	3220	1151	1903	934	1087	1311	989	799	945	800	7510	7331	8172	5862	5649	7022	5229	4695	5448	4801	2931	3567	4409	2683	2591	2639	3666	3661	6831	6616	5351	3243	3905	2693	1657	1665	1520	1150	898	1036	646
402.633	11474	9872	5854	7407	5438	3058	4594	3552	3506	1197	2202	1168	974	1219	942	808	1102	826	7931	6291	7372	4527	6008	6949	5073	3870	5498	4301	3041	4940	3666	3189	2384	2587	3129	2016	7677	6821	5954	3024	3780	2694	1997	1892	1697	1039	947	1210	767
404.633	11236	7886	5745	7648	5426	3478	4410	3990	3190	1197	1894	1009	1045	1291	908	909	887	762	7020	7673	8948	6822	6333	7239	4585	3921	6461	3537	4605	3779	3835	2597	2377	2962	2306	2387	6893	6790	4916	3323	3532	2898	1771	1926	1699	1123	914	1335	560
406.633	11180	7917	6655	6687	5474	3815	4081	4079	3464	1367	2164	1073	907	1151	965	807	997	739	7460	7105	8655	6895	5428	7286	5124	3602	5063	3384	3214	6134	2948	3856	2822	4067	1866	3106	7081	5500	5894	3463	4078	2925	2062	2063	1653	1094	974	1089	603
408.633	11367	9968	6758	7159	4952	3639	5050	4149	3647	1408	2013	1092	949	1249	1075	624	999	694	8223	8684	8484	6153	6241	7359	5656	3819	4227	3750	4198	3324	3087	3098	2596	2789	3652	3566	7847	7704	5962	2895	4026	3157	1932	1943	1631	984	966	1202	532
410.633	11833	9478	7018	7922	4828	4078	4569	4283	3461	1322	2338	983	1026	1301	1112	804	1141	790	8467	9173	7186	6470	5534	5195	5894	3817	4726	4405	3376	3398	3232	3363	4540	3314	3668	3261	7140	7415	6316	3381	4010	2931	1931	1946	1647	1089	888	1075	575
412.633	11852	8888	6531	7813	5182	3554	4559	3837	3483	1154	2535	1297	1018	1330	1148	960	937	802	7188	8855	7915	6950	5701	7645	5826	5647	5211	3225	3259	3522	3346	2677	2426	2832	3537	3373	7755	7090	6338	3681	4148	3097	1897	1940	1710	1199	1031	1304	586
414.633	12554	9782	6949	7793	5619	3847	4657	4203	4112	1357	2246	1013	1074	1618	992	826	1063	843	8074	8571	9244	7176	5841	7774	5694	3684	5644	3708	2623	3348	3690	2788	4015	3111	3675	2995	6756	5477	6405	3285	4373	3068	2096	2110	1920	1223	954	1281	743
416.633	12882	10115	7347	7827	5837	3740	4225	4709	4255	1419	2361	1156	1134	1453	1263	876	1215	878	8553	7860	7800	6676	5052	6439	5946	6228	5118	4612	4825	3442	3664	3065	2384	3832	3367	2658	7416	5112	6652	3615	4541	3182	2100	2130	1809	1243	941	1074	738
418.633	11961	9815	6821	8896	5966	4238	4572	3645	4085	1454	2492	1092	1036	1507	1084	853	1094	986	7620	8567	9115	6998	5594	7890	5998	5104	5548	4349	4249	3603	5512	2905	2751	2909	1771	3135	7701	7380	6689	3715	4078	3071	2135	1978	1824	1088	1032	1107	549
420.633	12907	9710	8044	8614	5958	4090	4633	4059	3576	1356	2614	1319	1086	1390	941	878	1218	806	8848	8212	8284	7278	6268	7766	5631	3493	4422	3572	2894	4747	4784	2580	3150	4608	2352	2124	8823	6254	6748	3941	4546	3219	2154	2091	1764	1190	1183	1359	756
422.633	12816	9621	6653	8714	5478	3820	4653	4505	4427	1324	2635	1028	1092	1448	1180	828	1188	999	9037	7712	9740	6968	6313	8170	5254	4835	5939	3108	2343	3841	4897	2605	3956	2752	3865	3679	8633	6149	6117	3791	4734	3516	2345	2013	1761	1390	900	1580	678
424.633	13328	11776	7551	8855	5598	4486	5058	4795	3859	1512	2744	1186	1112	1437	1038	1030	1135	878	8203	8183	8837	6195	6409	8126	5244	3926	5228	3497	4493	4101	4253	2179	2400	3047	2504	3120	8900	6505	7062	3898	4728	3842	2204	2383	1885	1150	1062	1496	691
426.633	13033	11696	7178	9494	6051	4288	5745	5188	4323	1420	2608	1226	1205	1545	1219	973	1035	1048	9002	9439	9144	7257	6606	5985	5437	3344	6345	3971	2632	3603	3050	3228	2788	2887	2504	3024	8996	7074	7035	3623	4944	3446	2256	2271	1797	1247	1087	1323	711
428.633	13754	11078	7652	8403	5703	4600	5926	5230	4142	1523	2708	1434	1202	1527	1263	918	1245	975	6482	8463	7998	6471	6292	6938	6518	4970	6420	3331	4283	4584	3736	2880	3180	2931	2482	1949	8763	7382	7309	3882	4917	3699	2436	2418	2140	1185	1059	1479	837
430.633	13179	11966	8069	9467	6606	4854	5106	4244	4005	1427	2692	1193	1256	1579	1041	1036	1228	990	6455	9368	8404	7356	6438	7290	5947	4111	6436	3553	2726	3742	3771	2696	3197	3509	2087	3480	9579	7921	7579	3940	4843	3556	2263	2601	2024	1252	1057	1473	825
432.633	14592	10612	7711	8560	6008	4451	5520	3686	4287	1612	2864	1173	1263	1582	1394	1080	1276	998	8886	9780	9792	7155	6462	7776	5961	3455	4583	3941	2847	5568	3441	2106	2686	3347	2215	3298	9675	7898	7294	4498	4849	3785	2394	2230	2025	1193	1062	1430	615
434.633	14624	10445	6954	9663	6749	4998	5237	5178	4539	1494	2881	1189	1256	1471	1483	1057	1363	890	9039	6939	9460	7401	7152	7980	6156	3984	6557	3710	2824	3671	4231	2848	2423	4096	3746	2345	9652	8582	6826	3853	5092	3732	2492	2615	1805	1453	1106	1387	779
436.633	14169	12893	7594	10358	6932	5306	5258	4999	3818	1773	2724	1265	1288	1566	1329	1064	1365	1022	9650	8690	8728	7596	6423	8257	5090	5047	5661	3487	5388	3814	4324	3266	2356	3034	3890	2135	9001	8898	7415	4731	5212	3637	2296	2359	2051	1281	1112	1452	587
438.633	14975	9224	8418	8537	6235	5034	5422	5538	4238	1424	2909	1431	1279	1620	1004	1169	1298	1106	8733	9167	8692	7240	6566	8553	4617	3891	7349	4186	3139	6173	3624	2435	2755	2923	2181	3882	9818	8819	7495	4094	5064	3802	2511	2471	2053	1433	1191	1532	712
440.633	13644	12682	7269	9226	6629	4604	5810	5393	4023	1545	3129	1248	1279	1782	1301	1002	1325	1142	8362	8287	8834	7045	6859	7734	4582	5379	6808	4222	3083	3741	3429	3306	2556	3508	4165	4045	10184	7174	7555	4061	5233	4084	2642	2520	2212	1253	1097	1269	773
442.633	15184	10555	7569	10769	6854	4713	5632	5437	4154	1628	2863	1384	1363	1685	1380	1303	1280	1164	7793	9266	8955	7364	5770	6002	6561	6411	5833	3512	2935	4735	3432	2702	2968	3111	3620	3714	8449	9309	8008	4582	5438	3906	2686	2647	2144	1439	1155	1524	816
444.633	15542	11224	8847	10136	7181	4559	5668	5782	4882	1476	2849	1388	1497	1701	1401	1114	1606	1048	7204	8343	8687	7630	6050	8011	6328	3564	5048	3839	4597	5139	2984	2989	2677	3978	3383	3834	10397	7038	7945	4053	5551	3916	2519	2633	2215	1362	1239	1476	839
446.633	15547	13129	6974	9327	6563	5370	5772	4771	4608	1940	2772	1302	1387	1849	1359	1271	1186	1021	8738	8367	9114	7631	6479	8124	6521	3409	4547	3104	3006	3607	3991	3384	4153	3834	3766	2308	8491	9600	7888	3669	5693	3933	2649	2602	2285	1388	1180	1509	807
448.633	16417	12742	8648	9720	7710	5092	5312	5779	5037	1802	2987	1396	1318	1890	1353	1249	1330	1112	8927	10045	9667	7743	6575	6731	5135	4256	6030	6069	5431	3831	4124	2553	2956	3086	3795	2948	10513	8940	7716	4285	5572	4288	2549	2699	2432	1519	1178	1722	895
450.633	15693	13159	8840	9620	7831	5757	5798	5184	4019	1783	3153	1355	1410	1913	1391	1240	1382	1236	9489	9957	9843	7805	7328	8053	5537	5211	6075	4350	2662	5488	3559	3360	3806	3710	2701	2498	10431	8551	7457	4875	5604	4184	2944	2784	2176	1363	1234	1694	868
452.633	16406	11896	8240	10340	7886	5644	5717	5206	5150	1803	3076	1377	1505	1878	1347	1241	1572	1333	9584	8020	9682	8231	7019	9016	4879	4929	7791	3810	4334	3874	4260	2468	2506	3953	2122	2099	10747	8644	8320	4583	5950	4317	2971	2495	2430	1502	1229	1901	835
454.633	16095	11472	7592	11544	7268	5808	6512	4805	4855	1884	3368	1320	1547	1954	1512	1054	1468	1255	7243	9110	10969	7332	7090	8699	4832	3610	4763	4975	2933	4190	3627	2728	2573	3983	3761	4265	10651	8599	8505	4367	5908	4154	2908	2866	2260	1745	1259	1568	695
456.633	15303	12631	8716	9875	8404	5641	6003	5232	5167	1729	2662	1415	1492	1922	1402	1274	1316	1344	9884	7531	10182	7608	7504	8084	5792	4145	5408	3663	4056	3927	3762	4240	2580	3387	3604	2120	11083	8988	8756	4154	5535	4490	2858	2908	2442	1553	1401	1722	876
458.633	15114	14146	8353	10682	7948	5776	5859	5919	5710	1843	2982	1381	1525	1970	1567	1314	1738	1265	9142	9935	8912	7455	6386	8111	6291	4819	7230	3963	2933	5882	4912	3398	2849	3297	1891	3687	10555	6784	7670	4685	5493	4045	2781	3102	2549	1621	1346	1608	770
460.633	17380	14271	8236	10384	7520	5967	7227	5941	5624	2067	3324	1592	1606	2035	1444	1364	1639	1061	9457	9979	10908	7497	6217	8343	6780	7311	7176	5143	5014	5021	4010	4361	4994	3395	2734	3128	11588	9364	8487	4751	6086	4591	3027	2831	2357	1588	1327	1661	887
462.633	16658	13325	8884	12124	8291	6129	6045	5638	4340	1779	3613	1500	1529	2102	1486	1121	1393	1246	9986	10050	9041	5258	7126	7932	4935	7106	5544	3966	3625	5883	3591	2920	2680	2776	2692	3390	11650	9248	9061	4305	6100	4136	2631	2985	2579	1680	1245	1955	935
464.633	16307	14238	9726	10224	7766	6192	7178	5633	4623	1579	3231	1564	1699	2038	1561	1174	1710	1313	10048	8769	8965	7780	7645	7372	5253	4625	7591	3324	2951	4118	4937	4243	3230	2762	3942	3913	11310	10328	8717	5479	6554	4428	3028	2905	2742	1537	1351	1860	990
466.633	17655	11553	10027	10390	8433	6274	6867	6441	5729	2284	3578	1649	1729	1946	1713	1298	1335	1326	8127	9401	10023	8139	7125	8012	5561	4029	7491	4023	3393	3378	4801	3606	2898	5390	3049	3042	11792	9700	9289	4725	6614	4806	3137	2791	2541	1699	1222	1943	987
468.633	17272	14037	9567	12472	7891	6655	6571	6565	4470	1964	3164	1665	1671	2080	1460	1482	1798	1171	9875	8660	11363	8042	6390	7838	5540	3876	5641	4404	4239	4086	4302	3501	2829	3968	3814	4180	12004	8447	9478	4804	6448	4600	3305	3175	2603	1764	1396	1978	762
470.633	18059	13306	9855	11640	8378	6359	6832	6237	6352	2136	3624	1664	1754	2051	1175	1153	1497	1299	10136	10379	9113	5122	6309	8098	6536	4057	6978	3536	5869	3863	4531	3579	2910	3407	2353	4028	9746	10729	9844	5069	6657	4547	3159	2800	2818	1705	1406	1950	905
472.633	17356	14419	9816	13002	8629	6709	6476	6612	5074	2226	3804	1709	1795	2108	1602	1397	1789	1334	6940	8773	11202	8136	7567	7321	5916	6670	5435	3832	2746	5439	3530	2411	4461	3658	3751	4521	11941	9751	9396	4910	6651	4892	3104	3366	2627	1573	1411	1771	867
474.633	17600	13529	10407	12094	8801	6155	6369	6842	5231	2200	3481	1667	1706	1980	1464	1433	1826	1523	10399	10870	10755	8151	7594	8219	6341	3980	6544	3482	3182	3882	4433	4411	3985	5006	3917	3002	11347	8439	9065	3438	6712	4740	3377	3290	2863	1590	1357	1895	881
476.633	18689	14043	9349	12759	9331	6727	6376	6482	5606	2009	3963	1583	1786	2213	1772	1535	1683	1281	10343	10176	9417	8293	7741	8764	6794	5937	7515	4093	3146	5320	3639	3049	3487	3179	4309	4676	12039	11132	8822	5232	6660	4932	3245	3309	2637	1658	1457	2152	837
478.633	16569	14480	10362	12217	9279	6478	7726	6516	5739	1979	4117	1721	1651	2243	1930	1523	1381	1455	7519	10924	10358	8148	7715	7134	6446	3732	7728	3754	2741	4137	3443	5146	6968	5207	4041	2158	11403	9406	9934	4616	6840	5082	3364	3590	2946	1835	1492	1844	885
480.633	18251	15002	10607	11488	8973	6609	6441	6082	5555	2359	3290	1601	1876	2442	1696	1492	1627	1378	9894	10725	9624	8448	7138	7313	6425	6696	6683	6565	5208	5627	3443	3979	2891	5123	2271	4171	12577	9543	9680	5581	6521	4763	3395	3273	2862	1718	1507	2123	849
482.633	18438	13647	9641	12796	9498	6179	6598	6489	5390	2568	3919	1642	1816	2006	1903	1606	1981	1464	10417	10746	9332	8165	7499	8048	6890	4476	5612	6030	2873	5574	3702	2560	2888	4703	3308	3531	10438	10315	9676	5579	6881	5101	3499	3502	2912	1736	1415	1799	952
484.633	18000	13149	10479	11989	9482	7120	7654	5673	5245	2342	4181	1787	1856	2310	1801	1707	2010	1571	9494	10465	9054	8195	7559	8861	6853	4201	7576	3934	3225	5107	4781	2869	2910	4809	4412	4436	12081	8559	9560	5378	6964	5212	3599	3737	3002	1681	1585	1980	1038
486.633	18178	15264	10772	13987	9439	6031	7801	5738	6547	2689	3110	1679	1848	2061	1815	1741	1929	1424	10279	9365	10629	8029	7743	8336	6399	4343	6511	4723	3621	4045	5393	2362	3226	5806	3189	2665	12465	10111	10083	5219	6389	5376	3624	3476	3060	1989	1716	2163	849
488.633	17223	14025	9497	13634	9696	7350	8373	6308	6232	2450	4208	1705	2004	2230	1939	1506	2118	1547	9734	8746	10297	8058	7124	9428	6799	5568	6341	4002	5697	4236	5210	3970	2645	3240	4180	3724	12022	9601	9806	5679	6996	5252	3457	3536	3031	1917	1618	2101	999
490.633	19754	15273	10712	12965	9010	7251	7596	6766	5860	2169	3532	1764	1847	2165	1972	1744	2090	1411	7418	9252	10384	8356	8970	8643	6848	4978	6087	3992	4494	4261	5732	2980	3160	3355	4144	2341	12608	9372	9466	3830	6851	5338	3715	3352	3034	2037	1605	2211	1084
492.633	18636	15494	10006	13328	9472	7779	7320	7007	6146	2275	4342	1629	2086	2419	2123	1565	1832	1638	10794	10461	11864	8422	8314	7432	6908	4095	7444	4652	3572	3733	4060	3617	4075	5963	2105	2307	13083	7621	10148	5770	7049	5477	3721	3669	3076	2091	1660	2188	1060
494.633	19057	16062	11436	14262	9247	7527	8043	6126	6019	2341	4241	1840	1981	1983	1878	1734	2048	1738	10347	9672	9409	8569	8036	5622	6942	3699	5923	5334	2904	4151	5790	4231	2860	4595	4275	2366	10926	10183	10262	5544	7403	5307	3694	3482	3072	2078	1560	2329	933
496.633	20697	15972	10829	14416	9086	7010	7330	7399	5217	2523	4208	1940	2143	2373	2151	1742	1789	1774	10060	10668	11308	8187	8737	9539	6626	5065	7145	3873	2777	5500	4137	3313	2840	3789	1941	2959	13140	9800	10066	5209	6418	5419	3399	3846	3084	2041	1618	2322	1137
498.633	19660	12936	11002	14432	10352	7735	7864	5091	5647	2292	3442	1879	1814	2461	2074	1663	2402	1881	10047	10614	10908	7762	8069	9432	6619	5091	5947	3756	4386	4158	6219	4442	2944	2922	2338	4078	13433	10139	10615	5517	7143	5761	3784	3528	3175	1937	1621	1992	983
500.633	19252	12799	10658	13443	10188	8005	7755	7192	4969	2606	4515	1973	2062	2536	2084	1859	2211	1698	10675	9398	12224	7543	7884	6782	7667	4752	5351	4208	3939	4452	3832	2591	3505	4012	2573	3074	13042	8108	10237	5020	7597	5345	3305	3898	3273	2207	1584	2067	1000
502.633	18508	16089	10170	14131	10780	7915	7386	7287	6646	2303	4405	2022	2297	2621	2194	1778	1742	1893	9865	10759	11474	8325	6784	9336	6527	5310	6579	5505	3457	4356	3452	2541	4098	4130	3628	2815	13464	10561	8817	5921	6346	5700	3818	3771	3192	2106	1618	2395	968
504.633	19545	13032	10574	15310	9127	8193	7941	6587	6714	2781	3784	1999	2243	2534	1955	1726	2142	1904	9894	10936	9407	8499	8008	8849	6494	3957	6455	5097	2976	4581	4004	3729	4821	3575	4377	3964	13081	10612	11471	5782	7787	5698	3866	4118	3311	2306	1798	2149	1122
506.633	19538	13465	8933	11356	10861	6933	7893	6060	5949	2558	4457	1972	2319	2479	2233	1529	2194	1751	11183	11104	12569	8194	8167	9151	6693	4298	6076	5226	3815	4382	6191	3245	3411	4517	4303	4337	12429	11163	11156	5445	8008	5960	4143	3752	3380	1981	1724	2438	1078
508.633	20276	16049	9250	14791	9795	7341	7883	8142	4802	2771	4420	2033	2059	2264	1877	2024	2356	1890	10753	9327	12256	8591	7196	7581	5811	6911	8201	4568	3183	4112	3565	4100	2711	6238	2670	4381	13151	10957	11193	5755	7674	5239	3863	4204	3295	2241	1738	2139	1099
510.633	20950	16239	11486	15287	11049	7791	7643	8434	5783	2989	4979	2076	2381	2479	2167	1841	1914	1663	7690	10375	10924	8555	8202	9659	7040	4225	7426	5545	3239	4208	4745	4326	5821	3446	3975	3538	14236	10570	10938	5503	7955	6138	4106	4078	3451	2057	1803	2375	1149
512.633	20893	15415	11568	14786	9541	8492	8180	6873	5735	2602	4953	2081	2359	2565	2304	1935	2154	1389	9920	11145	9941	8893	8098	9329	6653	3982	6417	3864	6344	4203	4147	4544	3008	5126	4414	4257	14274	11121	10277	5840	7813	5801	4088	4104	3474	2352	1753	2338	958
514.633	19022	13899	11121	14249	11101	8021	8993	8034	6350	3031	4756	1986	2427	2380	2364	1806	2425	1902	10709	8747	12891	8510	6190	9247	5549	5678	5902	4415	6104	5286	5859	4231	3170	5169	3548	2892	14122	11223	11115	6114	7375	5949	3998	4479	3378	2380	1950	2374	1289
516.633	20416	15491	11255	14291	10036	7966	8415	7331	6001	2839	4465	2128	2282	2727	2337	1885	2554	1921	11242	10092	11088	8660	7545	9286	7530	4083	5588	3553	3923	5722	4197	3817	3008	4897	2495	2643	11484	11308	11139	6291	8067	5436	4169	4236	3521	2256	1909	2472	1046
518.633	19923	12476	11822	13814	11043	8450	9548	7387	5780	2441	4841	2219	2200	2567	2130	1996	2176	1611	10477	11362	9765	8410	7019	8808	5611	5135	7417	5086	5066	3684	4192	3497	3397	5079	3880	4073	13605	9314	10900	5411	6874	5727	4067	4196	3654	2140	2030	2200	1144
520.633	21209	17178	10547	14468	10811	8438	8259	6680	6194	2631	5144	2272	2547	2546	2563	2029	2394	2012	10963	11010	11835	8388	8089	7449	7292	5098	5903	3988	5536	5604	4393	3287	3118	3408	2832	3444	11949	12912	11162	6079	8348	6046	3631	4266	3535	2224	1816	2420	1125
522.633	21942	15817	11248	14555	11749	7406	8982	8266	7329	2910	5032	2078	2504	3011	2436	2015	2265	1967	10961	10852	13201	8381	8214	9087	7374	5845	7065	5065	3408	7307	4788	3592	5906	5176	4353	4719	12295	10937	11603	6292	8037	5930	4286	4221	3613	2240	1871	2305	1235
524.633	20392	16792	11305	15745	10182	7829	8335	5807	6604	2607	4569	2297	2520	2553	2339	2215	2325	1782	11302	9223	12636	8148	8046	9610	7649	4101	6203	3487	2824	5646	5211	2758	3122	5367	2992	2939	14258	10656	10448	4405	7535	6025	4322	4255	3623	2213	2056	2514	1317
526.633	21159	16621	11630	15753	11181	8549	8782	8674	6783	3007	4549	2283	2700	3177	2380	2124	2432	1993	11137	10971	10477	8489	8006	9447	5753	6089	5831	3984	2963	5838	4383	3235	3132	6180	2362	3556	14301	11279	11451	6005	8268	6147	4144	3998	3705	2389	1940	2677	1159
528.633	23485	17187	10462	15027	10728	7804	8201	8307	6581	2955	5417	2396	2602	2470	2317	2124	2580	2054	10412	9829	11053	9003	8655	9332	6740	5320	5767	4767	3000	5611	5086	5072	3073	3592	2135	4074	14235	10037	10443	6596	8044	6376	4446	4488	3869	2412	2014	2730	1284
530.633	20741	17294	11780	15542	11877	7750	8429	8280	5628	3188	5270	2284	2604	2754	2290	2245	2556	1846	10934	11428	10976	8672	8278	9485	6627	6574	4447	4189	3920	5540	4593	3622	5067	3431	4111	4569	13483	9640	11407	5935	8249	6273	4295	4385	3839	2554	1992	2678	1263
532.633	21533	17351	10912	15716	10669	7459	8811	8500	6366	2727	5037	2357	2580	3016	2358	1995	2212	2174	12281	11001	12363	8609	8229	9883	6686	5313	6027	5771	6139	5910	4900	3351	3289	4319	4086	3268	12720	8533	11689	6255	8150	6262	4596	4688	3888	2298	2065	2382	1390
534.633	22818	17258	12240	17504	12216	9332	8666	7648	6952	2906	5363	2398	2488	3235	2577	1829	2440	2055	11510	10387	12684	8696	8561	9838	6956	4004	5253	3714	2981	4670	4422	3535	2929	3798	4335	3381	13490	12091	11104	5916	8674	6413	4522	4597	3995	2763	2074	2536	1228
536.633	20497	17646	11927	15355	12170	9138	8999	8327	6362	2992	5110	2404	2472	2945	2444	2271	2536	2199	11920	11094	10885	7346	8971	7282	5815	7068	6818	4629	4244	6019	4634	3084	3702	3260	4183	4643	15101	8564	9495	6399	8220	6590	4423	4555	3976	2627	2114	2424	1263
538.633	20863	15015	12230	14307	11129	7830	8969	9155	7350	2786	5282	2341	2676	3061	2079	2040	2076	2169	8925	11394	12767	8139	7917	8172	6641	4980	6686	4729	3931	4458	3992	3361	3105	5054	4100	3368	13346	12929	11669	6368	8814	6551	4660	4719	3829	2596	1990	2631	1155
540.633	21915	13272	12735	17665	10926	8688	9100	8692	6153	3649	5088	2373	2928	3630	2438	2362	2734	2329	11472	11131	12382	8942	7856	8460	6059	4286	8848	4797	6380	4534	6077	3162	3173	4444	4506	3917	14956	10723	12222	5338	8975	6490	4600	4088	3988	2491	2188	2680	1347
542.633	20282	16343	12286	14404	12859	9019	9368	8413	6826	3538	5513	2593	2500	2835	2244	2007	2386	2226	11817	11318	10416	9334	7923	8962	8317	6820	6356	4565	3186	4582	4650	5225	3031	3386	3504	3587	12173	11187	10697	6409	8901	6456	4705	4148	3976	2608	2214	2907	1129
544.633	21549	13884	12598	14308	11787	8613	9399	7008	6992	3407	4009	2550	3012	2987	2791	2066	2657	1950	12554	11542	10627	8497	9443	9475	8094	6780	7855	6720	4329	4672	3584	2873	3231	6287	3168	4873	14896	9277	12149	6530	8593	6773	4459	4456	3973	2644	2130	2651	1449
546.633	20946	11835	13200	18003	11855	9762	8726	7504	6129	2858	4550	2606	2757	3059	2652	2461	2697	2207	11805	11987	13111	8825	6948	9160	7499	5752	7026	5956	4170	5361	3407	3675	2940	6483	4441	4621	15043	11518	11509	6033	8356	6046	4816	4486	4042	2808	2102	2545	1423
548.633	23262	15627	9800	16607	12226	7992	9479	8847	7380	2920	5743	2537	2756	3353	2742	2322	2777	2224	9817	11861	10375	8942	7119	8559	5552	3833	7333	3897	3448	7132	4277	4799	3297	4505	4508	2962	14847	11636	12241	7126	8753	6229	4875	4637	4130	2726	2196	2799	1592
550.633	20796	17870	11508	14329	11415	10073	8868	9370	6558	2876	5771	2775	3049	2944	2731	2488	2938	1634	11408	10759	10806	8966	6502	10085	7468	7352	6222	4934	6485	4787	4521	4108	2969	6756	3781	2426	12141	11455	10005	5458	8646	6982	4683	4392	4156	2665	2214	2975	1504
552.633	20256	15124	11862	16649	11631	9216	9391	8925	6457	3643	5627	2765	3022	3285	2460	2241	2420	2299	11699	11447	11937	8816	9009	10046	7747	8907	5158	4800	5674	4782	4187	4130	3178	3638	4285	4350	14204	11588	11914	6843	9184	6714	4812	4929	4149	2872	2285	2421	1389
554.633	22645	16682	13206	15723	10399	8460	9070	9394	6542	3702	5429	2533	2959	3455	2870	2531	2705	2392	11805	9041	12545	9125	8152	9150	7690	5054	7159	3860	5001	5030	3429	3747	3189	5067	4724	4493	14284	13297	11973	5474	8655	6906	4457	4617	4204	3039	2410	2305	1531
556.633	20551	17549	10452	17644	13191	9843	10049	6367	6600	3209	4613	2728	2779	3157	2535	2237	2536	2371	10218	12097	12295	8838	7875	9277	6895	6245	6114	7152	4072	5158	4225	3552	2949	3333	4232	4259	15155	11571	12724	6746	8956	6783	4820	4768	4081	2421	2321	2621	1366
558.633	23616	17915	13100	17625	12083	9666	8759	8192	6682	3782	5404	2749	3082	3253	2333	2208	3065	1633	9194	10952	11671	9094	8155	9376	6999	5573	6805	4297	3103	4950	6503	4153	3196	4614	3335	3620	14515	12368	12916	5605	8350	7091	4287	4933	4188	2833	2294	2770	1478
560.633	22132	19464	12916	16178	11899	9106	10977	9526	6356	3943	4279	2813	3230	3235	3046	2171	2590	2153	12108	10257	11589	9374	8427	9913	7384	5370	5454	4656	4667	4504	6636	4598	3857	5411	4446	2478	14837	10511	10423	6377	9141	6795	4926	5119	4018	2605	2346	2942	1219
562.633	22511	16424	12319	17018	10770	8615	9301	9394	6447	3979	6069	2608	2868	3407	2481	2180	2845	2712	11667	12172	11500	8632	6416	9672	8531	5337	6620	4547	4956	6474	5699	3381	3062	3698	2249	4773	15610	13674	12956	6325	9224	6707	5016	5174	4259	2794	2342	2898	1580
564.633	23447	17782	12072	15940	12559	9341	9728	8106	7795	3605	6239	2537	3041	3539	2960	2188	2761	2763	11996	9462	11305	8898	7698	9525	7476	4547	6340	6086	3959	4756	4497	3227	3765	4340	4511	2762	16092	11432	12609	4924	9338	7007	5045	5192	4532	2888	2584	2861	1410
566.633	23983	16147	12267	19393	12865	9083	10104	8877	7656	4113	5396	2957	2914	3394	2677	2448	2467	2279	12137	11256	12634	9211	7441	9019	6168	5713	6839	4693	3236	5841	4632	3320	4001	4546	2864	3474	15878	13314	11746	5104	8141	7069	5038	4985	4232	3021	2356	2686	1490
568.633	22481	18124	13377	19808	12948	8496	9404	9562	7454	3319	4274	2843	3231	3226	3049	3020	3229	2699	11029	8644	14134	9440	8091	9541	7447	5011	7259	6266	4816	4650	4855	4720	4572	3514	4810	4904	13165	11129	11177	6264	8967	7393	4857	5134	4164	2973	2443	2956	1591
570.633	25698	17333	10452	18930	13117	10701	10675	9708	6291	4069	4617	3068	3535	3428	3175	3015	3111	1999	11644	10239	13109	9002	7715	10178	7726	6786	5338	4808	3397	7211	3482	4154	4529	3983	1998	4369	16367	9410	12800	6461	8729	7145	5105	5152	4507	3094	2464	2946	1504
572.633	22296	14313	12162	16320	12037	9452	10918	9715	7348	4107	6214	2993	3438	2945	2703	2940	3120	2682	11241	9239	11420	9041	9223	9868	6804	5391	8497	4739	3147	6188	4870	3070	4398	6279	4486	4055	16110	11494	10560	7199	9603	6033	4889	5316	4496	2983	2378	3056	1648
574.633	23762	18138	12829	18230	14072	9511	9746	6983	7373	4036	5930	3006	3582	3460	2597	2623	2813	2640	11598	12452	10192	9293	8431	9808	6351	5478	9348	4619	4337	4721	4176	2900	3033	4896	2688	2687	12427	11362	13303	6957	9055	7241	5220	5350	4465	2922	2602	2773	1664
576.633	24169	12981	12175	20569	13687	9481	9758	9975	6653	3818	5967	2996	3602	3436	2763	2573	2489	2790	12316	12054	11376	8749	8489	9674	7676	6528	8388	7809	3304	6986	5117	5211	4047	4098	4295	5021	12308	9224	12322	6785	9610	7458	5161	5338	4619	2889	2610	3172	1766
578.633	23589	16094	13168	18821	12222	9705	10866	10045	7471	3291	5278	3172	3348	3027	2550	2559	2986	1736	9693	12112	13065	7557	8565	8685	6901	5654	7420	7937	4325	4820	4921	2760	3026	4832	4618	4460	16049	13206	12875	5802	9477	7453	5516	4944	4528	3244	2564	3101	1483
580.633	24747	18648	13348	14732	12857	10052	10363	9686	6804	4475	6275	3270	3110	3733	2564	2900	3416	3087	12265	11996	9616	8775	7316	10158	7345	5820	7182	4414	4320	5684	6170	3048	3193	3506	3152	2504	15360	11940	11606	7466	9285	7329	5080	5188	4575	2923	2677	3354	1806
582.633	23927	18870	12993	16846	13263	9411	9618	8775	6361	3360	4336	3237	3741	3378	3072	2883	2699	2766	12140	11174	11777	8881	8568	9511	7519	5038	5663	4617	3058	4574	4876	3078	4055	4942	2990	4395	16120	12460	11737	7167	9774	7520	5566	5194	4449	3125	2480	3145	1683
584.633	23019	17426	12726	19212	12339	9897	9828	10257	8568	4051	6132	3233	3646	3238	3134	3017	3072	2735	12536	11427	12853	9208	8503	10260	7402	4881	6441	5131	3279	6553	4667	4406	6002	3571	4650	4269	12934	13379	13189	6686	8987	7398	5304	5169	4771	3060	2669	2838	1649
586.633	23989	14276	12422	16655	13787	10930	10959	9614	7031	3945	5475	3142	3681	3335	2896	3081	3432	2735	11061	10900	11134	9065	8860	9530	7712	6214	6939	5277	5928	4865	4534	3948	3050	3504	4685	2726	13715	13937	13279	7055	8888	7757	5413	5301	4843	2828	2602	2972	1769
588.633	23928	18633	13660	17179	13599	10680	10364	8254	6035	3584	5342	2640	3463	3726	2897	2999	3460	2953	12477	12278	13982	9102	9976	10311	7072	5302	8835	4108	4008	4007	4587	3198	3220	5731	3989	4316	15049	12883	13375	7306	8427	7392	5343	5685	4682	3296	2591	3013	1599
590.633	22183	17372	13978	19757	13035	8681	10903	9811	6467	4140	5580	3032	3730	3538	3283	2807	3259	2627	11642	10941	12519	9296	8287	9651	7347	5373	5789	6140	3087	5878	6225	3054	3425	6657	4221	3390	14122	13489	13002	7199	10135	7516	5353	5442	4888	3382	2834	2581	1539
592.633	23183	17833	12630	19708	12398	10902	10736	9427	8691	3882	6338	3021	3841	3712	3214	3164	3468	3049	11876	10549	13380	9301	9514	9759	6438	5060	7197	6671	4766	4673	4891	4391	5747	6651	3116	4116	16853	12465	12931	6910	9983	7692	5472	5252	4497	3084	2863	3051	1795
594.633	22450	18051	12746	19853	13368	9086	11476	9547	7497	3535	5729	3439	3970	3606	3386	2966	3490	2499	12210	11918	11863	8978	8889	8502	7507	4959	8099	4720	5218	5415	4325	3819	3761	5309	2927	4944	15800	13165	12486	5836	9178	6786	5599	5301	4726	3286	2737	3014	1781
596.633	23019	18394	12189	18430	12854	10719	11205	10719	8126	3901	6668	3153	3947	3778	3297	3222	2990	2929	11904	12745	13820	9257	9679	10260	8306	5087	8864	4980	3379	4109	5373	3536	3131	6067	4827	4692	16796	10756	11839	7250	8786	7357	5455	5396	5033	3343	2726	3177	1546
598.633	24218	17643	14318	21837	13929	11360	10812	10613	7816	4289	6672	3074	3816	3615	3219	3511	3732	3171	8807	12425	13356	9505	8243	9701	5867	5516	7822	4559	4057	4937	3910	2577	5556	3811	4616	2779	16950	11063	13678	6733	8217	7785	5854	5072	4787	3437	2792	3295	1408
600.633	23120	18748	14258	16214	13514	8640	12165	10224	7388	3980	5158	2676	4058	3905	3360	2755	3421	2707	12233	12708	13013	9164	8716	10261	6908	5162	6100	6551	7145	4914	5339	3624	6096	6608	3310	5159	15582	12194	10497	7109	10083	7922	5945	5518	4922	3007	2982	3276	1631
602.633	24631	18274	14318	19694	14826	10219	11626	10649	6890	3858	5966	3616	4025	3903	2888	3199	2971	2774	12132	10479	11222	9287	8291	10263	7713	4776	8028	4900	3111	4753	4217	3460	2905	4940	3208	3841	16534	13658	13620	7204	9510	7172	5779	5345	4826	3414	2797	3174	1746
604.633	22529	18642	13246	20051	12631	10232	10926	10641	7604	4023	6697	3749	4122	3990	3192	3595	2463	2824	12494	12167	13392	9220	9978	9839	6709	5399	7067	5637	4837	4096	4859	3247	3348	3833	2683	3320	16229	11595	13254	6647	10103	7778	5733	5904	5080	2986	2851	3052	1765
606.633	24253	18975	14100	20054	14174	11332	10932	10368	7701	4379	6146	3383	3483	4040	3414	2558	3586	2336	12415	11544	14118	9559	8240	10582	8813	4554	8897	4572	4081	6047	5696	3955	3533	6735	4527	4718	16845	13272	13773	7317	9458	7793	5627	5385	5034	3080	2985	3057	1831
608.633	24172	18645	13048	19327	14560	9622	11446	8814	6976	4244	6698	3358	4183	3678	2962	3180	3619	2925	12546	12853	13372	9406	10425	10056	7955	5530	5462	4495	3468	4922	5232	4850	3303	3772	4297	4599	15128	10977	11708	6865	10643	7751	5798	5768	5008	3415	3086	2707	1810
610.633	24726	16075	12394	19853	13591	10336	10902	10686	8730	3909	7044	3406	4127	3932	3220	3308	3354	3227	9473	12479	12357	9281	9123	8293	8091	7061	7490	6047	6186	5444	3882	4319	3286	4216	4779	2919	16906	12710	13036	8013	10451	7990	5726	5718	4854	3577	2793	3310	1924
612.633	25051	18503	12896	18134	12410	11398	10853	7091	8146	4368	6708	3602	4220	3955	3707	3178	3622	3181	12374	12770	12895	8828	8434	10413	6877	7284	9026	5706	4461	7032	6719	3229	3352	5177	4428	3902	16184	8440	13931	7223	10361	8045	5838	6120	4990	3412	3056	3451	1967
614.633	24731	20233	12322	21014	14127	11198	10625	10552	8184	4227	6843	3601	3803	3837	2899	3462	3127	3326	12942	12292	13521	9204	8347	9581	8190	5425	6830	4528	3860	7192	4293	3279	3976	5025	4607	4715	16946	8876	14129	7373	10163	8003	5713	5417	5100	3658	3093	3281	2096
616.633	27455	18664	14389	20992	13708	11553	11827	7453	7973	3837	6569	3398	3754	4241	3175	3011	3766	3177	11980	10188	12310	9332	8582	9781	7894	5199	6460	8231	4560	6916	5577	3894	3156	4561	2457	4742	17572	12579	11375	6754	10438	8118	5415	5771	5059	3542	2835	3271	2148
618.633	24820	19563	14219	19518	14088	10313	11369	10455	7772	4860	7117	3872	4318	3753	3562	3149	3909	3101	12111	12311	13290	7590	9306	9158	6080	7443	6318	4085	3556	5469	4615	2844	3240	3141	4702	3753	17123	11563	13337	8028	8321	8165	5971	5239	5192	3494	3060	3441	1992
620.633	24718	18433	13662	22268	13559	11517	11573	9862	8240	5087	6267	3782	3896	4263	3806	3815	3522	3411	12288	12976	13601	9373	7704	8341	7924	5261	9659	5594	4650	5301	5056	3859	3597	6789	4244	4303	17032	14133	13683	5049	10624	8069	6021	5964	5274	3352	3067	3293	1585
622.633	27034	16724	13768	19511	15420	9518	10380	9215	8705	3904	6747	3591	4087	4064	3012	3847	3451	3235	12436	8699	13544	9823	7240	10051	7015	5684	9446	4684	4701	7058	4439	4294	6397	6036	4532	2554	14089	14104	12834	6623	10802	7970	5968	5758	5273	3492	2991	3375	1765
624.633	23016	18292	14448	18461	14577	10238	11743	8452	6963	3835	6832	3957	4010	4295	3235	3229	3047	3276	12397	12566	11408	9557	8568	10319	8122	6877	7884	5712	3382	6060	4101	2849	3537	4385	4362	5018	17112	11894	12863	6883	9255	8283	6089	5743	5218	3565	3188	3153	1990
626.633	24465	15758	13287	18975	15569	10825	11317	11832	8578	5079	7203	3676	4445	3995	3659	3593	3918	3088	11339	12232	14016	9178	9168	9590	8078	4620	9132	5200	6747	5300	4610	4552	6427	4924	4778	4595	14697	13967	14231	7598	9642	7824	5940	6100	5370	3290	3237	3181	1850
628.633	25703	13288	13747	20892	14624	11145	11362	10188	7127	4929	6652	3640	4360	4120	3532	3403	3115	2735	11036	9849	13827	9616	8381	8300	7688	4847	7152	5724	4965	6770	6807	3816	3320	4230	4739	4951	15292	14249	12824	7250	10272	7626	6237	6182	5053	3534	3294	3448	2103
630.633	28283	20054	12647	20041	15104	10846	11631	11299	8605	4402	7192	3899	4621	3899	3635	3499	3805	3750	12817	13187	14056	9021	9293	9179	8505	8953	5930	5413	6236	4942	4924	3747	3507	3851	3983	3763	17377	14303	13397	5855	10365	8102	6215	5272	5217	3520	3093	3439	1905
632.633	28015	19447	14264	22748	14286	11289	11213	6921	8924	4824	7485	3941	4810	4298	3179	3909	3367	3357	11567	11134	14015	9655	10118	10444	6294	7780	7513	4975	3268	5120	6548	3587	3330	6237	4007	4426	14517	12928	14102	7050	10666	8134	6121	5622	5389	3358	3201	3765	1975
634.633	24777	19736	13615	21679	14322	10794	12569	9491	7622	4793	6162	3841	4672	4583	3885	3651	3696	3418	10384	10908	12116	9489	8780	10503	7959	8397	8076	4655	3920	5068	4051	3437	4875	4724	3614	3729	16635	7712	13966	7593	10794	8392	6243	6348	5159	3260	3131	3748	2127
636.633	25439	16641	14161	19601	14619	9495	12484	11510	7679	4341	7167	3638	4591	4429	3124	3892	3593	3729	12924	11807	13112	9661	9777	9534	7963	5437	5504	8086	3560	6245	8377	4113	3265	4201	4885	3608	13172	8956	11304	7842	11449	7978	6187	5026	5360	3596	3307	3390	1976
638.633	23032	18440	13478	22358	14391	12235	11150	9310	8241	5390	7215	4192	4273	4186	3938	3217	3130	3747	11523	12507	11990	9293	8886	10238	7698	6066	8366	4949	6064	6762	5464	4233	3232	3859	3278	4747	17139	10849	12243	7115	8915	8249	6014	6056	5063	3751	3415	3613	2033
640.633	25873	16667	13301	21720	15730	10647	11200	9128	7080	5559	6860	4256	4942	4010	3350	3392	3617	3660	10983	12427	11157	9699	8779	8694	8142	5799	8915	5776	4345	4934	7495	4834	3098	3752	4970	4269	17397	10877	12987	6614	9480	8340	6197	5546	5555	3703	3135	3536	2147
642.633	25298	16336	13322	19587	14001	11439	13048	8076	7500	5438	7162	4210	3988	4476	3870	3973	3345	3475	12120	10353	13397	9521	7741	10563	7133	5661	8729	4874	3189	10150	6673	3683	4243	4329	4642	3949	13442	11422	13997	7239	10496	7163	6115	5666	5386	3778	3469	3520	1923
644.633	26539	19517	14351	22046	12557	11141	14659	11755	8166	5071	7462	4166	4910	4353	3788	3958	3682	3422	12758	12751	13455	9382	8590	10572	7139	6421	8047	5443	5073	5109	6531	3971	3271	5337	2502	2363	17830	13709	13947	7138	10797	8360	6341	5921	5512	4127	3256	3438	1755
646.633	24500	18686	12519	23555	15220	12068	11974	11559	8013	4204	7194	4156	5015	4052	3613	3929	3783	3817	13047	12866	12151	9581	7805	9977	7920	4450	6758	5397	5261	6036	5655	3382	3357	4098	4248	3697	17169	11086	12671	7756	11439	7388	5930	6629	5702	3910	3436	3551	2256
648.633	24019	20020	15678	20045	14698	11446	12249	10991	8223	5327	7602	3394	4847	4408	4009	3724	4108	3756	12934	13201	12721	9397	9515	10198	8352	5732	6652	5155	4394	8978	5878	4687	3482	7681	4737	4037	15670	14914	14389	7784	10586	8384	6264	5668	5428	3429	3502	3453	2271
650.633	25217	17945	14224	23964	14015	11867	12998	10994	8763	5603	7477	4235	4249	4427	3673	3341	4380	3573	12677	12235	11143	9898	9012	10200	8375	5421	6859	5189	3893	4981	3804	3359	3867	5534	4591	2723	16099	10753	14053	5128	10870	8382	6259	5592	5529	3989	3501	3587	2274
652.633	25658	20124	12555	24067	12565	12730	13314	11856	8159	5291	6804	4516	4800	4405	3724	3373	4002	3754	13449	12648	12298	9544	9044	9856	7650	5348	8593	4495	3913	4337	6612	4861	3087	3646	4942	3317	17443	14626	13918	7192	10250	7202	6614	6051	5388	4162	3445	3331	2475
654.633	25705	19665	13831	22932	15039	11856	13569	12059	6878	5833	7155	4269	5020	3906	3586	3736	3839	3491	11582	12994	11758	10343	8454	10898	7817	6989	6574	4101	7193	5120	5100	4097	3318	6892	4807	4391	17986	14271	14548	7244	11082	8672	6183	5444	5418	3865	3644	3558	2422
656.633	27611	17720	14599	19670	15239	11001	11809	11820	7752	4537	6273	4167	4406	4707	3571	4256	4244	3881	13555	10874	12684	9829	7763	9210	8024	7831	8315	4493	5662	6638	5347	3248	3306	7012	4817	5236	14658	13844	13433	7265	11177	8562	6496	6566	5624	3924	3556	3849	2395
658.633	25946	19523	14811	23976	16504	9857	11657	11835	8162	4887	7813	4061	4643	4174	3991	3677	4225	3723	12176	11957	13157	9682	9103	10098	6794	5514	9180	5130	4180	7082	5243	5149	3837	3978	3294	5041	15942	13985	14082	7150	11029	8524	6398	5688	5722	3909	3593	3946	2366
660.633	26867	20070	13896	22935	15234	9984	13108	11935	8244	5861	7768	4785	5241	4519	3948	3745	4186	3532	9652	11509	14071	9964	9627	10358	8139	5669	10438	6129	4088	4964	6942	3678	3459	4981	4899	3696	17971	14653	13309	6989	11130	8578	6524	5963	5709	3633	3347	3603	2215
662.633	23609	18489	14654	24041	15354	12374	13719	12268	8417	5116	7319	4259	4333	4519	3897	3889	4291	3733	9713	12671	14860	9562	9096	9933	7351	8907	9105	6048	3617	5721	5642	3375	2937	4925	3746	5370	18125	14999	13754	7180	11467	8265	6320	6205	5702	3695	3305	3327	2535
664.633	25828	19285	15047	22618	14864	11857	11283	11068	8210	5447	6788	3476	5350	4998	3281	4136	4049	4062	13232	12541	11475	9781	8972	10453	7660	8412	6871	5092	3656	5108	4913	4141	3255	5728	4760	5075	18023	12544	13930	7751	11119	8704	6804	6738	5655	4136	3452	3454	2010
666.633	27242	16625	13434	22270	15972	11130	13869	11258	7559	5606	6971	3936	5186	4417	3808	3882	4292	3719	12534	13665	13961	9460	9410	9340	8176	5079	8055	5209	6141	5664	6680	5718	3399	4788	2144	4889	15239	13624	13969	7137	11646	8665	6543	6434	5403	4118	3747	3601	2501
668.633	26789	17650	15483	23152	15061	10531	13552	11597	8010	5308	7845	4258	5482	4100	3372	4408	4378	4055	10673	12325	12050	9480	8324	10746	8370	5879	8081	4959	3747	5152	6264	3852	5363	4794	2908	5114	16737	13429	14874	7138	9790	8418	6514	6258	5780	3799	3603	3531	2393
670.633	27153	15253	13553	20440	14692	9422	13281	11663	7064	4485	7808	4504	4753	4409	3816	4313	3393	3545	12389	11758	13783	9672	8060	9481	7656	5203	6962	4685	5740	5495	4979	3913	3519	6550	2361	4517	16844	12278	13510	7534	10232	8637	6595	6116	5795	3938	3606	3260	2037
672.633	24798	20420	12352	22760	15187	9824	13295	8912	9397	5390	7698	4668	4760	4437	3436	4365	4953	3665	12920	13248	12878	9846	8339	8476	7875	6428	10036	5225	3342	5080	5854	3310	3581	5300	3048	5312	17299	8685	14252	7342	10777	8786	5865	5872	5876	3833	3756	3611	2246
674.633	27738	19785	13533	20115	15992	9818	11368	11597	7498	5074	8083	4472	4867	4412	4254	4064	3446	3707	12647	11710	14774	10081	10022	10165	7570	5917	9320	4363	3283	5768	5246	4034	3288	3824	4693	4976	18153	10692	14309	6625	11529	8718	6054	6531	5932	4151	3561	4228	1940
676.633	25159	14224	15302	24485	15337	12440	12288	10722	7962	6156	8261	4226	4927	4832	3934	4807	4453	4277	13445	12345	11734	9781	8874	10631	7418	6128	7850	7765	5514	5191	5405	4578	3336	5842	2952	5251	17580	13717	13855	7883	11050	8708	6681	6523	6035	3705	3568	3602	2435
678.633	24096	18877	12718	24771	15292	13056	15264	8856	8815	5868	7615	4767	4712	4302	4211	3539	3880	4333	9702	13675	12745	8715	9208	8992	6709	5900	5638	4889	4153	8144	4110	3900	3254	3655	2275	4803	18059	10689	13458	7650	11507	8960	6327	6681	5988	4215	3626	4058	2399
680.633	26596	19780	15239	18391	15246	12961	12152	10375	8691	5655	7068	4641	4707	4359	3510	4766	4186	4000	11420	11847	13788	8899	9170	10588	7482	5548	6162	6142	4147	6321	4124	3626	3590	3810	2460	4157	18156	14884	15056	7706	11262	7858	6350	6176	5324	3759	3664	3849	2384
682.633	24861	19494	14922	18667	14846	10805	16371	11968	9342	6161	7984	3996	4997	4622	3759	4830	4986	4138	13433	9230	11701	9538	8281	8181	8246	5554	7438	4832	3372	5199	4010	3413	3343	5696	4604	4628	17150	12596	14121	8094	11449	8876	6125	6692	6159	3845	3750	3766	2734
684.633	26534	19479	15298	22274	14821	10909	12501	10345	7156	5898	7984	4234	5839	4494	4223	4915	4375	4374	11393	13536	11761	9330	8665	10065	6736	6246	7717	6083	7228	5141	4944	3348	5079	3787	3320	3445	17836	12841	13758	8684	11149	8705	6817	6727	6026	4277	3550	3780	2451
686.633	26151	20451	15138	20653	15618	11818	12949	12875	6901	4864	7546	4890	5637	4801	4641	4932	4925	4313	12926	12484	12548	9378	8393	8481	7246	7248	7384	4240	5114	5720	6164	4692	3047	4276	5102	5189	18091	15430	13137	8006	11452	8710	6854	5689	5747	3842	3798	3622	2241
688.633	27266	17633	13069	22920	14423	9847	12584	12524	8111	6196	8085	4680	5733	4751	3537	4581	4734	4241	13119	11857	14136	9702	9788	9359	7883	6150	9548	7987	3696	5073	4554	4510	3178	7549	4491	3386	18296	14562	15164	8394	10433	8600	6657	5645	5804	4406	3691	3937	2652
690.633	24206	19933	12686	24457	15451	11551	14506	11901	9839	5134	8277	4252	5538	4765	4317	4314	4473	3007	13779	12463	15107	9765	9408	10711	7758	6208	6860	5594	4910	8527	4814	3532	3815	5183	3688	4597	17175	12498	13967	6499	11801	8961	7213	6918	5991	4048	3977	4126	2631
692.633	26668	16238	12984	23120	16049	12268	13373	11647	7820	5644	7799	4553	5538	4400	3659	4280	4679	3944	10698	12967	14029	9607	8414	9955	6895	5629	6037	7996	4051	5993	5112	5042	5215	5102	2518	4473	18125	13902	15042	8189	10675	9150	6874	6417	5618	4318	3780	3575	2669
694.633	27305	18482	14499	24267	14929	12296	12921	12190	9609	6387	8023	5080	5782	4693	4437	4218	4342	4662	13318	10159	15261	9092	9125	9874	8533	5721	9500	4393	3891	8377	4420	5508	3526	4646	4269	4372	18512	13604	13486	7865	11253	7905	6562	6630	5911	4088	3984	3643	2524
696.633	26136	17550	14927	19524	16452	12332	13964	11767	8118	5395	8060	4833	5917	5138	3652	4435	3982	3055	12650	12444	13676	9553	8449	7652	8136	5612	9197	4757	4300	5703	6923	5565	3235	3813	3914	3849	13947	14157	12105	7719	11449	8323	6911	6867	5853	3828	3941	4525	2227
698.633	26301	20246	12877	21608	16897	13077	14549	12198	8231	4817	8653	4565	5170	4369	4044	4663	4265	4444	13811	13233	11379	9461	8712	9905	7081	5209	7530	4729	6832	5069	5171	3724	3417	5472	3830	3503	17943	14085	15383	8148	11493	9012	7120	6666	6159	3917	3658	4017	2859
700.633	29433	21087	15798	24784	14206	10218	13139	12332	8331	5995	6356	5204	5837	4941	4393	4977	4017	4253	12700	10375	12833	9696	8289	9908	8683	9002	10030	4801	3891	5324	5603	3702	3626	4048	4843	4539	17976	15156	14709	7687	11797	7810	6633	6174	6129	4294	3846	4094	2816
702.633	25908	19542	15442	25520	16732	12108	13734	12249	9487	6226	8434	4700	6067	5125	3872	4815	3895	4035	13805	12844	13782	9968	9102	7378	8273	5590	9096	6963	3430	5598	4332	3456	3719	4174	5067	4402	17388	13684	15096	7714	11375	9392	7203	6973	6038	4363	3897	4058	2738
704.633	27745	20867	13698	25107	13877	11372	14725	9782	8132	6609	7341	5384	5321	4766	3544	4476	4033	4448	13537	12470	14850	9270	9241	6228	8250	8204	8910	5813	5205	9102	7886	3520	3388	3942	4265	5370	18381	11104	15578	7720	11588	7474	7204	6867	6084	3918	3783	3715	2360
706.633	26941	20336	14194	24111	14878	11567	14127	12381	9150	5149	7176	5369	5815	4821	4447	4850	4699	4618	13625	12869	12569	9838	9405	10745	8002	6443	8495	3966	6009	4709	7872	3894	3412	8560	4732	5161	16527	14170	15230	7542	11711	9188	7006	6963	6416	4021	3841	3976	2827
708.633	24883	21090	13359	22030	14282	12918	12504	11217	9769	6396	8154	5364	5583	4405	4096	5249	5035	4570	13144	10880	11768	9570	8910	10248	8076	6104	9221	5230	6152	6008	4838	3243	4681	3652	3028	2975	18839	9910	14200	7432	11778	9122	6873	5294	6187	4516	4000	4127	2544
710.633	26929	19748	16105	22380	17301	11250	14305	10875	9696	5158	7508	5350	6387	5306	3935	4343	5021	4646	13772	11162	13623	7664	9520	10579	7658	6372	6116	4948	3322	10503	3730	3898	3322	4103	2973	3192	14626	14795	14776	7907	9854	9324	6871	6252	6220	4166	4016	4286	2493
712.633	26397	20667	13804	25003	16593	12415	13935	10972	8502	5579	8156	4827	6356	4833	4120	4278	5097	4299	11205	13846	13652	9842	9208	7351	8171	6070	6325	6139	6515	8521	3976	4568	4466	6120	4773	2988	18654	15676	15246	7634	11258	9196	6608	6325	6412	4407	4227	3945	2358
714.633	28080	20792	14944	24393	15893	11546	13677	11478	8363	5207	6343	4742	4974	4122	4417	5138	4889	4404	12024	12547	15495	9713	8299	9418	8318	7288	6607	4874	3548	5029	7244	5636	3759	4155	3172	4368	16766	11846	15055	5727	10824	8614	7272	6825	6309	3828	3975	3857	2751
716.633	28185	19833	13789	24877	16072	12130	14699	13178	8762	6662	8591	5394	5994	5051	4076	4419	4923	3491	13722	9974	12193	10009	9082	10500	8223	5857	6280	5090	4290	5536	4715	3679	3671	6167	4292	4826	17855	13330	14026	6747	12227	8968	7058	6789	6410	4198	4004	3770	2513
718.633	27715	21246	13750	24135	16549	12868	13130	12181	9021	5849	6689	5391	6395	4792	3887	4929	4490	4852	12609	12981	12679	9910	7196	10274	7815	5523	6767	4790	4136	5420	5722	4067	3540	4983	2301	4603	17051	11918	15033	7614	12009	8816	7179	6789	6226	4577	3944	3999	2729
720.633	26502	16139	15288	22742	15000	12781	14154	9784	7687	6792	8417	5202	5481	5615	3671	3956	4279	4693	12818	12756	14411	8338	9247	10855	8556	5504	6101	5473	6371	5157	4678	4578	3276	5138	5069	4597	14015	12331	15538	7269	11870	9186	7228	6592	6304	4164	4034	4211	3026
722.633	24525	18196	15490	21480	16315	12620	14116	11314	8302	6728	7585	5036	6429	5348	4815	4973	5147	4634	14551	9741	12952	10113	9815	8389	7494	6579	7679	4062	3867	5119	5533	3262	3573	4226	4240	3231	18916	14017	15332	8480	11460	9282	7092	6869	6495	3968	4058	3789	2997
724.633	28146	21083	14844	25984	16530	12000	14424	11278	8998	6402	8233	5411	5138	4669	4937	4713	4510	4613	13546	10748	13826	10029	8207	10812	8322	6284	8179	5340	3459	6457	6606	3397	6270	5212	4277	3837	18727	14938	15444	7672	10413	9542	7189	6938	6409	4833	3737	4345	2776
726.633	27205	20722	14943	26739	15831	12972	14526	13054	8957	6862	7021	5640	5962	4570	4828	5330	4278	5027	13813	11580	12550	10056	8836	10245	8605	5628	6370	4773	3521	5302	4570	5440	4224	5412	3954	2556	16730	11170	15367	6286	12001	9543	7297	6876	6246	4596	4388	4336	2609
728.633	29604	18313	15943	26247	15753	10619	12589	10076	9250	6338	8560	4692	6397	4821	4780	5221	4374	4209	13489	9953	11322	10281	8732	10442	9251	5277	9391	5478	3526	6201	7791	4190	4211	5020	3981	4367	15723	14802	12537	8197	11485	9422	6756	6726	6381	4141	4119	4136	2788
730.633	27749	18901	14450	24206	16556	10632	13532	12716	9407	7010	7811	5669	6472	4837	4718	4171	4045	4731	13011	13087	13397	9341	9168	10258	7289	6117	9596	5218	4292	5631	5404	5916	3431	4903	4072	5061	19067	14481	15060	7396	12192	9577	7239	6732	6511	4080	4191	4378	3112
732.633	28628	21131	13782	26440	16318	11684	14289	13216	8195	5684	8125	5714	5974	5067	4626	4708	4471	3386	12556	12058	11968	10047	9299	10032	6909	6434	6673	4760	3653	7736	5087	4561	3586	3951	2526	4779	19116	12574	15292	8670	10576	9253	7104	6901	6335	4824	4276	4097	2739
734.633	28626	17300	14259	21543	15507	13044	13502	10498	8814	5873	8985	5460	6678	5258	4431	5522	5053	4346	13925	12349	12811	10005	9328	9734	8041	6570	6671	5024	5886	5485	5581	3717	3502	6706	2488	5555	19170	14804	15374	7457	12370	8246	7502	6928	6321	4959	3879	3882	3025
736.633	27900	20848	12200	20360	16968	12829	13348	12911	10311	5299	6618	4953	6450	5234	4223	4206	4367	4778	13592	11938	12332	9796	9618	9138	7860	4253	7027	6147	4017	5217	4935	3727	3535	5000	4814	5257	19157	13884	13712	7928	11392	9560	6835	7168	6315	4840	3876	4260	2944
738.633	28092	18615	15247	20715	16286	14239	14425	10031	8645	5266	7387	5123	6490	5082	5002	5712	4928	5028	13335	13358	15193	9936	9439	10362	7253	5128	9049	4303	3723	6044	5282	4624	5432	4900	3061	4289	16774	12090	15202	7712	10857	8935	7232	7004	6464	4808	4193	4087	2967
740.633	27314	16454	14574	26492	15814	12803	14194	12014	7455	6785	8786	5822	6484	5097	4717	4780	4683	4991	13873	13034	14190	9643	8253	10787	6882	6305	7680	4428	5898	5914	4198	3976	3006	4207	3694	3418	19217	14314	13962	8035	11832	8578	7087	6453	6258	4253	3545	3460	3053
742.633	28949	21104	14772	21764	18394	14419	14438	11729	9011	5874	8310	4800	6697	5177	4619	5200	4561	3594	13748	12828	15482	10238	8559	10781	8152	5735	7398	4976	3660	5729	4841	4683	3739	4162	4643	4579	18948	15097	14899	8258	11976	9473	6888	6750	6470	4809	4439	3998	3187
744.633	27264	20167	14901	24830	17065	12916	14577	12434	9780	6515	8848	5109	6790	4694	3855	5501	4856	4522	9677	13049	14188	9808	9859	10918	8477	7748	9544	4596	4161	6842	5443	4046	3568	5871	2830	3190	18885	15394	14740	8134	11575	9176	7371	6904	6462	4459	4168	4106	3314
746.633	26537	20875	15748	22518	15270	11647	16465	10190	8329	6566	9036	5938	5906	5487	4904	6069	5220	3742	12538	12991	13917	9544	8765	10946	6891	6060	9484	4763	3839	5370	5082	3462	3586	6739	3251	3464	18913	9160	14433	7705	12049	9425	7732	6998	6456	4851	4242	4214	3359
748.633	27015	20623	14717	23182	16794	13147	15783	9107	9542	5918	8779	6076	6664	4483	5147	5574	4477	3261	13485	13697	14394	8108	8369	10721	6878	5626	7758	4953	4898	4302	4075	4823	4078	5165	2715	2488	19096	12991	13008	7742	10636	7735	7425	6602	6802	4278	3729	4371	2695
750.633	28499	20459	15965	26911	15698	10715	13459	12717	8261	7264	9085	5011	6819	5496	4767	4251	5227	5028	13392	14059	14766	10074	8254	10613	9006	6969	6918	4464	3122	5398	5712	4089	5805	4077	3053	4840	18524	12024	15546	8580	12358	9331	6880	7175	6565	4398	4183	4252	3020
752.633	28457	20087	16171	21228	16253	11201	14939	13220	9057	6349	8557	5522	6971	5216	3975	5210	4413	5301	11236	12834	14796	10049	10078	10874	6760	7097	9082	5233	3986	6683	4096	4286	4229	5321	3559	5199	18586	12066	16000	7158	12386	9585	7545	7261	6358	4842	4321	4147	3056
754.633	23946	21235	15116	26206	14905	12493	14747	13160	8534	7026	7081	5324	7079	4952	4097	5463	5163	5153	13477	12984	12630	9849	8760	10289	7697	4423	9595	6532	4092	7378	6735	4904	3544	4475	2643	2669	19411	16001	14957	7327	11650	9752	7449	7273	6798	4598	4271	4219	2817
756.633	28404	17063	16121	25073	17928	11455	15268	10350	8660	5857	7994	5741	7110	5246	4514	5425	5275	4924	13629	12279	14990	9645	8443	8574	9421	5780	10095	5742	6699	5276	3981	3705	4551	3869	2777	2971	19384	15340	14457	8283	11606	8838	7675	6255	6770	4814	4175	4172	2574
758.633	25414	20890	15320	21900	16501	12700	15019	12646	8319	6890	7448	4956	5598	5170	4511	5793	5567	4367	13119	10934	13990	10418	9084	10050	7254	6332	8640	5837	4198	5218	5324	3891	3804	5106	4945	4775	19445	13930	15158	8704	10876	8745	7758	6003	6070	4697	4374	3531	3190
760.633	26938	20044	13659	22104	15262	11909	13795	13297	9200	6963	8988	5156	6859	4838	4588	5962	4618	5119	12001	12112	12529	9574	9404	10651	8222	5043	6502	4838	5708	5305	4155	4047	3617	5446	4957	3368	17603	15030	15646	5158	9592	9621	7991	7205	6680	4557	4323	4264	3320
762.633	28020	21071	16396	24921	14722	13409	14129	13755	9174	6426	8382	5778	5971	5862	4455	5604	5079	5548	14029	13637	15429	9497	8808	7330	6707	5400	9745	4339	6785	7013	6866	4102	3818	7376	5060	4853	19335	10800	14502	7835	12102	9317	6735	5794	6469	4415	4461	3896	3027
764.633	27902	20587	16910	22851	18293	13173	15318	11972	9910	6547	9008	4800	7082	4772	4963	6217	3711	4233	13743	13470	14386	10108	9685	9382	6690	6593	10225	4727	6237	7235	4592	3408	6236	6264	4592	3862	19512	14167	15019	8872	12103	9672	7332	6799	6679	4768	4371	4702	3070
766.633	29244	21328	13425	25744	14971	13315	13244	11334	8995	6157	8846	6368	6550	5256	4267	6306	5495	5044	13632	13099	12394	10185	8153	11135	9572	7006	10462	6593	6707	5366	4351	4613	3656	5542	2973	3643	19072	15185	14047	8410	11564	9846	7434	6864	6719	4593	4079	4359	2946
768.633	25436	20727	15522	26168	16973	11393	14700	12923	8953	5676	7113	6711	7161	4701	4304	5695	5772	4405	14133	12943	16082	9991	10535	9748	8486	4172	9225	4403	5937	5302	4704	4551	3634	4158	4243	5525	19396	15511	15214	8337	11403	9994	7496	7179	6807	4484	4399	4029	3635
770.633	26647	16618	14713	25271	16529	13927	14017	8991	10651	6961	9055	5458	6658	5292	4608	6387	5622	5298	10897	13698	12737	9673	10403	9792	8453	6949	7583	5040	5596	6806	6069	3987	3215	7467	2646	4376	19295	14738	11965	7932	12213	7755	7486	6630	6734	4840	4523	4790	2811
772.633	29475	17843	14414	24315	14810	13253	16357	12969	8344	7269	8451	5601	7198	5797	4315	4566	4997	5037	13849	13046	14781	10245	9515	10156	8376	6352	6379	5625	3843	5658	5424	3723	3542	7294	3861	4292	19486	14322	15673	8206	12211	9534	7469	6707	6726	4645	4245	4389	3156
774.633	27596	21334	15863	27648	17099	14679	13774	12118	9821	6127	8741	5767	6009	5724	5439	5666	4425	5624	13182	13253	12111	9556	10183	10603	8757	10185	9607	7069	4440	6821	5114	4613	3876	7438	4960	4818	18637	10080	15044	8934	11898	9801	7575	7061	6851	4922	4347	4306	2909
776.633	25296	21348	14646	23845	17386	14757	13820	12425	10969	7181	8050	5554	7198	4952	5137	5609	5458	4497	13919	13029	13587	10158	9352	8958	8841	6174	8159	4594	4691	6225	4973	3840	5447	5027	4347	3671	19016	15105	13378	9274	11187	9739	7634	7082	6682	4412	4732	4524	2851
778.633	27461	21185	16620	21742	17847	11404	14092	14151	8363	6991	8102	4993	7502	5678	4918	5117	4399	5229	12154	12092	13729	10273	10219	10961	7726	6144	7272	4642	3606	6770	7441	3418	3738	5680	4946	4562	17736	14514	15656	8476	12471	9626	7807	7382	6686	4666	4346	4279	3204
780.633	25598	20421	16115	28246	17470	13154	15645	10488	8537	7349	8740	5751	6545	6112	5291	5451	5665	4409	14456	11430	14628	10040	10131	10448	8653	7047	9076	5197	3993	7034	4790	4362	5579	4176	3015	5172	19407	13910	12458	8116	12060	9676	7682	6741	6899	4547	4402	4277	3307
782.633	30569	20078	14040	26301	17519	11653	14953	13190	8583	7716	8471	5238	7555	5856	4753	6142	5656	4998	13837	13788	14207	8754	8463	10078	8467	6769	6923	6019	6608	6148	6611	3743	3499	4878	3900	3493	19524	11245	14810	7564	12288	9741	7782	7607	6754	5136	4474	4494	2839
784.633	31747	15837	14153	26221	15971	13964	13941	13920	8532	6116	8601	6289	5889	5865	5155	5904	5754	5202	11392	13008	13039	10434	8792	10317	7093	5562	8382	4324	3939	5644	7824	5205	3814	8649	4921	4348	19441	15461	14530	6308	12688	8969	7909	7535	6628	5108	4559	4623	3317
786.633	24266	18782	14098	26813	16962	11275	13454	13298	8042	7343	8377	5366	6704	5278	3691	6204	4452	4216	12835	11303	14420	10043	10756	10663	8773	8716	8943	5435	5399	5155	4726	4543	4750	4642	2866	4502	17333	16111	15694	8944	12756	9285	7668	6773	6828	4970	4603	4540	2898
788.633	26850	20484	14974	27228	17118	10593	14731	10626	10019	7486	9015	5562	7593	6139	4672	6087	4948	5598	13979	13847	15356	10077	8972	6674	6842	6149	6716	5023	3704	7244	6520	3686	3766	3896	4856	4882	19670	13289	16062	8642	12957	9886	7744	7439	7110	5149	4598	4422	2919
790.633	29326	20448	17239	23093	15965	14439	14506	12695	9520	7129	8228	5552	7466	5665	5378	4712	5391	5337	13000	13040	13069	10618	9496	9230	8559	5708	8643	4725	4025	7209	5883	4852	3518	3803	4953	3551	18650	14982	15663	9120	11637	9233	7820	7297	6950	4800	4503	4022	3465
792.633	28710	18291	17773	27004	18072	11511	14816	10921	10160	7440	7787	6173	7364	5115	5251	6516	5478	4469	13316	13152	13771	6733	9377	9642	7206	5645	8927	5365	6245	5719	4521	6140	3723	7798	4581	3322	18703	15021	16372	9179	12039	10102	7847	7225	6987	4918	4946	4537	3482
794.633	26742	21374	13808	24228	16557	10997	14954	12426	8239	7424	8780	6116	7625	5292	5289	6414	3489	5218	13423	13209	14670	9857	9723	10091	8524	4824	4950	4278	3701	6056	7151	2928	3975	7606	4659	4848	18942	16023	14394	7451	12165	10439	7248	7643	6702	4732	4606	4145	2689
796.633	29245	21543	14304	26614	17454	12184	14238	12993	9600	6584	9279	5654	6785	5538	5473	5409	5833	5344	11471	12375	13273	8497	9138	10675	8617	7156	7728	5260	4178	8881	5687	3446	3886	6100	2923	2667	19351	15992	15407	8571	12661	8820	7054	6394	6949	4872	4596	4146	3053
798.633	28984	20783	16555	25918	18453	11335	14038	12922	10007	6955	9023	6618	7213	6114	5074	6340	5960	5381	13626	13626	13362	10074	8742	10392	7160	6556	6531	6208	3759	5797	4676	4841	3779	4629	5275	4800	18943	13371	15506	8647	12317	9841	8107	7890	7075	5215	4671	4705	3018
800.633	27826	19675	16323	27016	16801	13920	15828	10618	9776	7815	9371	6264	6141	5968	5376	6093	4597	5071	14377	12842	15008	10177	9597	10959	8953	8522	7414	5704	5461	5409	5399	4125	3790	6207	4086	2558	19634	14489	15673	8762	11214	10088	7873	7769	6787	5025	4601	4777	3117
802.633	26733	20974	16090	24757	19162	12356	16351	13138	8732	5811	8442	6034	7507	5966	4403	5560	5503	3438	11416	11058	13950	10188	7144	7113	8913	10165	9540	4940	6667	10003	5470	3282	3681	3677	4081	3854	19989	15238	16291	7648	12472	10411	7990	6890	7246	5116	4744	4271	3396
804.633	30796	21304	17198	23509	17885	12337	16936	7698	8818	7761	9645	6532	6272	5618	5107	5804	5436	5562	13747	13685	13710	10068	8079	9260	7606	5827	8761	5721	3999	7425	5574	5247	3722	6993	4919	4705	19870	11538	15396	8002	12231	10120	7817	8066	6390	5286	4671	4125	2872
806.633	25483	20661	15786	27498	16470	14306	14111	11312	10731	6222	8132	6305	7822	6003	4984	6856	5936	4268	13769	13383	14840	9799	9333	11119	8050	7043	9363	4823	3209	5485	8067	4497	3865	4354	4989	3966	19505	11982	16257	9100	11343	9649	7609	7901	6643	4617	4601	4557	3183
808.633	28089	18863	14845	28344	18427	12567	14006	12319	10500	7892	9188	5671	7873	6230	5014	5720	4432	5607	13854	12845	13531	9942	10524	10657	7891	5658	8181	5079	3602	5422	6743	3208	3543	4039	4238	2618	17063	15800	14348	8293	12299	9379	8121	6932	6871	5285	5048	4396	3139
810.633	28643	21905	15530	25862	17109	11762	14524	14019	9926	6947	9201	5648	7337	4937	4314	6302	6008	4397	14299	12960	15248	10157	8901	10273	9308	6031	6038	4613	5944	6472	4121	5979	3987	4972	4973	4594	19591	12076	12994	8474	11946	10014	8230	7769	7392	4436	4558	4899	2891
812.633	27602	20931	14671	25630	18898	15133	14921	13414	8077	5747	9370	5644	7502	5847	4640	6754	5964	5849	12600	10475	12537	10351	9649	10126	7743	6626	6497	4140	3839	5647	5150	3919	3630	6160	2737	4724	17934	15499	15768	8178	12834	9876	8042	6909	6930	5202	4716	4837	2967
814.633	28715	20906	13897	21188	18834	13598	15159	13796	9184	7577	6957	5809	7773	5336	4525	5551	4384	5300	11457	13563	14757	10176	9165	9793	8646	4824	11109	4623	5488	5717	5412	3178	4264	5980	2863	4956	20090	16155	13228	8465	12235	10292	8026	7361	6983	4925	4356	4426	2641
816.633	27991	19941	13738	27378	18176	14276	16238	13981	10315	6573	9797	6217	7955	5796	5674	6134	5393	3792	14299	10326	13248	9803	9635	8559	7522	6042	7412	5703	5166	6956	5707	5392	4275	4427	4311	3374	19983	13362	16330	8360	11754	10281	7965	7963	7301	5020	4475	4459	3716
818.633	28428	18979	15480	21629	18007	13329	15727	14090	9288	7569	9433	6307	7538	5756	4728	6377	4144	6002	13875	13866	15392	9773	11216	7874	7126	8496	8803	6350	5025	6849	6966	4001	3723	4473	3887	5309	19817	15896	14734	8668	10039	10125	7399	7812	7242	5466	4652	4450	3376
820.633	26666	20288	15587	25240	17694	11814	16017	12757	10263	6606	9383	5938	8156	5809	3857	5561	6167	5099	14006	13627	15613	10516	10323	9663	8329	6224	11178	4893	3918	6124	4983	6499	3712	5546	3147	3086	19759	15230	15411	8670	12440	10028	8218	7730	7373	5138	4965	4358	3618
822.633	25819	20045	16219	21707	19041	11730	14988	14102	9412	7940	9574	6041	6387	5824	4794	7012	5623	4829	14161	13883	15128	10670	8888	11127	7951	5853	7338	4980	4046	5527	5379	4488	4379	7491	4889	5251	18771	13564	13495	8100	12614	9909	8078	6985	7300	4760	4782	4354	3429
824.633	28708	18944	16727	25864	18383	15031	16814	13830	9076	7047	9789	6615	7978	5287	4980	5446	4892	5361	14315	12191	15780	10355	8198	10524	6720	6260	7601	4333	4053	6000	5616	3532	3558	5025	3245	3066	19836	12457	13196	9006	13210	8981	7901	7732	7233	5646	4642	4512	2989
826.633	27810	21273	17819	27189	17860	13579	15730	13725	9079	6688	8156	5728	7657	5816	5540	6569	5843	6177	13171	11852	16556	8681	9994	10030	8616	5485	6583	4879	3881	6194	5199	3860	4038	4138	3279	3869	18796	14043	15319	8412	12107	10037	8123	8011	6542	5155	4399	4773	3702
828.633	28226	16928	15120	21835	17387	12137	16140	13745	8263	7981	8193	6091	7939	6000	4528	6742	5616	5535	12772	10344	13109	9816	9494	7595	7539	8642	9758	6353	5192	5669	5922	3422	5417	8628	2655	4591	20049	15766	16310	7835	12271	10303	8621	6941	6998	5038	4791	4508	3586
830.633	24293	21197	16372	26766	17037	11683	14221	13769	10750	7622	9690	5834	8027	5658	4810	7000	5658	3681	13377	13503	12580	10659	8377	9431	6592	6680	7158	5088	6964	8103	5538	4600	3660	6936	4830	2901	15474	15486	15754	8426	12618	8952	8044	7131	6763	4869	4757	4393	3579
832.633	25924	19948	13156	24048	16106	11682	14405	14328	9101	8036	9627	5683	8001	5819	5469	6169	6156	5403	12840	12297	14740	10087	9776	10341	8281	7154	8194	5732	3909	6423	4879	4444	4130	5357	4012	3855	18988	9472	12959	9513	12746	9411	8051	7434	7160	4735	5117	4251	3600
834.633	28292	21071	14926	22287	17321	11619	16505	11575	10658	7813	9811	5944	8131	5509	4486	7015	4283	4541	14068	13848	12449	10187	9666	10113	7646	4952	9048	5699	4113	5597	5873	4704	3995	6051	3390	4629	19134	16343	16009	7273	10934	9240	8389	7307	7270	5039	4796	4723	3786
836.633	27544	18993	16966	24208	18689	12438	15893	14747	9839	6000	9980	6966	6651	6057	5686	6430	6244	5940	14265	12909	15463	10167	9478	10139	6517	5888	8438	6019	3645	5734	4542	3531	3836	4668	5086	5304	20322	11297	16208	6759	12856	10120	7861	7623	7150	5595	5143	4385	3018
838.633	28812	20952	16790	29424	17904	13322	14838	14067	10409	8276	9945	6868	6725	5800	4998	6575	5243	6161	13462	13664	15808	10360	8786	10675	7723	9564	8788	6707	5211	5476	4906	5985	6255	5927	5028	4384	19942	11388	13314	8813	12595	10271	8360	7765	6595	5501	4946	4883	3617
840.633	26003	21981	16245	21716	19133	14860	16054	13074	8922	8138	8898	5807	8300	5637	4929	6818	6007	5821	14101	13817	12884	10264	8889	10770	9123	7192	6978	6795	5814	5463	4754	5069	3730	3943	5072	5820	18773	16219	13437	8669	11626	10046	8303	8037	7006	5266	4880	4838	3192
842.633	25319	20766	15501	26428	17334	14713	16145	12778	9076	8070	9865	7010	8202	5310	5475	6766	6690	6349	11237	13386	15705	10241	9543	10680	6771	7159	6404	4869	6297	5499	6081	3383	3912	3937	4552	2761	18661	16323	15935	8606	13159	9981	8230	7931	7114	4993	4663	4888	3606
844.633	28072	18904	15992	23735	16361	11640	15656	13856	10684	8302	9145	6443	8146	6279	5622	6146	5043	5018	14118	13087	14727	10064	9719	10994	6566	6435	8694	5073	5465	6504	7272	3791	3186	4344	4494	4858	18116	11526	16026	7623	10976	10143	8043	7944	7159	5464	4564	4557	3887
846.633	28268	21660	17703	21694	18334	13874	13758	14069	9257	7525	9830	6372	7917	5224	4674	5559	6268	5864	13561	13210	12297	9913	8835	10678	7605	5818	7041	5187	7772	5987	4429	5268	4320	3805	3743	5228	19866	13449	16291	8783	12898	9361	8584	7538	7303	5021	4994	4636	3313
848.633	31167	19677	15635	23988	19248	12212	16707	12007	9634	7961	9554	6576	8395	5604	5266	7051	4964	4982	13926	13264	13056	10133	10903	10901	7578	6859	7411	5712	5165	5308	6174	3924	5241	6083	4139	4475	19879	16574	15799	6424	11676	9650	6917	7929	7009	4744	4965	4611	3320
850.633	26890	17609	17084	23466	19477	11959	15982	14122	9612	7692	9867	6825	8422	5649	4856	5878	6151	5809	13085	10926	15397	9719	9506	10747	6607	6533	7080	5354	3450	6080	4175	4487	3829	7635	2813	2499	19951	9355	14499	8954	13140	10298	8424	8115	7251	4987	4829	4614	3410
852.633	27947	17650	14958	27617	19630	14663	15528	11996	10564	6566	9319	6809	8137	6655	5434	6199	6129	6146	13960	12688	15164	9886	8939	10881	8449	6742	7344	4886	3292	6289	5798	4649	3665	4169	4472	2681	20571	12784	14078	8669	13124	8923	8375	7669	7134	5395	4308	4864	3870
854.633	27863	20430	15647	23874	17976	12299	16483	13811	8381	7272	7972	6574	7089	6058	5317	7402	6135	5522	14288	13152	14053	9946	9781	11153	7699	6437	7799	4455	7337	8552	5396	3961	5568	4547	3484	3231	18890	15855	16535	9697	12559	10036	7971	6813	7309	5020	5017	4666	3166
856.633	29111	19128	15375	29011	18408	14218	16129	14177	8818	7969	7310	6259	8633	5478	4887	6608	6376	4908	11119	13149	13097	7440	8291	9523	7640	6842	6842	6094	7868	5627	4098	4212	4567	3764	4167	2856	17299	15201	15531	8154	13107	10015	8277	7846	7192	5574	5147	4359	3573
858.633	31556	19720	14059	27098	18617	15929	15466	10876	9996	6828	9180	6963	8208	5562	5477	5887	6293	5709	12976	14487	12686	10389	9086	11355	8949	7061	7268	4577	7601	6581	6633	3035	4182	4093	4534	3164	19445	13557	14617	7952	12838	9802	7961	7423	7155	4897	5005	4556	3437
860.633	29709	21291	13364	22761	17190	14358	15925	12270	9759	8277	9823	7167	8167	6511	5470	7037	4773	6110	14499	10139	12701	9934	9679	10394	8430	8246	9624	5225	4300	6675	5422	4336	4636	5861	2779	4222	16852	13885	16386	8302	13178	10434	8187	7820	7148	5195	5047	4453	4019
862.633	27623	18642	14600	26719	19378	14204	14815	14840	10685	7074	10379	6985	8146	5457	5534	7319	4777	5707	14766	14166	13860	10090	10162	10601	8397	9333	8307	5144	4375	5523	4865	3729	3787	5643	4149	3323	19506	14672	15398	7813	12925	10335	8504	8217	7282	5274	5065	4630	3952
864.633	27192	18525	16000	25640	18204	11595	17229	12984	9109	7584	9582	6911	7734	5029	5682	5392	6293	6112	12477	11740	13862	10671	10088	10666	8818	5565	9509	4977	3855	5418	5452	5688	3952	7634	4306	4691	20156	15818	14757	8889	13030	10179	8553	7336	6948	5369	5193	4675	3709
866.633	28301	19406	16313	23038	19969	13024	14734	12430	8876	8533	9809	6834	8619	6137	5789	7752	6145	4099	13654	11075	15227	10286	9796	10555	8461	4566	7920	5436	3859	5902	7994	4788	4846	7216	4751	4731	17260	13550	15835	9638	12690	10358	8267	8209	7316	5457	4953	4772	3331
868.633	29066	22020	17173	26148	17827	15914	16451	13016	9805	8482	10004	7123	7961	6166	4915	7498	6226	6232	14529	13475	13778	9991	10075	11120	8098	8401	8705	5974	5580	4676	5105	5827	8448	6702	2744	3660	20333	14149	15367	8944	13032	10402	8261	7926	7207	5364	5057	4363	3311
870.633	28226	16500	17113	25350	17884	12049	16193	13804	9881	8262	9499	5769	8504	5982	5831	6065	6572	6173	14786	12980	13543	10104	9018	10549	6579	10032	7056	5035	5223	5617	4598	4500	3846	6774	4451	5235	15836	14386	14965	8823	12455	9056	8164	7806	7288	5684	5137	4867	3968
872.633	27177	19159	15399	23172	19349	15393	14030	12335	9913	7953	10012	6356	7107	6233	4821	7848	4574	5884	12981	12790	13824	9746	9760	10599	7433	9997	7314	5563	4279	5690	7120	4723	4067	5021	4829	4267	19780	11980	12715	8975	13030	10635	8556	7310	7703	5529	4451	5037	3421
874.633	29205	22383	18715	26818	19321	14666	15926	14511	9123	6763	9893	6654	8551	6157	5693	6346	5802	6357	13172	14190	13434	9608	9066	10883	6600	6266	10416	5829	5222	5317	7232	4140	4020	5036	3914	4591	16007	14520	15807	8256	12257	10073	6639	7213	7530	5570	5107	4504	3896
876.633	27150	21923	17047	27993	17062	13284	15970	13973	10524	8573	9474	6460	8534	6038	5706	6079	5806	4276	13879	13132	15129	9391	9419	10367	9168	6956	9443	5222	4883	7728	5387	3226	4255	7843	4741	5206	20121	15379	16140	9563	12727	10276	8612	7326	7338	5447	5219	4211	3580
878.633	25834	18953	16134	25176	18500	12925	14073	15175	9860	7543	7852	6987	7635	6378	5416	7231	6537	6439	14332	13912	15386	10482	9347	10687	8144	8957	6814	5240	3908	5868	7327	3099	6807	7442	4832	4265	19924	13484	15345	6496	12971	9709	7631	8110	7492	5634	5177	4835	3742
880.633	25152	21935	16571	25498	17052	12807	15013	11668	10791	7203	9947	7868	8574	6171	5764	7263	6817	6462	14035	11682	13315	10157	10668	10837	8827	6430	9145	5377	4079	5261	6357	3921	4982	4416	2730	3690	20367	15309	15816	8834	13120	10416	8325	7736	7387	5629	5237	4745	3349
882.633	29356	21638	15267	29574	19738	12012	14025	9642	9631	8384	10058	6648	8784	6264	5274	7573	6858	6919	13886	10820	14977	10426	10176	10802	7994	5711	7791	5106	4226	5289	6069	3766	4560	7176	2329	5314	16775	15233	16167	8796	13211	10594	8456	7448	7458	5715	5320	4898	4026
884.633	28286	20982	15874	24115	18365	14136	16869	12650	11882	8798	9095	6374	7793	6008	5035	7120	4814	5890	13330	13559	12273	10054	9238	9778	8494	6108	6981	4716	5365	8669	6977	3830	6228	8104	2520	2997	16714	13999	13608	9702	12826	10563	8351	7580	7053	5650	5337	4826	4228
886.633	27589	19060	17237	29373	19507	13332	15567	14751	8202	8871	9005	7090	8535	5963	5382	6984	4799	5987	14065	13343	14059	9820	9968	11198	7771	5469	7442	5520	3771	5624	6472	3327	3684	4014	5011	3378	18815	16742	16241	8927	12402	10691	8543	8126	7519	4989	5314	5015	3445
888.633	30291	20683	16413	25498	17288	11787	16474	11973	12034	7132	7188	7463	7352	6978	5980	7375	5166	6387	12704	13220	13884	10073	10373	10646	8701	6595	8805	5174	4624	7546	4063	3295	4287	7508	3701	4704	20361	15920	16101	8711	12381	8748	8501	8471	7686	5283	4981	4540	3849
890.633	28177	22080	15713	27360	16557	13280	15084	13988	9104	6838	10476	6868	7195	6637	5378	7344	6446	5646	14604	13474	14091	9470	10247	11144	8858	4987	7627	5155	7281	5760	4797	4272	4177	4609	4408	5221	19878	15839	15956	9050	13057	10949	8043	7896	6710	5126	5026	5025	3874
892.633	26441	20015	14057	25354	16568	12721	15338	14341	10651	7831	9439	6802	8682	5544	5048	7225	6835	6148	14470	13755	13556	9534	10418	10837	9128	6855	6651	5428	7379	5657	6564	4879	5799	4850	4973	3719	20501	14788	15186	8442	12970	10874	8531	7319	7693	5912	5271	4809	4060
894.633	26946	21622	14644	26742	19323	14572	16168	15310	10481	8199	9935	6236	8507	5941	5473	5899	6783	6604	14574	13771	12716	9916	9888	11173	9008	7031	8843	6153	6579	5453	5686	3499	4199	6266	2847	3480	20395	14720	16163	8367	12829	10570	8326	8278	7118	5154	5083	4735	3533
896.633	27876	22240	15194	25454	18077	12758	14553	14509	10857	6985	10074	7281	8881	6307	6242	8079	6568	6096	13839	11965	15920	9338	9325	9894	8306	5582	8626	5269	5162	5414	4509	5726	5455	8539	3911	3263	18175	14816	15508	8335	13479	9898	8555	7600	7483	5298	5260	4834	3154
898.633	27789	22318	17079	23624	16712	14387	15103	12316	8359	8980	9752	7302	7096	7217	4998	6298	6549	6518	13466	12506	12383	9732	9486	10161	7550	7382	5914	6244	7563	6427	4408	3543	4135	7586	2844	3165	19844	14745	16890	7219	11693	10564	8732	7275	7640	5501	5083	5289	4039
900.633	27185	20185	16506	28718	19840	11537	15803	14446	9095	8918	10340	6669	7167	5619	5948	7032	5359	6353	14616	13959	12857	10360	10155	11062	8087	6744	9365	4915	4399	6728	5822	3109	4365	7677	3247	5394	19646	13145	13270	9029	13108	10770	8723	7988	7485	5268	4811	4919	3422
902.633	26638	21821	17103	29797	18508	14387	15501	13887	9540	8310	9758	6773	7192	6097	5198	7261	6832	6797	14346	12996	13519	10097	10124	11381	9138	7354	8888	7311	5246	6319	7184	3953	3806	5361	4686	3379	20182	15798	16533	9690	13381	9232	8570	7940	7648	5399	5456	5450	4339
904.633	27649	18974	15238	28762	17272	14523	15782	14683	8821	8950	9796	6596	8732	5378	5804	6356	6515	4346	14206	13906	15996	10466	10909	11240	8279	6195	9968	5446	7531	4276	5384	3980	4131	4738	4840	4907	19792	8463	14517	7766	13572	9638	8300	7267	7686	5142	4767	4616	4097
906.633	29555	21845	16776	30355	16258	14266	15259	10710	11091	9043	8132	6568	9117	6103	6354	7027	7074	6802	11300	12448	15459	9674	9900	11323	8252	6338	7574	5426	6998	5512	6205	3784	4060	5232	4937	3670	20243	15475	14694	8703	11744	10377	8836	8426	7545	5396	5374	4935	3240
908.633	28439	22438	15360	29829	17916	15941	15377	14985	10481	8616	10199	6243	9150	6209	6298	6454	5005	6500	13025	14150	15729	10372	10524	10117	8806	5410	4995	5102	7861	6220	7014	3285	4055	7611	3633	4622	20037	16101	16275	8768	13490	10926	8545	8204	7288	6084	5205	5111	4091
910.633	30317	22387	14234	25832	16736	13052	17125	10874	10481	8071	10020	6392	7114	6414	5662	7842	5777	6133	14982	13226	13453	9783	10481	11319	8882	6353	9985	5859	3985	6232	4944	3191	4226	5005	3592	4819	14704	15931	14898	9208	12860	10655	7999	8138	7742	5478	5358	5087	4164
912.633	28395	22244	17101	28258	18613	14886	15098	14162	11320	8692	10101	6952	7488	6657	5934	8081	5032	6831	14818	12938	14939	10398	8948	9628	8712	6402	8408	5197	8028	6068	5325	4182	4381	5128	3857	5231	19205	13414	16470	8492	13420	10706	8736	8254	7708	5621	5327	5450	4062
914.633	27775	21676	15164	29956	15722	14985	14619	13939	9807	8747	8775	6577	8754	7166	6460	6163	6342	6342	15523	14118	13035	10115	10357	11049	8471	7064	10472	5164	6890	5987	6658	4056	4017	5584	3733	3916	20403	16046	15255	8408	12704	10642	8973	8490	7344	5257	5108	5268	3320
916.633	30305	19741	16820	27628	18815	15031	16287	14680	9936	7180	9782	7674	8697	6164	5990	7605	6239	6626	13839	13914	14867	10175	10747	10740	8335	10063	6961	6185	7566	5621	4824	7167	4089	4711	4795	4272	20289	17009	16063	9064	12399	9499	8675	8418	7587	5684	5433	5237	3758
918.633	27571	19142	17652	23983	17983	15237	14453	15558	10099	8933	10052	7145	7958	7176	5827	7394	6612	5334	14843	14600	13469	10275	9450	10139	8967	6876	8390	5400	4114	4305	6200	4554	4496	4642	4513	5310	20330	15394	12814	8445	12387	9377	8708	7405	7724	5407	5491	5230	4010
920.633	28110	22180	15797	29206	18172	14918	17036	14937	10282	8892	10127	7593	8127	5882	5255	6351	6364	6581	14316	10372	15941	10410	9263	10969	8238	6671	9185	5252	7473	6179	5434	4404	3961	4527	3590	4960	20359	16313	13219	10113	13277	10760	8402	7971	7644	5275	4710	5109	3898
922.633	25005	21159	15777	30452	16334	14060	16720	15079	11798	8367	8194	7578	8519	5806	5964	7231	7187	6151	14150	14449	15386	9983	9137	10821	8313	6156	9679	5110	7003	5622	6893	3958	4821	5933	3404	4784	20284	15827	15882	7507	11979	10841	8813	8228	7668	5987	5522	4519	3466
924.633	29831	21456	14358	29904	17906	13232	17264	14765	9343	6962	8401	7167	7927	6470	6099	7583	6959	5732	13406	12832	15575	10363	10604	11068	8678	6651	5504	6472	7541	5609	5491	3023	3945	5146	2871	4158	20482	14812	15213	9331	13627	10196	8947	8119	7681	5391	5533	4776	3282
926.633	29344	17423	15588	25388	17947	12973	15780	11778	10118	8737	10022	7143	8570	6863	5769	7638	6036	6454	14272	14046	13496	8549	9828	10142	8261	7013	7672	4908	7433	7948	5314	5114	4440	5427	3383	4294	19650	16183	16948	10068	13277	11097	8507	8073	7260	5823	5484	5563	3289
928.633	30406	22044	18574	25568	16884	14048	14939	14606	9649	8725	9636	6640	8323	6306	6058	8318	4602	6732	14248	13871	14193	10627	10301	9269	9074	5738	7864	5568	4041	8028	5616	3741	4316	6268	4100	4410	20298	16223	13553	8070	13177	9800	8788	8161	7713	6093	5076	4308	4230
930.633	29155	21496	17640	30593	17913	12683	15541	14692	11112	7166	10802	7960	8902	6205	5899	7281	6573	6174	15008	13632	13431	10365	9344	11182	10201	10275	8614	6347	5416	5558	4437	2988	4501	6394	4023	4628	20365	15012	16903	10033	13128	10498	8149	8565	7929	5535	5437	4839	3596
932.633	28138	21040	14028	30223	17326	14474	18010	12316	10454	8303	9922	6864	9210	5925	5391	7536	6626	6261	10942	14123	14385	9929	10078	9157	9023	8729	9519	5492	6067	7542	5654	4244	4566	7299	4755	3488	20482	12913	16911	8146	13323	10855	9014	7979	7788	5284	5408	4984	3371
934.633	24586	21580	15744	29371	15972	13369	16046	14604	11227	9313	10640	7120	8830	7308	6344	7574	7500	6762	11976	12182	15160	10273	9713	10303	9001	7067	9790	5542	4100	5888	6048	4845	4189	4529	3727	5663	20435	14988	14813	8588	10653	11088	9031	8309	7496	5406	4909	4807	3602
936.633	28897	18269	16242	24567	19688	16020	15041	15302	7815	7730	10783	7436	8836	6476	5333	6624	7056	6589	14733	12916	14948	10492	9572	11196	7110	7603	10985	6235	4073	5563	4940	3864	6557	5945	4732	4318	20252	16181	15458	9163	10487	9851	8795	8536	7196	6043	5352	5604	4341
938.633	29797	19495	16307	27762	18971	12722	15519	10158	8619	8603	8771	6762	8928	6536	6416	8797	6628	5553	14211	12976	14872	9937	9829	9249	9234	6716	10385	5078	4944	5813	4873	6206	4195	5622	2658	4061	19520	16356	12994	8850	13334	9614	8774	8345	7571	5625	5715	4990	3610
940.633	29509	19397	13835	27542	18503	14671	16884	14984	10452	8785	10280	6927	9125	6443	6044	7219	5786	5320	12481	14821	13253	9677	9093	10782	7351	5875	7390	4453	4237	5658	6153	3510	4113	6277	2952	4694	17439	15155	16685	9506	13412	8828	8232	8382	7932	5410	5208	4939	3633
942.633	28696	21647	16387	27651	18499	13073	17702	14642	10828	7779	10615	6926	9111	6860	6336	7523	6986	6943	13326	14232	14298	9925	10625	9953	8496	9123	7972	4942	6148	7552	5676	3338	5517	6027	2570	3092	20330	14123	16434	9613	12784	8270	8703	8517	7860	5270	5253	4933	3913
944.633	26894	20623	16792	26103	19333	14863	15805	12288	9508	8514	10768	7114	9429	7194	5749	7378	6835	6432	14098	13834	14405	10578	10548	10238	7947	6744	8668	4612	7173	5761	5966	6153	6188	7787	3621	5041	20446	16339	16419	8418	13367	8070	8950	8415	7814	6034	5390	5741	4521
946.633	29146	22204	15259	23517	18434	12787	14691	11239	8544	7813	10706	7445	9220	6126	5884	6273	6810	6971	14298	13255	15260	7258	10032	11153	7834	6367	7732	5066	7442	5924	4503	3809	4225	8163	4664	4669	20475	13243	16306	9245	13396	10988	8864	8282	7834	5604	4603	4824	4204
948.633	25872	21798	15185	30016	17037	12578	15991	14797	10268	8874	9245	7031	8814	6866	6022	8564	6610	4325	13933	12444	13756	10358	8856	10933	7436	6587	8563	4368	4432	7681	5710	3494	6513	4963	3563	2913	16645	15209	15505	8201	13462	9819	8687	8623	7869	5443	5684	5023	4487
950.633	28789	20888	16689	26957	17878	15080	17267	15298	10445	7980	10476	7788	9331	6931	6299	8284	5999	6921	14674	13146	16875	10528	10553	11217	6702	6429	9673	5893	3941	5562	5933	4077	4724	5996	2737	4258	17891	14430	16693	8690	13412	10912	8412	8760	7923	6248	5589	4783	3813
952.633	26048	22085	15369	25314	18772	14038	16551	14737	8948	9142	8623	8053	9133	6384	5841	8797	7222	6204	14654	12451	13658	11023	9712	10479	9050	6614	9867	4613	6437	5700	5321	2806	4722	7611	4566	3260	19450	16354	14729	7672	12717	10998	8251	8609	7270	5512	5527	5029	4215
954.633	29614	19103	18897	25787	18052	13812	15425	9099	12753	7575	10134	6871	8936	6706	5756	6405	6877	7059	14609	14381	14266	10461	9175	10027	7504	6562	7013	5561	4592	5848	6406	3557	4858	6244	4929	2795	20520	17155	15217	9570	12962	9451	8941	7978	7878	5693	5429	4755	4068
956.633	28849	18783	13908	27946	20204	14941	16772	15030	11874	8047	10079	6790	9574	6951	5599	8131	6808	6624	14671	14202	13000	10192	9437	10491	9065	6294	6940	4671	6829	5626	4718	3641	4988	5740	4299	5041	17229	16264	17184	9584	13114	10589	8856	7362	7914	5571	5637	5034	3726
958.633	29958	21571	16119	25143	18847	14357	17327	11076	10619	8201	10373	7807	9148	7378	6570	7935	6696	6519	11734	14212	14824	10586	9251	11006	8973	6402	10543	5182	6956	5746	5106	4381	4658	8065	4911	3926	19362	15346	14593	9453	13387	10487	8762	8170	8056	6063	5520	5505	4205
960.633	29317	17994	16762	28258	18659	14136	17060	15164	11835	6974	9617	6907	8098	7196	5010	8495	7213	6598	13273	12771	15820	10183	9526	10469	6670	6871	9049	4488	3751	8716	4939	3155	4298	7353	4065	4640	18588	17772	16202	8643	13000	11192	9003	8457	7847	5912	5420	4845	4378
962.633	29127	18639	17538	24710	17470	14620	16968	14837	12340	7195	11058	8141	7891	6821	5513	8554	6766	6553	14758	12674	15267	10270	9281	10602	8060	5668	9362	6441	3762	9458	6205	2765	6730	4984	3310	3784	20413	12711	16553	9576	13267	11080	9013	8398	7509	6307	5409	4962	4412
964.633	28087	20167	17163	28619	18274	15868	16329	12966	9344	9316	9839	7913	7719	7191	6247	8940	7392	6760	14730	13496	13324	10466	9033	11473	9713	5835	9690	6087	7716	5931	6081	4137	6469	4737	4591	3527	19343	16307	15933	7403	13603	11036	9061	8361	7804	6322	5190	5683	3839
966.633	28718	21852	16913	28004	18234	14443	16580	12840	11487	9018	10299	7051	9332	5954	5730	8215	6181	5190	14377	14459	15016	10417	9443	10532	8541	6751	8321	4658	7357	5801	5365	3074	4429	6128	4270	3409	18613	11880	12920	6648	13437	11046	8888	8505	7176	6163	4768	4445	3805
968.633	28639	18425	16629	30357	17952	13085	16327	15139	11937	7655	10805	7492	8920	6900	6106	6953	6730	6207	14676	13638	14134	10190	10581	10959	8860	6884	8140	5309	4746	6055	5733	3113	4420	4848	2848	4338	19574	14896	14463	8072	13918	10892	8800	8385	7781	5259	5698	5321	3460
970.633	31921	22050	16777	27699	19614	12870	17804	15112	10650	9162	10805	7041	9231	6620	6680	7701	5135	5823	14754	14558	13466	9069	9167	9744	7673	9203	7715	5890	4190	6828	5580	4531	4626	4588	4950	5314	20785	15286	15686	8703	13890	11161	8588	7884	7860	5457	5713	4894	3494
972.633	31253	21270	16938	27910	18015	15432	15135	11292	11485	8792	9762	8346	8255	6769	5448	7837	5940	6236	13435	14935	12849	10420	10762	11162	9364	7017	7571	4824	5729	5932	6981	3208	5705	5830	4872	4921	19045	16587	16646	9578	13488	10933	7458	7039	8167	5515	5721	5663	3361
974.633	29539	22412	17134	23987	19732	12607	15835	15765	9559	7496	11098	8174	8856	6796	6825	8230	7134	7102	14695	14864	13586	7020	9775	7926	7128	7169	9851	5528	4179	5492	4799	3782	5666	7715	4491	4551	20423	13602	15862	9118	12985	11157	8526	8623	8080	6106	5298	5001	4282
976.633	30755	19241	15789	28157	19072	13369	16078	12265	9062	8159	10704	8004	9178	6079	5560	8000	6645	5968	14072	14319	15590	10415	8928	11156	9895	6468	4601	6555	6320	6931	5207	4793	4581	4759	4038	4662	21020	16051	16833	8150	13380	11242	7716	8332	7853	6296	5355	4186	4042
978.633	30150	17839	16184	27470	18196	12493	17351	10158	10048	9557	10264	7930	9516	6961	5916	8608	6652	7279	13471	14621	15481	10419	9843	10680	8833	9245	6816	5703	6752	5644	4482	4300	4612	6448	4278	5043	20618	14022	15441	8396	13251	11075	8504	8059	8007	5636	5825	5285	4823
980.633	28448	21727	17459	26457	19961	12385	15781	14320	11800	7218	10267	8386	8815	6020	6475	7534	4976	5743	12181	14082	13445	10372	9988	10507	7181	7098	10519	6108	6367	5373	4949	3295	5031	5917	2938	5581	20798	14082	16562	9067	13630	10290	8969	8377	7310	6382	5761	5179	3883
982.633	28513	21863	16910	25699	16380	14574	18241	13540	11996	7751	10510	7811	9405	7045	6703	8524	7275	7326	14495	14115	16134	10370	9495	11098	8561	5196	9240	6844	6676	6070	5935	2905	4793	5529	3776	4643	17076	15352	15171	8423	13509	11107	9029	8534	8081	5868	5670	4951	3969
984.633	26223	22303	17016	28145	20002	15449	16754	15133	10982	6913	10700	8250	9543	6776	5595	8076	5624	6261	14492	13273	14717	9755	9740	10886	9138	5732	6855	5045	5591	8789	5730	3055	4548	7526	5027	5211	20605	15507	16545	9447	13882	11030	8818	8117	7822	5875	5571	5192	4654
986.633	28532	22166	14468	27266	18093	14075	17501	14001	12309	9091	10624	7084	9495	6740	6027	7817	6970	6856	12531	13872	15013	10702	10033	10814	9065	6293	10090	5283	4307	7529	5690	4069	4979	7314	3623	4580	20452	14384	16509	9803	11038	11077	8874	8312	8058	5709	5649	5322	3886
988.633	27526	20518	15535	25522	17775	14495	16836	12184	12021	7610	10732	8570	9737	5944	6311	7234	4669	7639	14163	14540	15709	10397	9534	10150	6672	9914	5040	6374	7162	5895	4304	3896	4611	5898	4666	4398	20896	15569	14861	8611	13667	11124	8963	8179	8024	5652	5923	5223	4502
990.633	24041	21403	16668	27853	18989	14144	16473	14925	12228	9413	10204	7547	9876	6247	5780	8978	6211	6949	14142	11794	14565	9440	10261	10891	9053	5337	8037	5459	4635	5873	5055	4590	4503	6772	4112	3711	20846	15459	15329	9748	14051	10267	8771	8914	6980	6243	5946	5865	4373
992.633	27250	20484	12549	27350	16564	14307	18102	9699	10481	7671	11045	6498	8960	6123	5764	8478	6631	7119	12718	12501	13346	10919	9531	11028	7610	6952	8316	5023	5639	5883	6555	3558	4690	5905	4785	4618	20965	16815	16419	9276	12774	11448	9088	9027	7564	6262	5789	5018	4396
994.633	26100	22146	15832	25950	18689	14757	16215	12325	11326	6782	10834	7510	9638	6527	6111	8795	7164	6582	13611	12875	14708	10391	10920	10570	7395	6286	6834	5066	4499	5770	4955	3138	4777	7799	3409	4155	20318	17328	16742	7294	14013	11347	8995	8404	7859	5741	5763	5545	4142
996.633	30574	22455	17082	25112	17927	13949	18209	12692	9266	7704	10669	8393	9330	7134	6835	7393	6704	6910	14589	11770	15476	10319	10781	9102	8386	7678	9069	5482	5209	5825	5752	4796	4869	8070	3149	5390	20698	13318	17080	9562	14171	10955	9148	7677	7991	6001	5738	5697	4483
998.633	26580	20638	17386	28527	19179	14064	15922	11442	10559	9201	9591	8269	9448	7042	7055	7662	6373	7508	12134	14440	14819	10404	9842	7169	7107	8675	7793	6215	3970	6136	6511	5042	5121	5232	4487	3459	17898	12158	14089	7283	13292	11478	8808	8644	7929	5479	5466	5423	3702
1000.63	27515	16188	15025	24538	18173	12177	16624	13547	9589	8048	11069	7367	8457	7229	6655	8588	7207	6356	14406	13986	15085	10309	10611	9558	9037	7664	7698	4943	6135	6155	4643	2629	6534	7147	4638	5034	20335	12840	15067	7981	13651	11159	9008	8193	7608	6487	5573	5827	4564
1002.63	29064	21334	17554	31424	20936	14506	15792	15702	9143	9849	9394	8279	9315	6891	6551	9113	5285	7253	14851	13253	15599	9581	9810	11285	9166	7775	8368	5417	5828	6243	4310	3948	4944	6144	3174	4410	18821	15057	14926	8460	12899	10901	9054	8631	8114	6129	5771	5176	3887
1004.63	28913	21285	17274	28486	18250	14827	15190	14923	12324	9329	11008	6618	9889	6805	6804	8511	5138	7319	14752	13530	14071	10704	9594	11255	7422	5219	6697	5385	4921	5682	5558	3350	4930	5817	4850	3889	19499	15816	17130	9131	13812	10933	9199	8639	8025	5875	6011	5229	3795
1006.63	26376	22440	17277	27639	19863	15242	16354	14422	12380	8907	10439	7386	8605	6374	5659	7931	7438	6019	11984	11488	13438	10364	10977	10846	7996	6562	8293	5447	4129	6415	6052	3893	6609	5662	4180	4322	20515	14978	14113	6734	13398	11504	9203	8289	7877	6181	5620	5408	4404
1008.63	30152	22236	17512	28741	19160	12539	15810	15178	9798	7878	10044	7602	9422	7359	6702	8977	7781	5405	13846	14167	15417	10534	9852	10476	8551	7551	9752	4619	5768	5695	5159	3545	4754	6385	3377	3258	17288	15299	13672	7055	13197	11105	8009	8798	7987	5547	5885	5377	4132
1010.63	30638	21715	17389	25392	20396	15052	17578	16016	11371	7121	10859	7385	9484	6134	4882	8985	7465	6971	14007	13920	14161	7265	8769	10196	9282	6632	9165	4943	5768	5636	4546	3461	4497	5083	5179	4732	19202	11275	17005	8394	13371	11074	8980	8263	7875	5717	5661	5079	3981
1012.63	29467	21336	16527	29643	19358	14689	17784	12870	10828	8107	11245	7570	8149	7401	6286	8256	7059	6289	14885	11968	13966	10616	10614	9659	9322	6061	9731	4891	4892	10792	6667	3706	5077	5069	2823	4629	19179	11800	14186	8185	12874	10434	9078	8949	8029	6385	5796	5672	4833
1014.63	27764	21612	16731	30451	18047	14971	17678	15348	10473	8313	9898	7410	9225	7196	5450	8456	5930	7844	15145	14216	15313	9872	11727	11129	9911	6084	10403	5472	4996	6454	7547	4997	5534	6260	4618	5222	20700	15137	17249	7968	13373	11338	8919	7766	8149	5870	5628	5770	4504
1016.63	28809	19518	16701	27411	17024	12930	18117	14442	12172	7815	10604	7438	9905	6921	6710	8356	5449	7134	14414	14824	13422	10897	11707	10273	9453	6232	10308	4450	7565	9022	6216	4402	4844	7944	4862	4165	21116	15924	13412	8768	13525	10163	9460	8312	8047	6436	5825	6398	4052
1018.63	28619	15460	13809	28313	18200	14130	16851	16170	11683	9080	11124	7592	10067	7150	6269	8481	5717	5865	14715	13437	16467	10735	10131	10870	7398	10128	6775	5296	7068	6021	5398	4107	4654	7288	3709	4069	20851	15197	17216	9768	13003	11409	8730	8426	8027	5608	5563	5040	4779
1020.63	26370	20227	17207	28791	20496	17321	17726	14729	12316	9196	11407	7684	9615	6103	6653	6954	7824	7101	14135	12747	12899	10602	8946	8311	7126	5978	9399	6510	4740	7052	6610	3377	5639	6146	5023	3878	18859	14648	14836	8626	12544	10751	9059	8731	7772	5425	5944	5346	3814
1022.63	26085	22029	17018	25442	18575	14787	18273	14488	11356	7450	10483	8121	10120	7205	6293	8261	7350	7102	12910	14263	14437	8511	9927	8775	7903	6438	8031	6490	5372	11321	5260	4837	5134	7373	4851	4717	15956	12415	13817	8649	12703	11124	8968	8139	8019	6142	5732	5395	4630
1024.63	28985	20505	14404	31407	20077	16898	17273	12913	11618	7902	9617	8178	8423	7345	6875	8802	5380	5859	15112	12819	14341	10294	11209	9412	7899	6485	9586	5519	7624	5811	6316	4740	6353	5084	4257	4575	20866	16115	13139	8998	13546	11530	9044	8429	7478	6391	5685	5544	4377
1026.63	28605	22990	18237	29947	19096	14750	15401	15634	11536	7997	10861	7963	10216	7076	5806	8571	6007	6833	14528	13513	14638	10995	9456	10994	9479	5923	6817	4961	5386	5817	5501	3624	5259	6667	4125	3495	19965	16260	16044	9948	13968	11616	8881	8969	8014	5868	5773	4795	4552
1028.63	27282	19572	17420	25480	18552	13725	18203	15465	12843	8046	10888	7747	10083	6380	6873	7056	6859	7646	13415	13553	15537	9476	11737	10597	9189	6807	9041	4709	3924	5902	5371	3799	4860	7458	5124	5199	20192	14288	15693	9861	12192	11485	8777	8522	8376	5537	5439	5179	4814
1030.63	28887	21303	16420	30424	19553	16709	16924	14650	11958	9751	11118	7780	9953	7619	6605	9323	6935	7269	12757	13338	14944	10587	10130	10289	8651	6375	9727	5158	5122	6047	6774	3264	5303	5593	4939	4551	18590	16702	15165	9455	14278	11251	8835	8628	8113	6000	5579	5111	4606
1032.63	29281	22379	18271	30642	18518	16492	15685	15530	11869	9098	9611	7934	10274	6889	5726	8813	7400	6840	10677	14363	16006	10716	11315	10887	8132	6121	6203	6356	6523	6004	5498	3614	4902	6710	4916	4961	20249	16299	17237	8714	12986	11321	8983	8570	8141	6507	5544	5232	3860
1034.63	28487	21033	13431	29184	19559	14513	18676	15222	12591	9378	10604	8428	9127	7185	5858	8214	7509	6579	14639	14774	16142	10599	8558	10814	8589	5415	8103	6203	5985	4943	5946	4495	4817	7246	4771	4181	20960	15690	14569	9095	14336	11097	8748	8873	8014	6046	5904	5990	4060
1036.63	28628	20499	14781	30231	19217	15355	17100	12773	9456	7989	8965	7835	9283	6826	6907	9513	7430	6997	12158	13838	15341	10489	10515	11076	7046	5443	9399	5599	4033	5621	5605	3302	4951	6514	4382	4062	20112	16209	14477	8346	13861	11059	8777	8819	8425	6645	5890	5783	3777
1038.63	29461	22170	17708	30055	18783	15064	16750	11175	11507	8545	10824	7074	9902	6692	5994	7771	6282	7480	14643	14505	13007	10468	11391	10750	8598	6250	7054	5355	4872	5768	6273	5409	4964	6026	4340	4999	21024	16426	16048	9312	12681	11207	9244	8302	8166	6013	5703	5753	4264
1040.63	29093	20732	17243	31777	19083	14325	15710	15470	12204	9207	10903	7940	10235	5867	5399	9086	6042	7608	14741	14410	17287	10249	11491	10790	8831	6132	8160	5121	5619	6309	5552	3097	6429	6349	4544	3455	20668	12749	13580	6583	13934	11123	9393	8911	7957	5942	5249	6188	4580
1042.63	25904	21030	15748	30446	19141	14917	16566	13560	11987	8863	11343	8724	10385	6904	5992	8096	6824	6724	14655	14029	16745	10545	9638	8704	8789	7620	6894	5246	4400	6937	6124	3196	5008	6293	4649	4182	20314	15992	17302	8267	13379	9838	9142	8784	8036	5491	5659	5551	4650
1044.63	28091	21795	15522	26195	19047	13039	18396	14010	10710	8581	10753	8131	9626	7013	6779	8494	7796	6480	15170	13901	15949	10814	8602	10506	7206	5347	6478	4648	5361	6030	6762	2785	5231	6384	4824	4749	20021	17241	15558	10162	13837	10923	8598	7916	8088	5973	5754	5429	4862
1046.63	26643	22456	17284	26556	18755	15536	15803	15490	9672	9994	11260	8482	9129	6832	6920	8326	5476	7222	15321	13917	12961	10668	10294	10872	7664	6812	6939	5492	5376	5772	5502	2953	5140	8219	3811	3910	19000	13166	15113	8407	12938	11436	9655	8650	7904	5584	5676	6086	4645
1048.63	32027	21724	15751	25942	20241	14976	18532	15337	11569	8842	10702	8726	10326	6856	6101	9585	7200	7625	14195	14320	14998	10784	10181	11311	8956	5321	6826	5296	7195	4766	5765	4390	5266	6548	4112	4688	19393	15161	15147	7518	13663	10719	8903	7860	7877	6664	6038	5100	3818
1050.63	30826	21770	14504	27009	18649	14220	15851	12672	12480	7142	10523	7797	9609	6748	5889	9512	8005	6175	15006	13905	15121	10583	9554	10857	8774	6320	6916	5136	6454	6385	6545	3294	5328	5895	3595	4472	18833	17438	17471	9819	13821	10985	8954	8726	8302	6415	5577	5395	4138
1052.63	27238	22060	15810	28704	18865	14164	16221	15808	12015	7779	10471	7689	9998	6834	6892	9236	7355	6104	13164	11471	14469	10313	8926	11163	8432	7130	10339	5422	4799	6476	6400	4693	4837	5579	3806	4223	20917	16222	16486	9523	14024	10864	9288	8995	7996	6283	5887	5904	3920
1054.63	29075	18326	16922	27319	18740	15356	16732	15923	12037	8031	10977	8024	8250	7130	6318	8553	7209	6484	15208	14630	14910	10464	9082	10089	9195	7026	8197	5007	5259	9832	5783	5124	5033	8151	5056	3994	20576	15266	13781	9627	12964	10935	8868	8976	7337	6314	5706	5522	4613
1056.63	30449	22474	14542	27595	19433	16215	16470	11967	11814	7634	9806	8552	10037	5942	6797	8345	5298	7377	14155	13418	15331	11030	12057	10749	7585	10353	8348	5953	4044	7766	5748	3456	5189	6024	4911	4481	20971	16866	16913	8790	10822	11016	9244	8624	8347	5973	5592	5650	4995
1058.63	27028	21557	16420	31574	18737	15583	18366	14385	12018	8073	9941	8486	10426	6423	6700	9314	7192	6821	14490	14370	16315	10927	10944	10989	8008	5415	10778	7248	4079	6543	6600	4611	5337	6973	4778	3740	20239	15520	16972	7462	13902	11372	9527	8213	7780	6689	5616	5682	4570
1060.63	30658	22009	18179	30944	18249	13490	16726	15589	10600	9438	11229	6973	10300	7382	6914	7686	5693	7416	14639	12783	14007	10385	8805	10907	7568	5806	7244	6886	7078	6035	4796	5696	5465	6312	5261	4944	20850	16596	15102	10093	13702	11205	9350	8678	8070	6160	5860	5218	4596
1062.63	23372	18107	15390	28209	17998	14853	19882	14973	11860	9922	8660	7595	9655	6753	6498	8978	7723	5334	14134	12169	15250	10525	11531	9731	9637	6080	9001	7087	6065	5968	5981	3237	5426	6339	5011	4954	18800	17403	17175	9831	13970	10617	8790	8733	8046	6369	5871	5430	4839
1064.63	29069	22202	14141	24420	20617	14290	16258	10784	10997	9461	11018	8061	9741	7654	5935	9546	6270	5872	14954	14425	13670	10475	9330	10774	7391	6890	8981	4765	4750	6308	5298	4534	5149	7080	3579	4209	20243	9045	17171	10222	13224	11442	9252	9003	8190	6151	5834	5253	4539
1066.63	29830	20468	16287	31347	20429	16293	17991	16784	11152	10173	10821	8228	10429	7164	6834	9223	4851	7322	14238	12606	13420	11168	9302	8363	9145	7496	9948	4802	4691	6626	5665	3779	6086	7299	3555	4769	17093	15851	16928	8943	10741	11251	8902	8854	7994	6258	5872	5116	4018
1068.63	29676	21156	17681	31044	18049	14454	18746	15678	11145	8374	11052	8565	10223	6380	5678	9563	7776	5616	15019	13794	15376	10212	10435	10761	8744	6891	9102	5428	6729	6128	5979	3309	5230	6635	3494	4691	15817	14998	15881	9534	13842	10456	9608	9143	7718	6472	6148	4819	4752
1070.63	30229	22541	14407	28827	17446	15025	16230	15366	12491	9895	11533	7314	10138	6846	7104	8897	7308	6234	14568	14390	14236	10599	10544	8858	9218	7612	7429	5633	7908	5841	5737	3700	5261	8311	4796	4677	17956	15962	14213	8798	12859	11333	9551	8870	7513	6190	5938	5195	4038
1072.63	29492	21862	17261	31188	20214	13228	15533	15176	12647	9622	10709	9073	10260	6295	6939	8805	7522	7045	14864	13983	15468	10508	10198	11061	8965	6115	8328	5674	5563	9025	6722	3553	5121	6512	4233	4073	20904	16871	16322	9278	12550	11311	8787	8830	8317	6536	5680	4674	4096
1074.63	28883	21596	17234	28531	19166	13262	17058	15366	9209	8938	11303	8384	10343	7138	7228	8701	7896	7416	11656	14930	14049	10876	8901	10686	8523	7013	8525	5854	5081	6057	4920	4255	5198	6319	4693	4779	18527	14999	16450	10282	13097	11240	8878	8386	7875	6720	5937	5758	4688
1076.63	27099	21425	15383	27944	19236	17226	18922	15299	12095	7715	11123	8863	10643	7714	6964	9804	6876	7115	14693	15121	15586	10735	9928	10315	7932	6921	7421	5114	4064	5934	7798	3592	5088	6451	4848	3956	16925	13693	17223	9721	13977	11411	9394	8234	8075	5738	5799	5853	4191
1078.63	27879	19289	19072	26761	20519	16594	15945	15249	12514	9558	11032	8805	9378	6587	7188	8399	7846	7185	11559	14215	13680	10728	9700	11378	9055	6753	5579	5081	5116	5869	6971	4165	5171	6344	3944	4105	17536	15009	14022	8239	14411	11680	9224	8946	8414	6054	5911	5645	4538
1080.63	30689	22664	17157	28438	20057	12071	17550	15079	11953	9568	10714	7956	8723	6206	6875	10064	7828	7317	14542	14262	15507	10315	7586	11107	8760	7877	9913	6599	4519	9894	7161	4923	5672	6508	4300	4643	20682	17459	17075	9004	13839	11648	8742	8682	8189	6319	6026	5537	4746
[truncated: 47 more columns]

## Sheet: plate3
Set Temperature	Setpoint 60°C
Excitation: 450/9.0, Emission: 482/9.0
Optics: Bottom, Gain: 85
	[Scutellarein]:[a-Syn]																		[Luteolin]:[a-Syn]																		[7,8,2'-trihydroxyflavone]:[a-Syn]
Time, min	0.25:1	0.25:1	0.25:1	0.5:1	0.5:1	0.5:1	0.75:1	0.75:1	0.75:1	1:1	1:1	1:1	1.25:1	1.25:1	1.25:1	1.5:1	1.5:1	1.5:1	0.25:1	0.25:1	0.25:1	0.5:1	0.5:1	0.5:1	0.75:1	0.75:1	0.75:1	1:1	1:1	1:1	1.25:1	1.25:1	1.25:1	1.5:1	1.5:1	1.5:1	0.25:1	0.25:1	0.25:1	0.5:1	0.5:1	0.5:1	0.75:1	0.75:1	0.75:1	1:1	1:1	1:1	1.25:1
0.63333	1399	1535	1550	917	809	778	612	645	625	386	521	397	476	455	601	448	401	483	1298	1258	1507	962	894	851	650	688	715	605	555	637	625	538	478	524	610	437	1875	1259	1306	824	1100	764	766	775	723	541	613	613	512
2.63333	1183	1435	1403	797	868	761	575	515	569	1193	430	395	510	407	469	481	351	433	1369	1263	1341	917	746	782	587	792	652	658	554	542	546	567	662	404	491	405	1567	1098	1101	742	963	781	684	664	756	681	568	425	350
4.63333	1207	1455	1312	902	1071	740	519	531	667	396	412	535	611	350	448	580	503	601	1463	1371	1329	848	828	746	578	554	581	672	490	482	452	694	549	382	593	348	1654	870	1032	745	895	860	874	900	765	664	659	402	388
6.63333	1049	1330	1105	883	880	893	727	477	679	466	472	499	800	472	474	584	274	609	1235	1142	1202	876	774	779	328	577	641	560	509	576	352	513	750	352	396	500	1488	878	800	776	622	854	635	743	588	536	674	227	319
8.63333	919	1189	1160	892	718	814	730	1156	741	445	574	528	608	603	565	628	363	548	1079	903	1076	834	720	739	607	584	513	561	580	395	496	491	667	548	577	312	1452	780	974	661	654	679	580	559	548	504	637	204	502
10.6333	916	1145	994	704	748	843	881	601	658	471	407	593	760	476	673	618	468	630	1102	1107	1058	739	765	685	571	540	686	576	341	706	489	653	307	337	387	573	1543	754	668	677	761	462	662	588	718	521	338	239	446
12.6333	873	1017	1305	668	814	707	667	711	633	400	564	515	684	505	626	736	267	600	1079	1230	1107	859	792	649	578	611	450	726	417	558	721	561	626	556	494	386	1353	780	666	591	843	749	439	750	555	463	720	356	475
14.6333	878	1032	1005	787	707	682	778	609	731	633	570	567	737	461	750	555	361	758	1138	995	983	865	693	685	520	616	511	702	536	579	636	522	603	443	566	440	1807	736	994	610	667	753	480	526	672	380	562	372	424
16.6333	756	1028	1045	722	941	792	795	617	643	660	724	575	764	338	594	570	425	937	971	1248	1022	942	727	767	510	657	471	674	561	696	501	484	393	434	497	312	1503	741	623	721	785	575	415	366	749	819	653	367	421
18.6333	862	1024	1108	813	698	820	713	624	642	372	647	525	868	289	655	720	628	714	1221	1139	1059	899	921	712	783	601	489	503	486	856	384	536	392	390	339	559	1554	760	933	657	778	518	541	409	740	395	633	213	503
20.6333	784	1074	1122	801	671	803	665	588	633	495	705	587	792	347	632	613	512	856	1102	1083	1184	857	1172	780	767	837	438	834	609	745	453	588	724	582	457	495	1549	919	931	750	757	678	740	513	757	546	785	257	403
22.6333	853	1030	813	614	635	670	848	717	526	569	572	561	1187	483	780	666	522	988	1317	1219	1172	913	1060	966	575	515	685	702	544	468	486	599	813	427	429	511	1407	907	662	564	748	701	517	749	743	557	614	113	514
24.6333	915	1091	938	683	802	932	680	545	903	650	475	531	1277	556	797	883	439	1183	1436	1223	1203	1052	1432	1149	739	662	487	778	665	642	527	679	911	750	353	501	1853	1185	894	615	670	645	540	583	636	546	799	333	526
26.6333	806	1373	779	761	585	999	878	623	706	1203	674	485	1393	512	936	674	385	1598	1473	1735	1220	1268	1356	990	749	854	511	1069	441	886	919	764	621	761	672	372	1424	1049	758	812	970	630	543	756	773	1065	655	368	637
28.6333	826	1521	884	942	718	954	709	750	850	1117	1135	482	1484	713	992	872	600	1468	1362	1886	1337	1249	1602	1309	917	585	593	1134	501	874	700	761	992	813	340	550	1544	1216	844	651	773	887	566	791	891	872	1221	241	582
30.6333	852	1857	1091	945	718	1294	981	840	945	772	988	629	1877	664	1158	1027	667	2061	1673	2088	1455	1112	1796	1651	1205	836	522	1183	428	1047	1317	979	882	1352	432	523	1411	1198	842	649	418	893	686	1076	915	908	1460	283	690
32.6333	947	1646	940	855	885	1965	930	723	1305	764	1485	749	2014	786	850	951	584	2409	1542	2285	1491	1373	1960	1769	932	1153	637	1699	794	1045	790	1179	791	1104	508	586	1538	1381	869	663	997	882	492	879	1356	753	1331	217	748
34.6333	837	2046	1313	822	665	1510	1108	1066	1276	698	1205	814	2268	954	1935	1031	752	2798	1487	2653	1770	1488	2590	1896	1000	742	536	1527	657	1826	948	1368	742	1097	660	435	1498	1281	1055	688	931	908	759	831	1488	1661	1411	359	905
36.6333	970	1972	1141	966	743	2179	839	1337	1161	1085	1347	926	2122	503	1054	1424	520	2365	2206	2310	1873	1504	2021	1797	1788	1399	499	1714	667	1961	1599	1650	913	1120	493	750	1779	1207	835	678	1179	959	748	1469	1456	1257	2277	326	947
38.6333	1048	2191	1592	962	645	1172	676	1491	1321	1149	1529	882	2026	794	1713	1483	767	2567	2505	2568	2108	1439	3371	1347	1566	1136	497	2088	928	2281	1656	1407	1543	1772	534	456	1455	1266	827	763	1315	1249	809	619	1837	2068	1765	369	859
40.6333	1082	2112	1511	1123	1041	1586	1224	1275	1346	1083	1375	892	1905	1237	1590	1735	918	2787	2086	2623	2187	1816	3451	1918	1100	1520	576	1558	1042	1454	1582	1722	1756	1603	437	676	1445	1357	972	662	1678	1000	883	1431	2080	669	2467	333	1066
42.6333	1154	2028	1427	935	792	2130	1349	947	1573	1331	1130	738	2032	1461	1844	1281	725	2921	1723	2476	2355	1536	3834	2058	1073	1001	639	2005	998	2312	1547	2075	1302	1849	674	636	1858	1129	993	968	1674	1258	816	1513	1931	836	1524	730	1185
44.6333	1053	2091	1364	1145	958	1689	1412	1204	1731	607	1989	1022	2050	1412	2005	1880	1073	2920	2412	2688	2397	1748	3764	1754	1278	1213	517	2312	1344	1279	1698	2020	1175	1698	416	731	1737	1484	862	770	1792	1362	925	1737	1776	1771	1856	300	1217
46.6333	1243	1800	1639	1270	878	1432	1183	1581	1785	863	1572	1189	2051	1082	2239	1438	1429	3643	1758	2365	2165	1823	4235	1779	1740	1702	482	1403	985	1459	1354	1999	1990	1885	491	723	1713	1393	862	985	1508	1471	1039	1604	2164	1206	1877	404	1273
48.6333	1148	2143	1794	1043	1069	2021	1071	1472	1620	775	1665	634	1941	1452	2048	1873	1263	1652	2977	2783	2517	1476	2889	1829	1382	1145	596	2340	1273	1767	1118	2131	1232	1500	845	562	1569	1583	1376	1077	1765	1674	1015	1831	1995	1430	2113	698	1296
50.6333	1131	1993	1954	1019	1173	2368	1797	733	1568	1350	1673	988	1964	1145	1798	1574	1471	3645	2061	2208	2247	1670	3839	2148	1189	1074	655	2100	758	1295	1844	1741	1828	1116	695	687	1678	1770	1424	1120	1428	1534	697	1553	2090	1040	1007	370	1320
52.6333	1483	1899	1982	1319	915	1486	1753	945	1866	1463	1771	1197	2042	1024	1345	1893	1360	3785	1804	2603	2140	1794	3985	1958	1178	1523	612	2044	1456	2143	1508	1548	1690	1885	557	834	1979	1791	1337	1309	2346	1788	1206	1834	2347	1458	2869	402	1402
54.6333	957	1382	2152	1306	1309	1677	1482	1428	2042	1012	1586	1399	1894	1374	1604	1746	966	2704	2356	2709	2297	1721	3427	1346	1432	930	618	1911	1441	1208	2365	1716	2204	1532	1126	928	2089	1893	1207	1122	1562	1843	1065	1976	2221	689	1912	315	1492
56.6333	1376	1644	2150	1028	936	1736	1430	1065	1748	686	1859	1266	1860	1347	2284	1738	1637	2681	2334	2549	2503	1552	3674	1657	1363	1328	608	1981	974	2067	1647	1741	2044	1134	1078	701	2089	1087	1310	1137	1487	1851	1330	1984	2105	1743	1972	412	1091
58.6333	1322	1382	1421	1523	1136	1690	1306	1447	1980	723	1725	1160	1642	1513	2468	1383	1172	2786	1715	2165	2687	1647	3696	1444	1338	1148	656	2220	1693	994	1182	2014	2411	1390	1075	1026	1815	1396	1651	1374	1669	2026	1189	1832	1846	912	2127	789	1191
60.6333	1424	1632	2020	1215	1290	1709	1429	1774	1771	1152	1346	1376	1909	1416	1333	1412	1141	2989	2194	2314	2184	1656	3328	1775	1352	1091	583	2178	1289	2075	2013	2216	1484	1689	498	855	2133	1663	1473	1055	1804	1568	946	1007	2002	2077	1488	576	1476
62.6333	1185	2125	2329	1375	1348	1520	2197	1632	1823	1233	1781	800	1713	1140	1559	2011	1050	2679	1730	2179	2488	1279	3347	1214	1526	1146	601	1967	1870	2134	1566	2202	1469	1202	1203	1090	2055	2219	1699	1283	2084	1871	1211	1671	2106	947	2067	363	1333
64.6333	1415	1899	2040	1395	1484	1435	1440	1208	1643	906	516	1423	1581	1524	1200	2332	1121	2386	2161	2289	2299	1477	3037	1844	1176	1034	598	1774	1797	2277	1701	1757	2076	1719	505	633	2067	1786	1590	1615	1971	2055	1097	1113	2009	816	1913	426	1221
66.6333	1199	1407	1794	1349	1603	1863	1277	1145	1799	925	1025	1251	1670	1398	1804	1535	1103	2507	1937	2254	2625	1376	3386	1653	1621	895	697	1810	1409	1818	1826	1737	2436	1376	1255	1040	2463	1691	1450	1596	1404	1870	1558	876	2006	835	2451	451	1482
68.6333	1211	1294	2457	1320	1715	1679	1122	1205	1757	1353	844	1571	1587	1448	1060	2320	1138	2184	1873	1856	2270	1551	3259	1517	2069	951	574	1687	1910	1564	1515	1592	2824	1010	1353	1012	1967	1779	1642	1723	1904	2033	1525	1908	2155	1071	2598	829	1599
70.6333	1350	1640	1302	1403	1763	1877	2015	1411	1713	582	650	800	1503	1096	1193	1650	882	2088	2633	2011	2375	1358	2625	1612	1280	1703	703	1573	1991	1638	1878	1524	2190	1200	1148	810	1824	1585	1585	1343	1351	1700	1037	2097	1954	664	2085	433	1313
72.6333	1411	1441	3266	702	1058	1324	1407	1160	1513	1001	1291	1227	1471	961	1505	1427	1051	2239	1969	2006	1968	1320	3171	1608	1800	959	638	1891	790	1526	1538	1730	1860	471	1464	1000	2076	1274	1590	1367	1854	1847	1688	1423	1899	654	1744	680	1487
74.6333	1408	1573	2193	1355	1491	1567	2219	878	1569	1302	966	1106	1406	1111	2038	1361	1531	2178	2429	2104	2289	1180	3159	1667	1847	1041	587	1391	2020	1839	1282	1672	2574	777	1008	575	2257	1397	1515	1656	1751	1788	1402	1685	1912	947	1726	855	1130
76.6333	1282	1366	1169	1377	1111	1389	1943	932	1645	1129	1323	1370	1381	1365	1063	2114	972	2069	2076	2065	2301	1441	2579	1614	1517	1156	987	1188	950	1429	1630	1354	1402	1227	1074	915	2393	1519	1653	1188	1659	2090	1383	1736	1011	1251	1781	872	1343
78.6333	1485	1409	1490	1478	1760	1550	992	885	1579	629	756	586	1235	1119	1261	1864	1366	2076	1933	1752	2136	1408	2804	1538	1521	1228	668	1424	2172	1700	1233	1523	1181	1364	1159	916	1844	1634	1721	1551	2205	2038	1467	1997	1717	1664	1499	713	1437
80.6333	1229	1292	2441	1431	1420	1655	2087	1249	1710	550	711	1108	1101	1445	1609	1420	1424	1944	2787	1936	2128	1093	3150	1384	1540	1187	858	1318	755	1243	1258	1317	2206	1212	1303	679	2363	1695	1467	1272	1204	1852	1441	1936	1522	924	1503	745	1212
82.6333	1097	1593	2155	1102	1049	1116	638	890	1680	1178	1183	1345	1447	1145	1861	1735	981	1681	2337	1633	2176	1180	2779	1374	1253	1023	672	1326	2043	1435	1380	1470	2746	1087	1347	904	2044	1565	1709	1570	1060	2061	1180	1357	1789	827	1845	802	1053
84.6333	1388	1458	1677	1154	1493	1326	1565	800	1702	685	1087	1353	1268	1334	1754	1939	1117	1710	1837	1733	2416	1380	2255	1501	1500	981	660	990	780	1030	1065	1515	1461	825	694	959	1820	1642	1646	1693	1886	1896	1170	1896	1673	854	1605	861	1255
86.6333	1276	1423	2439	1257	1578	1629	1713	979	1640	1270	544	935	1264	1196	1645	1772	974	1998	1994	1622	2241	1303	2115	1542	1231	695	670	835	1311	1399	1347	1245	2361	714	1254	593	1926	1259	1661	1513	1825	1985	1440	1604	1696	1368	1922	1147	1204
88.6333	1165	1557	2605	1172	1294	1576	1996	1268	1517	836	1120	781	1211	1200	1453	1920	1042	1662	2370	1587	2140	1170	2471	1263	1050	1466	641	1179	883	1796	1230	1115	2167	769	932	989	2751	1128	1704	1847	1312	1822	1305	1815	1546	1254	1838	444	1122
90.6333	1234	1641	2751	1360	1478	1139	1872	664	1665	1877	783	953	1225	920	1170	1500	879	1550	2211	1532	2102	1144	1292	1482	1254	1439	673	1527	709	1300	1142	1160	1998	815	601	751	2455	1492	1436	1948	1511	1775	1154	1540	1422	719	1892	1044	1250
92.6333	1229	1269	2226	860	1513	738	1975	914	1451	802	850	847	1073	1015	1604	1206	1323	1808	2019	1492	2106	1077	1974	1261	910	922	679	1196	1131	1002	1378	1195	1292	734	1183	886	2172	1622	1507	1554	1440	1961	1210	1850	1588	769	1657	548	1138
94.6333	1163	1175	2236	1415	1274	954	1887	1173	1486	1100	1161	790	1092	969	1140	1254	930	1810	1931	1761	2214	1153	2000	854	1458	1340	767	1261	956	1135	904	1127	1530	664	1191	715	1804	1289	1414	1358	1259	1787	1216	1528	1446	819	1309	943	961
96.6333	1268	1731	2380	1222	1081	1348	1242	661	1460	871	1011	1225	951	874	706	1746	915	888	2518	1850	2138	1163	1857	1185	1077	1435	700	1232	984	1035	1391	1029	1049	488	1224	364	1931	1210	1411	1748	1269	1697	1173	1549	1558	845	1220	1058	1125
98.6333	1307	1574	2211	1092	1301	1464	1940	1060	1527	542	1081	1168	1053	1008	1325	1235	700	1642	1486	1574	2125	1143	2349	1224	1091	1443	601	840	1005	1398	916	1085	2036	495	979	355	2371	1654	1653	1650	1435	1867	1099	1686	1304	715	1380	572	1061
100.633	1239	1431	1412	1228	1533	959	1581	727	1374	960	695	714	1012	965	973	664	1031	1456	1831	1558	2049	985	1998	1089	898	808	747	1311	1416	1077	652	1201	1497	655	892	870	2222	1395	1473	1754	1124	1798	1246	1238	1358	514	1486	1136	1025
102.633	1271	1170	1334	1166	1772	1515	1729	1040	1355	1738	958	1113	990	862	1734	1272	896	1426	1855	1781	1943	961	1784	1378	1222	1224	618	1221	729	1198	1256	1137	2187	949	731	733	1834	1180	1612	1515	1465	1775	1519	1539	1326	1014	1079	605	1053
104.633	890	1174	1419	1378	1397	645	1154	721	1564	1300	966	957	1021	801	1749	780	807	1662	1611	1596	1970	1125	1415	1160	1032	782	631	1242	1464	788	581	1093	1937	514	1120	656	2351	1383	1427	1821	1330	1756	1419	1527	1165	670	790	988	1030
106.633	1400	1001	2266	1257	1410	941	829	918	1289	981	573	1268	1035	1109	1325	1599	725	1457	1700	1556	2094	951	1571	1171	929	1067	1047	813	1476	1196	1129	1200	2069	765	1008	604	1927	1384	1604	1759	1220	1792	1129	1396	1291	476	1095	509	951
108.633	1025	1335	1855	1204	1554	1087	908	540	1533	464	458	1129	818	972	1451	1286	828	1393	1982	1432	1947	1053	1755	1434	944	882	657	1117	844	1310	899	913	861	579	489	662	2112	945	1388	1563	1103	1777	1404	1361	1266	763	1282	966	898
110.633	1103	1008	2400	1234	1656	1345	1662	734	1213	1010	865	964	984	697	1438	562	746	1503	1676	1495	2003	979	1573	1249	1156	999	980	1225	788	854	754	1159	1701	506	358	446	2148	1279	1385	1291	781	1859	1554	1419	1228	573	1216	706	966
112.633	1296	1005	1827	1403	1266	944	1125	728	1109	573	708	921	842	748	1231	867	906	1288	1426	1552	2114	994	1389	1184	987	1168	752	1090	1437	1014	949	1227	1318	531	1075	743	1769	1077	1264	1610	1323	1771	1313	1547	1192	719	1311	749	987
114.633	1129	901	2353	943	1413	813	1215	928	1417	1394	749	641	938	953	1234	944	667	1485	1584	1502	1984	1059	1322	1098	996	786	629	759	758	1053	959	1005	1882	852	919	749	2015	1354	1446	1260	1408	1712	1069	1469	1143	1071	1117	1017	886
116.633	1106	1297	1574	1315	1076	975	1512	893	1171	793	693	1046	875	835	1270	1390	776	1026	1657	1523	1936	946	1210	1061	1214	817	629	1112	1046	1162	1006	823	1273	603	650	646	2351	1204	1461	1466	1330	1764	1289	1372	1203	539	842	520	859
118.633	1006	837	1821	1378	1710	987	989	624	1223	633	656	965	664	829	1161	819	752	1038	1494	1310	1904	1047	1317	1210	665	1018	753	565	1339	867	803	994	1183	645	707	642	1869	1515	1628	1665	665	1933	1232	1375	1229	741	1306	913	907
120.633	1056	1270	2169	1244	1221	1218	1527	888	1234	661	529	919	911	777	1256	1460	785	1199	1695	1324	1827	889	1324	792	819	977	883	612	1419	1147	1042	907	1096	702	788	589	1816	1215	1264	1701	1209	1230	968	1523	1138	711	1260	871	777
122.633	1296	1036	1693	1227	1128	732	1823	890	1044	883	590	516	943	761	1194	883	771	1479	1528	1138	1792	1059	1274	1042	1070	595	914	603	1195	903	1014	835	1148	363	863	420	2052	1030	1266	1371	1115	1495	1412	1829	1103	669	1301	907	808
124.633	1046	1181	1998	1206	1432	1159	1134	656	1105	869	738	996	884	743	1289	823	976	1251	1721	1471	1835	1029	1147	1012	800	816	643	842	1248	810	900	847	1559	375	523	548	1988	1388	1639	1569	1090	1482	941	1342	1213	710	1260	915	757
126.633	1017	1053	1282	1157	1463	636	1406	726	1350	486	451	743	847	622	1119	701	929	826	1678	1249	2036	941	1255	1157	1078	1023	726	1020	1144	877	671	898	1338	286	956	511	1969	1037	1338	1401	1135	1574	1235	1135	1211	1044	937	938	796
128.633	990	1159	2024	1407	1928	956	1274	937	1113	839	682	790	885	713	1438	1109	860	1502	1642	1441	1893	850	1108	819	896	823	656	815	1287	924	828	781	1771	422	955	612	2098	1291	1422	1349	1050	1600	870	1509	1144	609	1325	584	758
130.633	974	958	2087	1224	1277	830	957	779	1048	513	480	965	843	629	1467	1345	691	987	1758	1459	2201	941	1160	1171	710	1166	635	857	1180	910	814	783	1738	415	511	798	1908	1433	1540	1758	1160	1625	1006	1342	927	515	1362	586	856
132.633	1143	917	1815	1097	1769	1130	1481	776	1050	1799	747	802	692	711	1153	1246	917	899	1885	1272	1830	873	1213	1141	841	1099	1013	811	1115	977	952	793	1696	560	570	648	2105	1449	1300	1463	1070	1532	925	1429	1132	674	975	772	839
134.633	1189	945	1504	1096	1324	853	978	683	1209	882	731	726	764	629	1001	1220	650	1238	1522	1306	1895	960	1246	1191	1199	807	789	621	979	1025	838	730	1157	475	809	848	1825	1507	1397	1566	991	1513	999	1363	1153	688	987	689	735
136.633	957	1060	1893	1276	1463	631	791	885	1221	659	505	805	571	647	1165	998	495	1260	1231	1225	1722	833	1231	620	702	822	701	783	766	926	781	873	1091	436	523	674	2135	784	1418	1263	892	1643	1059	1299	971	506	1073	1154	930
138.633	1093	964	1085	1336	2381	1145	1141	622	1037	562	548	887	761	679	942	1243	892	1423	1721	1185	1779	870	1033	1131	956	633	780	861	1111	835	667	734	1447	447	1012	689	1743	1275	1530	1571	1096	1452	1166	1362	1116	614	926	889	849
140.633	1033	850	2390	1325	1027	902	1283	744	1109	472	471	605	795	601	874	1014	738	897	1455	1187	1950	908	1150	1022	798	904	691	896	1171	905	988	704	1478	437	670	736	1891	1297	1230	1456	1096	1521	854	1257	1027	609	972	955	926
142.633	1117	1027	2143	1013	1248	861	1140	676	1079	712	533	778	645	673	1065	801	604	1095	1473	1300	1842	727	1010	966	863	990	683	737	1191	734	792	634	959	459	659	584	1758	996	1503	1617	1117	1446	1090	1375	1180	840	1213	778	759
144.633	983	1057	1600	1179	1320	1026	1074	703	1054	1985	512	657	769	503	1006	737	589	880	1449	1182	1746	862	1184	1094	729	720	674	746	785	947	894	856	1335	186	407	475	1875	958	1433	1410	1204	1367	970	1048	1082	681	694	459	658
146.633	935	894	954	1075	1195	840	1125	785	1099	570	631	505	648	586	693	1068	856	1081	1473	1201	1846	789	930	904	663	903	719	678	768	697	793	700	1063	616	785	523	1781	1189	1133	1484	961	1515	1102	1167	1172	505	1160	835	869
148.633	1008	806	1761	1155	1355	803	1042	735	1187	475	576	636	752	633	764	903	771	1039	1683	1387	1789	797	1083	914	893	761	958	730	1270	759	794	821	1166	414	874	494	2042	1222	1363	1295	1181	1397	1207	1386	970	849	1054	673	789
150.633	1009	897	1383	938	1112	1044	920	656	1024	2123	477	678	819	711	980	1221	839	890	1714	1286	2009	791	1001	1056	643	817	806	772	705	787	686	676	810	396	619	463	2043	1140	1184	1128	1206	1415	1101	1112	1180	678	1035	793	858
152.633	1045	715	1898	972	1007	781	1010	495	1039	471	465	644	593	716	583	748	725	1135	1363	1269	1737	820	1113	886	690	883	647	845	1101	849	740	576	1312	499	592	554	1719	1256	1505	1455	1051	1211	1105	1272	1001	670	1041	621	713
154.633	1024	689	1426	1014	1705	904	900	515	1139	1848	465	842	572	628	701	955	620	770	1415	1218	1814	861	877	1143	676	751	719	513	882	763	772	723	1348	567	508	340	2024	1276	1269	1442	1305	1503	996	1065	1053	522	931	1014	637
156.633	1039	1149	1909	1060	1514	584	1258	556	1042	705	516	739	724	572	986	966	911	877	1674	1249	1847	793	971	1030	778	733	765	808	1126	765	930	633	841	559	757	518	1941	1230	1500	1127	1121	1281	1068	1152	1036	731	983	953	728
158.633	956	1063	1666	928	1469	878	1065	800	1040	1340	412	786	587	592	574	938	722	992	1577	1156	1864	923	916	1037	867	646	826	727	1029	689	623	594	1386	312	632	483	1740	1151	1378	1312	1019	1417	953	1384	1196	916	1068	761	720
160.633	1116	905	1166	1120	1134	1105	793	739	942	518	479	686	722	747	1011	1020	805	980	1603	1107	1612	749	1038	928	656	791	996	688	599	823	873	715	1287	535	407	277	1727	1095	1589	1166	1312	1256	1133	1303	921	591	1089	574	729
162.633	1090	811	1938	863	1054	927	1244	500	1286	498	440	769	673	486	1021	899	1054	884	1606	1305	1819	802	1023	911	732	704	921	624	1007	617	687	537	823	384	828	513	1779	1178	1329	1459	1062	1414	1096	1224	1042	536	1156	828	849
164.633	1101	947	1322	1048	1389	767	803	698	908	588	591	652	690	681	631	562	595	807	1402	1060	1822	794	870	1011	776	783	746	673	614	894	757	636	774	359	630	627	1685	1073	1522	1073	1020	1420	960	1506	897	649	1032	491	512
166.633	1157	861	1055	967	916	799	726	625	1187	558	463	833	649	763	569	779	768	1104	1666	1118	1931	839	1035	1131	703	831	676	566	1085	678	673	779	730	323	869	560	1965	1346	1145	1487	1143	1330	981	1144	1019	989	965	811	586
168.633	1089	719	1330	1094	1209	856	685	631	833	486	411	566	682	625	784	934	579	751	1684	1087	1701	823	901	1234	621	626	681	585	581	641	634	669	750	364	573	347	1672	1302	1297	1515	878	1359	1111	1268	1054	885	1027	685	753
170.633	968	883	1969	910	1161	944	1021	524	1032	684	572	770	538	564	563	876	511	800	1336	1098	1584	810	1081	1025	934	845	963	702	902	809	648	766	1328	372	686	716	1970	1259	1329	1051	909	1239	898	1161	1118	506	1016	752	657
172.633	969	754	1060	1087	1047	955	742	845	1039	1401	594	716	581	585	487	596	543	847	1463	1171	1872	882	1030	878	686	889	694	643	633	744	600	740	1377	424	731	556	1665	1212	1554	1143	958	1357	902	1250	921	725	962	621	609
174.633	1064	909	1399	1006	1335	676	758	685	850	592	337	646	545	609	1127	695	789	849	1544	1196	1731	839	1010	878	843	873	733	699	862	742	587	551	1001	259	717	614	1669	1173	1433	1015	1128	1249	980	1259	1014	630	1134	450	631
176.633	1024	923	1987	1212	1191	938	961	405	1021	583	496	671	694	543	743	936	659	818	1467	1107	1803	899	929	910	938	652	825	683	899	586	615	544	1259	279	690	565	1971	1005	1381	1358	1286	1407	814	1235	952	555	1205	492	646
178.633	1187	821	1255	1141	919	928	1027	692	1058	492	463	618	632	605	888	780	543	652	1312	1230	1752	854	930	875	947	821	727	666	1026	751	709	677	878	377	493	587	1688	1147	1204	1431	1015	1211	915	1143	1077	665	1003	429	642
180.633	921	756	1611	997	1360	657	877	573	1069	570	450	669	623	659	822	687	520	702	1531	1204	1854	986	1027	1007	646	785	674	654	829	666	746	730	616	86	656	604	1792	1258	1052	1056	1150	1311	1214	1181	926	564	904	865	812
182.633	1079	865	1287	955	1385	667	682	519	1006	314	385	583	636	462	833	828	542	643	1450	1140	1806	833	1053	1011	843	868	692	737	628	838	682	612	1096	376	723	594	1838	1177	1307	1096	1043	1182	899	1055	1007	606	871	610	819
184.633	1053	1035	1020	1207	981	698	1136	537	896	371	353	308	694	656	672	643	561	834	1591	1426	1918	863	972	977	932	822	739	684	782	830	575	634	852	367	712	561	1757	1150	1259	1264	1237	1104	1219	1181	942	1030	926	487	607
186.633	1009	960	1123	1045	1229	905	782	639	1080	414	481	721	589	677	670	871	483	918	1516	1348	1716	997	1074	943	718	907	814	689	1064	736	753	732	919	452	646	624	1690	1154	1492	1296	1149	1205	1074	1140	976	884	1081	828	586
188.633	1042	774	1022	1090	1371	850	676	520	1046	356	418	633	479	661	718	616	590	720	1569	1364	1839	1055	1059	974	958	780	686	694	739	818	541	528	865	375	628	699	1921	1320	1074	1271	1187	1152	993	929	970	744	1075	557	677
190.633	1032	930	964	1116	819	682	1061	716	877	519	550	638	491	654	860	937	556	726	1403	1272	1904	869	1088	987	664	866	733	629	949	643	482	740	1018	347	537	572	2276	1277	1208	1177	1059	1384	958	1312	888	589	974	719	576
192.633	947	864	1347	983	1126	834	1031	669	929	560	461	575	557	495	781	762	705	688	1444	1194	1821	933	1113	1135	838	829	752	715	947	803	633	707	1309	373	612	592	1943	1197	1205	1076	946	1186	917	1084	818	742	882	813	702
194.633	1171	935	1183	1009	1508	711	788	665	875	495	468	653	580	607	839	879	662	768	1505	1211	1431	942	1093	1053	700	945	774	782	681	652	666	786	956	612	461	561	1763	1000	1203	1264	1038	1273	915	1074	978	491	915	795	773
196.633	990	719	1778	933	1147	795	1075	562	887	385	439	537	550	623	622	852	656	625	1551	1265	1898	1131	1158	1007	701	919	863	722	797	831	621	582	1007	405	687	545	1950	1316	1501	1118	1157	1257	975	1210	1028	735	816	429	587
198.633	981	802	1752	1096	874	817	845	607	1000	537	372	525	609	428	687	517	680	602	1491	1332	2005	1045	1146	1215	745	877	756	788	846	813	593	805	830	315	766	584	1641	1169	1276	1014	1004	1176	926	1040	1014	498	966	559	601
200.633	1058	923	1027	1043	1336	750	755	692	815	691	504	560	561	549	912	914	541	680	1524	1342	2094	1011	1131	1203	677	877	900	709	595	858	788	636	872	438	462	516	1916	1170	1240	1248	1005	1263	859	1268	1070	665	1115	594	630
202.633	1114	730	1316	1112	1145	541	672	520	890	625	469	542	596	531	826	757	435	771	1647	1496	1811	1004	1116	1229	718	945	683	740	820	846	721	775	934	455	587	537	1808	1231	1324	1187	1207	1119	1088	1266	733	786	839	447	666
204.633	1030	798	959	1002	1150	798	1060	628	910	500	465	568	494	540	536	850	589	763	1635	1531	1933	1092	1139	1482	804	938	788	850	887	806	802	751	853	599	673	698	1785	1049	1330	1178	1182	1303	975	1124	811	644	1033	673	559
206.633	918	675	1309	1152	1286	608	866	597	939	386	458	482	512	549	869	499	602	790	1632	1628	1976	1213	1327	1259	982	1004	766	829	773	866	705	575	886	609	520	840	1898	1252	1180	1260	1019	1094	865	1066	882	604	903	471	614
208.633	1092	963	1394	991	1268	777	675	521	992	753	433	494	607	518	645	816	696	686	1674	1622	2011	1366	1273	1471	864	882	775	742	859	718	666	810	1082	541	805	459	2095	1240	1294	1250	1105	1012	848	931	962	647	943	702	518
210.633	1083	886	1782	960	962	590	820	512	938	427	343	550	459	471	477	820	673	760	1508	1619	1840	1163	1371	1397	721	1016	775	812	920	858	741	790	1010	396	762	721	2079	1258	1259	1209	1280	1000	1183	1413	689	668	863	729	578
212.633	1093	956	1038	889	1123	886	1046	504	974	387	435	600	541	501	605	804	461	723	1826	1600	1901	1310	1313	1378	795	901	904	909	821	656	622	763	1209	488	665	662	2149	1032	1168	1190	930	1198	946	1023	911	638	889	502	468
214.633	1092	734	1297	977	1077	754	771	701	827	556	494	711	548	537	718	624	457	567	1558	1635	2028	1285	1328	1411	928	1094	816	891	723	847	900	911	1178	615	554	533	2077	1188	1377	1110	1281	1282	881	1244	833	505	871	638	688
216.633	1074	921	1740	1135	1067	771	847	588	934	388	497	564	518	351	879	789	580	624	1840	1797	1936	1328	1626	1539	950	1059	894	884	890	917	702	720	977	421	736	748	2347	1077	1424	1303	1068	1164	944	1138	759	647	929	714	655
218.633	1060	954	1208	1174	1202	671	764	738	754	971	444	662	508	569	738	691	525	679	1826	1632	2046	1103	1568	1340	856	1110	947	905	788	915	741	841	870	635	695	606	2060	1080	1183	1064	949	1313	1087	666	994	643	839	798	744
220.633	1080	1100	1163	1095	915	645	921	707	856	451	320	635	493	487	807	581	682	612	1974	1847	2180	1401	1348	1547	887	1101	779	810	910	933	801	910	1101	550	762	691	2055	1218	1409	1319	1241	1186	1013	1276	1028	797	792	460	577
222.633	1068	1055	1519	1109	1411	729	609	567	873	563	427	602	484	419	721	727	600	434	1671	1840	1999	1439	1619	1450	1052	1152	813	932	841	956	922	1005	1309	725	583	568	2089	1371	1362	1017	911	1163	899	976	1027	496	772	659	740
224.633	1132	1076	1476	1183	1105	762	783	669	783	891	383	593	534	578	583	713	620	709	1834	1733	2224	1533	1694	1335	1118	1198	1069	933	900	957	761	1012	1091	584	798	848	2139	1323	1159	1295	1024	1093	836	1030	900	608	938	725	487
226.633	1034	979	1188	1121	1321	663	576	715	858	609	426	544	517	490	693	805	598	594	1756	1783	2192	1732	1740	1389	925	1113	978	999	956	1041	748	947	1270	543	717	720	2491	1219	1274	1257	1082	1327	789	481	966	527	994	713	607
228.633	1252	1083	1560	1126	1085	622	644	483	801	445	524	635	454	502	545	723	586	629	1762	1951	2257	1493	1672	1747	1123	1127	1017	1011	1004	917	964	1008	1114	662	849	625	2157	1222	1534	1184	1141	1177	827	1080	997	475	744	494	675
230.633	1360	1087	1137	1249	1165	874	868	573	858	398	469	476	489	546	591	696	554	672	1887	1937	2077	1647	1615	1765	962	1132	1126	1092	927	1012	829	931	1107	655	900	868	2256	1377	1261	1449	919	1235	1040	1205	842	447	937	587	711
232.633	1338	1051	1907	1041	1207	964	915	561	954	415	598	570	485	488	843	606	468	552	1882	2047	2278	1676	1855	1865	1233	1244	929	1137	1048	1095	966	1141	1431	800	704	641	2924	1305	1241	1235	1079	1055	1034	1111	911	498	950	405	680
234.633	1178	1083	1469	1172	1263	915	1078	654	906	1521	335	625	489	447	675	667	467	586	1869	2041	2171	1898	1743	1999	1190	1341	1007	985	1171	1025	877	1161	1220	909	852	799	2851	1406	1247	1201	939	1174	969	809	921	602	1011	795	503
236.633	1170	1159	1500	1126	1178	750	829	636	798	448	475	561	516	479	483	616	686	701	2100	2076	2242	1899	2305	1712	1143	1349	1044	959	1132	1155	995	995	1354	759	904	885	2326	1327	1358	1250	827	1099	889	1075	879	677	666	823	551
238.633	1342	1185	1204	1119	1224	935	649	711	856	578	402	574	538	472	779	758	429	660	2123	2115	2365	1469	2069	1724	1072	1389	1004	1055	1067	1144	958	1188	1434	774	752	780	2982	1433	1208	1092	1343	1076	1056	1101	978	704	757	581	575
240.633	1347	1150	1688	979	927	754	874	523	1015	805	429	593	536	412	399	706	558	724	2028	2395	2341	1821	2222	1712	1130	1563	1044	1139	987	1236	1094	1153	1400	921	756	806	2500	1554	1562	1015	941	1271	962	1052	932	597	869	779	478
242.633	1340	1157	1423	1027	1047	803	777	672	913	468	439	598	493	462	727	644	508	621	2035	2381	2530	1867	2259	1858	1317	1372	1152	1121	1132	1215	951	1090	1421	965	811	912	2642	1371	1378	1319	1093	1253	1038	1167	965	542	677	767	598
244.633	1257	1296	1098	1166	1208	796	670	764	839	633	447	484	502	573	551	756	482	487	1992	2348	2469	2187	2168	1738	1094	1418	1135	1184	1109	1221	1052	1201	1465	985	982	1013	2925	1508	1596	1260	956	1435	734	805	914	474	1000	678	499
246.633	1337	1222	1852	1146	1253	947	712	624	873	383	471	603	502	431	764	714	710	669	2186	2480	2749	1910	2427	2338	1303	1622	1229	1312	1245	1301	1001	1238	1528	1042	851	719	2683	1540	1456	1258	1071	1239	936	1060	961	570	799	713	591
248.633	1444	1233	1465	1052	1264	930	845	641	832	447	410	344	504	409	651	616	547	636	2138	2531	2367	2328	2134	2131	1316	1679	1180	1123	1245	1254	1028	1236	1412	901	999	904	2776	1625	1624	1074	1003	1150	982	881	865	608	863	634	513
250.633	1467	1246	1322	1122	1261	976	729	595	1086	554	465	386	515	540	751	605	498	546	2219	2732	2542	2120	2421	1971	1418	1652	1183	1227	1270	1319	1222	1396	1299	945	946	964	2813	1597	1506	1402	1050	1322	934	998	927	484	1008	672	591
252.633	1338	1358	1895	1189	1156	982	729	718	889	504	399	480	516	395	637	556	515	538	2273	3061	2492	2496	2327	2208	1434	1454	1174	1353	1310	1338	1224	1420	1402	874	1027	938	2822	1549	1520	1060	1108	1225	755	870	1014	547	742	690	606
254.633	1564	1456	1228	1196	1196	896	743	750	838	639	454	562	511	578	649	763	671	533	2377	2639	2965	2192	2373	2023	1351	1680	1299	1434	1266	1411	1110	1357	1555	997	934	1006	3133	1740	1421	1141	1112	1433	1053	1038	884	554	914	697	764
256.633	1672	1400	1913	964	1108	917	694	537	887	571	449	609	510	561	457	618	461	545	2619	3451	2877	2138	2974	2363	1455	1758	1266	1381	1422	1466	1068	1547	1688	1140	1038	882	3281	1868	1417	1108	990	1436	818	753	974	755	840	689	483
258.633	1735	1362	1544	1210	1207	1108	645	712	867	469	476	522	533	434	650	631	629	534	2468	2739	2794	2476	2380	1987	1255	1784	1280	1435	1304	1445	1206	1622	1715	1147	992	1022	3549	1702	1435	1299	1196	1451	1054	1064	1052	593	896	636	653
260.633	1652	1551	1311	1220	1189	1097	719	689	991	555	437	605	464	451	546	630	563	574	2675	2917	2973	2615	2742	2266	1679	1724	1354	1415	1392	1565	1332	1389	1539	1426	1041	1211	3292	1927	1700	1174	1047	1213	911	716	889	606	753	704	527
262.633	1638	1615	1542	1298	1419	1020	848	846	913	548	497	561	477	484	554	670	504	580	2479	3084	2864	2628	2724	2384	1472	1920	1408	1602	1491	1688	1589	1421	1794	1216	1110	950	3722	1951	1585	1219	998	1542	786	920	998	624	908	851	786
264.633	1702	1673	2060	1242	919	1329	758	751	963	526	419	496	474	506	580	548	588	604	2656	3374	2967	2784	2704	2482	1531	2200	1380	1871	1430	1723	1210	1553	1786	1065	1159	1003	3419	1769	1483	1098	1059	1382	1010	1147	975	748	873	495	651
266.633	1746	1626	1545	1247	1353	1088	788	771	987	451	475	610	531	430	583	678	490	582	2832	3125	3021	2700	2929	2468	1634	1892	1342	1780	1538	1589	1193	1391	1790	1274	1120	1167	3165	2049	1436	1218	1026	1515	945	1185	980	541	843	556	640
268.633	1796	1764	1509	1300	940	1149	721	790	951	546	493	553	545	454	746	494	458	527	2766	3097	3067	2691	3230	2529	1758	2200	1475	1548	1468	1849	1398	1806	1912	1269	1107	1081	3772	2172	1505	1365	1329	1462	1129	865	964	503	782	472	622
270.633	1965	1773	1912	1209	1060	1239	785	849	1080	457	433	547	559	407	748	691	604	555	2913	3834	3671	3026	3020	2328	1543	2369	1550	1656	1575	1954	1303	1411	1586	1364	1230	1135	3766	2095	1661	1287	1466	1505	989	1027	979	478	930	650	618
272.633	1932	1781	2047	1345	1413	1251	900	863	1037	613	466	556	571	431	745	484	468	557	3075	3409	3248	3060	2914	2381	1718	2270	1573	1624	1556	1725	1444	1658	1727	1361	1340	1264	3832	2115	1852	1383	1124	1407	1007	1061	1029	666	910	835	780
274.633	2071	1957	2162	1306	1117	1223	718	723	939	900	487	586	531	502	667	626	416	682	3135	3993	3256	2916	3335	3376	1809	2282	1540	1667	1691	1649	1516	1722	1878	1339	1173	1220	4093	2451	1655	1394	1172	1640	1076	1044	759	650	791	800	551
276.633	2094	2040	2160	1409	986	1187	819	762	1188	499	426	527	567	451	687	683	550	499	3182	3741	3377	3434	3135	2349	1892	2534	1561	1699	1658	2095	1582	1998	1793	1746	1199	1272	4449	2367	1824	1253	1363	1746	1068	1135	920	618	874	639	627
278.633	2147	2002	1593	1405	1769	1457	868	868	1036	556	503	657	532	435	714	518	505	478	3074	4501	3528	3118	3293	3315	2093	2484	1588	2153	1798	1716	1391	1725	2021	1609	1254	1513	4463	2568	1918	1482	1362	1783	1052	1377	1062	567	868	704	600
280.633	2268	2178	1750	1500	1113	1579	926	843	1153	577	527	468	611	499	797	588	545	540	3321	3771	3284	3288	3126	2789	1583	2373	1714	1753	1831	1802	1358	1904	2049	1559	1404	1267	4108	2471	2238	1453	1227	1853	1038	1183	1110	628	775	759	631
282.633	2264	2226	2408	1479	1300	1466	1045	856	1066	480	573	565	532	563	680	509	536	454	3396	4241	3644	3165	3413	3525	2083	2577	1639	1911	1951	1744	1772	1954	1994	1728	1419	1167	3835	2572	2041	1255	1435	1619	976	1177	1091	714	792	790	589
284.633	2254	2219	1910	1387	1081	1387	1040	899	1118	539	535	574	488	514	701	714	521	522	3528	4177	3803	3119	3422	2849	1882	2546	1892	1926	1831	1734	1806	1989	1928	1332	1491	1355	4943	3036	1908	1208	1332	1678	1143	1205	987	623	787	544	472
286.633	2517	2370	2378	1413	1255	1474	890	958	1002	519	540	633	569	528	704	619	560	546	3398	3765	3533	3768	4075	3051	1790	2309	1908	2239	1990	2192	1596	1445	1820	1779	1326	1472	4503	3138	1995	1285	1326	1871	1048	1250	987	672	794	511	538
288.633	2199	2561	2081	1607	1355	1566	1080	879	1234	717	561	647	537	405	695	665	637	467	3365	4494	3898	3709	3447	3324	2012	2622	1956	2557	2044	2389	1537	1975	1891	1606	1380	1628	4772	3176	2023	1284	1404	1858	1073	816	1058	704	832	685	624
290.633	2397	2446	2545	1435	1490	1659	1008	904	1047	559	524	563	561	535	508	553	471	551	3661	3992	3832	3566	3648	3048	2049	2277	1874	1937	1958	2554	1626	2222	1771	1823	1445	1276	4956	3327	2224	1262	1469	1961	1299	1245	984	499	915	585	525
292.633	2393	2583	2894	1605	1212	1566	1050	908	1277	1653	587	609	461	528	716	579	417	558	4153	4355	3680	3464	3636	3440	1830	2691	1888	2028	2217	1722	2088	2129	1867	1823	1565	1284	4995	3025	2049	1396	1568	1934	1199	1294	1014	695	784	521	782
294.633	2599	2584	2543	1492	1184	1660	1147	982	1040	538	559	611	509	477	658	633	529	574	3895	4332	4243	4056	4164	2946	2057	3045	1972	2656	2059	2459	1773	2268	2469	2163	1412	1488	5304	3569	2176	1311	1864	1984	1083	1217	1020	677	832	659	508
296.633	2584	2652	2756	1622	1213	1892	1148	967	1127	579	596	541	538	480	705	634	531	590	4161	4629	3948	4223	3729	3725	2131	2932	1761	2443	2117	2719	1559	2380	2016	2053	1443	1720	4905	3809	2405	1319	1388	1860	1025	1001	1095	628	766	664	617
298.633	2860	2867	2845	1645	1237	1758	977	1019	1171	670	624	491	592	477	670	540	527	490	3814	4975	3930	4024	3729	2657	1988	3214	1824	1988	2044	2491	1783	1796	2583	2214	1514	1543	5830	4073	2892	1553	1458	2092	1099	885	1129	562	869	764	744
300.633	2948	3117	2814	1689	1324	1860	933	974	1171	631	696	636	612	529	656	676	670	578	3874	4996	4341	3697	4249	3558	1907	2573	2147	2358	2021	2182	2388	2460	2410	1895	1643	1387	6551	3670	3044	1360	1715	2216	1402	1542	1216	599	723	685	728
302.633	3218	2637	3043	1486	1611	1695	1047	1050	1282	630	637	589	586	483	798	473	413	604	4295	5066	4151	3495	3896	3199	2702	2512	2135	2005	2336	2376	2086	2419	2255	1987	1594	1705	5535	4578	2644	1491	1908	2344	1132	1341	1102	536	822	598	554
304.633	3135	3152	2493	1744	1215	1720	1095	1055	1260	600	657	600	601	496	539	634	500	589	4289	4506	4677	3876	4393	3032	2177	2401	2033	2001	2135	2686	2635	2246	2183	2204	1520	1316	5863	4399	3150	1623	1701	2346	1270	1403	1152	558	863	545	565
306.633	3221	3278	2884	1785	1406	1961	1114	1119	1150	633	571	576	593	521	674	539	569	603	4166	4803	4315	4507	4832	3556	2794	3689	2339	2071	2357	2912	2821	2566	2365	2251	1536	1313	5215	4847	2747	1499	1890	2544	1317	1165	1142	664	724	585	669
308.633	3448	3126	2820	1613	1193	2328	1074	1178	1318	638	637	535	631	463	675	445	469	600	4588	4599	4546	3572	4691	4805	2238	3551	2427	2177	2329	2914	1836	2609	2704	1757	1541	1860	6342	4695	2879	1481	1832	2489	1334	1253	1225	564	924	577	560
310.633	3684	3400	3194	2050	1559	1816	1115	1168	1348	539	690	537	601	514	606	557	521	609	4318	4854	4594	4403	4303	4757	2784	3410	2452	2147	2370	2422	2870	2173	2687	2194	1679	1941	8451	4717	3069	1645	1838	2471	1138	1402	1006	615	884	662	593
312.633	3548	3606	3366	1913	1414	2042	1138	1133	1396	720	644	585	620	529	799	599	468	524	3580	4663	4601	5252	4899	4812	2379	3719	2329	2606	2143	2082	1887	2761	2987	2158	2015	1476	5452	4922	2884	1548	2067	2175	1456	1302	1355	664	865	621	525
314.633	3802	3597	3238	1752	1499	2355	1202	1093	1221	715	668	696	653	511	623	676	500	530	4394	6001	4937	4784	4438	3619	2476	3364	2370	2225	2635	3241	2332	2327	2912	2292	1857	1659	6535	5424	3223	1813	1959	2664	1434	1610	1202	718	884	684	798
316.633	3933	3858	4080	1933	1339	2259	1337	1154	1456	632	690	651	647	517	647	497	414	473	4417	4586	4972	5167	4945	3523	2268	3603	2475	3099	2565	1917	1868	2629	3014	2312	1918	1920	6608	5309	3254	1705	1973	2450	1204	1373	1359	619	923	587	669
318.633	4078	4197	3021	1897	1470	2405	1214	1298	1415	644	650	565	604	467	669	622	662	642	4644	4461	5338	3656	5242	3198	3091	3207	2698	2556	2243	2492	1796	2864	3145	2595	1948	2299	6259	5717	3111	1613	2063	2742	1325	1398	1259	597	896	746	616
320.633	4140	4174	3842	2003	1486	2417	1321	1192	1448	1933	677	613	650	507	639	507	478	655	4893	5223	5344	4179	4889	2750	2972	2929	2431	2554	2847	3238	2103	2052	3026	2742	2052	1571	6192	5255	3397	1811	2389	3037	1319	1546	1228	621	879	571	736
322.633	3817	4168	3726	2138	1601	2095	1388	1292	1419	665	757	515	664	548	714	610	509	625	5014	6011	4917	5096	5097	4657	2527	3077	2282	2210	3039	2801	1897	2051	2741	2733	1770	2100	6554	4997	3602	1758	2686	2790	1417	1600	1349	691	831	741	562
324.633	4411	4291	3430	2092	1759	2414	1338	1229	1542	1324	716	603	687	376	815	536	460	515	4856	5233	4753	4108	4402	3414	3063	4256	2375	2556	2685	2433	2044	2863	2288	2434	2372	1947	7299	5493	3648	1871	2150	3009	1464	1398	1450	602	814	702	554
326.633	4530	3790	3293	2241	1687	2782	1261	1505	1524	1079	766	680	697	425	751	504	577	708	5369	6582	5085	4482	4720	3217	3449	4687	2862	2792	2895	3544	2103	2764	3257	2832	1841	2519	7615	5353	3554	1900	2269	2884	1551	1421	1576	666	1019	740	517
328.633	4728	4640	4046	2056	1540	2992	1464	1465	1575	1223	777	720	687	534	778	504	572	561	5205	6220	5052	5698	4896	3829	3607	3199	2427	2579	3128	2374	2595	2976	2289	3141	1929	2261	6043	6334	3899	1963	2419	2899	1513	1786	1531	698	812	627	559
330.633	5132	4727	3812	2222	1861	2619	1339	1357	1626	757	883	619	682	541	731	630	501	577	5233	6091	5340	5413	4657	5497	3165	4798	2967	2395	2458	3455	2042	2798	3221	2441	2464	2392	6901	6656	3920	1996	2603	2922	1466	1737	1595	767	890	908	573
332.633	5226	5207	3928	2365	1780	2959	1413	1383	1672	1194	818	624	691	696	686	559	601	584	5025	5813	5574	4166	4962	4049	3713	4944	2816	4177	2452	3863	2919	3269	3273	3293	2426	1761	6584	6793	3999	2045	2504	3121	1631	1634	1313	645	867	650	617
334.633	5279	4680	4036	2247	1830	2930	1509	1394	1472	791	845	620	787	576	779	546	468	521	5338	6294	5066	4888	5840	4954	2920	3236	3131	2741	2701	3808	3089	3179	3488	2748	2069	2122	6897	6918	4037	2156	2431	3332	1548	1999	1608	635	976	598	811
336.633	5276	4956	3831	2307	1650	2453	1467	1566	1741	1850	837	715	771	556	868	634	658	558	5899	7284	5567	4819	5898	4798	2862	5183	2609	3475	3415	3158	2317	3049	2843	3370	2602	2058	6858	6566	4432	2163	2657	3285	1775	1617	1681	852	1010	758	637
338.633	5695	5307	4236	2196	1734	3186	1640	1548	1808	2512	838	621	780	641	724	564	533	627	5595	5705	5130	5912	4886	5531	3275	4524	3028	3309	3064	2386	2752	2440	2906	3157	2801	1842	10449	6234	4553	2342	2805	3410	1524	1852	1609	727	907	584	618
340.633	5609	4621	4482	2250	1889	3429	1653	1576	1830	828	871	695	818	566	678	632	547	609	5325	6499	5340	4594	4783	6094	3145	4593	2921	2482	2605	3277	2239	2813	2457	3448	2577	1687	7315	7279	4636	2347	2962	3399	1653	2019	1695	734	911	770	561
342.633	5805	5451	4251	2385	1790	3586	1584	1584	1744	1198	869	640	729	504	825	647	621	570	5863	6346	5883	5496	5246	4775	3683	4612	3314	2603	3643	3030	3272	3304	2766	2383	1853	1873	6952	7983	4382	2511	2768	3528	1778	1957	1739	829	990	751	536
344.633	5915	5977	4389	2211	1860	3396	1674	1785	1910	1009	875	657	762	682	767	621	632	632	5926	5775	5898	4985	6385	3644	2856	4830	2811	2622	3254	3833	2169	3617	3771	3151	2117	1897	7074	7926	4872	2395	3020	3793	1883	1830	1722	755	983	929	565
346.633	5871	5863	4999	2556	2049	3716	1633	1783	1996	805	876	681	798	646	812	691	602	572	5755	6515	5474	5406	5810	5525	2691	4863	3407	2716	3612	3827	2288	3213	3823	3406	2110	2607	10024	7196	5102	2399	3486	3529	1940	2017	1852	809	885	658	687
348.633	6234	6297	5053	2458	2173	2897	1652	1745	2074	1335	1018	653	795	570	759	607	699	675	6089	6753	6101	5341	5222	5051	2725	4914	3438	3679	3635	4191	3272	3620	3800	2425	2190	2588	10104	7758	4933	2527	3375	3603	1670	1853	1966	773	1023	812	733
350.633	5374	6270	4986	2714	1970	4199	1841	1877	1927	866	941	705	751	649	799	683	646	586	6187	6447	6067	5996	6749	4979	3253	4273	3219	2694	3875	4187	3319	3619	2834	2818	2032	2340	8881	8926	5372	2640	3225	3970	1962	2030	2016	837	1102	745	764
352.633	6724	6351	4925	2499	2200	4302	1808	1701	2132	888	1018	621	869	604	798	509	522	867	6742	6927	6281	4963	6074	3914	4172	5616	3321	4151	3562	3035	3082	2930	3511	3831	2850	2128	9662	8776	5269	2470	2879	3975	1742	1887	1958	823	1045	913	819
354.633	6272	6517	5131	2708	2281	3690	1889	1839	2178	867	938	745	902	736	810	614	670	633	6305	5603	5903	6324	5402	4408	4035	4905	3438	2717	2731	3316	3403	2770	3512	3408	2192	2621	7451	8873	5679	2795	3817	3721	2016	2084	1906	845	1157	956	584
356.633	6718	6816	5499	2552	2486	3519	1853	2010	2153	868	1069	808	907	647	841	584	539	597	6053	7047	6429	5727	5132	4033	3540	4244	3804	3354	3201	3150	3108	2692	3941	3008	2630	2040	8236	9148	5505	2873	3574	4127	2031	2207	1990	827	1028	978	582
358.633	7323	5780	5729	2900	2234	3979	1909	1934	2208	900	1035	768	943	638	852	642	621	685	6219	6840	6460	5203	6367	3937	3794	4670	3898	3378	3258	4522	3682	3302	2956	3940	2437	2006	10162	9985	5299	2841	3766	4058	2224	2130	2073	795	1030	654	624
360.633	6756	6660	5608	3161	2026	3370	1995	2053	2309	996	1010	728	855	702	826	719	636	777	6017	6100	5903	6000	6605	6949	4053	5464	3350	2942	3007	4859	2241	2852	4168	3651	2360	2653	9730	9996	5301	2771	4005	3618	2271	1894	2108	863	979	805	574
362.633	7851	7451	6496	2878	2387	4779	2043	1925	2343	970	1127	800	942	744	851	707	657	789	5933	6720	7237	7227	6377	6144	4727	5144	3572	4010	2855	4702	2722	3735	4112	2929	2509	2189	7866	8362	5622	2823	3949	4332	2159	2375	2159	838	1116	884	642
364.633	7645	7596	5813	3099	2607	4726	2151	2217	2305	1025	1234	742	901	703	926	664	624	618	6771	6572	6531	5143	5834	3862	4505	5263	3905	2918	4041	3909	3484	3978	4172	4455	2128	2432	8691	9818	6208	3145	3774	3511	2257	2505	2218	952	1033	902	548
366.633	7581	6820	6083	2673	2517	4317	2071	2017	2386	991	1047	743	918	665	838	738	690	638	6184	7103	6040	6447	5345	5636	3711	5276	4124	5244	3892	3817	3356	3238	2677	2923	2549	2676	9738	9255	6423	3084	3765	3768	2234	2599	2014	959	1121	1026	538
368.633	7410	6611	6146	3185	2718	3631	2091	2334	2315	970	1087	805	934	752	901	586	671	577	6483	7458	6196	5360	6332	6133	4001	6084	4221	2542	4058	3853	3470	3917	3870	2876	2154	3129	11500	10477	5564	3296	3974	4531	2409	2259	2172	910	1249	1074	809
370.633	8643	8238	5942	3035	2604	4376	2130	2025	2420	1015	1144	742	995	665	995	700	668	763	6849	7949	6897	6869	7810	7200	3481	6382	3208	3458	3865	4952	3111	3814	4284	3792	2815	2757	9718	8906	6458	3343	3979	4656	2253	2303	2299	897	1143	1116	628
372.633	7903	8146	6438	3420	2669	3951	2123	2221	2546	1698	1057	817	937	642	963	649	742	805	6113	9077	6693	5822	6895	5344	5081	6642	4249	3446	3192	4508	3478	4063	4534	4035	2714	2391	11118	11153	6844	3441	3875	4220	2458	2766	2376	1026	1286	818	676
374.633	8834	7181	6539	2938	2604	5332	2249	2243	2624	1002	1209	716	995	709	869	679	631	691	6825	8501	6163	5486	6273	7587	4360	4981	4378	2790	4632	3968	3114	2908	4373	3871	2582	2785	11548	10975	6929	3455	4547	4939	2409	2425	2356	979	1169	828	848
376.633	9272	8208	6675	3351	2629	4718	2450	2544	2590	1353	1222	861	1064	694	997	686	650	673	5986	7865	6431	5827	6182	4939	3522	3951	4439	2893	4145	2968	2415	3386	4434	3893	2490	2844	10124	11367	7113	3520	4458	4148	2662	2524	2561	988	1325	899	739
378.633	9472	7905	7260	3761	2832	5192	2431	2385	2777	1022	1222	817	1043	619	937	608	749	638	6814	7675	6632	6867	6860	3845	4686	6135	4218	4648	4216	3400	4763	3980	4656	3746	2317	2511	9082	10912	5885	3648	4217	3839	2655	2445	2571	1079	1198	903	712
380.633	7490	8890	7624	3632	3119	5449	2421	2721	2780	1119	1250	834	1075	789	962	731	681	733	6768	8951	6884	5912	6982	4181	4887	6258	4614	3011	3104	2804	2373	4098	3818	4776	2817	2126	8809	10755	7244	3616	4621	4664	2567	2448	2603	1173	1285	828	605
382.633	8054	8140	7150	3840	2954	4408	2291	2419	2685	2113	1434	871	1185	806	968	745	669	850	7742	7539	6899	6639	7074	5594	4972	5421	3457	5602	4509	5270	3753	3599	3876	4501	2658	2658	9249	11028	6942	3727	4620	3965	2632	2698	2726	1226	1378	876	845
384.633	8223	8646	7263	3805	2903	5608	2558	2802	2865	1148	1392	901	1040	701	981	756	700	687	7557	8084	7321	5762	6440	4408	4736	7044	4861	2933	3747	4810	4908	4015	4684	4624	2378	2669	9136	12070	7403	3865	4753	4648	2849	2864	2636	1071	1322	1097	674
386.633	8998	9155	7385	3837	3121	4019	2582	2722	2960	1238	1325	901	1000	811	980	709	673	698	7542	8058	6854	6887	6544	5227	4799	5801	3876	4566	4872	4537	3973	3264	4848	3519	3377	2650	11756	13031	7857	3822	4630	5185	2893	2657	2686	1088	1303	1173	690
388.633	9768	9290	8062	3940	3178	4849	2633	2759	2998	1233	1491	887	1232	812	1057	793	746	711	7636	10036	7124	8025	6811	4591	4172	5857	3387	3096	4328	4422	4775	3996	3958	4649	2507	2361	10822	12751	8094	4000	4843	5121	3018	2639	2764	1071	1344	850	628
390.633	8524	9258	8385	3784	3295	6077	2751	2832	3070	1201	1437	943	1184	840	958	760	775	786	7419	7658	7631	8342	7455	5147	3938	6409	4332	4511	4355	3362	4165	4706	2641	4359	2522	2850	10553	11780	7408	3983	4556	5020	3089	3057	2796	1203	1352	1054	788
392.633	10125	8834	7914	4010	3373	5166	2736	2447	3045	1242	1518	800	1188	750	1017	747	744	754	6029	7890	7018	8287	6875	7411	3873	7317	4295	4716	4168	3387	2558	4052	4830	3791	2357	3174	10135	11255	7991	3969	4987	5314	3048	3001	2647	1208	1533	998	670
394.633	10864	9779	8322	4065	3382	5836	2837	2629	2867	1206	1433	929	1139	802	1083	770	743	793	8038	8983	7050	7569	7190	5423	4565	5894	5044	3171	3362	3713	2666	4312	4632	4379	3734	3537	9085	11765	6577	4256	5399	5137	3032	2898	2796	1207	1454	1161	770
396.633	10895	10270	8204	4263	3149	6279	2795	2988	3280	1203	1421	978	1345	779	1038	710	738	710	8021	9589	7669	7510	6480	4657	4286	4476	4976	3177	3936	4219	4164	3532	2795	3630	3763	3556	9351	12717	8200	4175	4639	5391	3111	2607	2916	1174	1472	989	641
398.633	10860	9965	9076	4291	3507	5215	2877	3201	3289	1195	1458	951	1324	854	1151	835	789	764	8611	9177	7368	6787	6135	7986	5532	6458	3402	4775	4730	3503	3369	3553	5197	4458	3877	3317	12255	10833	7083	4073	5583	5504	3424	3178	2855	1247	1541	1083	569
400.633	11053	9895	9066	4327	3419	6023	2984	2703	3272	1230	1572	911	1252	782	1027	820	743	932	7669	8864	7214	7384	6431	7255	4352	5552	3696	4215	4614	5146	3898	4248	4828	4812	3291	2605	9846	13369	9011	4347	5355	4494	3259	3180	2716	1272	1424	935	699
402.633	11524	9968	8999	4527	3526	6981	3132	2691	3355	1333	1539	1010	1342	870	1114	888	799	789	6640	7737	7878	6515	7206	4696	4375	4293	5171	3388	3546	5154	5831	3708	4889	3610	3989	3916	14396	13827	8787	4597	5544	5573	3292	3239	2985	1373	1446	1182	834
404.633	12061	9058	9141	4494	3791	6804	3119	3271	3494	1266	1514	1016	1264	715	1033	740	743	776	8377	8622	7363	7564	7954	4616	5354	7749	3807	5323	3536	5394	5172	3838	4671	4466	3008	3182	12820	12391	7879	4522	6005	5884	3483	3625	3030	1454	1541	1166	718
406.633	11929	10302	9335	3839	3851	5505	3137	3196	3613	1370	1395	1050	1289	896	1148	716	749	850	6629	11069	7193	6579	8638	4207	5220	6422	4647	4407	4179	5725	3236	4690	5072	5652	2641	3961	9996	14388	7817	4168	5663	5745	3577	3586	3163	1505	1449	1127	878
408.633	10077	9740	8565	5020	3987	7169	3177	3166	3541	1334	1609	984	1244	833	1244	865	884	834	8686	8578	7725	8118	6284	7038	4517	6402	3890	6387	4866	3417	2839	4440	3413	4748	2725	4469	10014	12833	8892	4748	5728	5268	3463	3563	3048	1536	1675	1065	730
410.633	12632	11035	10183	4907	3527	6453	3209	3018	3509	1300	1651	1128	1313	886	1097	912	889	918	8354	7595	7600	7520	6696	4999	4919	6139	5423	6799	5051	4391	4174	4064	3992	4432	2881	3306	10296	13561	9196	4793	5719	5423	3463	3556	3160	1315	1592	1228	891
412.633	10511	11146	9109	5046	3882	5942	3415	3360	3162	2184	1601	1045	1479	907	1317	868	785	939	8264	7663	7921	6746	8950	4617	4565	6429	4774	4778	3715	4355	4130	4981	5097	5371	2590	2733	12217	11537	9291	4602	5547	5906	3745	3392	3475	1358	1536	1127	862
414.633	13241	11744	10319	4715	4285	7528	3405	3770	3894	1319	1585	1023	1395	953	1209	831	787	866	7559	8373	7984	8754	8092	5015	6013	5240	5311	3462	5388	6091	5830	4789	3607	5206	2810	2630	11038	13578	8652	5283	5941	4747	3880	3456	3358	1503	1513	1212	639
416.633	13135	11987	9710	4820	4217	7086	3674	3088	3851	2098	1596	1158	1542	862	1212	851	821	888	8747	7875	7940	7755	7793	7255	6206	5788	5689	4782	5511	6460	5510	4073	3251	5463	3808	4194	10073	15300	9941	5092	5953	6300	3810	3354	3759	1354	1780	1125	701
418.633	11008	11809	10685	5378	4185	5692	3607	3622	3857	1469	1678	1103	1596	985	1290	899	814	933	8478	9178	8524	7951	6588	5605	5318	7511	4183	3234	4209	4356	4953	3351	3261	4949	2940	3089	11719	15679	9083	5288	6398	6234	3790	3570	3411	1530	1544	1147	792
420.633	13154	11594	9820	5468	4258	4705	3632	3530	3998	1622	1616	1133	1511	937	1237	990	946	883	8711	8406	8030	8323	8395	8974	5284	6341	4075	3840	3953	5529	3114	3499	3664	4915	3319	2923	10543	15491	9203	5374	6416	6111	3887	3645	3795	1649	1719	1365	803
422.633	12367	11764	10515	5495	4343	5305	3571	3586	3662	1309	1904	1190	1472	911	1357	908	972	1132	6742	9008	8324	9000	7191	5933	4249	7357	4122	3656	5850	5147	3948	4551	3482	4128	2776	3102	13732	16128	10253	5449	6446	5288	3788	3381	3244	1564	1759	1281	761
424.633	13888	9769	11276	5454	4703	6107	3796	4030	4199	1619	1915	1209	1618	952	1350	891	869	872	8615	9822	8133	7714	7291	7658	4168	6566	6002	3999	5013	4739	3923	4206	3977	3628	2803	3253	11494	15250	10966	5581	5994	6567	4208	3838	3727	1587	1726	1204	825
426.633	14147	12050	10762	5608	4756	5921	3678	3614	3922	1679	1807	1246	1606	1053	1371	891	872	921	6899	8933	7947	7604	8189	9030	4585	7341	4200	3935	5062	4673	3058	4972	5469	4794	2596	3422	13989	16624	8693	5704	6572	6483	4150	3755	3576	1796	1849	1322	796
428.633	14756	11279	11233	5638	4604	6116	4089	3970	4198	1599	2045	1198	1589	1009	1293	963	891	895	9102	9581	8609	8303	8069	6290	4943	7654	4345	5349	4109	3278	4430	4039	3772	5708	2846	2653	13705	15786	8748	5193	6088	6268	4013	4082	3455	1801	1936	1251	851
430.633	14071	12407	11252	5870	5064	7038	3865	4368	3608	1575	1780	1198	1689	1010	1304	976	876	962	9101	8036	8684	8357	8675	5428	5966	8105	4128	5792	4667	4005	6180	4760	5615	5374	3265	3908	12426	16609	11381	4909	6107	6326	4252	4057	3838	1587	1843	1231	810
432.633	14571	12508	11071	4937	4912	5474	3942	3710	4291	1704	1882	1288	1761	1004	1306	932	851	932	8978	9305	8914	8472	8030	5796	4264	8114	6278	6905	4006	6696	5552	4538	3366	5795	3939	3309	15270	15505	10156	6078	6197	6691	3876	4193	3909	1756	1846	1542	893
434.633	14323	12899	11328	6271	4998	8249	4266	3749	4289	1684	1922	1252	1560	1137	1343	954	926	916	7898	10559	8316	8948	7664	5469	5950	6273	6152	4180	5820	3697	7212	3586	4635	5769	3150	2822	11146	13904	10638	5861	6936	6391	4306	4217	3918	1723	1958	1377	714
436.633	12114	13139	11926	5456	5564	6230	4292	4414	4300	1767	2092	1312	1772	1131	1465	977	892	971	9657	8852	8282	9076	9175	4669	5748	7898	6248	5352	5479	5568	3811	3832	3556	4350	2924	3509	14798	16977	10154	5949	6805	6184	4439	4433	4041	1902	1829	1349	1052
438.633	15930	13018	11552	5966	5145	8160	4115	3932	4291	1660	1973	1358	1717	1065	1360	988	1018	1113	6930	9952	8753	7851	8456	9205	6686	5010	6183	4366	4536	3845	6259	4080	5257	4374	3955	2741	14069	16262	9355	6073	6797	6504	4440	3831	3888	1712	1937	1455	858
440.633	15209	12454	11541	5933	4979	5746	4330	4306	4645	1602	2171	1202	1901	1041	1416	1018	964	980	8949	11433	9996	8349	8788	9558	7480	8501	6262	4381	5141	4972	5218	5404	3961	4685	2692	3350	14292	17999	9310	5419	7228	6008	4426	4611	4223	1870	1949	1402	885
442.633	15626	12918	11805	5728	4448	5245	4656	4564	4692	1846	2092	1265	1976	1158	1491	910	853	940	9721	9595	8199	7543	7015	6475	5600	8239	5539	4134	4120	6136	6364	5582	4626	5652	3414	2884	15743	17444	11999	5541	7174	6403	4692	4540	4048	1784	1799	1504	1017
444.633	16029	11736	12911	6205	5500	5187	4464	3636	3969	1728	1958	1294	1931	1085	1428	1051	1093	958	9689	9815	8208	7566	8909	5326	6499	7906	6459	4175	4755	4272	7107	4001	5866	4420	4163	3393	15928	18520	12041	6443	6407	6253	4477	4663	3778	2068	2035	1422	1049
446.633	16068	12651	12600	6585	5397	6805	4560	4055	4768	1782	2107	1332	2041	959	1258	1079	969	1128	9668	9660	9242	8196	7820	8118	4493	5770	6583	4077	5529	5177	3656	4350	4881	5957	4161	4540	13938	14477	10918	6307	7394	7176	4710	4372	4306	1959	2083	1668	1104
448.633	16062	11130	12298	5833	5474	6098	4643	4325	4684	1719	2305	1398	2029	1236	1539	987	1069	1137	8127	9020	9284	8773	7800	7178	6908	5860	6577	5971	4768	5084	3928	5101	3542	5595	5266	5171	18223	18172	11966	6781	7479	6001	5036	4812	4058	1877	2026	1477	868
450.633	16433	11045	9525	6266	5825	7407	4761	4901	4067	3997	2194	1387	1913	1149	1666	1077	1108	968	9183	11264	8667	8954	7549	5445	5670	8179	4499	3707	5169	4173	6622	5168	5648	5379	3609	3178	12091	16753	11854	6611	7086	6562	4543	4448	4453	1921	1675	1522	897
452.633	15099	13111	12326	6759	5702	7059	4926	4660	5107	1958	2117	1360	2066	1189	1648	1092	911	1055	8677	9960	9370	8885	8278	8696	6735	9620	7208	3833	4505	3780	6232	3730	5682	5853	3290	5136	17000	18319	11084	6844	7342	5709	5181	4861	4542	2046	1931	1591	945
454.633	16705	14654	12172	6756	5921	7262	4062	3919	5048	2398	2384	1525	2034	1327	1661	1154	1058	1122	9632	9161	9235	7963	11315	9775	6819	5524	4338	3764	4902	6205	6381	5269	6063	5467	3702	4154	18661	18486	12440	6551	7590	5710	4885	4843	4232	2056	2038	1576	1089
456.633	16078	11340	12518	6586	5946	5542	4901	4430	5247	1834	2277	1483	1865	1378	1771	1058	1124	1138	9814	9331	9274	9875	7587	9904	4886	7379	4563	6848	4197	4537	4109	5265	5949	6709	5359	5409	15700	16872	12552	6170	7338	6777	5114	5030	4889	2055	2157	1570	971
458.633	16019	14465	12503	6828	6001	6055	4950	4744	4969	1974	2277	1367	2257	1366	1721	970	1125	1159	9604	10434	8713	6365	9381	6890	6394	6751	4945	3491	4209	3775	5999	4659	5998	6542	4264	3446	13670	14300	11019	7011	6977	6729	5046	4354	4364	2126	1965	1622	997
460.633	17174	12563	11781	7109	6070	9402	5037	4421	4704	2044	2249	1497	2299	1348	1766	1136	1095	1124	9857	11821	8720	7159	9046	5958	7107	7885	7034	3471	5907	5838	4255	4994	4236	5397	3314	3698	13550	18622	13125	6851	7675	7329	5497	5237	4568	2148	2166	1724	952
462.633	17830	13233	13499	6833	6247	7225	5162	4502	4714	1901	2384	1454	2116	1418	1662	1165	1002	1199	8396	8337	8768	9063	9133	5426	6613	5574	7422	4223	4320	5807	3431	3856	5954	5586	3123	3605	15437	15004	12103	7268	7682	6981	5369	5389	4832	2361	2096	1670	1000
464.633	16127	14785	13712	6990	6388	6252	5362	5623	5378	2171	2578	1465	2115	1438	1761	1054	1074	1125	8053	10000	9594	9244	10010	9619	4639	8406	6897	3621	6472	6923	4762	5312	3542	4875	3087	2756	14433	18536	10473	6831	7694	6470	5434	4953	4490	2168	2280	1665	984
466.633	18046	14826	13410	7493	6429	9622	4841	5820	4431	1992	2430	1635	2406	1421	1684	1188	1100	1128	10884	8123	8931	6783	9773	6327	4802	8173	7314	5574	6631	3867	6782	5109	3422	5566	3089	3189	13044	20173	10140	7505	8169	7261	5495	5145	4653	2238	2309	1647	974
468.633	18748	12886	14952	7494	6351	8046	5448	5650	5459	2135	2252	1600	2403	1252	1864	1007	1136	1091	9838	11204	9757	8750	7906	5879	6993	5041	7203	4080	5661	6495	6544	5660	5665	6610	2832	3219	19166	20331	13187	7375	7224	7356	5339	5164	4528	2310	2262	1690	982
470.633	17924	15489	15012	7121	6376	6728	4986	4706	4844	2489	2479	1478	2352	1253	1863	1245	1230	1159	8370	11198	8936	7607	8948	8149	6124	8145	7385	5745	4241	5411	6201	4696	5540	4485	5811	3598	17582	18448	13268	6726	7986	7361	5770	5583	4707	2013	2373	1658	901
472.633	15610	14611	13269	7640	6221	6774	5352	5459	4479	2499	2610	1742	2100	1471	1826	1205	1079	1213	8848	9365	8990	10110	8953	5858	7500	8956	5739	5377	6358	5505	5088	5078	6331	6786	4198	3450	16318	19414	11326	7646	8023	7414	5729	5169	4448	2323	2201	1795	975
474.633	17316	15302	14982	6353	6712	6276	5446	5880	5826	2098	2751	1730	2364	1495	1634	1256	1216	1289	10228	10845	9258	8309	10160	10182	7561	6087	8046	4504	5966	4400	3720	4574	3480	4461	4361	5623	19117	20377	13600	7765	7724	7809	5097	5477	4897	2225	2340	1906	1120
476.633	15390	15730	13922	6471	6684	7419	5930	4929	5594	2212	2483	1651	2556	1480	1722	1288	1071	1063	9540	8067	9537	7634	7764	5300	8457	8004	8002	4122	3963	5098	6331	4188	3922	4943	3095	5324	14104	20074	12124	7937	7625	7738	5187	4790	5223	2039	2379	1926	1050
478.633	19778	14791	15445	8137	6836	8114	5754	4770	5605	2375	2547	1631	2349	1308	1791	1103	1112	1097	10276	12311	9066	7640	8798	10781	5493	5422	5209	5942	6765	6905	4364	5635	6781	4456	5523	3542	16449	18822	14109	7926	7903	6339	5969	5153	4893	2273	2435	1772	1196
480.633	17862	13978	15106	7833	6999	9221	5682	6219	5694	2541	2885	1676	2305	1655	1802	1347	1354	1337	9937	9665	9703	9388	8346	10269	4894	5170	7403	5035	6511	7988	4292	5599	6507	6517	3962	4133	12827	20096	13785	8002	8480	7275	5990	5519	5124	2348	2435	1788	1004
482.633	18977	15454	15186	7920	6628	7983	5893	5912	6319	2626	2457	1772	2646	1612	1935	1360	1158	1329	10128	10810	9191	8443	11831	7981	5694	7532	7292	4457	4423	6952	4488	4125	5556	4544	3783	5768	13499	19605	14235	8166	8613	7876	5958	4703	5185	2514	2434	1864	1142
484.633	19585	12712	13066	8315	7008	6253	5502	6080	5957	2767	2998	1762	2474	1678	1922	1366	1199	1264	9791	9983	9470	8341	8079	10278	6970	9326	7768	5673	5671	4328	4127	4252	3895	6854	5290	5462	13118	19650	11100	7969	8954	7161	5992	5681	5434	2228	2433	1789	1246
486.633	20126	15450	15798	8259	7280	7064	5573	6713	5646	2414	2921	1707	2634	1447	2044	1293	1143	1323	10707	9439	9339	9409	8137	8447	5739	6849	5010	4068	4685	5459	4444	4486	5543	4835	3985	4933	15421	20900	13958	8210	8809	7001	6172	5348	5485	2364	2448	2124	1039
488.633	20017	15194	15600	7476	7427	9045	6209	6639	5772	2815	2612	1839	2813	1325	2004	1410	1303	1482	9907	11039	9380	7310	11183	5807	6802	9838	4972	4122	6571	4623	8348	6617	6399	5030	4318	3614	15192	21386	14280	8065	8557	6204	5839	5671	5353	2510	2595	2024	1125
490.633	20810	14841	16028	8719	5854	8611	5439	6745	5720	2575	2868	1778	2692	1665	1927	1376	1276	1291	10323	9797	9707	7629	9247	6313	7309	9478	6045	7910	4518	6688	5498	6157	6672	4666	4987	3824	14631	20755	11119	8351	8963	8184	6413	5798	5428	2568	2508	2087	1302
492.633	19846	16098	15916	7976	7521	10381	5214	6398	6488	2437	3213	1994	2947	1698	2198	1187	1282	1485	10344	8768	9490	10224	7511	6577	6155	6617	7672	4313	6105	4821	6644	4867	3974	6321	4153	5392	20576	18262	14204	7251	7868	7887	6315	5505	5564	2611	2429	2066	1252
494.633	18948	15827	13864	8447	7498	6908	6359	5169	6541	2847	2814	1985	2551	1735	1984	1346	1257	1488	10477	12468	9616	8473	9316	6009	5167	9196	7788	3647	5682	7463	6948	4983	6421	6815	3757	4181	15961	20302	13738	8473	7672	7854	6018	6284	5439	2516	2618	2136	1268
496.633	21069	14644	16648	8943	8014	7143	6394	5513	6419	2560	2737	1818	2837	1865	2020	1362	1301	1509	9109	9559	11231	8224	9114	5850	6304	8237	5102	6551	5357	7683	3071	5873	6466	6857	3377	6089	20956	18017	13468	8756	9074	6920	6337	6307	5273	2636	2501	2079	1189
498.633	21602	17003	16609	8773	6961	9637	6682	6273	6761	2526	2834	2033	2805	1820	2068	1527	1412	1297	8937	10694	10397	9355	10217	5960	5558	5508	6595	4328	7100	6192	4606	5438	4261	6400	3666	6035	20703	21161	12537	8609	9082	7976	5891	6214	5697	2747	2590	2191	1193
500.633	20703	15304	15512	8247	7808	10331	6834	5517	6585	2446	2910	2076	2939	1825	2172	1399	1340	1515	8811	10979	9941	7849	9843	10866	7625	6341	6117	5832	5515	6630	6608	6124	6710	5644	3707	3848	14389	20911	11744	8241	8817	7279	6575	6467	5330	2853	2588	2037	1181
502.633	20391	15390	17127	9068	7912	7758	5949	6729	6243	3350	3297	1934	2818	1768	2216	1432	1352	1412	9181	9921	10196	7754	9123	9813	7210	9399	7944	5766	7084	5950	6848	6305	6454	6656	3847	3678	19579	22268	12903	8954	8800	7648	6603	6012	5892	2742	2707	2188	1232
504.633	20787	17198	14697	9024	7981	8520	5997	5856	6910	2842	3373	2086	2932	1824	1979	1610	1409	1329	10358	9562	10368	8362	8614	8594	7826	6778	6860	6088	7138	6946	7562	4424	4410	6742	3338	6007	15008	22304	14377	8984	9110	7694	6846	6650	5749	2750	2456	2191	1262
506.633	16806	16574	16255	9220	7193	8177	6763	6506	7107	3171	3029	1820	3016	1857	2216	1514	1283	1480	11614	11203	9750	7875	8561	6634	6061	5433	5137	6612	5288	4065	4619	4135	3940	5634	4080	4926	18963	22279	15246	9016	8683	8538	7047	6321	4915	2710	2755	2326	1281
508.633	22582	17376	16661	9445	7655	6727	7377	6322	5752	2741	2794	2442	2955	2029	2224	1536	1287	1789	8936	13940	10581	9429	9107	10984	5384	10728	6097	5333	7042	8317	7582	5312	6527	5027	3973	3918	19723	22195	14587	9116	9030	6546	7090	6668	5784	2709	2794	2130	1198
510.633	22475	17061	16805	9450	7779	6607	6744	6531	6567	2860	3221	2102	3382	1910	1881	1645	1462	1612	10957	11371	9480	8543	8978	10312	5125	5162	8223	5387	8271	4186	4022	5884	6215	5610	6175	4594	17336	24064	15742	9160	9541	8171	7193	6788	5636	2995	2716	2222	1222
512.633	20818	15445	17496	8174	7788	10360	7181	6112	5713	2750	2975	2248	3247	2001	2144	1672	1437	1464	9169	12982	10849	8601	10640	6561	7176	7377	5148	5812	6951	5390	7813	5221	6492	6362	5718	3832	21970	21580	15115	9200	8204	8680	7388	6192	5543	2753	2700	2168	1260
514.633	22486	17531	13588	9425	8078	8045	6742	7145	6906	3396	3048	2309	3286	2039	2136	1541	1355	1529	10874	12770	10386	9775	8432	5183	7390	7148	8567	4311	7082	8014	7744	5239	6441	5319	3681	5917	16182	22498	12912	8240	9366	8460	6599	7070	5211	2840	2882	2087	1365
516.633	22193	16386	16662	7574	8486	9393	7495	7273	6997	3750	3440	2176	3121	2061	2313	1559	1520	1548	9988	11073	9929	7987	8046	11118	7921	7476	7827	4539	7230	4721	5664	6007	7295	4675	5002	3602	14605	20781	15949	8831	8642	8372	7285	6429	5796	3102	2822	2331	1333
518.633	21475	17738	17752	9186	8607	11151	7603	7914	5574	3346	3376	2095	3203	2059	2243	1686	1274	1435	10888	11885	9700	10918	9576	10656	8081	10352	5609	4860	6277	7866	6908	5367	6628	5308	3535	6595	21078	22250	16057	8707	9338	7951	6245	6165	6005	2979	2864	2216	1430
520.633	23513	14788	17442	9974	7459	7922	7657	8144	7110	2818	3512	2281	3268	2020	2298	1695	1436	2106	10984	10594	10340	11030	10690	11491	8456	8895	6773	4510	4517	7011	8335	5901	6645	4684	6551	4160	18140	22398	14279	7806	10061	8619	7284	6910	6025	2413	2670	2212	1414
522.633	18650	18014	17444	9844	8471	10974	7594	6700	7395	3448	3083	2364	3636	1867	2475	1779	1583	1750	10894	13540	10534	7129	11335	7202	4689	8597	8824	5293	6928	5803	7057	6407	5185	5604	3524	5024	15306	19667	13535	9573	10284	8044	7214	6045	5754	2866	3021	2251	1254
524.633	23779	18157	16752	9918	8545	7689	6386	7416	7687	2907	3292	2392	3485	2068	2395	1660	1397	1932	9450	11130	10694	10884	11664	6326	7518	9141	8619	5990	5019	5964	6677	5346	4247	6440	5464	5923	21280	18427	13157	9365	8910	8310	7626	6808	5893	3086	3075	2453	1415
526.633	18579	18738	18436	9813	8872	10180	8034	6913	6248	3248	3698	2445	3302	2199	2290	1746	1502	1658	9341	8899	9915	10860	9586	10810	7324	6765	8629	4362	7236	8648	6419	6783	6358	7256	3550	6223	15773	23162	13862	9714	8988	8604	7689	6997	5967	3087	2854	2190	1547
528.633	23946	14662	18631	9945	8890	12088	7754	8192	7525	3334	3147	2360	3487	2258	2464	1874	1618	1615	10705	9858	10849	8858	10102	7006	5621	10402	8247	6834	7559	7518	3375	4882	6275	6188	3556	4215	17486	23539	14636	9785	9325	8494	7820	6505	5758	3124	3112	2511	1326
530.633	23506	18498	17324	10409	8660	10073	7492	7830	7631	3620	3349	2482	3869	2378	2488	1602	1532	1570	11615	11524	10795	9564	8277	8295	4732	5644	6106	4509	7982	7840	6566	6241	7558	5472	3470	4970	18510	21092	15614	9649	10361	8896	7881	6769	6092	2645	3064	2197	1449
532.633	22090	14377	17466	10479	8921	12308	7699	7607	7398	3190	3286	2362	3431	2390	2640	1386	1572	1667	11591	10715	10703	7906	8991	5818	5149	6552	6698	4839	7507	5958	7655	4571	7105	5317	4769	5706	19350	17917	13489	9150	8776	7852	7586	7215	5632	3177	2601	2420	1469
534.633	23699	14723	18158	9455	9102	12684	7617	7792	7160	3549	3916	2660	3375	2100	2452	1896	1522	1636	11369	12201	9909	9138	10210	11524	8939	8128	6916	6512	6318	7503	5524	6906	6988	7771	3801	4048	18968	22574	16351	9336	9373	8305	7918	7130	6286	3277	2714	2368	1461
536.633	22512	18025	18230	10264	8564	10628	8022	8049	7580	3242	3441	2469	4123	2348	2645	1848	1508	1748	8044	11887	10545	10618	10568	6042	7921	9543	8375	4675	5979	6501	7985	6222	4228	6293	5629	3813	18394	23623	15123	9854	9447	6699	7754	7697	6133	3358	3166	2454	1677
538.633	24165	19200	18723	10652	8289	9098	8446	7650	7882	3604	3739	2502	3942	2494	2567	1651	1542	1538	10272	12242	10474	10905	9826	8923	7938	10205	9053	8852	5121	6682	9121	5391	5427	6704	5300	4508	22268	18649	13445	10032	9201	6606	7571	6734	6637	3028	3026	2370	1321
540.633	23226	14157	19764	9828	8736	13033	8431	6830	8000	3340	3563	2700	3718	2396	2659	1895	1752	1846	12542	11481	10235	8496	8590	11089	8979	11524	5474	4981	6831	4285	4486	6006	5089	7755	3765	5693	21391	24401	16778	10327	9827	8044	7917	6286	5932	3253	3079	2681	1527
542.633	24320	19391	19476	10315	8936	8174	8478	8270	7027	4382	3782	2793	3867	2410	2643	2002	1713	1695	10797	12049	10895	9321	9157	6299	6519	9602	7550	4640	8125	6891	4909	6826	7061	5792	3850	4384	20552	25069	16973	10203	10351	8806	8002	6976	5871	2802	3245	2438	1568
544.633	24382	17989	19216	10899	9403	8679	8456	6894	8013	3937	3444	2271	3892	2347	2348	1988	1420	1833	11191	11333	10711	9679	11714	7098	8599	5926	8873	4457	5739	7790	7680	6635	6530	5040	3765	6915	16107	23934	16286	10266	9309	8265	8319	7836	5997	3073	3002	2565	1601
546.633	22872	19446	19915	10284	9739	8876	8409	8775	8156	4107	3826	2503	3830	2471	2790	2191	1611	1848	12008	11736	10482	11119	10446	6265	5446	9167	8810	4854	8746	6774	6855	6706	7241	5951	3669	3903	18927	23926	15530	9788	9094	8756	8188	7665	6573	3446	3102	2750	1480
548.633	25255	17067	18913	11293	8995	13193	7358	8567	8261	3310	3885	2702	3684	2582	2756	2126	1738	1837	11437	11767	10763	9382	11556	8020	6804	5502	9365	5080	7469	6298	7790	4650	7390	5998	5862	5985	16971	21938	16093	10352	8894	8689	8366	7335	6237	3331	3235	2645	1522
550.633	25552	19402	19459	11205	9557	11036	8677	9143	7955	4066	3697	2887	3866	2645	2999	1968	1568	1757	11759	12587	10485	9270	10004	6136	7241	7692	8797	5415	4995	7982	6554	6093	5525	6026	7081	4565	22995	21539	17115	9502	10163	9607	8453	6477	6867	3329	3098	2629	1579
552.633	23039	17341	17070	10918	10093	9310	8799	8345	7139	3409	3697	2702	3788	2541	3013	2064	1988	2129	11769	10687	10405	10978	9678	6463	7900	6212	8740	5196	6287	7968	7886	6713	5798	5615	5016	3728	19831	23462	15727	8954	10801	8709	8537	7405	6416	3213	3305	2592	1556
554.633	21722	16411	18868	10286	8061	7812	8083	7373	8041	4483	3845	2774	3798	2509	2778	2203	1899	1953	12942	11710	10621	9600	8748	6155	4866	12088	6197	6577	8097	7707	4116	6389	5680	5224	3731	6987	21167	25141	14090	10699	10530	9511	8686	7822	6492	3603	3379	2752	1556
556.633	20534	18721	19349	11633	9837	8608	7595	8528	7272	3772	3867	2978	3693	2428	2888	2111	1699	1782	10778	11105	10425	9230	8966	6178	5557	9892	5556	5781	8137	7232	5232	4029	4086	5524	3910	5200	22987	23803	17117	10610	10300	6970	8769	7632	7071	3256	3318	2595	1536
558.633	25331	18750	19707	11583	9543	10797	8813	8908	8194	3718	3716	2764	4292	2584	3248	2012	1826	2026	9277	11459	10919	8772	9135	7920	5427	9762	5784	5577	4954	5602	8579	7338	6567	7329	3787	3981	22653	21983	17010	10877	10558	9369	8648	8038	6646	3372	3425	2771	1607
560.633	24032	19254	20127	11779	9976	10291	9339	8891	8047	3418	3686	2531	4394	2759	2763	2068	1875	1876	10837	11098	10658	11489	9471	6837	9005	7741	6542	5288	4992	5119	5844	5842	4136	7225	3763	3974	17433	25310	16299	10690	10458	9082	8353	6761	6923	3236	3249	2743	1721
562.633	24745	19997	20769	11239	10038	10859	9096	8691	8303	3773	4505	2622	4485	2847	2844	2168	1865	1950	9524	13641	10180	11419	10352	11558	7984	8931	8363	7747	7572	7857	3844	7154	7247	7472	4443	4495	16306	22714	17317	10208	11177	8894	9026	8429	6223	3677	3282	2769	1872
564.633	26178	20229	18136	9845	8445	7718	9310	8554	8468	3966	4226	2993	4617	2834	3036	2312	1795	2146	12101	13294	11651	11705	9261	8263	6421	8371	8929	4853	8677	7464	8610	6605	7501	7683	3931	6396	16919	23826	17565	10840	10148	8853	8422	8046	6829	3613	3490	3007	1494
566.633	26547	19611	20542	11352	9902	10517	9310	8500	8686	4417	3809	3153	4264	2852	2946	2312	1818	1772	11845	12208	11226	7603	10743	6547	8854	5958	9492	4399	8342	5467	3597	6168	7849	8205	3446	3917	22050	25022	16232	8950	10608	8627	8666	7602	6910	3411	3089	2779	1571
568.633	23781	18295	19969	10729	9909	10533	8482	7629	8347	4383	3868	2886	4346	2699	2967	2197	1508	2192	13243	12067	10712	9140	11255	6463	6971	9386	5513	5354	6263	4689	6503	6366	7430	5253	6084	6869	21102	23439	17609	11046	11305	9250	8279	7803	6792	3596	3313	2561	1575
570.633	25701	18731	19880	9886	10486	12067	9439	8666	7550	4527	3831	2861	3918	2794	3376	2100	1702	1940	11704	10000	10561	8247	10391	9454	8185	8451	6044	7455	5835	8461	5257	6503	7505	5552	3759	5094	21093	23220	13395	10674	9805	9344	9446	8422	6578	3641	3428	2867	1858
572.633	25451	17962	17327	11845	7869	13586	9011	9900	8867	5820	4365	3117	4638	2974	3312	2426	1838	2030	10641	12777	11254	8674	9497	6474	8270	9147	9672	7175	5778	9130	3996	4849	7515	7416	6948	3878	26594	22453	14913	11077	10368	9173	8882	7650	7141	3748	3240	2879	1873
574.633	25908	20396	20676	11954	10342	8020	9351	8165	9216	3699	4246	2876	4305	2948	3294	2291	1921	1922	12813	11832	11203	10922	9730	6124	6181	4860	7507	5239	8306	6336	6555	6612	5627	6949	5280	5406	23155	27211	17795	9804	9775	9588	9384	7186	6943	3317	3462	2749	1812
576.633	24877	19400	20212	11703	8930	10289	9821	9637	9292	3883	3782	3051	4614	2979	3145	2419	2167	2145	11353	11132	10873	11942	10413	9141	7260	5908	9786	4718	5657	7772	9307	5662	7791	7923	3820	3562	22866	25549	14235	11129	10590	9267	7950	8664	7247	3268	3352	2626	1727
578.633	23302	19725	21253	12283	10379	6975	10000	6758	7654	4670	4598	2908	4601	3001	3349	2254	1948	2120	9742	10778	10812	7856	10834	7685	6303	12678	5484	5116	6861	5227	8879	5945	7376	8082	3778	6176	19731	23661	17866	10840	10705	9304	9181	7881	6762	3589	3579	2891	1716
580.633	26410	17237	19297	12284	10617	9144	9302	7755	9136	4545	3928	2980	4870	3019	3301	2359	2076	2243	11556	13065	11054	10401	10165	5680	7547	10314	8072	6176	8110	5754	5402	6247	4901	7228	7446	4312	23503	24770	15936	11446	10252	7638	8927	8019	7015	3918	3173	3005	1857
582.633	26746	16093	21453	12331	10683	10051	8517	8619	9224	4343	4820	3079	4420	2975	2933	2445	2090	2214	11626	11962	10647	11945	10020	9221	6636	11342	9441	7549	7361	8336	4257	5804	6702	5697	7591	7104	20707	25469	17733	9220	11032	9547	9137	7875	7324	3389	3524	2849	1890
584.633	26142	20731	21302	11407	9148	10697	9765	8838	9205	3903	4263	3316	4281	3317	3117	2192	1886	1885	11890	11659	11088	8181	11076	8777	9011	6759	6618	4702	9074	5263	6676	6197	4257	6939	6204	5755	18080	25250	16965	11109	11356	8653	9855	8558	6808	3874	3770	2917	1874
586.633	25122	20355	20746	11060	9918	8212	9911	8790	8288	4460	4845	3031	5041	3139	3441	2456	2052	2236	12237	13636	11590	7978	12523	6669	8410	11080	9564	5320	5484	7997	6166	7291	8015	8713	4332	4444	28031	22890	18076	11214	11558	9451	7931	7578	6587	3797	3603	2864	1783
588.633	27678	16865	20339	12288	10687	10838	9977	8597	8552	5250	4568	3203	4647	3112	3574	2499	2206	2196	8980	14637	10888	10964	11438	7589	6521	6942	9079	4649	9474	6289	9009	6600	7534	6552	6996	4037	22680	24546	14275	9970	11001	7344	9720	8374	7009	4119	3568	2997	1886
590.633	26441	20549	21413	12186	10745	9115	9496	8880	9309	4237	5084	3342	4831	3271	3676	2422	2091	2076	13458	10593	10584	10976	10724	6372	5139	11020	9770	8269	5023	8303	8180	5482	7335	6720	4086	5509	23974	25133	17408	11481	10894	9190	9666	9132	6675	4051	3506	2794	1932
592.633	25140	21249	20455	12474	11002	9741	10200	9361	9239	4987	4315	3423	5137	3352	3434	2493	2209	2348	12244	14374	10837	11682	10900	9003	8158	11386	6210	9794	7918	6855	9377	6778	5645	8067	3688	6642	19634	25720	17887	11798	11128	9604	9781	9052	6607	2877	3674	2904	1897
594.633	27166	21271	21422	11910	10358	10400	9477	10182	9091	4245	4245	3365	4948	3285	3459	2530	2214	2116	12236	9777	11044	9545	13616	6831	8933	9671	8520	8047	7296	4826	6208	7302	4229	6846	3577	5640	18640	26596	13860	10325	10991	9438	8391	7985	6502	3411	3789	3019	1778
596.633	26767	20526	22465	11139	8266	13504	10692	10080	9669	4977	4195	3437	4514	2877	3385	2694	2104	2513	11876	10908	11078	10545	10953	5884	9683	8803	9805	5508	6261	7844	6558	6977	5514	8086	5964	3787	25993	26175	15730	11904	10536	8923	9682	8662	7168	3986	3119	3129	1831
598.633	26023	21179	21984	12103	11021	9470	10646	10125	9857	4314	4393	3622	4909	3284	3457	2529	2089	2581	9512	12532	11737	8209	11052	8585	9056	10954	9547	6424	6571	8753	9752	7532	8007	8357	5857	5625	18947	25997	18530	11680	11531	9317	9822	7992	6158	4090	3574	3268	1778
600.633	24619	18913	20450	11322	9403	10167	10720	10914	8925	4333	4705	3210	5012	3230	3630	2470	2182	2284	9915	11529	12060	9825	8937	6744	5500	10515	10955	7454	5539	9318	4961	6054	5509	7131	3850	4401	24433	24740	16401	11004	9963	9335	9793	8188	7251	4043	3817	3218	1719
602.633	23449	15950	20490	12304	10312	10161	10807	10370	9695	4326	5757	3817	5150	3445	3403	2373	2192	2242	12440	12803	12507	11117	10480	6383	7243	12757	6631	4995	6669	5541	4281	5355	7868	6955	3998	4316	22321	24858	17609	12212	11618	9821	9617	8897	7612	3601	3788	3175	1787
604.633	26155	20448	21613	11565	9381	13687	10523	10105	9709	4994	4635	3660	5695	3512	3561	2556	2047	2220	12410	12744	12606	9407	11949	7019	10389	10969	10036	9721	9119	7484	6622	5908	7653	6697	4722	4727	20927	26200	18515	11514	11566	9672	10248	7973	6985	4004	3672	3246	2202
606.633	29461	21028	22294	13292	10483	12950	10872	7969	8564	4625	4431	3614	5884	3358	3572	2668	2350	2300	13409	12562	11179	7849	11445	10510	9161	12435	7298	9628	9013	9575	10439	6037	8182	5936	7792	4008	21704	24419	18764	11336	11844	9706	9401	8519	7703	4085	3239	3230	1930
608.633	22509	21132	19550	12723	11158	14601	10412	8755	9697	5475	5304	3641	5137	2846	3819	2650	2256	2333	12500	11454	11535	11526	9821	11258	7967	10082	8156	5721	8535	9716	8651	7131	5509	8096	6876	5095	23741	26578	17645	12105	11497	9337	10281	8204	7353	4185	3675	3073	1964
610.633	27308	18720	21909	12921	10950	12443	10918	10730	9512	4626	4912	3430	5856	3591	3797	2820	2357	2488	13059	14458	11219	9055	12315	8069	5385	12467	9969	5025	5535	9157	6401	5216	7927	8054	6060	3937	18715	24062	17724	12026	11187	9986	10353	8902	7833	4112	3547	2979	2108
612.633	26864	19262	22775	12353	11341	10907	11289	9622	9814	4335	4524	3765	5009	3608	3640	2575	2166	2509	12603	13437	11847	11540	13162	8005	7344	12830	5529	5383	5270	7733	9452	6799	4439	6101	6916	5365	27279	26452	14439	11769	11462	7864	10079	9489	6751	4183	3690	3234	1973
614.633	26530	21385	21201	11480	11118	9865	11166	9225	9492	4379	5613	3459	5475	3581	3504	2804	2142	2384	11854	13255	12036	9232	9867	7973	5289	10255	10548	4893	7522	8535	4369	7168	7359	7086	3933	4786	24611	24785	18421	12561	11055	9774	10070	9178	7734	4390	3803	3134	1914
616.633	24169	21080	22646	13199	10836	13848	10914	9665	9624	5010	5576	3426	5312	3830	4101	2708	2464	2560	12119	15554	11232	8712	9368	6759	5678	12968	6675	8055	5729	5693	4136	6620	5285	8820	7642	3943	24513	22031	18465	12161	10815	9313	8762	9288	7139	4184	3691	2966	2064
618.633	28373	21856	23381	13152	11251	8912	11450	11226	8753	5645	4760	3762	5429	3745	3674	2825	2373	2384	11871	14652	11387	11114	9667	6919	11149	9374	10786	5431	8652	7722	8939	5708	4386	6768	6282	5039	26473	24957	18663	12548	11603	9461	10051	9164	6472	3896	3948	3306	1870
620.633	24547	18411	22981	13162	11128	9438	10073	11488	9214	5094	5008	3607	5281	3679	3685	2837	2303	2470	9832	11523	11270	11084	13071	11338	5361	6814	10308	9339	9061	5852	9415	6645	4581	7754	5435	4238	19156	25804	17808	11230	10787	9438	10649	8889	6652	3943	4005	3171	1945
622.633	25894	21211	22346	12085	10220	11718	11429	8466	9812	5041	4825	3774	5495	3947	3821	2882	2322	2692	10631	14205	11255	11576	10376	12243	8323	10327	10081	8459	9279	8120	8677	7043	4708	8177	4064	6247	19066	26663	19174	12218	11501	9169	10606	9238	7998	4185	3681	3260	2246
624.633	29817	20226	22257	11883	11228	13519	11191	8579	10222	4660	4683	3674	5971	3872	3363	2850	2579	2709	12442	12510	12265	12324	11919	7281	6226	11407	6124	5202	8657	6903	5549	6130	6018	7220	5489	7268	19332	25361	19292	12429	11701	7559	10823	9475	7854	4450	3893	3266	1857
626.633	29735	18944	22382	12893	10790	13595	10985	11265	9255	6619	5625	3762	5663	3041	3673	3013	2439	2749	12837	14386	11221	9731	11203	6792	9125	7260	6235	5204	9980	4980	6911	6862	8010	5657	6638	4324	22735	23874	16466	12903	11525	9673	10712	9743	7904	3695	3672	3220	1978
628.633	27320	21637	22834	13760	11392	9934	11314	9986	10327	4890	4808	3974	5856	3965	3903	2923	2573	2553	10590	11019	11747	11251	11591	9936	8305	8325	10227	6310	8039	5626	8991	5493	6990	6721	6651	4858	19925	22005	17575	12496	11418	9887	10095	9391	7630	3854	3802	3303	2022
630.633	27208	21802	22595	11856	11701	8400	11392	8351	10556	5148	4880	3791	5212	3750	3816	3093	2494	2981	9650	14708	11688	9135	10758	12182	9769	10746	10396	9098	9383	8408	4225	7073	7877	6708	4341	4275	26524	26747	16310	12913	10903	9479	10962	9666	8258	4359	3772	3309	2315
632.633	27903	21082	22886	12672	11004	12722	10539	11956	10319	4897	5139	3646	5274	3922	3694	2992	2285	2526	12046	12980	11630	10619	11409	6509	9463	11835	6893	5304	7958	5670	6859	7050	5711	8835	3841	4536	19722	26363	18292	12987	11776	9712	10840	8602	8295	3815	3898	3380	2238
634.633	24875	20140	22637	13590	11506	13023	11749	11947	9005	6087	5638	4032	6137	4162	3981	3117	2310	3054	12121	12961	12204	12190	10950	7391	7629	7748	6769	4732	5623	8982	9497	6141	4537	6944	4136	5732	26731	26502	18987	12442	12457	9914	11137	8228	8167	3931	4029	3350	2399
636.633	26990	20025	22184	11750	12269	13945	10225	8923	9740	4954	5462	3902	5279	4008	4029	3199	2271	2593	11809	13351	11809	9395	10916	9534	5952	9871	5816	10285	8890	9005	8756	7958	8261	8933	4337	4657	27601	25186	19807	10778	11726	10012	10872	8860	8089	3897	4024	3383	1956
638.633	26915	19877	21930	12299	11823	12580	9890	10672	10627	6198	4978	4107	6155	4086	4329	3045	2609	2830	12369	14145	12251	9397	10099	11202	9481	11037	11134	6823	8838	6011	8106	5403	7790	6334	3702	4802	22273	21980	18087	12737	12137	9788	11017	9369	7948	4295	3896	3232	2149
640.633	27412	21860	23086	12651	12115	11288	10664	12190	10728	6358	5853	4183	6100	4403	4411	3072	2270	2964	12131	12588	11062	9945	11263	6995	6708	9684	7295	5163	6558	9847	9519	5736	4374	8492	8322	4991	24951	26452	18945	12674	11727	9861	9761	10173	7815	4564	3884	3646	2019
642.633	23757	21869	23509	13660	10520	14582	11480	11925	10236	4734	5824	3691	5795	3653	3976	3238	2751	2553	12822	14928	12463	11729	11576	6321	7395	8722	6453	5733	8575	7850	9051	6288	5913	9053	8039	5106	27478	27360	15496	12768	12050	9934	11330	9144	8098	3811	3831	3553	2211
644.633	27963	19811	23214	14170	12394	12676	12270	10205	10769	6233	6051	3930	6499	3919	3931	3042	2552	3014	12899	13616	11131	12793	8842	9290	6307	10235	8224	10501	8809	4832	5142	6780	4191	7519	6664	5005	22431	23118	16608	12860	10408	10388	10762	9895	8137	4509	3764	3369	2300
646.633	27035	22056	23152	14381	12206	13848	11181	12217	8332	5128	5000	4338	6331	4258	4333	3258	2677	2697	12698	11483	11612	11624	11463	12480	8151	10833	6597	10679	8983	5566	10125	7294	4273	8327	3704	7062	20194	24848	19608	12640	11972	10190	9477	8582	7905	4254	3536	3135	2421
648.633	29117	19212	21657	13950	12396	13189	10932	9694	10240	4920	5703	3942	6309	3176	4276	2962	2712	2552	10422	14785	11232	12461	9549	8334	6048	10118	10407	5283	5780	7961	6043	7116	6491	6744	6858	4398	22550	27013	16806	13005	12701	9871	10477	9686	7956	4743	3870	3675	2181
650.633	31301	20080	22786	13763	12059	12240	12467	12445	10516	4821	5274	3786	6253	4180	4272	3462	2677	2741	12502	12522	11476	9100	9941	8421	9181	11599	10373	10005	8497	8443	4615	5549	6486	7032	5035	4348	19797	27470	18654	12595	12094	9350	11561	10390	8423	3736	4163	3602	2193
652.633	26500	22870	22216	13999	12475	7815	12674	11743	10884	5659	5586	4574	6030	4034	4410	3262	2372	3196	10276	13771	11670	11049	10389	6545	7187	10765	10278	4881	6300	7828	3387	7578	5507	8395	3861	6134	23415	25098	16797	13057	11868	10342	11721	10565	8361	4676	4183	3528	2486
654.633	29780	21317	19308	13884	12464	8413	12343	10344	10830	5089	5876	4251	6280	4340	3986	2808	2696	2834	13493	12608	11629	9464	10104	10207	8829	11548	10492	4995	8798	4765	9279	7378	6632	6716	7094	4958	27832	25527	19702	13377	11104	10177	9425	9592	7839	4838	4030	3597	2295
656.633	28214	21896	22960	13502	12501	11227	11604	9005	9649	5453	5325	4028	6260	4569	4455	3357	2704	2720	10321	10067	11644	11691	11251	9395	8158	9032	7205	5811	10573	5796	8830	5703	7174	7628	8212	4149	21609	27736	19957	13206	12117	9974	11643	8577	8135	4536	4081	3429	2307
658.633	29958	20687	23560	14762	11045	11333	12749	10707	9793	5887	5950	4303	5323	4558	4436	3350	2542	2798	13623	12691	14532	11267	12915	6490	9873	9517	10970	5070	10687	9948	8868	4990	8128	7095	4189	7968	28055	24750	17415	13145	12014	10809	11702	10143	7672	4213	4166	3715	2254
660.633	29017	22003	21351	14139	11954	10960	12423	9330	10886	6397	5144	4207	7207	4395	4734	3427	2662	3174	12448	13641	13244	9247	10738	13076	8869	6434	10527	8319	9394	4707	9295	6980	6809	9202	4429	7401	22937	23275	18803	13310	12336	10516	11742	8806	8305	4600	3995	3719	2045
662.633	30879	20480	24428	14970	12489	9892	12130	9317	10701	5868	5520	4415	6529	4141	4688	3569	2569	3242	9867	12774	11932	7993	9925	6734	9501	6200	10077	5159	5823	6763	5483	7604	4456	7620	4138	4661	22087	27786	15113	13243	12096	9512	10025	9219	8010	4496	4402	3751	2329
664.633	27484	19340	24266	14355	12262	11508	10395	10638	10565	5671	6249	4467	5925	4603	4711	3280	3019	2993	13958	13902	11671	8812	10919	10452	8633	12221	7965	6582	5398	8640	4307	5572	8341	7101	4566	6199	20805	27322	19450	12918	10913	9618	11619	10545	7908	4557	4062	3727	2398
666.633	28634	22308	23577	14617	12777	8507	12370	12300	10911	5612	6133	4651	6230	4561	4198	3616	2983	2874	12886	10865	11776	11492	9323	12716	9161	13231	7250	6243	6136	9008	7231	6756	7723	6743	4278	4955	24167	27051	17803	13250	12969	10591	12090	9777	8035	4359	4297	3756	2309
668.633	27296	22905	24671	14949	13162	14291	12307	12535	10229	6041	5337	4617	6763	4303	4770	3518	2835	2610	12655	11449	11621	8897	11581	11239	6202	11932	6186	6198	9524	9813	6013	7361	4619	7809	5436	4760	21682	24181	15861	13353	11716	9964	11692	8741	8240	4119	4328	3645	2331
670.633	26551	19732	22598	15145	12385	14189	12485	12906	9730	6431	5634	4538	6262	3670	4670	3269	2988	2664	13115	15937	11419	13753	11817	12211	6320	8297	10618	5914	8522	6920	6114	6310	4391	8759	4552	3982	27738	27170	19202	12257	10909	10148	11559	8956	8600	4757	4028	3686	2407
672.633	29196	19535	24382	13152	12570	7427	12571	10266	10266	6411	5318	4728	6028	4253	4747	3461	2919	3025	12823	14829	11355	10633	10352	7028	7177	11864	9246	8735	7508	8676	6718	7370	4647	7638	4181	6646	27921	25376	16599	12828	12832	10610	12246	9863	8528	4495	4510	3992	2591
674.633	29404	18007	23297	12740	11823	9687	12958	9300	11431	5519	6260	4786	5717	3951	4543	3429	2923	3121	12639	12272	12709	10205	12055	6934	9046	12732	10820	8738	6529	4995	5532	4622	4119	6628	4812	4896	30108	23303	17171	10816	12800	7812	12568	9012	6992	5180	4394	3685	2093
676.633	30342	20324	17744	15201	13079	12847	12270	12488	10622	6895	6637	4235	6844	4083	4763	3306	2633	2825	13357	13998	11790	10061	9837	6757	8857	11474	11623	5172	5269	8291	6257	7331	6805	9004	5986	6039	24754	24850	19186	13402	13169	10437	11724	10614	8180	4753	4197	3852	2216
678.633	30778	23408	23373	14429	13043	12650	11397	9813	10659	6415	5496	4590	7290	4383	4542	3626	3112	2923	13055	14142	12415	10144	12671	10926	8320	10077	11011	4193	5818	5511	8858	5718	5401	8779	8647	5566	28902	26203	19654	13448	12461	10175	12175	9606	8155	4448	4191	3779	2400
680.633	28446	21977	24218	14678	12410	12076	12820	11840	11812	6021	5287	4560	6913	4456	4236	3463	2760	3362	11167	12099	11280	10386	10941	6969	9817	10508	7266	6917	5596	7650	6684	6400	6998	9027	4363	4926	28200	28017	19463	12696	12848	10366	12455	11045	8112	4974	4182	3785	2532
682.633	29390	21473	24036	15235	12758	11303	12909	10679	11639	6595	5507	4808	7302	4865	4565	3521	2994	3021	10219	10720	11666	11770	11320	12993	6654	12022	9911	5224	4939	8476	8417	7478	4447	6384	4106	7274	25866	25380	17019	13452	12134	9522	11968	10300	8634	4322	4191	3746	2367
684.633	27525	22667	20807	14102	12982	14566	13235	12016	11418	6057	5480	4315	7112	3646	4978	3446	3059	2899	12711	13648	12427	10668	10575	6268	10168	11392	8907	5906	9363	9897	7686	6947	6988	9178	4217	5872	22888	26876	19352	13653	12637	10413	12247	10289	8723	4856	4091	3607	2710
686.633	27936	22614	23067	15064	12622	11685	12652	13037	11719	6621	6127	4792	6725	4870	4393	3359	3231	3506	13411	12230	11744	10391	10000	7598	10450	12565	10106	8196	5955	5026	9287	7604	7952	8302	7631	4820	29207	28140	19447	12875	12285	10345	12413	9348	8457	5043	4266	3434	2591
688.633	32102	21514	23735	13790	13266	14329	12470	12077	11647	6385	6088	4813	7109	4880	4856	3821	2927	3379	13261	11744	12020	11029	12264	6986	9498	13452	8692	7069	8493	10510	9308	7787	5145	8689	8593	8251	21496	25565	18327	13363	12710	10064	11742	9238	8115	4899	4332	3893	2578
690.633	28129	22570	24241	15331	13177	11680	11543	13195	11234	7204	5878	4811	7015	4398	4671	3636	3301	3184	10230	11852	11713	8978	10734	7451	7973	7866	11564	5388	7660	6068	7649	4896	7889	9390	4320	5292	23216	26015	19733	14092	12752	11089	12535	10290	8216	4992	4271	3805	2566
692.633	26699	17176	23590	14441	13219	10799	13159	11899	11504	6915	6215	4607	7820	4842	4515	3563	3007	3162	10471	15854	12162	9885	11198	7245	8610	12639	6055	8949	9237	7404	9677	5826	7171	8440	7433	6660	28333	28262	19520	12447	11822	10335	12344	8543	8277	5003	4378	3593	2613
694.633	30342	21364	23668	15125	10482	15454	13294	12428	11491	5999	5662	4776	7787	5150	4996	3646	3312	3402	11748	13892	11799	8854	13259	8318	6584	11218	10684	4797	8123	7841	8951	7327	6637	7332	6248	5318	24393	25981	19656	13708	11888	9691	12369	8983	7832	4876	4260	3809	2452
696.633	32640	20192	24965	15523	13082	13988	13597	11405	11293	6258	6474	5243	6766	5274	4878	3940	3155	3008	9444	13958	11981	9194	11461	7787	5899	8703	6216	8428	10343	9401	6533	7777	8503	8770	7817	7953	26499	27515	20175	14185	12728	10581	12541	10955	8251	5112	4600	3879	2673
698.633	29959	20484	21824	15135	13019	11656	14058	11664	11434	6060	5668	4777	7468	4606	4609	3972	3131	3244	13153	11753	13330	12469	12482	6427	6752	10626	6266	5257	5748	6193	4616	7345	8113	8329	7242	5925	29843	28163	20055	13987	11916	9118	12773	10651	8691	4720	4078	3826	2636
700.633	30019	21071	22880	15344	13351	12769	13647	13496	11662	7367	5517	5424	7214	5398	4739	3890	3167	3231	12550	11516	12658	12148	11472	6798	6949	8016	6299	9288	7545	8936	7387	7205	8267	8621	4175	6042	31363	27904	19938	13753	12459	10684	13079	10300	8992	4277	4092	3603	2346
702.633	29190	21403	23970	15255	11162	9927	14045	12586	10643	6112	6811	4781	7346	5085	4722	3720	3142	3543	10977	14583	11547	11970	9776	8456	8958	6688	11668	8723	8808	8136	8576	6716	6951	8500	7470	4994	23368	24625	18997	13919	13056	7888	10640	11628	7645	4482	4150	3849	2354
704.633	29620	22250	24352	15415	13720	13065	13282	13887	11325	7569	6552	4834	7379	5076	5064	4190	2988	3641	13434	14072	11510	11092	9450	7151	9132	13731	7159	9832	9668	9141	4179	7375	7457	8110	3788	5840	26948	25623	20354	13859	13205	10719	12555	9203	8635	4681	4572	4063	2914
706.633	30431	23621	25721	14906	11632	10102	12750	10646	11621	7433	5695	5261	7125	5173	4719	3925	3209	3845	13079	13761	11829	9449	11301	12675	9519	11132	12522	5097	5584	8031	6024	5951	7995	8756	7063	7800	27339	25170	16842	14187	12871	9504	12707	11100	8832	4954	4092	4111	2581
708.633	31271	22782	24834	13287	12985	12048	13411	10077	11605	6434	6843	5239	7794	5318	4854	4095	3177	3024	12855	9696	12507	11781	10434	10311	9410	9830	11351	5289	5720	8181	7656	7393	8268	6691	8678	4956	27345	25536	19399	13558	12774	11123	12976	9145	7478	4904	4237	3711	2555
710.633	30498	23012	24988	15834	13526	10814	14088	12163	12102	6191	5739	5121	7464	5416	5132	4026	3330	3718	12975	13043	11894	13629	11747	10385	8723	6157	6357	6792	6167	8390	10288	5189	4626	8443	6672	5348	21908	28981	20044	14442	12462	9884	11648	10053	8378	5142	3793	4232	2582
712.633	30609	23216	23464	14813	12668	10527	13394	13890	11205	6847	5609	4547	8643	5308	5128	3967	3262	3390	13445	11373	13691	9554	10721	6826	8882	13789	8455	5582	7406	5633	8579	5459	8827	7285	6037	4370	24661	27430	16637	13246	12998	10141	11075	10884	8169	4763	3880	3978	2585
714.633	33341	23200	23348	15381	13484	10225	13566	10090	11913	7179	7369	4689	8151	5313	4433	3889	3479	3299	11480	13236	11528	9133	10525	7111	7780	12456	11335	5968	9202	9586	6161	7997	8684	9196	4405	8316	30909	27128	20111	14404	12763	10770	11797	10783	7744	5208	4005	3993	2321
716.633	32587	18579	22306	13997	12216	13989	14176	13793	12259	7035	6031	4586	7750	5089	4592	4017	2966	3771	11405	13793	11629	10842	12450	7098	8969	6866	11533	5327	10838	7995	10035	6040	8451	8325	6016	5667	27825	28314	18435	14206	13519	10484	13139	11586	7968	5049	4401	4315	3040
718.633	27864	23516	24072	16241	12466	12930	12801	10065	12371	6956	5971	5062	7568	4945	5021	4142	3247	3441	13687	13337	12744	12801	10434	7178	8908	8299	11971	5701	8443	7359	8795	7984	8224	8017	4150	5905	22701	27770	20427	13920	11660	10502	12527	10802	8482	4585	3841	3514	2665
720.633	30480	20176	24773	15756	13413	14695	13797	13584	11899	5910	7167	5113	7132	5498	4880	4355	3324	3893	12476	10945	13337	12174	12395	7610	8561	12183	11126	11151	8113	6259	8185	7201	8202	7994	7564	8460	30239	28948	17863	14267	13553	10857	12827	10908	8697	5032	4444	3872	2531
722.633	33154	22160	25179	13619	12791	12426	13979	13468	12237	6456	6536	4873	7250	5616	4795	4140	3527	3183	11296	13308	13627	9913	9620	7239	7904	11786	7241	8723	9717	6920	9528	5087	8845	6295	4363	4786	30121	27327	19464	14086	12883	11049	12648	11752	9198	5048	4694	4298	2793
724.633	30949	16078	24219	15717	12813	14105	13620	10314	12260	6958	6158	4651	8837	5154	5233	4284	2838	2998	11759	13276	13165	8965	13116	7392	9474	14040	11174	8825	5892	8638	5318	6399	7590	8232	4687	5744	30030	24400	19158	14222	12982	7765	12049	10700	7929	4717	4162	4062	2743
726.633	33393	23453	25815	16194	12917	9173	14577	11450	10839	6351	6468	5027	7114	5661	5055	4117	3678	3451	13431	14534	13588	10268	11772	7380	5806	10865	9890	5421	6149	10034	6848	7600	8469	9072	4182	4680	30050	27258	20340	14436	13199	7961	13137	10284	9086	5341	4522	4304	2599
728.633	29331	21214	25961	15033	13838	15748	14135	13151	11997	6168	7169	5536	8110	5723	5496	3707	3325	3310	10015	13037	12748	13425	14177	6958	10555	12532	6158	6543	8519	10273	6662	7820	8023	9340	4696	8030	31333	30233	17817	13087	11665	10970	13455	10732	7382	5094	4573	4040	2772
730.633	28674	20060	24941	15927	12214	11820	14576	12198	12189	6741	6268	4944	7929	4524	4674	3520	3636	3560	13673	13321	12277	9898	13441	7278	7732	11442	6387	4977	8782	9650	6239	7462	7877	9365	5237	8440	21571	28822	16938	14077	12401	10001	12796	10822	8348	5293	4510	4044	2625
732.633	29135	22656	23703	13780	12353	15437	14370	14052	12621	7058	6255	5345	8179	5421	4876	4219	3712	2858	12846	13703	13296	10554	12126	10925	9007	11425	6173	6134	5894	6352	8510	7835	6661	8285	4278	5689	31115	28399	20331	13547	13600	10775	12076	10852	9032	5445	4478	4261	2721
734.633	26126	23272	23854	16116	12939	10595	14098	12084	12008	9829	7125	5489	8599	5599	5493	4460	3563	3039	9916	13490	13026	9197	11153	6424	9169	9962	6075	9250	5923	7216	5788	7875	7005	7509	8780	4475	30373	26533	20894	14611	13337	10421	13641	11931	8775	5372	4590	3951	3222
736.633	30184	22143	24354	16048	14110	9923	12183	11565	10660	7859	6893	5459	8732	6024	5211	4325	3729	3646	10961	11683	12061	9931	10096	8301	5926	6301	8118	11080	6029	7512	7171	6709	8131	9070	4229	4808	31722	28017	19086	13811	13404	9434	13458	9799	8928	5609	4406	3979	2713
738.633	27842	22972	26423	16457	13568	15784	11065	14756	11521	7481	6005	5130	7187	5562	5459	4384	3129	3408	12628	12952	11950	12450	11919	10634	10492	11453	5838	11073	9581	5497	4217	4965	7493	8562	6822	4638	32085	24736	20588	13168	12841	11066	13794	11866	9046	5623	3785	4070	2787
740.633	29863	18206	24467	15819	13218	15785	14840	13893	12683	7972	6708	4972	8246	5469	5643	4499	3689	3695	14584	15517	11031	9101	10499	10743	6529	14490	6444	5565	10941	5612	10315	7334	6570	6634	4108	5547	29827	27069	19706	14222	12189	10740	13715	11255	9107	5455	4756	4122	2594
742.633	29034	22810	25743	16399	13811	12921	14990	13713	11942	6548	6257	5734	8672	6031	5861	4295	3661	4167	12932	13986	12065	9835	12404	7887	9623	8852	6607	8280	7155	10451	8828	7509	4653	7892	4770	6403	29805	28112	19795	13856	13184	10746	13062	11151	8156	5586	4698	4092	2861
744.633	30091	21079	24191	16329	14305	10089	12647	14130	12527	8082	6190	4915	8713	5681	5459	4408	3687	3460	14595	12799	12730	12458	11821	6863	10003	14522	11558	5647	8473	9871	9144	6318	8678	9377	3826	4802	28948	26083	16799	14257	13629	11138	13808	10235	8283	5515	4603	4031	2435
746.633	33184	22642	23920	15993	13673	12040	13921	14741	12423	6749	6202	5271	7991	5979	5575	4503	3544	3714	12379	17299	12616	12505	10394	7016	6026	11034	11484	8920	9975	6464	6026	7683	7194	9297	4010	8591	29971	28399	16996	14460	12931	10292	13306	10867	9111	4899	3935	4483	2829
748.633	30428	19675	24205	14718	11818	15014	15099	14738	11950	7824	6226	5238	8666	5622	5800	4334	3503	4032	10924	13897	12772	12971	10382	8197	9092	11630	9527	5336	7972	7135	9710	7878	5214	7936	5343	8506	30779	28535	20784	14203	13953	11127	13523	11135	9345	5535	4552	4358	2896
750.633	32447	22383	23987	16798	13187	10058	14613	12021	13011	6992	6923	5773	8705	6136	5297	4571	3747	3484	13465	13682	13023	10597	9734	9299	8818	13816	11532	6328	6372	8130	5134	7826	4384	8260	6731	4957	29143	28365	20816	14679	12150	10660	13928	11213	9257	4707	4622	4421	2915
752.633	29539	19601	23383	15174	13664	12602	14700	10423	11913	7109	7357	5512	8741	6014	5538	4314	3386	3421	11440	14255	12262	10572	10399	13916	10032	13227	9240	5609	8219	10512	10397	6264	8183	8157	4455	5327	31570	25265	20821	14868	13687	10911	13782	12116	8823	5435	4461	4247	3056
754.633	29387	23404	25339	17064	13966	11405	13676	12704	12577	7673	6240	5624	9025	6204	5895	4275	3761	3478	13371	13394	12372	11225	10532	10005	10546	10469	11578	8023	9697	8976	4099	7488	8295	8014	4655	4355	29544	24778	17653	14324	13372	10310	13465	12347	9380	5367	4663	3983	2861
756.633	27774	22386	23886	17548	13984	11058	14703	11433	11084	7277	6426	5447	9456	4940	4861	4464	3601	3619	14950	13394	11931	10008	11487	7004	6537	11788	11643	7395	10909	7456	6931	8156	8354	6743	4199	6475	25010	27321	20197	14671	13733	10164	13762	11277	9468	4781	4680	3806	3073
758.633	33661	22745	24903	16833	14006	13683	14977	11402	12653	7918	6124	5417	8916	6068	5480	4622	3972	3505	13456	14333	13323	9837	9768	8426	7500	11420	8727	5786	7366	9658	9825	7530	8491	7782	8836	7443	26556	28486	16774	14680	13259	10670	13880	11837	8571	5162	4164	4229	2894
760.633	29601	24055	26017	16437	14896	13493	12909	12571	12079	7028	6333	5901	8187	6269	5426	4819	3827	3740	10395	14614	12832	9502	11449	6789	6949	10975	12858	5296	10627	10195	4859	7089	7934	7824	7762	6608	30818	25663	20556	12839	11964	11025	12161	9818	9537	5652	4714	4236	3033
762.633	28868	23138	25803	17892	14393	10058	12119	13426	12467	8780	7240	5553	8709	6234	6130	4464	3929	3543	13825	13656	12295	12319	13437	7775	9737	7518	6107	5561	9525	6870	7251	7886	7711	7576	4680	4667	31954	22135	20572	14612	13730	11145	13984	10542	9051	5320	4290	4398	3112
764.633	32450	23354	20852	16837	13536	14649	15362	13470	10632	8058	7322	5407	8379	6125	6167	4643	3709	3713	13427	14237	13830	13692	12373	13365	6643	9328	6379	7973	6221	5478	7006	6039	8355	7949	9377	6874	31800	27934	20344	14104	13739	11093	14150	9801	8619	5302	4687	4543	2857
766.633	26522	23310	26953	17013	14152	10076	12551	13881	12183	7466	6343	5014	9278	6414	5789	4899	3925	4013	10732	16106	12043	7274	12174	12795	9304	10682	11434	5202	9119	6023	8191	8132	7297	8834	8333	4810	30331	29110	20082	14238	14097	10614	14317	11213	9223	5678	4730	4438	2696
768.633	31990	23504	25045	16198	13460	9052	14924	14764	10303	7010	7644	5970	8444	6395	6094	3934	3808	4301	10601	12076	12896	10710	9940	10841	6910	6275	7536	4953	10719	8976	9652	6054	7956	7311	4499	5122	28200	28604	16390	14547	13918	10486	13988	11700	9196	5055	4927	4191	2695
770.633	32930	23786	24850	17214	14348	13224	15004	11567	12503	9884	7001	6043	9509	6230	6212	4725	3977	3705	12210	17422	12030	9265	10225	7001	5749	8912	6946	5553	6161	10472	7327	8244	4409	9335	3956	4962	24828	27139	21380	13848	12928	10547	13187	11493	8736	5712	4859	4046	3035
772.633	26651	23410	26599	17291	14895	10610	11672	15033	12337	7266	7715	5622	9863	6289	4763	4802	3817	4134	13277	11908	12064	12980	11385	11094	9229	12225	9247	5452	10726	7858	7190	8058	6142	7944	4732	8388	26507	27838	17205	14689	13677	10656	13537	11906	8387	5473	4827	4397	3008
774.633	31812	24810	26789	18024	14392	11634	14860	11847	13080	7415	7521	5831	7932	6419	5817	4554	3650	3453	12593	16749	13202	10999	12283	11270	9162	11095	11728	11722	6448	9627	7494	7191	5510	7606	6964	4976	30690	29644	15154	15286	13459	11516	14016	10393	7712	5577	4478	4141	2347
776.633	34812	20321	23507	16946	14512	14496	15904	15441	12181	7789	6927	5939	9005	6453	6232	4878	3741	3688	13857	14809	12145	13436	11007	8632	10722	12667	6491	4893	7608	8860	4420	6023	7704	8552	8959	5662	24512	27369	20361	14776	13176	11131	13524	12362	8752	5471	4347	4224	2952
778.633	30386	21922	25621	16587	14476	17438	15498	14634	13174	7232	6690	5755	8248	6258	4997	4722	3904	3829	13087	12204	12107	9696	13214	7855	6634	11777	9100	8967	5878	5850	6102	6386	6064	7527	4463	5016	23532	28675	20527	14545	13367	10891	13969	12258	9389	5549	4739	4181	3078
780.633	31777	23047	25348	15385	14408	11844	14353	15486	12593	7270	7059	6130	8353	6403	5182	4864	4163	3973	10561	15217	12970	10592	13156	8198	8804	13302	6975	6485	10334	8242	10030	7666	8690	7794	7337	4999	26383	28176	18008	14714	13602	11487	13634	10928	8488	5703	4383	4425	3066
782.633	29468	21191	26038	16190	14140	16171	11415	14007	12611	7805	7745	6354	9161	5313	5725	5034	3806	4106	13234	12048	12324	11243	9954	7216	8918	9934	13215	9211	10934	10966	7387	6837	7253	8513	8717	6134	26693	28413	17753	15011	11851	8830	14255	10438	8682	5572	4707	4040	2954
784.633	34196	18018	25272	14877	14389	15532	15820	13888	11494	7014	7283	6098	9484	6379	4899	5036	4201	3893	12251	12853	12252	10395	11972	6891	9572	12695	11729	7677	9956	10404	10301	4183	7952	9304	4416	5529	32271	26022	21212	13453	12137	10317	13319	12267	9359	4755	4905	4649	2827
786.633	26256	22383	26159	16617	14042	10033	13438	14107	11739	7575	7733	6302	10255	6681	6405	4790	4107	4551	13130	13942	12677	11553	14180	7118	8881	11806	10340	10724	10390	6135	9660	7831	5280	9522	7971	5206	23571	24703	17917	13305	13166	11162	14076	12433	9427	5891	4828	3902	3064
788.633	31807	18540	26677	16391	14480	10941	12362	11277	12673	8018	7381	6121	9475	6561	5744	4585	3525	3827	13643	12016	12105	11329	10951	7165	9083	11592	11913	7693	9888	8521	7362	7917	4590	8520	4314	4954	28735	29278	20764	14962	12688	10957	14597	10486	7735	6095	3809	4497	3220
790.633	29660	23785	25417	16799	14824	12724	16012	14164	13107	7030	6807	7173	8964	6547	6462	5135	3829	3460	12478	11321	12351	11054	10631	10299	10557	12847	11090	9491	10790	7448	10028	5847	6598	8526	7157	5420	32878	28739	20906	12959	13046	10552	14235	12554	9728	6011	5259	4373	3117
792.633	31594	23693	24744	16380	15580	10695	15929	14197	13341	8132	7337	5491	10307	6200	5943	5213	3845	3901	13707	12328	12522	10901	11460	6688	10898	12522	12800	7028	10951	9818	4396	8273	7518	8697	6976	5710	23127	24423	19807	15517	13716	9863	14621	12393	9768	5723	4744	4493	3160
794.633	25601	20028	26865	17109	14420	13493	14627	13622	13119	9236	7261	5616	8589	6767	5867	5121	4098	4217	13800	14225	12934	10268	11562	7815	7541	11322	7068	5701	10252	5541	6043	7359	8308	8562	9194	4215	28927	26184	20396	14918	14037	11366	14703	12012	8996	5804	4874	4594	3079
796.633	29467	21148	24937	16313	14612	12722	15899	14431	13049	9042	7974	5724	9075	5127	6388	5142	3933	3873	12184	11710	13503	9975	11157	10461	8847	12821	6296	8961	9314	10828	7653	7575	4822	9028	4796	4574	29654	25862	18404	12810	14232	11065	13021	11810	9630	5753	4721	4565	3303
798.633	28125	23564	26318	16603	13803	12286	14373	14261	10163	7360	6794	5913	10271	6779	6196	5208	4135	3696	13923	12371	12327	10223	10935	9175	9297	12248	6399	6027	10092	10028	9293	8532	5005	8856	8901	7304	27876	29457	21549	14879	13870	11524	14043	12945	9523	5612	4702	4647	2755
800.633	31068	22453	27497	16921	14774	10240	16022	12228	13086	8397	7531	6006	10095	6851	6367	4934	4235	4325	13890	13618	12295	11575	12993	8216	9220	11224	12403	11470	6054	9073	6495	8030	8511	8548	4980	8123	31495	23992	20235	14839	13953	9719	14165	11012	9778	5828	5371	4107	3100
802.633	32270	22338	24869	17873	14856	11263	14632	14795	13639	7685	7401	5824	9706	6949	6279	5400	4249	4612	13840	13505	14136	9390	12072	12403	10096	10243	13449	8344	6516	7616	7955	5933	8288	9469	4341	8385	32985	25510	18721	15281	13593	10350	14860	10822	8822	5691	4972	4441	3094
804.633	29386	21761	26236	18591	14932	11373	15561	15493	13138	7344	7576	6556	8801	6869	6471	5229	4353	4158	13882	10886	12082	9519	11501	13730	8761	12467	12130	5919	6364	10439	9320	7052	4455	8779	5505	6034	30354	29582	21429	15360	12581	11502	14463	12073	9090	5695	4595	4268	3141
806.633	31900	20062	23464	18441	13978	16506	15849	12728	12958	7780	6774	6022	9564	6968	6621	5195	4195	4882	13429	13671	13481	10866	10696	13489	7646	10500	6351	5983	7089	9046	3648	6768	6711	8269	4395	9070	32170	29398	19044	13203	12029	10374	12589	11472	8091	5162	4962	4584	3387
808.633	29502	23602	26482	15809	14416	13034	15492	13939	12282	7575	7967	6012	10615	6365	6365	5265	4115	3872	14483	10976	12111	12920	11576	7936	8652	7951	5963	5360	10077	9681	7711	8558	8780	8012	8811	7831	32585	27833	18292	13882	13704	10816	15051	12073	9547	6090	4974	4504	2964
810.633	28797	24404	27104	18111	14950	16278	15653	13036	13483	8609	7490	6207	9218	7006	6039	5374	4436	4324	15295	13157	12690	12815	13368	8560	8995	11907	11640	5911	10775	9624	9927	8693	8282	7611	4874	6843	31679	28418	16937	15152	13517	10834	15176	12098	8596	5477	4834	4441	3352
812.633	34158	22540	24928	17956	14654	15327	14154	14002	12823	8886	9095	6091	8623	6725	6226	4959	4398	4639	14036	14640	12417	12524	11734	10679	7053	8911	11852	8465	11145	9635	4496	6100	5573	8802	9108	7884	28648	28607	16248	12182	13097	11498	14103	12344	9522	5852	4879	4650	3018
814.633	29956	23903	25881	17118	13580	15904	16339	12918	12972	9302	6854	6474	9038	6887	6707	5170	4155	4563	14100	12879	12867	10687	12279	7132	11637	12928	9707	7449	10662	5410	7906	7460	5671	6834	5106	6757	34144	27553	20509	15059	12234	10728	14541	12306	9824	5755	5406	4468	2965
816.633	27904	24531	25825	17811	14357	15157	15418	15388	12931	9304	7842	6002	9767	6511	6317	5499	4424	4212	13550	13131	12242	11006	13547	11127	9443	13481	7168	6519	9328	11018	9730	7127	8277	7699	5897	4983	33186	25183	18341	13647	13231	11313	13169	11499	9653	5297	5153	4069	3508
818.633	25860	19846	26709	18628	15543	16345	15818	11545	13115	9029	7486	6566	10143	7068	5901	5149	4407	3987	10171	14337	12551	12713	11476	12977	9652	9960	8528	11929	11086	8275	8399	6104	7899	8967	4364	8235	26642	25040	19411	15515	13829	9858	15004	12826	9908	5850	4822	4732	3225
820.633	34579	23955	25147	18231	15212	12348	16621	15872	13690	9254	6950	6749	9862	7240	6252	5172	4473	3861	13951	14083	12742	12913	11233	13270	9679	11545	12782	9304	8757	5631	9847	8045	8098	8485	4662	5819	32659	28286	19456	15458	13639	11198	15083	11842	8664	5139	4965	4342	3392
822.633	32257	24512	24440	17839	11516	12774	16483	15414	11863	9289	7995	6423	9685	6939	6606	5119	4527	4505	13624	14150	12225	10195	11954	7382	5977	7597	7459	4859	10018	6400	6253	6660	8633	7595	4502	7497	28996	29620	21274	15251	13873	10250	15011	12338	9866	5967	5200	4454	3042
824.633	34836	23622	27701	17080	14954	11432	16136	14962	12241	7926	8281	5840	10030	7186	6421	5497	4116	3784	14779	13573	12897	11733	11774	8171	6269	10255	12251	9139	7498	9152	10992	7696	5027	6665	8892	8720	27288	26332	21593	14767	12406	12013	14722	13005	9061	5954	4995	4463	3539
826.633	31294	24066	25546	17476	14853	10105	16090	11774	14138	7666	6855	6589	8685	7380	6463	5350	4333	4493	11962	13404	11432	10769	10912	7703	10839	6413	12532	7340	5916	6053	6310	7488	8731	7910	5583	4826	25836	29344	20044	15301	12385	11081	14889	13188	9282	6175	5076	4725	3102
828.633	34944	24217	25250	16525	14881	13553	16176	14862	14122	8824	7658	6372	9882	6831	6437	5319	4356	4139	11252	13322	12473	12363	11771	7690	11978	12347	7301	10982	11472	9344	8016	7908	8067	8982	6890	5204	30349	29092	19907	13313	13316	9449	14678	11426	9071	5949	4983	4541	3400
830.633	30056	25043	26023	17247	14913	10838	16147	12521	12519	9585	7726	6473	9883	6139	6423	4971	4611	4122	11586	12533	11947	12761	12807	12260	10933	11426	12330	6004	7921	7750	9109	7881	8212	9249	8782	7699	32637	29268	16880	14520	12746	11699	14914	10693	9679	5802	4766	4651	3231
832.633	30246	24224	26675	16783	15147	12757	16150	13811	13922	9465	7168	5764	10902	7059	6325	5458	4350	4353	11444	16478	13462	9755	13716	8049	9318	8574	10325	7506	6331	5824	5976	8243	8247	9028	7421	6206	33781	29823	20886	15175	14800	11243	14294	11637	8641	6146	5213	4782	3058
834.633	33327	23926	25490	18088	14150	10953	15782	12930	14368	9859	8210	6286	10750	7207	5744	5106	4388	4555	12019	14731	13276	12823	12218	8019	7689	12072	11398	8681	10138	9957	9759	6389	8406	9338	6611	5705	34005	29158	17794	13901	14570	11074	14938	13099	9896	6055	4907	4528	3083
836.633	29718	23611	26824	17276	14355	12483	15275	12958	13659	9078	7296	6680	9385	7527	6053	5227	4370	4314	13959	13845	13692	11040	11723	10375	10609	13747	6685	9560	11334	10827	7480	7845	4817	9309	4867	5677	32909	28312	20804	15265	12481	11220	15008	10987	9003	6179	5185	4630	3159
838.633	29908	23581	24260	17528	13332	12151	16130	14100	13908	9202	8588	6515	8716	7109	5749	5082	4234	4055	11595	16652	12536	13496	14603	12748	11100	6328	13457	5793	8078	8986	8203	7234	6679	8797	6560	5289	34517	28728	20422	14656	14335	11861	13031	13038	9468	6047	5304	4581	3492
840.633	30880	24505	25643	14564	13962	14338	16760	15500	12379	9198	7620	6655	10607	7056	5851	5428	4639	4298	14589	13226	13175	9405	11380	13180	10287	10309	7478	5881	11496	8906	5219	8582	8420	8026	8458	7706	31683	27514	18810	15205	14590	11555	12067	13351	9398	6287	4872	4377	3331
842.633	29425	25348	28583	16603	11159	13376	14684	15096	12532	8088	7619	6396	10293	7197	6821	5565	4653	3949	10100	14227	12400	11834	14327	8634	10439	12209	10182	11950	8545	10109	10606	7684	7178	9079	4363	8843	31959	26743	17794	15999	14560	11326	15294	10169	8943	6245	4981	4620	3496
844.633	24603	24487	28287	17648	15650	15285	14242	16854	12593	9387	7358	6512	9838	7268	6547	5611	4389	4787	10693	12725	12329	10374	12350	7603	11967	13494	7409	11761	10112	6529	5032	7956	7157	7628	9152	6264	29072	28515	19294	15915	14117	10137	14769	11948	10065	6173	5088	4640	2831
846.633	31828	23726	27057	18353	13626	11202	11884	15346	13747	10187	8317	6505	10548	7272	6584	5564	4554	4182	15139	12780	12558	10395	11022	7430	9914	6725	6946	9172	10511	7363	6381	7288	8429	9407	4700	5006	34303	29525	19814	15589	13982	9782	15528	12312	10129	6392	4769	4744	3389
848.633	32665	19812	20298	15602	14479	13217	14863	11869	11475	9923	7641	6845	11583	7297	6452	5397	4490	4430	14976	11592	12078	10320	11626	7707	11145	8666	12498	6027	10271	8288	11446	8048	8747	8642	4882	7688	27715	29498	21051	15288	14073	11008	15231	12328	10026	6040	5180	4343	3253
850.633	32073	25281	27531	14602	14727	14430	15084	13992	13821	7743	7502	6346	9783	7612	6741	5916	4388	4730	13129	14914	12851	11751	12148	9616	7019	6679	8340	6446	6417	10115	10297	8168	7130	9441	6217	4469	34396	29302	20823	15153	12520	11594	14892	12566	8861	5426	5280	4469	3423
852.633	31941	24869	27215	17516	15032	15370	16350	15723	14005	8240	7626	5872	10289	7354	6464	5646	4816	4601	9942	12592	13562	10131	13010	6880	10582	11133	12268	5477	6429	5820	8007	7739	6306	8789	8011	7010	27401	30451	19962	15733	14838	11153	15044	13705	10240	6094	4953	4499	3507
854.633	28812	23426	27554	16990	15204	15936	16951	15884	13706	8431	8081	6568	11310	7422	7028	5635	4711	3816	14016	16782	12657	13431	11773	10418	9869	14857	12818	6344	10230	7177	6752	8137	8390	7847	4448	7636	24825	29861	16085	14647	14151	11540	15091	10973	9525	6037	4963	5118	3385
856.633	22113	24492	27821	14672	15072	17374	16882	12444	13979	9593	8252	6467	10672	7521	6618	5095	4840	4334	11047	13364	12506	10222	12705	8925	11209	11875	7098	9871	9972	6586	7839	6390	5558	8771	6711	5715	31524	29429	18008	15632	13756	9613	15367	12262	9908	6340	5101	4839	2789
858.633	32082	21646	27498	17856	14805	14009	13485	16701	11756	8588	7689	6635	9867	7452	6300	5542	5012	5006	13321	13000	15013	11153	11968	7871	11729	11641	7751	12124	7766	10710	11735	6943	7006	9420	9489	6132	33565	29311	19538	15359	13699	9784	14085	11384	9622	6419	5185	4786	3399
860.633	28630	24201	26105	17346	15523	11855	17127	16492	12109	10385	8258	6519	10034	7682	6735	5113	4479	5187	13641	14657	14870	9922	12681	11801	8113	13011	12578	5948	6531	6335	6112	8092	8548	8299	4276	4894	34971	29181	19829	14623	14754	11764	12791	10905	9928	6226	5198	4812	3579
862.633	31295	23093	26445	18816	14453	8707	13308	12719	13421	9905	8664	6937	10972	7697	6496	5709	4776	5147	13836	14171	13239	12428	13058	8851	9836	13879	8371	7647	6897	8729	5222	7866	8250	9126	5754	7045	32625	30180	19003	15435	14737	11578	15099	13555	9974	6658	4885	4630	3260
864.633	35512	21572	25282	17203	15151	9943	17314	15989	13815	8900	8728	6377	10409	7504	6219	5972	4906	3864	13335	12620	13662	11672	12053	8268	8408	12109	12598	6587	10366	9748	10836	5684	5216	9492	5753	7107	27211	24404	21158	14685	12648	9121	15259	11009	10173	6484	5104	4850	3422
866.633	29333	21709	26187	19517	15135	13622	15881	14928	12830	8845	8234	6739	10173	7622	5887	5354	4724	5503	13171	15117	14485	12360	11510	11048	10415	14679	6722	7978	10238	9487	4582	7741	6591	9363	6246	6056	33008	25720	19525	15046	12037	11702	15585	13232	9410	5997	5258	4683	2949
868.633	33530	22280	26728	17915	12195	12598	16946	14670	13824	8531	8551	6762	9226	7766	6732	5666	4963	5061	13611	14676	12557	11053	10872	7440	9248	13004	13906	7314	10280	7398	6793	7489	8348	9143	5346	5304	28497	29816	21011	15591	13673	11616	15964	13175	9140	6062	5067	5075	3030
870.633	30495	24194	25926	18065	15072	16036	15477	17113	14084	8414	7689	6860	11069	7507	5703	5702	5037	4789	13300	13165	12548	11333	11330	9348	11469	12838	9285	11779	8931	9909	8039	7847	6896	8727	4453	5485	33215	30734	21635	16180	13223	11031	14250	10796	9930	6275	5526	5021	3325
872.633	30044	24645	25687	19464	15645	11850	17048	15163	14186	8845	8326	6659	9299	6924	5893	5855	4889	5054	14778	13446	12678	11746	12020	7548	8088	13090	7303	9569	9716	9882	5324	6921	6871	7443	4568	6022	29349	29583	17292	15005	12465	11184	15694	10262	9197	6187	5284	4635	3588
874.633	25661	24126	26157	17717	15722	13357	15587	14807	13874	9259	8022	7159	11182	7914	6919	5874	4609	4914	14317	13708	13014	11745	12690	7679	7085	12643	7098	7866	10182	8390	6376	8317	8441	8542	7719	5802	33648	29593	21452	15526	14277	9801	15586	11541	9372	5703	5306	5081	3045
876.633	26973	20024	26663	15421	13989	10183	15848	15400	14045	8640	8794	7241	10389	7804	6504	5944	4973	4531	14377	12495	12203	12529	11033	9148	9347	11119	12466	9751	6317	8825	8971	7047	7787	10200	8360	6459	26337	28110	20940	15491	13729	11000	15709	13259	9214	6109	4971	4992	3501
878.633	31008	23215	24931	19739	15958	14890	16086	15509	13628	9574	7735	6515	11139	7944	6721	6143	4922	5065	14429	13787	12790	10916	13219	14301	11592	10755	8947	6112	6397	9074	10765	7410	6608	8472	7154	8315	34752	30732	21648	14995	14181	10987	14765	13580	9585	6129	5091	5229	3854
880.633	29406	23933	26366	16669	15476	10620	15568	14997	13237	9089	7650	6528	9660	6983	6594	5842	4997	4611	14450	14949	13164	13439	12275	11609	6218	11379	10029	12107	10699	8596	5704	7997	8250	9347	5466	8052	36018	28819	21050	15018	13634	11686	16084	11070	10195	6243	5285	4679	2932
882.633	32825	23052	26064	16880	16160	16320	17750	16636	13923	9352	7809	6652	10934	6281	6053	5849	4572	4202	14548	12398	13622	9636	11802	12768	6645	12014	11728	10883	9765	11094	7177	7058	7155	9611	4594	7225	30340	29688	21233	15044	14455	11464	15194	12454	10221	6469	4871	4845	3629
884.633	32964	22003	27161	17128	14635	10291	17295	13392	13849	8591	7400	6926	9582	7906	7322	6100	5011	4820	14016	12407	12471	12991	13775	12219	11078	11476	6479	7660	10155	8860	10623	7153	8349	9272	8824	5552	34943	29075	20343	15954	14126	11636	15572	12669	9353	6680	5250	4732	3643
886.633	34875	24637	26447	16294	15389	12189	15968	13882	14154	8745	7719	7780	10192	8023	7343	5490	4845	5257	13976	12404	12432	11872	11155	8241	9921	7956	6607	7086	7898	7257	9880	7057	5929	9800	4402	5284	26058	26979	18439	15637	14072	11356	16056	13259	9659	6274	5388	5048	3433
888.633	31997	17376	25174	15438	14674	12995	16729	16251	13775	9490	8376	6528	11462	8071	7399	5798	4913	4565	13983	12154	12491	10941	13821	8471	8830	12371	6677	11093	11305	7924	9174	7153	7316	9290	5394	6068	25627	30068	21813	14013	13237	11135	15165	11658	10063	6466	5135	5108	3471
890.633	34291	21561	27388	17791	13274	15284	17539	15359	14152	9406	7779	6470	10532	7826	7320	5947	4967	4114	9672	13382	13189	10381	11990	13790	10347	9651	7043	8044	10199	6837	6867	5035	8397	9445	5824	7638	28961	30183	22030	15105	14075	11875	15109	11627	9105	5423	5690	4918	3494
892.633	34385	23408	26612	16999	15590	10885	17521	14367	13363	10974	7894	6387	11642	7868	7124	6139	4902	5217	10819	12804	12672	12165	12714	9042	10635	11288	12535	11380	10425	6674	6478	8198	5082	8834	6827	6565	34376	27836	21018	15643	13197	11503	15940	12424	9635	6220	5274	5136	3567
894.633	28821	21158	27106	18993	14724	14060	17635	16115	13629	10787	8709	7565	10300	7815	7339	6162	5502	5378	14470	13999	13520	14265	12117	7899	10248	11857	12251	9467	9818	8629	8165	7827	4929	9274	4498	6978	27543	31008	21084	16022	13897	9649	15731	13361	10117	6513	4958	4974	3473
896.633	35596	25145	27293	18601	15561	12013	14209	13671	14047	9951	9634	7266	11083	7358	7528	5987	5064	5235	13990	13715	14330	10196	11971	11440	9497	9347	12795	11646	10360	9451	10327	7710	7277	9134	4794	8735	30083	25392	21313	14737	14709	12192	15319	12251	9492	6455	5527	5088	4024
898.633	32272	24222	27955	16614	15208	12153	16799	14534	13558	10866	7700	7495	12074	7199	6523	5347	5075	4579	12633	13977	13603	12397	13092	8204	10664	10538	9152	9442	6830	9722	11126	8219	5832	8964	4158	4860	31323	29243	17453	13268	12089	11307	14976	13779	9849	6564	5329	4905	3344
900.633	28681	24295	26117	18395	12459	16604	16443	16461	13523	9668	7601	6960	12438	7988	6688	6162	4996	5474	13770	13312	13618	11058	12557	6785	7202	14044	12985	7665	10375	8621	7559	8008	7665	8472	8152	6095	28595	30048	21320	15722	13169	11679	15640	13242	9482	6245	5324	4620	3306
902.633	36659	24784	24633	18938	15817	14911	16543	16098	14126	10082	8987	7456	10011	7924	6423	6180	4650	4597	14779	16269	13460	10511	11466	9026	8712	13480	10104	9403	10477	8907	9669	8077	7749	8922	6246	8239	28734	30029	18273	16201	14358	10925	15468	11819	8941	6213	5279	5220	3229
904.633	31429	23421	27865	18545	14100	15636	17111	13818	13148	9870	8155	6787	10964	7494	6950	6044	4856	4138	13043	16300	12738	13093	13438	10604	9173	14091	10766	12240	5197	9030	6470	8131	7861	8351	9596	7495	35308	29804	21006	15652	13847	9496	15415	11973	9967	6763	5434	4841	3142
906.633	33298	21310	27645	17931	15134	13259	16061	13193	13741	8488	8907	6617	10834	8379	7548	6051	5158	5239	15817	14247	13182	13516	11216	7493	9187	11217	12203	9341	6319	7432	7901	6244	9006	9362	5034	6920	27489	30041	21674	13760	14302	11600	14735	12674	9493	6468	5260	5058	3864
908.633	26959	23854	27017	17779	15064	14327	17785	14368	14282	9048	8544	7355	10991	8008	6735	6327	5016	5709	14412	12843	12689	10710	12006	12729	10121	9904	11294	8908	9380	8388	9938	8451	8614	8672	4747	8438	25508	29961	21604	16316	13985	11741	15883	13115	10287	6503	5238	5006	3355
910.633	31772	24571	26396	19061	14205	13265	17582	15631	14331	8928	9776	7792	12359	8268	7749	6313	5329	5475	14033	14954	12629	12595	11991	8023	7565	8904	7159	8618	10772	6491	11626	8392	8583	9266	5933	6419	25707	30545	21854	14260	13993	11654	16444	11983	10318	6583	5493	4554	3190
912.633	33550	24569	27106	18407	15499	12265	15199	13862	15077	11316	9925	7356	12195	8013	7565	6720	5363	4486	13777	14707	13595	12098	12130	10979	11279	12140	12814	6558	10322	9646	6551	8131	4883	8575	7589	5659	26851	28720	18417	13261	14135	9496	16157	13102	9955	6796	5482	5091	3654
914.633	32082	24314	28253	19979	14507	18183	15159	15912	14388	10482	7783	7155	10218	8252	5902	5961	4934	5802	13400	16789	12829	11424	11442	7683	8468	12453	8569	11649	10510	9173	9646	7650	8358	9481	8287	7737	35019	29363	21271	15684	12325	9393	15607	12751	10423	6291	5267	5101	3709
916.633	31758	23938	27448	17739	15905	11211	16897	16117	13923	8736	9125	7206	11586	8142	7716	6518	5379	4365	15159	15188	12698	10711	11824	8594	7602	15117	8538	7209	10811	8762	7637	7342	8356	9443	8319	6356	29984	29467	21908	15680	15004	11597	15688	11652	10122	6375	5465	5096	3745
918.633	30500	23755	26305	17655	14598	17296	17198	13855	14687	9028	7851	7109	12144	7297	6415	6067	4614	4747	14894	14350	13684	11159	13085	7712	10613	15518	10815	8060	10139	6316	4990	7562	6084	9469	6013	6715	30253	31213	20143	16129	12772	11723	15989	11494	10128	6486	5270	5102	3224
920.633	28998	26053	24701	19704	15026	13712	18080	16702	13591	9384	9023	7335	11703	8495	7148	6463	5340	4955	11537	13870	12787	10957	13704	13819	11209	15290	12812	10305	10609	8222	10275	8186	7361	9129	9465	5769	35435	27203	16234	16094	14356	11278	15986	12625	9282	6325	5725	4572	3477
922.633	31499	25760	24901	19115	16263	12579	17394	16688	14427	10887	8457	7307	11796	8163	7590	6518	5510	5182	15892	13946	13882	9965	11793	8637	11025	5836	7962	8248	11358	6320	7536	7131	7516	9585	4586	5404	34252	29947	21870	15787	14124	11767	16118	13545	10209	6931	4971	4933	3527
924.633	32971	23418	27306	17948	15446	15237	17322	15121	14058	9085	8785	7655	10902	7471	6869	6366	5398	4730	13121	14946	14033	10359	12035	13655	6048	8336	12799	7966	7095	9045	5539	8369	8817	8804	8082	5933	34853	29463	17263	15598	14591	9738	16481	11368	10535	6699	5471	5044	3643
926.633	26916	23461	26271	19380	15723	13764	17766	17022	14490	9757	9555	7212	12173	8588	7653	6247	5490	5201	14275	14412	13623	12974	11494	8017	10305	10650	10576	6792	11065	9691	6771	8204	8665	7882	9676	8320	35345	30645	17481	15571	15039	9725	15868	11455	10147	6635	5312	4973	3725
[truncated: 137 more rows]
[truncated: 47 more columns]

## Sheet: plate4
Set Temperature	Setpoint 60°C
Excitation: 450/9.0, Emission: 482/9.0
Optics: Bottom, Gain: 85
	[EGCG]:[a-Syn]																		a-Syn + 1.125 % DMSO
[truncated: 542 more rows]
